# Supplementary material
Source: publisher figshare collection journal article supplement (https://acs.figshare.com/ndownloader/files/5649198)
Supplement: Supplementary file 1 [file 5649198]

 data_shelx
 
_audit_creation_method            'SHELXL-2014/7'
_shelx_SHELXL_version_number      '2014/7'
_chemical_name_systematic         ?
_chemical_name_common             ?
_chemical_melting_point           ?
_chemical_formula_moiety        'C38 H28 Cl Cu N5 P'
_chemical_formula_sum		'C38 H28 Cl Cu N5 P' 
_chemical_formula_weight          684.61

loop_
 _atom_type_symbol
 _atom_type_description
 _atom_type_scat_dispersion_real
 _atom_type_scat_dispersion_imag
 _atom_type_scat_source
 'C'  'C'   0.0033   0.0016
 'International Tables Vol C Tables 4.2.6.8 and 6.1.1.4'
 'H'  'H'   0.0000   0.0000
 'International Tables Vol C Tables 4.2.6.8 and 6.1.1.4'
 'N'  'N'   0.0061   0.0033
 'International Tables Vol C Tables 4.2.6.8 and 6.1.1.4'
 'P'  'P'   0.1023   0.0942
 'International Tables Vol C Tables 4.2.6.8 and 6.1.1.4'
 'Cl'  'Cl'   0.1484   0.1585
 'International Tables Vol C Tables 4.2.6.8 and 6.1.1.4'
 'Cu'  'Cu'   0.3201   1.2651
 'International Tables Vol C Tables 4.2.6.8 and 6.1.1.4'
 
_space_group_crystal_system       triclinic
_space_group_IT_number            2
_space_group_name_H-M_alt         'P -1'
_space_group_name_Hall            '-P 1'
 
_shelx_space_group_comment
;
The symmetry employed for this shelxl refinement is uniquely defined
by the following loop, which should always be used as a source of
symmetry information in preference to the above space-group names.
They are only intended as comments.
;
 
loop_
 _space_group_symop_operation_xyz
 'x, y, z'
 '-x, -y, -z'
 
_cell_length_a                    9.9687(5)
_cell_length_b                    10.0509(5)
_cell_length_c                    15.8649(10)
_cell_angle_alpha                 82.600(5)
_cell_angle_beta                  74.265(5)
_cell_angle_gamma                 81.680(4)
_cell_volume                      1507.19(15)
_cell_formula_units_Z             2
_cell_measurement_temperature     293(2)
_cell_measurement_reflns_used     2180
_cell_measurement_theta_min       3.10
_cell_measurement_theta_max       25.30
 
_exptl_crystal_description        prisam
_exptl_crystal_colour             colorless
_exptl_crystal_density_meas      'not measured'
_exptl_crystal_density_method     ?
_exptl_crystal_density_diffrn     1.509          
_exptl_crystal_F_000              704
_exptl_transmission_factor_min    ?
_exptl_transmission_factor_max    ?
_exptl_crystal_size_max           0.26
_exptl_crystal_size_mid           0.1
_exptl_crystal_size_min           0.1
_exptl_absorpt_coefficient_mu     0.905
_shelx_estimated_absorpt_T_min    0.803
_shelx_estimated_absorpt_T_max    0.917
_exptl_absorpt_correction_type    numerical
_exptl_absorpt_correction_T_min   0.802
_exptl_absorpt_correction_T_max   0.915
_exptl_absorpt_process_details    'NUMABS (Rigaku, 1999)'
_exptl_absorpt_special_details    ?
_diffrn_ambient_temperature       293(2)
_diffrn_radiation_wavelength      0.71073
_diffrn_radiation_type            MoK\a
_diffrn_source                    ?
_diffrn_measurement_device_type   'Rigaku Saturn724'
_diffrn_measurement_method        \w
_diffrn_detector_area_resol_mean  ?
_diffrn_reflns_number             11168
_diffrn_reflns_av_unetI/netI      0.0483
_diffrn_reflns_av_R_equivalents   0.0401
_diffrn_reflns_limit_h_min        -10
_diffrn_reflns_limit_h_max        11
_diffrn_reflns_limit_k_min        -7
_diffrn_reflns_limit_k_max        11
_diffrn_reflns_limit_l_min        -18
_diffrn_reflns_limit_l_max        18
_diffrn_reflns_theta_min          2.057
_diffrn_reflns_theta_max          24.997
_diffrn_reflns_theta_full         24.997
_diffrn_measured_fraction_theta_max   0.981
_diffrn_measured_fraction_theta_full  0.981
_diffrn_reflns_Laue_measured_fraction_max    0.981
_diffrn_reflns_Laue_measured_fraction_full   0.981
_diffrn_reflns_point_group_measured_fraction_max   0.981
_diffrn_reflns_point_group_measured_fraction_full  0.981
_reflns_number_total              5182
_reflns_number_gt                 4560
_reflns_threshold_expression      'I > 2\s(I)'
_reflns_Friedel_coverage          0.000
_reflns_Friedel_fraction_max      .
_reflns_Friedel_fraction_full     .
 
_reflns_special_details
;
 Reflections were merged by SHELXL according to the crystal
 class for the calculation of statistics and refinement.
 
 _reflns_Friedel_fraction is defined as the number of unique
 Friedel pairs measured divided by the number that would be
 possible theoretically, ignoring centric projections and
 systematic absences.
;
 
_computing_data_collection        ?
_computing_cell_refinement        ?
_computing_data_reduction         ?
_computing_structure_solution     ?
_computing_structure_refinement 'SHELXL-2014/7 (Sheldrick, 2014)'
_computing_molecular_graphics     ?
_computing_publication_material   ?
_refine_special_details           ?
_refine_ls_structure_factor_coef  Fsqd
_refine_ls_matrix_type            full
_refine_ls_weighting_scheme       calc
_refine_ls_weighting_details
'w=1/[\s^2^(Fo^2^)+(0.0770P)^2^+1.2120P] where P=(Fo^2^+2Fc^2^)/3'
_atom_sites_solution_primary      direct
_atom_sites_solution_secondary    difmap
_atom_sites_solution_hydrogens    geom
_refine_ls_hydrogen_treatment     mixed
_refine_ls_extinction_method      none
_refine_ls_extinction_coef        .
_refine_ls_number_reflns          5182
_refine_ls_number_parameters      415
_refine_ls_number_restraints      0
_refine_ls_R_factor_all           0.0539
_refine_ls_R_factor_gt            0.0470
_refine_ls_wR_factor_ref          0.1243
_refine_ls_wR_factor_gt           0.1190
_refine_ls_goodness_of_fit_ref    1.031
_refine_ls_restrained_S_all       1.031
_refine_ls_shift/su_max           0.000
_refine_ls_shift/su_mean          0.000
 
loop_
 _atom_site_label
 _atom_site_type_symbol
 _atom_site_fract_x
 _atom_site_fract_y
 _atom_site_fract_z
 _atom_site_U_iso_or_equiv
 _atom_site_adp_type
 _atom_site_occupancy
 _atom_site_site_symmetry_order  
 _atom_site_calc_flag
 _atom_site_refinement_flags_posn
 _atom_site_refinement_flags_adp
 _atom_site_refinement_flags_occupancy
 _atom_site_disorder_assembly
 _atom_site_disorder_group
Cu1 Cu 0.42528(4) 0.72234(3) 0.20311(2) 0.01293(14) Uani 1 1 d . . . . .
Cl1 Cl 0.31578(8) 0.88690(7) 0.12542(5) 0.01643(19) Uani 1 1 d . . . . .
P1 P 0.55331(8) 0.79275(7) 0.27631(5) 0.01078(18) Uani 1 1 d . . . . .
N4 N 0.5539(3) 0.5822(2) 0.11638(16) 0.0134(5) Uani 1 1 d . . . . .
N5 N 0.3129(3) 0.5581(2) 0.24054(16) 0.0149(5) Uani 1 1 d . . . . .
N1 N 0.3872(3) 0.9899(2) 0.37793(16) 0.0145(5) Uani 1 1 d . . . . .
N3 N 0.4960(3) 1.1619(3) 0.36373(17) 0.0176(6) Uani 1 1 d . . . . .
N2 N 0.3783(3) 1.1143(2) 0.40269(17) 0.0183(6) Uani 1 1 d . . . . .
C30 C 0.3707(3) 0.4515(3) 0.19385(19) 0.0135(6) Uani 1 1 d . . . . .
C8 C 0.5830(3) 1.0666(3) 0.31475(18) 0.0118(6) Uani 1 1 d . . . . .
C6 C 0.1814(3) 0.8955(3) 0.3675(2) 0.0173(7) Uani 1 1 d . . . . .
H6 H 0.2064 0.9146 0.3067 0.021 Uiso 1 1 calc R U . . .
C00C C 0.8383(3) 0.7250(3) 0.19556(19) 0.0155(6) Uani 1 1 d . . . . .
H00C H 0.8407 0.6632 0.2442 0.019 Uiso 1 1 calc R U . . .
C31 C 0.4981(3) 0.4649(3) 0.1269(2) 0.0142(6) Uani 1 1 d . . . . .
C1 C 0.2671(3) 0.9183(3) 0.41721(19) 0.0131(6) Uani 1 1 d . . . . .
C21 C 0.7159(3) 0.8077(3) 0.19211(19) 0.0126(6) Uani 1 1 d . . . . .
C13 C 0.9703(3) 1.0513(4) 0.2133(2) 0.0264(8) Uani 1 1 d . . . . .
H13 H 1.0503 0.9892 0.2073 0.032 Uiso 1 1 calc R U . . .
C37 C 0.6712(3) 0.5948(3) 0.0545(2) 0.0169(7) Uani 1 1 d . . . . .
H37 H 0.7113 0.6749 0.0472 0.020 Uiso 1 1 calc R U . . .
C22 C 0.7131(3) 0.8975(3) 0.11805(19) 0.0140(6) Uani 1 1 d . . . . .
H22 H 0.6306 0.9519 0.1146 0.017 Uiso 1 1 calc R U . . .
C7 C 0.5149(3) 0.9545(3) 0.32280(18) 0.0112(6) Uani 1 1 d . . . . .
C16 C 0.6542(3) 0.7159(3) 0.42809(19) 0.0152(6) Uani 1 1 d . . . . .
H16 H 0.6559 0.8069 0.4327 0.018 Uiso 1 1 calc R U . . .
C29 C 0.3097(3) 0.3302(3) 0.2088(2) 0.0163(6) Uani 1 1 d . . . . .
C2 C 0.2323(3) 0.8893(3) 0.5071(2) 0.0175(7) Uani 1 1 d . . . . .
H2 H 0.2923 0.9047 0.5398 0.021 Uiso 1 1 calc R U . . .
C35 C 0.6816(3) 0.3767(3) 0.0089(2) 0.0174(7) Uani 1 1 d . . . . .
H35 H 0.7242 0.3091 -0.0278 0.021 Uiso 1 1 calc R U . . .
C17 C 0.6999(3) 0.6186(3) 0.4873(2) 0.0178(7) Uani 1 1 d . . . . .
H17 H 0.7314 0.6446 0.5322 0.021 Uiso 1 1 calc R U . . .
C36 C 0.7385(3) 0.4944(3) -0.0005(2) 0.0171(7) Uani 1 1 d . . . . .
H36 H 0.8214 0.5079 -0.0431 0.021 Uiso 1 1 calc R U . . .
C9 C 0.7218(3) 1.1033(3) 0.26666(19) 0.0138(6) Uani 1 1 d . . . . .
C5 C 0.0571(3) 0.8436(3) 0.4096(2) 0.0196(7) Uani 1 1 d . . . . .
H5 H -0.0023 0.8273 0.3768 0.024 Uiso 1 1 calc R U . . .
C14 C 0.8423(3) 1.0134(3) 0.2614(2) 0.0194(7) Uani 1 1 d . . . . .
H14 H 0.8367 0.9271 0.2904 0.023 Uiso 1 1 calc R U . . .
C15 C 0.6060(3) 0.6772(3) 0.36195(19) 0.0127(6) Uani 1 1 d . . . . .
C4 C 0.0198(3) 0.8156(3) 0.4996(2) 0.0194(7) Uani 1 1 d . . . . .
H4 H -0.0649 0.7820 0.5274 0.023 Uiso 1 1 calc R U . . .
C23 C 0.8325(3) 0.9061(3) 0.0496(2) 0.0180(7) Uani 1 1 d . . . . .
H23 H 0.8305 0.9665 0.0002 0.022 Uiso 1 1 calc R U . . .
C12 C 0.9799(4) 1.1807(4) 0.1741(2) 0.0301(9) Uani 1 1 d . . . . .
H12 H 1.0664 1.2060 0.1413 0.036 Uiso 1 1 calc R U . . .
C3 C 0.1078(3) 0.8374(3) 0.5483(2) 0.0192(7) Uani 1 1 d . . . . .
H3 H 0.0835 0.8171 0.6090 0.023 Uiso 1 1 calc R U . . .
C27 C 0.1258(4) 0.4312(3) 0.3196(2) 0.0217(7) Uani 1 1 d . . . . .
H27 H 0.0411 0.4280 0.3622 0.026 Uiso 1 1 calc R U . . .
C33 C 0.4925(3) 0.2380(3) 0.0897(2) 0.0190(7) Uani 1 1 d . . . . .
H33 H 0.5310 0.1684 0.0540 0.023 Uiso 1 1 calc R U . . .
C24 C 0.9546(3) 0.8252(3) 0.0546(2) 0.0197(7) Uani 1 1 d . . . . .
H24 H 1.0355 0.8322 0.0091 0.024 Uiso 1 1 calc R U . . .
C26 C 0.1938(3) 0.5471(3) 0.3008(2) 0.0177(7) Uani 1 1 d . . . . .
H26 H 0.1528 0.6208 0.3325 0.021 Uiso 1 1 calc R U . . .
C18 C 0.6991(3) 0.4833(3) 0.4804(2) 0.0185(7) Uani 1 1 d . . . . .
H18 H 0.7318 0.4182 0.5196 0.022 Uiso 1 1 calc R U . . .
C25 C 0.9571(3) 0.7344(3) 0.1266(2) 0.0200(7) Uani 1 1 d . . . . .
H25 H 1.0393 0.6788 0.1291 0.024 Uiso 1 1 calc R U . . .
C34 C 0.3755(4) 0.2233(3) 0.1551(2) 0.0201(7) Uani 1 1 d . . . . .
H34 H 0.3369 0.1420 0.1654 0.024 Uiso 1 1 calc R U . . .
C19 C 0.6497(3) 0.4448(3) 0.4148(2) 0.0201(7) Uani 1 1 d . . . . .
H19 H 0.6482 0.3538 0.4101 0.024 Uiso 1 1 calc R U . . .
C32 C 0.5582(3) 0.3588(3) 0.0744(2) 0.0155(6) Uani 1 1 d . . . . .
C10 C 0.7334(3) 1.2342(3) 0.2285(2) 0.0199(7) Uani 1 1 d . . . . .
H10 H 0.6534 1.2963 0.2335 0.024 Uiso 1 1 calc R U . . .
C28 C 0.1861(4) 0.3230(3) 0.2743(2) 0.0208(7) Uani 1 1 d . . . . .
H28 H 0.1441 0.2434 0.2874 0.025 Uiso 1 1 calc R U . . .
C20 C 0.6026(3) 0.5418(3) 0.3568(2) 0.0169(7) Uani 1 1 d . . . . .
H20 H 0.5680 0.5158 0.3133 0.020 Uiso 1 1 calc R U . . .
C11 C 0.8617(4) 1.2736(4) 0.1832(2) 0.0286(8) Uani 1 1 d . . . . .
H11 H 0.8689 1.3623 0.1588 0.034 Uiso 1 1 calc R U . . .
 
loop_
 _atom_site_aniso_label
 _atom_site_aniso_U_11
 _atom_site_aniso_U_22
 _atom_site_aniso_U_33
 _atom_site_aniso_U_23
 _atom_site_aniso_U_13
 _atom_site_aniso_U_12
Cu1 0.0147(2) 0.0100(2) 0.0159(2) -0.00280(14) -0.00747(15) 0.00081(14)
Cl1 0.0213(4) 0.0121(4) 0.0169(4) -0.0026(3) -0.0093(3) 0.0044(3)
P1 0.0127(4) 0.0079(4) 0.0123(4) -0.0023(3) -0.0053(3) 0.0019(3)
N4 0.0136(13) 0.0118(12) 0.0165(13) -0.0022(10) -0.0089(10) 0.0029(9)
N5 0.0181(14) 0.0133(13) 0.0153(13) -0.0012(10) -0.0090(11) 0.0003(10)
N1 0.0156(13) 0.0125(12) 0.0167(13) -0.0040(10) -0.0074(11) 0.0027(10)
N3 0.0162(14) 0.0173(13) 0.0194(14) -0.0073(11) -0.0027(11) -0.0011(10)
N2 0.0194(14) 0.0131(13) 0.0222(14) -0.0071(11) -0.0032(11) -0.0010(10)
C30 0.0198(16) 0.0100(14) 0.0157(15) 0.0000(11) -0.0152(13) 0.0012(11)
C8 0.0155(15) 0.0109(14) 0.0105(14) -0.0032(11) -0.0076(12) 0.0038(11)
C6 0.0174(16) 0.0181(16) 0.0161(15) -0.0043(12) -0.0060(13) 0.0043(12)
C00C 0.0187(16) 0.0159(15) 0.0120(14) -0.0023(12) -0.0058(12) 0.0016(12)
C31 0.0158(15) 0.0121(15) 0.0177(15) -0.0013(12) -0.0116(13) 0.0028(11)
C1 0.0126(15) 0.0076(14) 0.0189(15) -0.0035(11) -0.0056(12) 0.0044(11)
C21 0.0149(15) 0.0106(14) 0.0137(15) -0.0043(11) -0.0048(12) -0.0013(11)
C13 0.0152(17) 0.044(2) 0.0234(18) -0.0170(16) -0.0090(14) 0.0035(14)
C37 0.0173(16) 0.0169(15) 0.0189(16) -0.0027(12) -0.0091(13) 0.0000(12)
C22 0.0187(16) 0.0103(14) 0.0154(15) -0.0043(11) -0.0068(12) -0.0015(11)
C7 0.0141(15) 0.0100(14) 0.0107(14) -0.0014(11) -0.0079(12) 0.0042(11)
C16 0.0213(16) 0.0111(14) 0.0149(15) -0.0017(12) -0.0082(13) 0.0002(11)
C29 0.0226(17) 0.0145(15) 0.0162(15) 0.0001(12) -0.0138(13) -0.0008(12)
C2 0.0235(17) 0.0120(15) 0.0196(16) -0.0033(12) -0.0106(13) 0.0012(12)
C35 0.0201(17) 0.0175(16) 0.0170(16) -0.0072(12) -0.0109(13) 0.0071(12)
C17 0.0229(17) 0.0158(15) 0.0167(15) -0.0036(12) -0.0094(13) 0.0018(12)
C36 0.0158(16) 0.0206(16) 0.0165(16) -0.0063(12) -0.0069(13) 0.0017(12)
C9 0.0152(15) 0.0193(16) 0.0105(14) -0.0064(12) -0.0083(12) 0.0000(12)
C5 0.0192(17) 0.0179(16) 0.0250(18) -0.0036(13) -0.0131(14) 0.0027(12)
C14 0.0203(17) 0.0226(17) 0.0196(16) -0.0111(13) -0.0113(13) 0.0034(13)
C15 0.0137(15) 0.0134(14) 0.0104(14) -0.0009(11) -0.0040(12) 0.0019(11)
C4 0.0173(16) 0.0128(15) 0.0264(17) -0.0018(13) -0.0042(14) 0.0015(12)
C23 0.0262(18) 0.0145(15) 0.0158(15) 0.0005(12) -0.0083(13) -0.0061(12)
C12 0.0219(19) 0.054(2) 0.0167(17) -0.0080(16) -0.0033(14) -0.0122(16)
C3 0.0240(17) 0.0134(15) 0.0187(16) -0.0017(12) -0.0052(14) 0.0025(12)
C27 0.0247(18) 0.0258(18) 0.0161(16) 0.0031(13) -0.0075(14) -0.0078(13)
C33 0.0273(18) 0.0125(15) 0.0200(16) -0.0034(12) -0.0136(14) 0.0047(12)
C24 0.0192(17) 0.0233(17) 0.0163(16) -0.0067(13) 0.0001(13) -0.0059(13)
C26 0.0184(16) 0.0190(16) 0.0159(15) -0.0028(12) -0.0058(13) 0.0006(12)
C18 0.0254(18) 0.0141(15) 0.0150(15) 0.0018(12) -0.0082(13) 0.0043(12)
C25 0.0165(16) 0.0195(16) 0.0229(17) -0.0045(13) -0.0055(13) 0.0045(12)
C34 0.0309(19) 0.0115(15) 0.0242(17) -0.0012(13) -0.0179(15) -0.0024(13)
C19 0.0270(18) 0.0107(15) 0.0222(17) -0.0005(12) -0.0080(14) 0.0011(12)
C32 0.0212(17) 0.0127(15) 0.0170(15) -0.0022(12) -0.0145(13) 0.0032(12)
C10 0.0226(17) 0.0220(17) 0.0166(16) -0.0009(13) -0.0097(13) 0.0006(13)
C28 0.0280(19) 0.0172(16) 0.0206(17) 0.0030(13) -0.0113(14) -0.0079(13)
C20 0.0210(17) 0.0132(15) 0.0175(16) -0.0019(12) -0.0075(13) 0.0006(12)
C11 0.036(2) 0.036(2) 0.0169(17) 0.0053(15) -0.0114(15) -0.0145(16)
 
_geom_special_details
;
 All esds (except the esd in the dihedral angle between two l.s. planes)
 are estimated using the full covariance matrix.  The cell esds are taken
 into account individually in the estimation of esds in distances, angles
 and torsion angles; correlations between esds in cell parameters are only
 used when they are defined by crystal symmetry.  An approximate (isotropic)
 treatment of cell esds is used for estimating esds involving l.s. planes.
;
 
loop_
 _geom_bond_atom_site_label_1
 _geom_bond_atom_site_label_2
 _geom_bond_distance
 _geom_bond_site_symmetry_2
 _geom_bond_publ_flag
Cu1 N5 2.062(2) . ?
Cu1 N4 2.131(2) . ?
Cu1 P1 2.1807(8) . ?
Cu1 Cl1 2.2647(8) . ?
P1 C15 1.810(3) . ?
P1 C21 1.810(3) . ?
P1 C7 1.819(3) . ?
N4 C37 1.317(4) . ?
N4 C31 1.348(4) . ?
N5 C26 1.316(4) . ?
N5 C30 1.351(4) . ?
N1 N2 1.343(3) . ?
N1 C7 1.363(4) . ?
N1 C1 1.439(4) . ?
N3 N2 1.296(4) . ?
N3 C8 1.363(4) . ?
C30 C29 1.405(4) . ?
C30 C31 1.428(4) . ?
C8 C7 1.372(4) . ?
C8 C9 1.462(4) . ?
C6 C1 1.368(5) . ?
C6 C5 1.380(4) . ?
C6 H6 0.9300 . ?
C00C C25 1.382(4) . ?
C00C C21 1.384(4) . ?
C00C H00C 0.9300 . ?
C31 C32 1.401(4) . ?
C1 C2 1.376(4) . ?
C21 C22 1.391(4) . ?
C13 C12 1.372(5) . ?
C13 C14 1.376(5) . ?
C13 H13 0.9300 . ?
C37 C36 1.394(4) . ?
C37 H37 0.9300 . ?
C22 C23 1.381(4) . ?
C22 H22 0.9300 . ?
C16 C17 1.383(4) . ?
C16 C15 1.385(4) . ?
C16 H16 0.9300 . ?
C29 C28 1.385(4) . ?
C29 C34 1.428(4) . ?
C2 C3 1.378(4) . ?
C2 H2 0.9300 . ?
C35 C36 1.359(4) . ?
C35 C32 1.396(4) . ?
C35 H35 0.9300 . ?
C17 C18 1.380(4) . ?
C17 H17 0.9300 . ?
C36 H36 0.9300 . ?
C9 C10 1.383(4) . ?
C9 C14 1.384(4) . ?
C5 C4 1.377(5) . ?
C5 H5 0.9300 . ?
C14 H14 0.9300 . ?
C15 C20 1.379(4) . ?
C4 C3 1.371(5) . ?
C4 H4 0.9300 . ?
C23 C24 1.378(5) . ?
C23 H23 0.9300 . ?
C12 C11 1.380(5) . ?
C12 H12 0.9300 . ?
C3 H3 0.9300 . ?
C27 C28 1.355(5) . ?
C27 C26 1.391(4) . ?
C27 H27 0.9300 . ?
C33 C34 1.346(5) . ?
C33 C32 1.425(4) . ?
C33 H33 0.9300 . ?
C24 C25 1.370(5) . ?
C24 H24 0.9300 . ?
C26 H26 0.9300 . ?
C18 C19 1.382(5) . ?
C18 H18 0.9300 . ?
C25 H25 0.9300 . ?
C34 H34 0.9300 . ?
C19 C20 1.375(4) . ?
C19 H19 0.9300 . ?
C10 C11 1.372(5) . ?
C10 H10 0.9300 . ?
C28 H28 0.9300 . ?
C20 H20 0.9300 . ?
C11 H11 0.9300 . ?
 
loop_
 _geom_angle_atom_site_label_1
 _geom_angle_atom_site_label_2
 _geom_angle_atom_site_label_3
 _geom_angle
 _geom_angle_site_symmetry_1
 _geom_angle_site_symmetry_3
 _geom_angle_publ_flag
N5 Cu1 N4 79.47(9) . . ?
N5 Cu1 P1 126.38(7) . . ?
N4 Cu1 P1 108.78(7) . . ?
N5 Cu1 Cl1 110.82(8) . . ?
N4 Cu1 Cl1 109.30(7) . . ?
P1 Cu1 Cl1 115.11(3) . . ?
C15 P1 C21 103.52(14) . . ?
C15 P1 C7 103.37(13) . . ?
C21 P1 C7 103.88(13) . . ?
C15 P1 Cu1 117.97(10) . . ?
C21 P1 Cu1 101.19(10) . . ?
C7 P1 Cu1 124.12(10) . . ?
C37 N4 C31 117.6(3) . . ?
C37 N4 Cu1 130.8(2) . . ?
C31 N4 Cu1 111.59(19) . . ?
C26 N5 C30 117.9(3) . . ?
C26 N5 Cu1 128.5(2) . . ?
C30 N5 Cu1 113.6(2) . . ?
N2 N1 C7 111.4(2) . . ?
N2 N1 C1 115.6(2) . . ?
C7 N1 C1 132.9(2) . . ?
N2 N3 C8 108.9(2) . . ?
N3 N2 N1 107.5(2) . . ?
N5 C30 C29 122.4(3) . . ?
N5 C30 C31 117.9(3) . . ?
C29 C30 C31 119.8(3) . . ?
N3 C8 C7 109.2(3) . . ?
N3 C8 C9 116.2(3) . . ?
C7 C8 C9 134.6(3) . . ?
C1 C6 C5 118.5(3) . . ?
C1 C6 H6 120.8 . . ?
C5 C6 H6 120.8 . . ?
C25 C00C C21 119.9(3) . . ?
C25 C00C H00C 120.0 . . ?
C21 C00C H00C 120.0 . . ?
N4 C31 C32 122.9(3) . . ?
N4 C31 C30 117.5(3) . . ?
C32 C31 C30 119.7(3) . . ?
C6 C1 C2 121.5(3) . . ?
C6 C1 N1 120.2(3) . . ?
C2 C1 N1 117.8(3) . . ?
C00C C21 C22 119.3(3) . . ?
C00C C21 P1 122.3(2) . . ?
C22 C21 P1 118.1(2) . . ?
C12 C13 C14 120.0(3) . . ?
C12 C13 H13 120.0 . . ?
C14 C13 H13 120.0 . . ?
N4 C37 C36 123.4(3) . . ?
N4 C37 H37 118.3 . . ?
C36 C37 H37 118.3 . . ?
C23 C22 C21 120.2(3) . . ?
C23 C22 H22 119.9 . . ?
C21 C22 H22 119.9 . . ?
N1 C7 C8 103.0(2) . . ?
N1 C7 P1 120.6(2) . . ?
C8 C7 P1 136.3(2) . . ?
C17 C16 C15 119.7(3) . . ?
C17 C16 H16 120.1 . . ?
C15 C16 H16 120.1 . . ?
C28 C29 C30 117.3(3) . . ?
C28 C29 C34 123.7(3) . . ?
C30 C29 C34 119.0(3) . . ?
C1 C2 C3 119.3(3) . . ?
C1 C2 H2 120.3 . . ?
C3 C2 H2 120.3 . . ?
C36 C35 C32 118.9(3) . . ?
C36 C35 H35 120.5 . . ?
C32 C35 H35 120.5 . . ?
C18 C17 C16 120.5(3) . . ?
C18 C17 H17 119.8 . . ?
C16 C17 H17 119.8 . . ?
C35 C36 C37 119.3(3) . . ?
C35 C36 H36 120.3 . . ?
C37 C36 H36 120.3 . . ?
C10 C9 C14 119.1(3) . . ?
C10 C9 C8 118.6(3) . . ?
C14 C9 C8 122.3(3) . . ?
C4 C5 C6 120.8(3) . . ?
C4 C5 H5 119.6 . . ?
C6 C5 H5 119.6 . . ?
C13 C14 C9 120.2(3) . . ?
C13 C14 H14 119.9 . . ?
C9 C14 H14 119.9 . . ?
C20 C15 C16 119.4(3) . . ?
C20 C15 P1 116.2(2) . . ?
C16 C15 P1 124.3(2) . . ?
C3 C4 C5 120.0(3) . . ?
C3 C4 H4 120.0 . . ?
C5 C4 H4 120.0 . . ?
C24 C23 C22 119.9(3) . . ?
C24 C23 H23 120.0 . . ?
C22 C23 H23 120.0 . . ?
C13 C12 C11 120.3(3) . . ?
C13 C12 H12 119.9 . . ?
C11 C12 H12 119.9 . . ?
C4 C3 C2 119.9(3) . . ?
C4 C3 H3 120.0 . . ?
C2 C3 H3 120.0 . . ?
C28 C27 C26 118.5(3) . . ?
C28 C27 H27 120.8 . . ?
C26 C27 H27 120.8 . . ?
C34 C33 C32 121.0(3) . . ?
C34 C33 H33 119.5 . . ?
C32 C33 H33 119.5 . . ?
C25 C24 C23 120.1(3) . . ?
C25 C24 H24 119.9 . . ?
C23 C24 H24 119.9 . . ?
N5 C26 C27 123.5(3) . . ?
N5 C26 H26 118.3 . . ?
C27 C26 H26 118.3 . . ?
C17 C18 C19 119.8(3) . . ?
C17 C18 H18 120.1 . . ?
C19 C18 H18 120.1 . . ?
C24 C25 C00C 120.5(3) . . ?
C24 C25 H25 119.8 . . ?
C00C C25 H25 119.8 . . ?
C33 C34 C29 121.2(3) . . ?
C33 C34 H34 119.4 . . ?
C29 C34 H34 119.4 . . ?
C20 C19 C18 119.6(3) . . ?
C20 C19 H19 120.2 . . ?
C18 C19 H19 120.2 . . ?
C35 C32 C31 117.9(3) . . ?
C35 C32 C33 122.7(3) . . ?
C31 C32 C33 119.4(3) . . ?
C11 C10 C9 120.7(3) . . ?
C11 C10 H10 119.7 . . ?
C9 C10 H10 119.7 . . ?
C27 C28 C29 120.4(3) . . ?
C27 C28 H28 119.8 . . ?
C29 C28 H28 119.8 . . ?
C19 C20 C15 121.0(3) . . ?
C19 C20 H20 119.5 . . ?
C15 C20 H20 119.5 . . ?
C10 C11 C12 119.6(3) . . ?
C10 C11 H11 120.2 . . ?
C12 C11 H11 120.2 . . ?
 
loop_
 _geom_torsion_atom_site_label_1
 _geom_torsion_atom_site_label_2
 _geom_torsion_atom_site_label_3
 _geom_torsion_atom_site_label_4
 _geom_torsion
 _geom_torsion_site_symmetry_1
 _geom_torsion_site_symmetry_2
 _geom_torsion_site_symmetry_3
 _geom_torsion_site_symmetry_4
 _geom_torsion_publ_flag
C8 N3 N2 N1 -1.2(3) . . . . ?
C7 N1 N2 N3 1.2(3) . . . . ?
C1 N1 N2 N3 177.9(3) . . . . ?
C26 N5 C30 C29 -1.3(4) . . . . ?
Cu1 N5 C30 C29 -179.5(2) . . . . ?
C26 N5 C30 C31 178.4(3) . . . . ?
Cu1 N5 C30 C31 0.2(3) . . . . ?
N2 N3 C8 C7 0.8(3) . . . . ?
N2 N3 C8 C9 -179.5(3) . . . . ?
C37 N4 C31 C32 -1.0(4) . . . . ?
Cu1 N4 C31 C32 176.4(2) . . . . ?
C37 N4 C31 C30 -179.9(3) . . . . ?
Cu1 N4 C31 C30 -2.5(3) . . . . ?
N5 C30 C31 N4 1.6(4) . . . . ?
C29 C30 C31 N4 -178.6(3) . . . . ?
N5 C30 C31 C32 -177.3(3) . . . . ?
C29 C30 C31 C32 2.4(4) . . . . ?
C5 C6 C1 C2 0.6(4) . . . . ?
C5 C6 C1 N1 -171.1(3) . . . . ?
N2 N1 C1 C6 109.7(3) . . . . ?
C7 N1 C1 C6 -74.5(4) . . . . ?
N2 N1 C1 C2 -62.3(3) . . . . ?
C7 N1 C1 C2 113.5(4) . . . . ?
C25 C00C C21 C22 1.5(4) . . . . ?
C25 C00C C21 P1 175.6(2) . . . . ?
C15 P1 C21 C00C 9.7(3) . . . . ?
C7 P1 C21 C00C 117.4(3) . . . . ?
Cu1 P1 C21 C00C -113.0(2) . . . . ?
C15 P1 C21 C22 -176.1(2) . . . . ?
C7 P1 C21 C22 -68.4(2) . . . . ?
Cu1 P1 C21 C22 61.2(2) . . . . ?
C31 N4 C37 C36 0.8(4) . . . . ?
Cu1 N4 C37 C36 -176.0(2) . . . . ?
C00C C21 C22 C23 -1.6(4) . . . . ?
P1 C21 C22 C23 -175.9(2) . . . . ?
N2 N1 C7 C8 -0.7(3) . . . . ?
C1 N1 C7 C8 -176.6(3) . . . . ?
N2 N1 C7 P1 -178.0(2) . . . . ?
C1 N1 C7 P1 6.1(4) . . . . ?
N3 C8 C7 N1 -0.1(3) . . . . ?
C9 C8 C7 N1 -179.7(3) . . . . ?
N3 C8 C7 P1 176.6(2) . . . . ?
C9 C8 C7 P1 -3.1(6) . . . . ?
C15 P1 C7 N1 -83.8(3) . . . . ?
C21 P1 C7 N1 168.4(2) . . . . ?
Cu1 P1 C7 N1 54.3(3) . . . . ?
C15 P1 C7 C8 100.1(3) . . . . ?
C21 P1 C7 C8 -7.8(4) . . . . ?
Cu1 P1 C7 C8 -121.9(3) . . . . ?
N5 C30 C29 C28 -0.1(4) . . . . ?
C31 C30 C29 C28 -179.8(3) . . . . ?
N5 C30 C29 C34 178.5(3) . . . . ?
C31 C30 C29 C34 -1.2(4) . . . . ?
C6 C1 C2 C3 -0.6(4) . . . . ?
N1 C1 C2 C3 171.3(3) . . . . ?
C15 C16 C17 C18 0.7(5) . . . . ?
C32 C35 C36 C37 -1.0(5) . . . . ?
N4 C37 C36 C35 0.2(5) . . . . ?
N3 C8 C9 C10 -38.5(4) . . . . ?
C7 C8 C9 C10 141.1(3) . . . . ?
N3 C8 C9 C14 138.6(3) . . . . ?
C7 C8 C9 C14 -41.8(5) . . . . ?
C1 C6 C5 C4 0.2(4) . . . . ?
C12 C13 C14 C9 3.4(5) . . . . ?
C10 C9 C14 C13 -4.7(5) . . . . ?
C8 C9 C14 C13 178.2(3) . . . . ?
C17 C16 C15 C20 0.8(4) . . . . ?
C17 C16 C15 P1 -176.1(2) . . . . ?
C21 P1 C15 C20 -90.1(2) . . . . ?
C7 P1 C15 C20 161.8(2) . . . . ?
Cu1 P1 C15 C20 20.7(3) . . . . ?
C21 P1 C15 C16 86.9(3) . . . . ?
C7 P1 C15 C16 -21.2(3) . . . . ?
Cu1 P1 C15 C16 -162.4(2) . . . . ?
C6 C5 C4 C3 -1.0(5) . . . . ?
C21 C22 C23 C24 0.2(4) . . . . ?
C14 C13 C12 C11 0.5(5) . . . . ?
C5 C4 C3 C2 1.1(5) . . . . ?
C1 C2 C3 C4 -0.3(4) . . . . ?
C22 C23 C24 C25 1.2(5) . . . . ?
C30 N5 C26 C27 1.0(5) . . . . ?
Cu1 N5 C26 C27 178.9(2) . . . . ?
C28 C27 C26 N5 0.8(5) . . . . ?
C16 C17 C18 C19 -1.3(5) . . . . ?
C23 C24 C25 C00C -1.3(5) . . . . ?
C21 C00C C25 C24 -0.1(5) . . . . ?
C32 C33 C34 C29 2.9(5) . . . . ?
C28 C29 C34 C33 177.0(3) . . . . ?
C30 C29 C34 C33 -1.4(5) . . . . ?
C17 C18 C19 C20 0.5(5) . . . . ?
C36 C35 C32 C31 0.8(4) . . . . ?
C36 C35 C32 C33 -179.1(3) . . . . ?
N4 C31 C32 C35 0.2(4) . . . . ?
C30 C31 C32 C35 179.1(3) . . . . ?
N4 C31 C32 C33 -179.9(3) . . . . ?
C30 C31 C32 C33 -1.1(4) . . . . ?
C34 C33 C32 C35 178.3(3) . . . . ?
C34 C33 C32 C31 -1.6(5) . . . . ?
C14 C9 C10 C11 2.3(5) . . . . ?
C8 C9 C10 C11 179.5(3) . . . . ?
C26 C27 C28 C29 -2.3(5) . . . . ?
C30 C29 C28 C27 2.0(5) . . . . ?
C34 C29 C28 C27 -176.5(3) . . . . ?
C18 C19 C20 C15 1.0(5) . . . . ?
C16 C15 C20 C19 -1.6(4) . . . . ?
P1 C15 C20 C19 175.5(2) . . . . ?
C9 C10 C11 C12 1.4(5) . . . . ?
C13 C12 C11 C10 -2.8(5) . . . . ?
 
_refine_diff_density_max    0.854
_refine_diff_density_min   -1.303
_refine_diff_density_rms    0.101

_shelx_res_file
;

    shelx.res created by SHELXL-2014/7

TITL msb-bc-06_mo_a.res in P-1
REM Old TITL MSB-BC-06_Mo in P-1 #2
REM SHELXT solution in P-1
REM R1 0.118, Rweak 0.008, Alpha 0.043, Orientation as input
REM Formula found by SHELXT: C38 N5 Cl2 Cu
CELL 0.71073 9.968664 10.050864 15.864899 82.5996 74.2655 81.6801
ZERR 2 0.000517 0.000467 0.001006 0.0045 0.005 0.0041
LATT 1
SFAC C H N P Cl Cu
UNIT 76 56 10 2 2 2

L.S. 10
PLAN  20
BOND $H
LIST 6
MORE -1
CONF
fmap 2
acta 52
OMIT -3 50
OMIT -1 1 3
OMIT -2 -1 1
OMIT 1 0 0
OMIT 0 2 3
OMIT 0 2 2
OMIT 1 -1 1
REM <olex2.extras>
REM <HklSrc "%.\\MSB-BC-06_Mo.hkl">
REM </olex2.extras>

WGHT    0.077000    1.212000
FVAR       0.69171
CU1   6    0.425277    0.722336    0.203114    11.00000    0.01469    0.01000 =
         0.01593   -0.00280   -0.00747    0.00081
CL1   5    0.315775    0.886896    0.125417    11.00000    0.02129    0.01215 =
         0.01688   -0.00264   -0.00933    0.00438
P1    4    0.553311    0.792753    0.276312    11.00000    0.01274    0.00795 =
         0.01226   -0.00228   -0.00527    0.00193
N4    3    0.553901    0.582173    0.116383    11.00000    0.01364    0.01183 =
         0.01652   -0.00216   -0.00886    0.00288
N5    3    0.312949    0.558136    0.240544    11.00000    0.01809    0.01330 =
         0.01533   -0.00122   -0.00899    0.00026
N1    3    0.387197    0.989856    0.377930    11.00000    0.01559    0.01248 =
         0.01666   -0.00401   -0.00735    0.00270
N3    3    0.496036    1.161890    0.363730    11.00000    0.01620    0.01734 =
         0.01942   -0.00735   -0.00269   -0.00106
N2    3    0.378341    1.114315    0.402687    11.00000    0.01944    0.01307 =
         0.02225   -0.00714   -0.00325   -0.00095
C30   1    0.370716    0.451489    0.193848    11.00000    0.01984    0.00999 =
         0.01566    0.00003   -0.01521    0.00124
C8    1    0.582954    1.066647    0.314755    11.00000    0.01548    0.01094 =
         0.01051   -0.00323   -0.00756    0.00380
C6    1    0.181414    0.895527    0.367476    11.00000    0.01738    0.01814 =
         0.01608   -0.00431   -0.00598    0.00427
AFIX  43
H6    2    0.206435    0.914644    0.306687    11.00000   -1.20000
AFIX   0
C00C  1    0.838336    0.725011    0.195561    11.00000    0.01874    0.01591 =
         0.01199   -0.00231   -0.00579    0.00156
AFIX  43
H00C  2    0.840703    0.663152    0.244213    11.00000   -1.20000
AFIX   0
C31   1    0.498072    0.464869    0.126891    11.00000    0.01582    0.01211 =
         0.01768   -0.00132   -0.01165    0.00284
C1    1    0.267065    0.918265    0.417206    11.00000    0.01262    0.00764 =
         0.01886   -0.00348   -0.00558    0.00438
C21   1    0.715872    0.807722    0.192115    11.00000    0.01486    0.01064 =
         0.01372   -0.00434   -0.00479   -0.00128
C13   1    0.970313    1.051320    0.213291    11.00000    0.01523    0.04444 =
         0.02345   -0.01699   -0.00903    0.00347
AFIX  43
H13   2    1.050332    0.989233    0.207342    11.00000   -1.20000
AFIX   0
C37   1    0.671238    0.594839    0.054527    11.00000    0.01734    0.01686 =
         0.01886   -0.00271   -0.00912    0.00003
AFIX  43
H37   2    0.711300    0.674942    0.047182    11.00000   -1.20000
AFIX   0
C22   1    0.713067    0.897528    0.118046    11.00000    0.01866    0.01028 =
         0.01540   -0.00428   -0.00685   -0.00154
AFIX  43
H22   2    0.630582    0.951931    0.114563    11.00000   -1.20000
AFIX   0
C7    1    0.514942    0.954534    0.322801    11.00000    0.01412    0.00999 =
         0.01068   -0.00136   -0.00787    0.00424
C16   1    0.654249    0.715895    0.428095    11.00000    0.02126    0.01114 =
         0.01488   -0.00168   -0.00816    0.00022
AFIX  43
H16   2    0.655926    0.806926    0.432679    11.00000   -1.20000
AFIX   0
C29   1    0.309719    0.330185    0.208786    11.00000    0.02256    0.01451 =
         0.01618    0.00010   -0.01375   -0.00078
C2    1    0.232324    0.889338    0.507124    11.00000    0.02349    0.01199 =
         0.01963   -0.00332   -0.01063    0.00118
AFIX  43
H2    2    0.292272    0.904683    0.539798    11.00000   -1.20000
AFIX   0
C35   1    0.681584    0.376659    0.008855    11.00000    0.02006    0.01746 =
         0.01700   -0.00715   -0.01091    0.00711
AFIX  43
H35   2    0.724173    0.309079   -0.027841    11.00000   -1.20000
AFIX   0
C17   1    0.699936    0.618615    0.487329    11.00000    0.02286    0.01580 =
         0.01667   -0.00360   -0.00940    0.00178
AFIX  43
H17   2    0.731402    0.644577    0.532163    11.00000   -1.20000
AFIX   0
C36   1    0.738471    0.494425   -0.000487    11.00000    0.01583    0.02060 =
         0.01655   -0.00632   -0.00691    0.00174
AFIX  43
H36   2    0.821395    0.507865   -0.043142    11.00000   -1.20000
AFIX   0
C9    1    0.721837    1.103292    0.266663    11.00000    0.01524    0.01934 =
         0.01048   -0.00644   -0.00833    0.00005
C5    1    0.057063    0.843582    0.409585    11.00000    0.01924    0.01795 =
         0.02499   -0.00357   -0.01305    0.00274
AFIX  43
H5    2   -0.002294    0.827253    0.376786    11.00000   -1.20000
AFIX   0
C14   1    0.842275    1.013393    0.261396    11.00000    0.02027    0.02259 =
         0.01963   -0.01115   -0.01130    0.00339
AFIX  43
H14   2    0.836664    0.927100    0.290449    11.00000   -1.20000
AFIX   0
C15   1    0.606010    0.677181    0.361946    11.00000    0.01371    0.01340 =
         0.01039   -0.00091   -0.00400    0.00186
C4    1    0.019844    0.815641    0.499626    11.00000    0.01729    0.01281 =
         0.02640   -0.00178   -0.00422    0.00150
AFIX  43
H4    2   -0.064935    0.782025    0.527407    11.00000   -1.20000
AFIX   0
C23   1    0.832521    0.906121    0.049628    11.00000    0.02621    0.01445 =
         0.01579    0.00046   -0.00829   -0.00608
AFIX  43
H23   2    0.830533    0.966472    0.000234    11.00000   -1.20000
AFIX   0
C12   1    0.979899    1.180712    0.174118    11.00000    0.02186    0.05430 =
         0.01673   -0.00798   -0.00334   -0.01221
AFIX  43
H12   2    1.066404    1.205956    0.141295    11.00000   -1.20000
AFIX   0
C3    1    0.107808    0.837400    0.548277    11.00000    0.02398    0.01345 =
         0.01868   -0.00172   -0.00517    0.00246
AFIX  43
H3    2    0.083506    0.817144    0.608982    11.00000   -1.20000
AFIX   0
C27   1    0.125843    0.431195    0.319569    11.00000    0.02473    0.02576 =
         0.01613    0.00306   -0.00750   -0.00779
AFIX  43
H27   2    0.041055    0.428008    0.362187    11.00000   -1.20000
AFIX   0
C33   1    0.492491    0.238046    0.089709    11.00000    0.02729    0.01253 =
         0.02001   -0.00338   -0.01363    0.00470
AFIX  43
H33   2    0.530970    0.168388    0.053997    11.00000   -1.20000
AFIX   0
C24   1    0.954632    0.825189    0.054630    11.00000    0.01919    0.02326 =
         0.01626   -0.00672    0.00008   -0.00589
AFIX  43
H24   2    1.035509    0.832181    0.009054    11.00000   -1.20000
AFIX   0
C26   1    0.193792    0.547145    0.300782    11.00000    0.01844    0.01896 =
         0.01589   -0.00282   -0.00579    0.00057
AFIX  43
H26   2    0.152824    0.620809    0.332481    11.00000   -1.20000
AFIX   0
C18   1    0.699147    0.483305    0.480358    11.00000    0.02544    0.01406 =
         0.01498    0.00181   -0.00821    0.00430
AFIX  43
H18   2    0.731799    0.418245    0.519616    11.00000   -1.20000
AFIX   0
C25   1    0.957132    0.734420    0.126632    11.00000    0.01652    0.01951 =
         0.02286   -0.00450   -0.00548    0.00447
AFIX  43
H25   2    1.039317    0.678773    0.129132    11.00000   -1.20000
AFIX   0
C34   1    0.375540    0.223254    0.155071    11.00000    0.03085    0.01151 =
         0.02420   -0.00120   -0.01789   -0.00241
AFIX  43
H34   2    0.336895    0.141975    0.165448    11.00000   -1.20000
AFIX   0
C19   1    0.649667    0.444766    0.414832    11.00000    0.02695    0.01074 =
         0.02225   -0.00053   -0.00804    0.00106
AFIX  43
H19   2    0.648189    0.353762    0.410061    11.00000   -1.20000
AFIX   0
C32   1    0.558227    0.358807    0.074408    11.00000    0.02117    0.01265 =
         0.01698   -0.00218   -0.01446    0.00318
C10   1    0.733413    1.234248    0.228473    11.00000    0.02257    0.02196 =
         0.01661   -0.00090   -0.00973    0.00062
AFIX  43
H10   2    0.653433    1.296253    0.233527    11.00000   -1.20000
AFIX   0
C28   1    0.186051    0.323005    0.274337    11.00000    0.02799    0.01720 =
         0.02057    0.00298   -0.01131   -0.00786
AFIX  43
H28   2    0.144058    0.243436    0.287399    11.00000   -1.20000
AFIX   0
C20   1    0.602649    0.541841    0.356752    11.00000    0.02096    0.01321 =
         0.01745   -0.00191   -0.00752    0.00055
AFIX  43
H20   2    0.568033    0.515810    0.313278    11.00000   -1.20000
AFIX   0
C11   1    0.861661    1.273577    0.183226    11.00000    0.03625    0.03640 =
         0.01694    0.00530   -0.01135   -0.01448
AFIX  43
H11   2    0.868911    1.362303    0.158824    11.00000   -1.20000
AFIX   0
HKLF 4

REM  msb-bc-06_mo_a.res in P-1
REM R1 =  0.0470 for    4560 Fo > 4sig(Fo)  and  0.0539 for all    5182 data
REM    415 parameters refined using      0 restraints

END

WGHT      0.0772      1.2183

REM Highest difference peak  0.854,  deepest hole -1.303,  1-sigma level  0.101
Q1    1   0.5224  0.6905  0.1676  11.00000  0.05    0.85
Q2    1   0.3311  0.7635  0.2393  11.00000  0.05    0.84
Q3    1   0.4312  0.7949  0.1526  11.00000  0.05    0.65
Q4    1   0.4166  0.6618  0.2576  11.00000  0.05    0.64
Q5    1   0.4101  0.8617  0.0912  11.00000  0.05    0.60
Q6    1   0.4633  0.8338  0.3150  11.00000  0.05    0.57
Q7    1   0.5638  0.7256  0.3237  11.00000  0.05    0.54
Q8    1   0.3233  0.9599  0.0846  11.00000  0.05    0.53
Q9    1   0.6469  0.7780  0.2402  11.00000  0.05    0.52
Q10   1   0.2222  0.9201  0.1617  11.00000  0.05    0.51
Q11   1   0.4657  0.8170  0.1986  11.00000  0.05    0.49
Q12   1   0.3797  0.6313  0.2095  11.00000  0.05    0.48
Q13   1   0.3609  0.9804  0.1180  11.00000  0.05    0.48
Q14   1   0.5360  0.8860  0.3035  11.00000  0.05    0.46
Q15   1   0.5622  0.8686  0.2244  11.00000  0.05    0.41
Q16   1   0.6521  1.0739  0.2884  11.00000  0.05    0.41
Q17   1   0.7609  0.9151  0.0935  11.00000  0.05    0.40
Q18   1   0.4822  0.2002  0.1372  11.00000  0.05    0.37
Q19   1   0.5490  1.0336  0.3152  11.00000  0.05    0.37
Q20   1   0.6532  0.5589  0.0919  11.00000  0.05    0.36
;
_shelx_res_checksum   20788

_shelx_hkl_file
;
   0   0  -3 2006.80   22.93
   0   0  -3 2032.33   15.20
   0   0   3 2031.04   23.37
   0   0  -4   -0.34    1.16
   0   0   4    0.70    1.19
   0   0  -4    1.34    1.37
   0   0  -5  515.76    9.66
   0   0  -5  511.93   14.95
   0   0   5  550.49   11.04
   0   0   6   56.11    4.02
   0   0  -6   54.25    5.64
   0   0   6   45.32    5.10
   0   0  -6   57.91    3.68
   0   0   7  359.59   15.09
   0   0   7  369.08   11.09
   0   0  -7  372.02    9.84
   0   0  -7  356.39   15.29
   0   0  -8   25.74    4.51
   0   0   8   29.33    3.70
   0   0  -8   27.08    2.84
   0   0   8   31.85    5.39
   0   0  -9    5.54    1.90
   0   0  -9    5.20    2.83
   0   0   9   11.95    3.30
   0   0  10 1644.44   31.48
   0   0 -10 1398.62   37.80
   0   0 -11   -2.47    3.30
   0   0  11    5.23    3.44
   0   0  12  791.90   24.00
   0   0 -12  975.29   34.93
   0   0  13  542.55   21.02
   0   0 -13 1241.26   41.44
   0   0  14   73.17    8.78
   0   0 -14  386.94   24.43
   0   0 -15  575.96   22.22
   0   0 -15  751.17   36.08
   0   0 -16  314.59   24.56
   0   0 -16  233.78   15.10
   0   0 -17    6.10    6.53
   0   0 -18    6.35    8.00
   0   0 -19  159.46   20.99
   0   0 -20   12.02   11.24
   0   0 -21   32.32   14.54
   0   1 -21   92.63   18.67
   0   1 -20   82.46   16.81
   0   1 -19    4.91    7.19
   0   1 -18  152.34   19.92
   0   1 -17  177.98   14.92
   0   1 -17  171.60   20.20
   0   1 -16   14.63    7.14
   0   1 -15   15.73    6.75
   0   1 -14  804.86   36.02
   0   1 -13  664.90   31.34
   0   1 -12  500.82   25.77
   0   1 -11 1190.28   37.01
   0   1 -10  499.23   22.82
   0   1 -10  309.09    8.66
   0   1  -9   11.11    2.24
   0   1  -9   14.99    4.56
   0   1  -8  227.59    7.69
   0   1  -8  255.22   14.92
   0   1  -7  202.00    7.14
   0   1  -7  195.74   12.07
   0   1  -6  856.97   22.88
   0   1  -6  874.94   14.15
   0   1  -5   74.41    6.53
   0   1  -5   79.15    4.27
   0  -1   5   85.67    3.82
   0   1  -4  403.58    9.15
   0  -1   4  443.16    8.62
   0   1  -4  441.28   14.52
   0  -1   3   -0.20    0.44
   0   1  -3    6.27    1.58
   0   1  -2  994.55   13.14
   0  -1   2  980.39   12.78
   0  -1   0  231.15    5.85
   0   1   0  233.99    5.35
   0  -1  -1  446.01    7.99
   0  -1  -1  471.47    8.57
   0  -1  -1  411.29    7.11
   0  -1  -2  103.25    4.65
   0   1   2   -0.20    0.32
   0  -1  -2  107.52    3.88
   0  -1  -2  104.85    4.57
   0   1   2   28.75    2.49
   0   1   2    0.20    0.41
   0  -1  -3   27.19    1.98
   0   1   3   -0.46    0.67
   0   1   3   -0.26    1.02
   0  -1  -3   23.28    3.05
   0  -1  -3   19.98    2.47
   0   1   3   -0.37    0.44
   0   1   4 1463.10   20.74
   0  -1  -4 1515.13   19.94
   0  -1  -4 1434.43   22.75
   0  -1  -4 1467.97   13.42
   0  -1  -4 1367.20   13.27
   0  -1  -5   26.63    2.12
   0   1   5   28.94    3.54
   0  -1  -5   36.53    3.62
   0  -1  -5   24.40    3.53
   0   1   5   32.51    4.02
   0   1   6   15.41    3.45
   0  -1  -6   10.78    1.79
   0   1   6   12.26    2.87
   0  -1  -6   11.35    3.40
   0  -1  -6    9.45    2.30
   0  -1  -7   99.92    5.30
   0  -1  -7  111.38    8.56
   0  -1  -7  108.54    6.79
   0   1   7  106.66    7.00
   0   1   7  109.24    8.13
   0  -1  -8   21.43    3.49
   0   1   8   20.85    4.49
   0  -1  -8   21.15    3.08
   0   1   8   32.39    4.62
   0  -1  -8   29.83    5.16
   0  -1  -9  670.92   24.13
   0  -1  -9  594.48   16.31
   0  -1  -9  549.04   14.12
   0   1   9  710.37   20.29
   0  -1 -10   62.06    5.39
   0  -1 -10   66.56    8.68
   0   1  10   58.84    6.79
   0  -1 -10   52.78    5.40
   0  -1 -11  576.48   25.50
   0  -1 -11  510.40   15.78
   0   1  12   73.82    8.57
   0  -1 -12   82.67   10.67
   0  -1 -12   81.21    7.02
   0  -1 -13 1337.36   42.49
   0  -1 -13 1233.80   28.01
   0   1  14 1777.64   43.59
   0  -1 -14 1670.96   34.13
   0   1  15   -4.52    4.91
   0  -1 -15   -0.25    5.87
   0  -1 -15    9.53    4.83
   0  -1 -16   51.24   11.87
   0  -1 -17   14.91    7.58
   0  -1 -18    6.93    7.97
   0  -1 -19   12.82    8.77
   0  -1 -20   62.39   15.57
   0  -1 -21    7.34   10.87
   0   2 -21  117.75   21.35
   0   2 -20   20.04   11.12
   0   2 -19   50.18   13.69
   0   2 -18   73.00   14.53
   0   2 -17  187.61   21.00
   0   2 -16   36.16    9.75
   0   2 -15   52.84   10.70
   0   2 -14   38.01   10.19
   0   2 -13  276.53   10.93
   0   2 -13  513.26   28.20
   0   2 -12  144.42   14.36
   0   2 -12  153.01    8.97
   0   2 -11  557.00   27.26
   0   2 -11  585.09   16.94
   0   2 -10  703.56   18.38
   0   2 -10  670.81   28.49
   0   2  -9  136.38    8.52
   0   2  -9  157.65   12.87
   0   2  -8   79.57    9.06
   0   2  -8   95.88    6.85
   0  -2   7 1287.28   19.82
   0   2  -7 1230.73   32.54
   0   2  -7 1251.69   23.14
   0   2  -6  508.06   20.05
   0  -2   6  499.23   12.44
   0   2  -6  465.48   13.82
   0  -2   5 1156.22   19.02
   0   2  -5 1098.88   20.69
   0   2  -4 1416.70   22.70
   0  -2   4 1409.31   21.00
   0   2  -3 1634.25   24.10
   0   2  -3 1596.05   15.11
   0  -2   2  318.82   10.15
   0   2  -2  301.31   10.18
   0   2  -2  304.34    7.37
   0  -2   1  867.20   16.40
   0   2  -1  877.23   16.94
   0   2  -1  889.44   13.72
   0  -2   0 1124.04   16.55
   0  -2   0 1121.90   18.27
   0   2   0 1117.10   18.41
   0   2   0 1111.20   16.48
   0   2   1  464.79   11.56
   0  -2  -1  477.63   11.75
   0  -2  -1  505.40   11.99
   0   2   2   -0.06    0.78
   0   2   2    0.59    0.79
   0   2   3   -0.67    1.39
   0  -2  -4   26.44    3.82
   0  -2  -4   16.47    3.40
   0   2   4   22.10    3.56
   0   2   4   27.34    4.25
   0   2   4   22.07    3.09
   0   2   5 1939.98   30.80
   0  -2  -5 1902.02   28.32
   0   2   5 2019.73   30.53
   0   2   5 2073.46   26.14
   0  -2  -5 2002.64   31.90
   0  -2  -5 2080.94   23.23
   0  -2  -6  202.04    6.11
   0  -2  -6  226.36   10.42
   0   2   6  208.64    8.50
   0   2   6  206.46   10.57
   0  -2  -6  224.65   12.01
   0  -2  -6  220.38    7.46
   0   2   6  219.19   10.97
   0  -2  -7   72.31    7.56
   0   2   7   45.76    4.39
   0  -2  -7   72.55    4.27
   0   2   7   71.26    6.86
   0  -2  -7   72.19    4.26
   0   2   7   70.74    6.68
   0  -2  -7   58.55    5.86
   0   2   8 3035.26   45.23
   0  -2  -8 2949.51   39.90
   0  -2  -8 2871.94   28.86
   0  -2  -8 2922.41   48.76
   0   2   8 2889.17   43.03
   0  -2  -9   11.53    1.47
   0  -2  -9   17.64    2.92
   0   2   9   18.79    4.74
   0  -2  -9   18.99    4.69
   0   2   9   15.32    3.42
   0  -2  -9   30.89    5.20
   0  -2 -10    9.09    5.10
   0  -2 -10   12.72    4.41
   0  -2 -10   16.16    3.29
   0   2  10   17.36    4.90
   0   2  11  380.75   18.04
   0  -2 -11  375.92   21.11
   0  -2 -11  371.91   13.12
   0  -2 -12  401.49   14.17
   0  -2 -12  438.37   24.24
   0   2  12  393.11   19.65
   0   2  13  242.40   16.35
   0  -2 -13  242.11   12.13
   0  -2 -13  233.83   19.46
   0   2  14 1039.44   34.96
   0  -2 -14 1121.09   42.97
   0  -2 -15  208.29   20.35
   0   2  15  177.82   16.29
   0   2  16  221.04   19.67
   0  -2 -16  286.22   23.96
   0  -2 -17  318.41   26.62
   0  -2 -18   93.49   16.26
   0  -2 -19  105.85   18.00
   0  -2 -20   37.10   14.98
   0   3 -20   41.56   14.45
   0   3 -19    6.88   10.01
   0   3 -18  405.70   32.71
   0   3 -17  194.96   22.53
   0   3 -16  635.70   37.56
   0   3 -15  307.72   25.20
   0   3 -14  182.93   18.54
   0   3 -13    7.74    5.76
   0   3 -13   12.12    5.05
   0   3 -12  137.63   15.29
   0   3 -12  129.87   10.63
   0   3 -11  352.04   22.77
   0   3 -11  402.55   17.40
   0   3 -10    9.72    5.09
   0   3 -10   -5.82    4.08
   0   3  -9  449.21   17.75
   0  -3   9  435.15   13.48
   0   3  -9  445.76   23.82
   0   3  -8  456.94   17.43
   0  -3   8  468.42   14.55
   0   3  -7   14.51    4.79
   0  -3   7   17.31    3.32
   0   3  -7   14.81    4.04
   0   3  -6  482.07   17.03
   0  -3   6  472.73   14.80
   0  -3   5 1905.61   29.31
   0   3  -5 1929.51   20.00
   0   3  -4  605.25   18.03
   0   3  -4  617.19   12.30
   0  -3   4  588.60   16.78
   0   3  -3 1749.78   29.95
   0   3  -3 1716.99   21.81
   0   3  -2 2218.70   26.18
   0   3  -2 2142.15   32.66
   0   3  -1  911.12   21.12
   0   3  -1  916.47   17.85
   0  -3   1  962.99   21.19
   0   3   0 1373.90   25.71
   0   3   0 1366.84   23.19
   0  -3   0 1375.60   24.71
   0   3   1   26.33    3.80
   0  -3  -1   25.76    3.67
   0  -3  -1   21.83    3.66
   0   3   1   32.19    4.32
   0   3   2  126.47    7.94
   0   3   2  141.71    8.40
   0  -3  -2  128.57    8.02
   0  -3  -2  130.90    7.81
   0   3   3 2896.96   35.51
   0   3   3 2849.34   36.99
   0  -3  -3 2776.62   34.04
   0   3   3 2756.07   37.66
   0   3   3 2775.96   33.09
   0  -3  -3 2729.62   36.25
   0  -3  -4 3230.71   40.34
   0  -3  -4 3132.58   36.12
   0   3   4 3248.43   33.21
   0   3   4 3146.69   41.79
   0   3   4 3117.76   39.06
   0   3   4 3118.61   38.58
   0  -3  -5   24.03    3.46
   0   3   5   19.87    2.41
   0   3   5   17.63    3.91
   0  -3  -5   19.77    3.45
   0   3   5   17.92    3.31
   0   3   5   24.54    4.46
   0  -3  -5   19.62    4.11
   0   3   6 1120.93   23.93
   0  -3  -6 1094.87   25.89
   0  -3  -6 1168.83   21.63
   0   3   6 1077.16   13.85
   0  -3  -6 1102.91   25.52
   0   3   6 1148.17   26.76
   0   3   6 1099.74   27.14
   0   3   7 2696.21   38.02
   0   3   7 2758.44   42.59
   0  -3  -7 2866.19   33.47
   0  -3  -7 2840.22   44.46
   0   3   7 2691.99   44.00
   0   3   8  328.61   13.51
   0  -3  -8  326.05   16.37
   0   3   8  329.39   15.65
   0   3   8  312.31   15.95
   0  -3  -8  346.04   11.31
   0   3   9 2783.40   48.39
   0  -3  -9 2742.87   49.76
   0  -3  -9 2764.22   30.17
   0   3   9 2738.81   46.50
   0   3  10  322.73   17.25
   0  -3 -10  324.42   18.50
   0   3  11  254.07   16.05
   0  -3 -11  295.04   18.96
   0  -3 -11  141.09    5.84
   0  -3 -11  198.50    6.44
   0   3  12  436.47   22.06
   0  -3 -12  446.79   24.57
   0   3  13  155.44   14.00
   0  -3 -13  155.71   15.93
   0  -3 -14  435.36   26.88
   0   3  14  445.83   23.84
   0   3  15   90.40   12.41
   0  -3 -15  115.35   16.19
   0  -3 -16 1047.92   45.20
   0   3  16  848.22   36.55
   0  -3 -17  457.29   32.25
   0  -3 -18  120.54   18.21
   0  -3 -19  245.42   27.00
   0   4 -20   18.21   13.80
   0   4 -19  103.31   19.32
   0   4 -18   20.73   11.84
   0   4 -17  681.60   41.80
   0   4 -16  111.89   17.17
   0   4 -15   70.01   13.84
   0   4 -14   87.99   14.48
   0   4 -13   26.59    6.99
   0   4 -13    8.46    5.02
   0   4 -12   39.16    7.48
   0   4 -12   47.04   10.62
   0   4 -11   77.28   12.04
   0   4 -11   76.38    9.46
   0   4 -10    2.46    4.82
   0   4 -10    3.29    4.61
   0   4  -9  214.15   14.58
   0   4  -9  221.54   18.09
   0   4  -8   51.49    9.04
   0   4  -8   29.19    5.94
   0   4  -7  756.15   14.73
   0   4  -7  830.22   26.13
   0   4  -6   82.39    8.35
   0   4  -6   95.24    5.67
   0  -4   6   77.34    7.20
   0   4  -5 4176.04   38.50
   0   4  -5 4081.14   55.81
   0   4  -4 3925.28   53.10
   0  -4   4 3894.90   49.40
   0   4  -4 4043.51   39.37
   0   4  -3 2610.70   33.37
   0   4  -3 2610.74   42.48
   0   4  -2 4028.65   43.23
   0   4  -2 3936.75   51.44
   0   4  -1    2.75    2.21
   0   4  -1    2.84    2.07
   0  -4   1    3.90    3.14
   0   4   0   61.33    6.06
   0   4   0   65.11    6.78
   0  -4   0   65.43    6.88
   0  -4  -1  388.69   15.22
   0   4   1  384.42   15.97
   0   4   1  347.64   14.17
   0   4   2 2533.28   41.72
   0  -4  -2 2609.02   37.37
   0   4   2 2650.95   39.57
   0  -4  -2 2591.75   38.57
   0  -4  -3  310.05   13.52
   0   4   3  319.10   15.99
   0   4   3  293.82   14.29
   0   4   3  294.53   13.85
   0   4   3  298.28   14.33
   0  -4  -4  101.04    8.83
   0   4   4  102.62    8.59
   0   4   4   96.05    8.60
   0   4   4  117.25    8.63
   0   4   4   94.00    8.54
   0   4   5    3.51    2.71
   0   4   5    5.08    2.89
   0   4   5    3.73    2.47
   0  -4  -5    3.50    2.71
   0   4   5    2.25    2.88
   0  -4  -6  794.25   21.18
   0   4   6  777.22   25.16
   0  -4  -6  801.58   21.83
   0   4   6  790.83   16.41
   0   4   6  802.44   23.44
   0   4   6  816.07   24.49
   0  -4  -7   -0.53    2.70
   0   4   7    1.63    2.48
   0   4   7    1.09    2.57
   0   4   7    0.28    1.11
   0   4   7    4.76    3.70
   0  -4  -7    4.00    3.96
   0   4   8 1856.90   37.29
   0  -4  -8 1806.27   37.34
   0   4   8 1836.06   41.41
   0   4   8 1785.98   37.80
   0  -4  -8 1949.20   32.37
   0  -4  -9    3.84    3.44
   0   4   9   12.33    4.24
   0  -4  -9    7.57    4.51
   0   4   9    0.17    3.52
   0   4   9    4.77    3.61
   0  -4 -10 1331.64   36.37
   0  -4 -10 1268.68   24.40
   0   4  10 1327.29   37.14
   0   4  11  686.89   27.85
   0  -4 -11  723.77   28.84
   0   4  12   14.51    5.41
   0  -4 -12   26.72    8.26
   0  -4 -12   12.47    3.23
   0  -4 -13   33.11    8.20
   0   4  13   26.28    7.53
   0   4  14   34.56    8.09
   0  -4 -14   24.95    8.71
   0  -4 -15   16.01    7.44
   0   4  15   16.25    6.35
   0   4  16   29.67   10.41
   0  -4 -16   50.39   13.16
   0  -4 -17   23.56   15.25
   0   4  17   33.97   10.49
   0  -4 -18  156.75   21.02
   0   5 -19    6.51   10.28
   0   5 -18  236.94   27.89
   0   5 -17    3.27    7.53
   0   5 -16  322.97   28.98
   0   5 -15  258.04   25.79
   0   5 -14   11.94    7.34
   0   5 -13  673.30   30.59
   0   5 -13  690.77   37.98
   0   5 -12   68.74   12.58
   0   5 -12   83.40   12.02
   0   5 -11   12.29    6.43
   0   5 -11   21.84    7.68
   0   5 -10  143.44   13.84
   0   5 -10  153.35   16.66
   0   5  -9  265.74   17.74
   0   5  -9  315.35   23.08
   0   5  -8  141.39   15.03
   0   5  -8  107.86    6.92
   0   5  -8  136.95   12.72
   0   5  -7    0.84    4.35
   0   5  -7    7.04    3.34
   0   5  -6  396.13   20.17
   0   5  -6  435.89   14.51
   0   5  -5  991.33   23.07
   0   5  -5  972.59   30.70
   0   5  -4  435.85   20.48
   0   5  -4  463.94   16.11
   0   5  -3 1430.73   36.05
   0   5  -3 1415.85   28.37
   0   5  -2  192.69   10.88
   0   5  -2  197.02   13.57
   0   5  -1  728.34   21.63
   0   5  -1  750.93   25.76
   0  -5   0  883.12   22.95
   0   5   0  879.40   28.04
   0   5   0  919.44   24.82
   0   5   1  220.75   14.16
   0   5   1  226.53   12.69
   0   5   2    4.60    2.59
   0   5   2    5.39    3.10
   0   5   3   90.53    9.14
   0   5   3  184.04   15.96
   0   5   3  112.39    9.93
   0   5   3  178.10   14.28
   0   5   4   60.69    7.68
   0   5   4   68.39    8.17
   0   5   4   69.52    9.65
   0   5   4   66.06    9.73
   0   5   5  245.88   15.16
   0   5   5  232.49   14.25
   0   5   5  261.47   15.76
   0   5   6  112.54   10.64
   0   5   6   99.89    9.70
   0   5   6  131.30   10.90
   0   5   6   96.38   10.07
   0   5   7  191.78   13.99
   0   5   7  211.93   14.81
   0   5   7  217.92   10.21
   0   5   7  205.92   13.82
   0  -5  -8   25.11    4.96
   0   5   8   26.54    6.36
   0   5   8   26.46    3.16
   0   5   8   44.74    7.94
   0   5   8   37.56    6.34
   0   5   9 1388.48   36.63
   0   5   9 1356.16   39.83
   0  -5  -9 1457.45   35.77
   0  -5 -10  644.02   25.00
   0  -5 -10  596.89   19.69
   0   5  10  654.91   25.41
   0   5  10  618.17   27.69
   0   5  11  365.76   19.92
   0  -5 -11  528.70   23.67
   0   5  11  487.66   24.80
   0  -5 -11  424.26   16.27
   0  -5 -12 1160.99   36.85
   0   5  12 1159.99   39.47
   0   5  13    3.24    4.33
   0  -5 -13   13.92    6.42
   0  -5 -14   67.37   10.54
   0   5  14   72.84   11.63
   0  -5 -15  108.75   14.09
   0   5  15  101.48   13.56
   0   5  16    3.17    6.28
   0  -5 -16   -4.57    7.43
   0   5  17    0.93    6.15
   0   6 -18   37.59   13.97
   0   6 -17  117.74   20.30
   0   6 -16    8.84    9.06
   0   6 -15   37.11   11.90
   0   6 -14   77.63   14.39
   0   6 -13   42.56   11.18
   0   6 -13   46.80   11.35
   0   6 -12   44.62   10.23
   0   6 -12   44.04   11.15
   0   6 -11  746.87   38.86
   0   6 -11  706.16   33.96
   0   6 -10  130.83   14.67
   0   6 -10  153.70   18.26
   0   6  -9  292.29   23.39
   0   6  -9  312.17   12.25
   0   6  -8  188.43   16.80
   0   6  -8  157.27    9.80
   0   6  -7    3.64    5.57
   0   6  -7    4.25    3.64
   0   6  -6  592.73   27.25
   0   6  -6  598.85   20.61
   0   6  -5   76.77   10.36
   0   6  -5   72.34    7.79
   0   6  -4   74.63    9.79
   0   6  -4   77.80    7.92
   0   6  -3  503.33   19.89
   0   6  -3  471.87   23.62
   0   6  -2 2601.05   44.90
   0   6  -2 2658.72   54.23
   0   6  -1   23.49    4.82
   0   6  -1   39.17    7.21
   0   6   0  494.67   23.46
   0   6   0  476.76   20.28
   0   6   1 1879.36   40.88
   0   6   1 2020.60   46.79
   0   6   2  209.83   15.42
   0   6   2  218.42   14.37
   0   6   3  340.47   18.45
   0   6   3  360.89   20.14
   0   6   4  749.43   28.73
   0   6   4  777.53   28.69
   0   6   5  328.14   21.43
   0   6   5  310.71   18.37
   0   6   5  401.34   27.26
   0   6   5  237.44   16.09
   0   6   6  251.67   17.03
   0   6   6  241.22   16.28
   0   6   6  214.98   17.26
   0   6   6  280.18   21.42
   0   6   7    1.09    4.03
   0   6   7    2.00    3.87
   0   6   7    4.15    4.46
   0   6   8 1255.61   39.95
   0   6   8 1297.51   37.96
   0   6   8 1312.21   27.20
   0   6   9  179.63   14.76
   0   6   9  170.13   15.48
   0   6   9  145.42    7.10
   0   6  10 1750.07   45.12
   0  -6 -10 1751.50   39.60
   0   6  10 1659.14   48.68
   0   6  11   45.10    8.61
   0  -6 -11   74.71    9.78
   0   6  11   59.64   10.50
   0   6  12   57.46   10.70
   0  -6 -12   63.18    9.76
   0   6  12   41.62    8.52
   0  -6 -13  984.64   34.97
   0   6  13  930.98   38.97
   0   6  14   -3.49    5.19
   0  -6 -14   -3.77    7.04
   0  -6 -15   22.82    8.79
   0   6  15   16.11    8.13
   0   6  16   40.48   10.59
   0   6  17  191.45   21.11
   0   6  18   10.55    8.86
   0   7 -17   16.50   12.65
   0   7 -16  179.06   25.49
   0   7 -15   -4.14    7.84
   0   7 -14  445.89   34.88
   0   7 -13  678.35   41.35
   0   7 -13  669.96   37.48
   0   7 -12  191.72   20.47
   0   7 -12  224.94   23.73
   0   7 -11  100.88   15.53
   0   7 -11   91.89   15.00
   0   7 -10  577.31   32.24
   0   7 -10  627.47   37.52
   0   7  -9  367.51   25.19
   0   7  -9  441.96   30.39
   0   7  -8  320.81   23.43
   0   7  -8  350.14   16.82
   0   7  -7  352.83   24.16
   0   7  -7  371.45   18.10
   0   7  -6   69.64   11.32
   0   7  -6   61.03    8.29
   0   7  -5  637.27   24.22
   0   7  -5  572.29   29.31
   0   7  -4  899.06   28.55
   0   7  -4  801.02   33.98
   0   7  -3  158.79   15.60
   0   7  -3  137.58   11.71
   0   7  -2  140.68   12.19
   0   7  -2   99.98   12.06
   0   7  -1  180.01   15.77
   0   7  -1  158.49   12.99
   0   7   0  394.29   20.61
   0   7   0  444.70   24.48
   0   7   1  211.91   15.60
   0   7   1  239.04   17.98
   0   7   2 2071.59   52.45
   0   7   2 2036.35   47.78
   0   7   3 1090.69   38.24
   0   7   3 1101.96   35.98
   0   7   4    2.42    4.20
   0   7   4   12.05    5.39
   0   7   5 1629.51   45.71
   0   7   5 1754.85   46.44
   0   7   6   21.84    7.06
   0   7   6   22.77    5.97
   0   7   7  467.16   25.20
   0   7   7  477.43   25.84
   0   7   8   -2.80    4.36
   0   7   8   -1.97    4.94
   0   7   8    4.32    5.58
   0   7   9  128.80   14.71
   0   7   9  130.24   13.84
   0   7  10   24.50    7.07
   0   7  10   22.10    7.34
   0   7  11  537.41   28.67
   0   7  11  513.51   29.44
   0   7  12  484.55   27.97
   0   7  12  495.18   29.39
   0   7  13   20.78    7.70
   0   7  13    5.14    7.00
   0   7  14  257.23   22.99
   0   7  15  275.14   24.42
   0   7  16  109.31   16.76
   0   7  17  165.93   21.33
   0   7  18  151.62   21.70
   0   8 -15   -8.90    9.17
   0   8 -14  108.72   19.61
   0   8 -13   22.15   10.91
   0   8 -12   33.13   13.34
   0   8 -12   29.34   10.43
   0   8 -11  206.46   22.57
   0   8 -11  183.43   21.94
   0   8 -10   20.23    8.51
   0   8 -10   20.74    9.56
   0   8  -9  812.08   43.09
   0   8  -9  822.96   40.98
   0   8  -8 1005.58   32.77
   0   8  -8 1060.42   45.53
   0   8  -7  142.00   13.47
   0   8  -7  154.67   17.99
   0   8  -6  407.42   27.69
   0   8  -6  419.45   22.02
   0   8  -5   34.03    6.78
   0   8  -5   22.82    8.82
   0   8  -4  341.88   24.36
   0   8  -4  358.64   20.64
   0   8  -3  107.81   11.71
   0   8  -3  101.50   14.09
   0   8  -2    3.19    6.68
   0   8  -2   -1.37    4.19
   0   8  -1    9.39    6.82
   0   8  -1    1.30    3.93
   0   8   0    1.41    5.41
   0   8   0   -0.92    5.68
   0   8   1  864.07   33.37
   0   8   1  937.33   39.07
   0   8   2 1526.57   44.98
   0   8   2 1498.11   49.16
   0   8   3  245.85   20.09
   0   8   3  250.45   18.62
   0   8   4 1307.77   42.60
   0   8   4 1235.56   44.35
   0   8   5   75.52   12.03
   0   8   5   71.92   11.54
   0   8   6  667.82   32.27
   0   8   6  703.11   33.46
   0   8   7  161.57   16.68
   0   8   7  148.68   16.41
   0   8   8   27.26    8.76
   0   8   8   55.70   10.60
   0   8   9  412.83   25.96
   0   8   9  395.62   26.87
   0   8  10  197.99   19.25
   0   8  10  177.22   18.67
   0   8  11  134.43   15.68
   0   8  11   97.62   14.61
   0   8  12  118.92   15.56
   0   8  12  136.70   17.10
   0   8  13   34.12   10.35
   0   8  13   17.74   10.72
   0   8  14  121.87   17.09
   0   8  15  126.00   18.26
   0   8  16  452.40   33.85
   0   8  17   37.86   12.96
   0   8  18  146.11   22.64
   0   8  19   79.78   16.74
   0   9 -14   71.57   17.37
   0   9 -13   24.05   11.98
   0   9 -12   23.95   12.96
   0   9 -12   18.18   11.83
   0   9 -11    1.15    8.52
   0   9 -11   -7.78    8.59
   0   9 -10  372.52   31.75
   0   9 -10  452.85   35.77
   0   9  -9   89.14   16.30
   0   9  -9  107.54   17.09
   0   9  -8  936.63   46.48
   0   9  -7  259.63   24.15
   0   9  -7  244.22   18.83
   0   9  -6  237.22   22.98
   0   9  -6  282.32   20.16
   0   9  -5  162.75   15.52
   0   9  -5  182.61   20.36
   0   9  -4  232.27   22.24
   0   9  -4  246.80   19.34
   0   9  -3  330.84   22.26
   0   9  -3  266.98   23.26
   0   9  -2    5.89    5.41
   0   9  -2   16.48    5.95
   0   9  -1   99.00   14.48
   0   9  -1  105.19   12.95
   0   9   0    2.69    5.28
   0   9   0   17.51    6.81
   0   9   1  170.09   17.97
   0   9   1  192.93   17.40
   0   9   2  214.35   18.16
   0   9   2  234.96   21.08
   0   9   3   14.60    6.92
   0   9   3   33.27    8.23
   0   9   4  354.68   24.47
   0   9   4  328.71   25.01
   0   9   5 1965.00   60.53
   0   9   5 1931.06   57.25
   0   9   6  344.73   25.00
   0   9   6  365.37   26.36
   0   9   7  832.25   39.75
   0   9   7  901.01   41.15
   0   9   8  931.34   42.36
   0   9   8  854.78   39.50
   0   9   9  182.67   19.21
   0   9   9  237.52   21.78
   0   9  10  144.19   17.24
   0   9  10  107.21   15.51
   0   9  11   11.14    8.31
   0   9  11    1.00    6.01
   0   9  12   42.65   12.62
   0   9  12   54.73   12.21
   0   9  13   10.54    8.30
   0   9  13   20.16   12.36
   0   9  14   21.67   11.12
   0   9  15  123.78   18.71
   0   9  16   -3.39    8.52
   0   9  17   61.10   15.68
   0   9  18   25.27   12.30
   0  10 -12   71.06   18.29
   0  10 -12   55.16   15.21
   0  10 -11   98.07   20.24
   0  10 -11  113.34   21.27
   0  10 -10   31.19   13.44
   0  10 -10   27.47   12.70
   0  10  -9 1252.76   60.71
   0  10  -9 1317.01   63.68
   0  10  -8   85.07   17.03
   0  10  -7  317.40   29.63
   0  10  -6  444.14   33.65
   0  10  -6  489.59   29.29
   0  10  -5   24.56    8.40
   0  10  -5   29.68    9.90
   0  10  -4  237.60   20.36
   0  10  -4  201.75   21.84
   0  10  -3  275.29   25.10
   0  10  -3  330.76   23.64
   0  10  -2   25.52    9.43
   0  10  -2   27.18    8.36
   0  10  -1  309.99   23.48
   0  10  -1  288.29   25.47
   0  10   0  202.61   21.24
   0  10   0  228.96   20.23
   0  10   1   74.11   13.08
   0  10   1   77.99   12.54
   0  10   2   16.40    7.82
   0  10   2   21.09   13.57
   0  10   3   56.64   11.90
   0  10   3   59.21   11.19
   0  10   4  867.93   40.65
   0  10   4  875.94   43.52
   0  10   5  320.59   25.35
   0  10   5  348.45   27.39
   0  10   6  643.70   36.16
   0  10   6  728.73   39.88
   0  10   7   14.83    7.90
   0  10   7    1.14    6.64
   0  10   8  487.44   32.87
   0  10   8  454.22   31.23
   0  10   9  126.06   17.23
   0  10   9  123.75   17.01
   0  10  10   -6.12    6.31
   0  10  10    5.94    9.20
   0  10  11    7.11    8.76
   0  10  11    5.24    6.68
   0  10  12   79.17   14.80
   0  10  12   89.51   16.09
   0  10  13  235.24   25.88
   0  10  14  297.66   29.61
   0  10  15   14.65    9.50
   0  10  16   28.61   12.01
   0  11 -11   61.69   20.17
   0  11 -10  131.94   24.60
   0  11 -10  115.60   22.20
   0  11  -9   18.05   12.46
   0  11  -9   36.90   14.45
   0  11  -8   21.80   12.57
   0  11  -8   36.59   15.35
   0  11  -7  152.14   23.59
   0  11  -6   10.12    8.98
   0  11  -5  344.55   31.86
   0  11  -5  344.22   26.92
   0  11  -4   14.62   10.55
   0  11  -4    1.27    6.81
   0  11  -3  145.60   20.29
   0  11  -3  124.92   16.90
   0  11  -2  127.28   16.37
   0  11  -2  129.96   19.44
   0  11  -1  408.47   32.64
   0  11  -1  416.06   28.81
   0  11   0  695.53   36.96
   0  11   0  586.80   38.97
   0  11   1  449.59   34.13
   0  11   1  472.87   31.17
   0  11   2    7.74    8.50
   0  11   2   12.77    6.53
   0  11   3  286.39   27.35
   0  11   3  323.71   26.27
   0  11   4   13.54    7.37
   0  11   4   11.13    6.75
   0  11   5  181.03   20.50
   0  11   5  212.13   23.45
   0  11   6   -5.76    8.09
   0  11   6   14.10    9.15
   0  11   7  138.88   19.40
   0  11   7  128.69   18.31
   0  11   8  297.17   27.88
   0  11   8  255.22   25.08
   0  11   9   17.74   10.27
   0  11   9   31.27   10.38
   0  11  10  104.74   18.15
   0  11  10  171.99   21.11
   0  11  11  130.27   20.02
   0  11  11  122.03   18.82
   0  11  12   -0.61   10.24
   0  11  12    6.15    9.41
   0  11  13 1132.03   57.89
   0  11  14    2.33    8.41
   0  12 -10  258.62   36.38
   0  12  -9    3.19   12.30
   0  12  -8  137.93   26.32
   0  12  -8   98.55   21.37
   0  12  -7    9.53   10.97
   0  12  -6   91.70   20.39
   0  12  -5   35.82   14.31
   0  12  -4   49.59   15.06
   0  12  -4   62.09   14.72
   0  12  -3  137.66   18.57
   0  12  -3  157.87   23.20
   0  12  -2   26.11   12.26
   0  12  -2    8.53    6.96
   0  12  -1  491.67   33.13
   0  12  -1  510.59   39.37
   0  12   0  177.57   23.82
   0  12   0  185.46   20.48
   0  12   1  395.80   34.55
   0  12   1  343.96   28.27
   0  12   2  926.18   45.72
   0  12   2  906.33   51.23
   0  12   3   13.70    7.91
   0  12   3   17.93    9.83
   0  12   4  292.41   29.32
   0  12   4  283.32   25.81
   0  12   5   18.81    9.04
   0  12   5   33.53   11.72
   0  12   6   -1.27    7.84
   0  12   6    6.15    7.99
   0  12   7   23.86   12.28
   0  12   7   25.82    9.30
   0  12   8   84.37   17.43
   0  12   8   87.69   18.53
   0  12   9   16.77   12.43
   0  12   9   -3.76    9.35
   0  12  10    5.95    9.36
   0  12  10   -6.87    9.11
   0  12  11  271.03   29.89
   0  12  11  306.40   31.44
   0  12  12   60.54   16.38
   0  13  -5   73.48   18.63
   0  13  -4   81.51   19.49
   0  13  -3   62.23   18.05
   0  13  -3   51.70   14.67
   0  13  -2   37.03   13.79
   0  13  -2   29.97   12.58
   0  13  -1   10.50   10.37
   0  13  -1    9.46   11.97
   0  13   0  161.33   24.74
   0  13   0  223.50   25.23
   0  13   1  461.78   34.70
   0  13   1  430.18   39.23
   0  13   2   90.84   17.23
   0  13   2  134.05   22.98
   0  13   3 1264.66   65.28
   0  13   3 1230.95   56.44
   0  13   4   42.70   12.37
   0  13   4   25.24   12.51
   0  13   5  134.98   21.89
   0  13   5  117.56   18.96
   0  13   6   -0.24    8.81
   0  13   6    8.71   12.17
   0  13   7   13.88   11.78
   0  13   7   13.37    9.19
   0  13   8   10.33   11.53
   0  13   8   17.11   11.45
   0  13   9   11.58   11.84
   0  13  10   41.28   14.08
   0  13  11    3.01   11.61
   0  14  -1  185.45   26.86
   0  14   0   -1.12   10.11
   0  14   1  207.45   26.46
   0  14   2  365.31   33.77
   0  14   3   30.70   13.39
  -1  14   1  143.42   24.00
  -1  14   0   89.42   18.33
  -1  14  -1   44.75   13.87
  -1  13  10   -7.78   12.72
  -1  13   9   13.75   12.56
  -1  13   8   77.07   18.28
  -1  13   7   11.98   10.08
  -1  13   7    1.70   11.57
  -1  13   6    7.57    9.89
  -1  13   6    2.16    8.67
  -1  13   5  295.78   29.55
  -1  13   5  306.38   32.94
  -1  13   4    9.52    8.51
  -1  13   4   -2.43    9.00
  -1  13   3  170.04   25.72
  -1  13   3  171.83   22.36
  -1  13   2   92.88   20.23
  -1  13   2   97.10   17.27
  -1  13   1  268.27   30.55
  -1  13   1  226.38   24.62
  -1  13   0   42.24   12.73
  -1  13   0   39.09   14.11
  -1  13  -1   16.99    9.97
  -1  13  -1   21.95   13.43
  -1  13  -2   39.50   12.80
  -1  13  -2   43.73   15.13
  -1  13  -3   46.83   13.66
  -1  13  -3   54.17   16.10
  -1  13  -4    3.52   10.54
  -1  12  11  146.96   23.77
  -1  12  10   -2.85   10.29
  -1  12  10   19.83   11.90
  -1  12   9   11.11    9.26
  -1  12   9   14.18   10.47
  -1  12   8    5.17   10.33
  -1  12   8    9.33   10.41
  -1  12   7   57.08   15.81
  -1  12   7   83.68   17.51
  -1  12   6    7.73   10.05
  -1  12   6   -0.22    7.55
  -1  12   5   54.51   14.00
  -1  12   5  101.22   17.62
  -1  12   4  243.69   27.25
  -1  12   4  254.27   25.49
  -1  12   3   32.40   11.33
  -1  12   3   43.97   11.75
  -1  12   2  373.24   29.39
  -1  12   2  361.03   32.39
  -1  12   1  301.57   26.67
  -1  12   1  242.31   26.72
  -1  12   0   40.78   10.74
  -1  12   0   80.89   16.93
  -1  12  -1  182.11   21.01
  -1  12  -1  139.82   21.37
  -1  12  -2  216.24   22.83
  -1  12  -2  183.70   23.91
  -1  12  -3   37.04   13.14
  -1  12  -3   21.18   10.38
  -1  12  -4   -3.56    7.70
  -1  12  -4   10.61   12.09
  -1  12  -5   32.57   12.90
  -1  12  -6   17.73   12.58
  -1  12  -7   87.97   19.63
  -1  12  -8  338.98   36.54
  -1  12  -9    4.76   12.15
  -1  12 -10  105.67   24.59
  -1  11  13   89.48   17.77
  -1  11  12   25.06   10.36
  -1  11  11    9.06    9.34
  -1  11  11   20.79   10.11
  -1  11  10   16.61    9.91
  -1  11  10   20.51    9.59
  -1  11   9  135.37   20.47
  -1  11   9  140.82   19.97
  -1  11   8  222.48   24.11
  -1  11   8  227.05   24.61
  -1  11   7  240.70   25.76
  -1  11   7  215.91   22.76
  -1  11   6   -2.94    6.35
  -1  11   6    6.64    6.69
  -1  11   5  274.72   25.27
  -1  11   5  300.78   27.60
  -1  11   4   34.57    9.78
  -1  11   4   32.95   10.98
  -1  11   3  146.06   20.03
  -1  11   3  135.98   17.76
  -1  11   2   34.57    9.23
  -1  11   2   36.59   10.76
  -1  11   1  416.69   28.57
  -1  11   1  448.87   33.86
  -1  11   0   95.19   16.62
  -1  11   0   95.79   14.11
  -1  11  -1   22.79    9.35
  -1  11  -1   10.21    6.66
  -1  11  -2  147.00   17.32
  -1  11  -2   96.49   16.11
  -1  11  -3  140.18   16.97
  -1  11  -3  123.99   18.85
  -1  11  -4   27.71    9.05
  -1  11  -4   10.62    7.83
  -1  11  -5   97.68   17.70
  -1  11  -5   80.33   13.86
  -1  11  -6  131.66   20.17
  -1  11  -7   57.99   14.66
  -1  11  -8   28.55   12.06
  -1  11  -9  160.83   25.18
  -1  11 -10  318.86   35.12
  -1  11 -10  265.65   32.45
  -1  11 -11   26.69   17.71
  -1  11 -12  559.92   49.34
  -1  10  16   58.92   16.42
  -1  10  15   80.46   17.42
  -1  10  14   13.36    9.99
  -1  10  13   43.22   12.93
  -1  10  12   84.40   16.46
  -1  10  12   92.58   16.04
  -1  10  11   68.76   14.06
  -1  10  11   84.14   16.04
  -1  10  10  162.90   20.61
  -1  10  10  173.37   20.96
  -1  10   9   89.43   15.16
  -1  10   9  101.21   16.35
  -1  10   8  715.14   39.54
  -1  10   8  762.04   40.27
  -1  10   7   93.19   14.37
  -1  10   7   67.64   13.10
  -1  10   6  885.52   43.56
  -1  10   6  788.38   39.45
  -1  10   5   10.62    6.49
  -1  10   5   -4.33    6.58
  -1  10   4  668.07   35.30
  -1  10   4  690.51   38.16
  -1  10   3   58.76   10.89
  -1  10   3   53.82   12.01
  -1  10   2   20.07    7.31
  -1  10   2   22.74    8.00
  -1  10   1    9.90    6.77
  -1  10   1    1.66    5.29
  -1  10   0    5.15    5.61
  -1  10   0    7.72    7.18
  -1  10  -1   12.65    8.74
  -1  10  -1    9.68    6.21
  -1  10  -2   11.75    6.19
  -1  10  -2   11.88    8.12
  -1  10  -3   11.15    7.35
  -1  10  -3   25.99    8.77
  -1  10  -4  805.44   35.75
  -1  10  -4  752.06   41.29
  -1  10  -5  265.55   25.44
  -1  10  -5  234.21   20.24
  -1  10  -6   80.25   15.41
  -1  10  -6   69.09   12.50
  -1  10  -7  244.86   25.56
  -1  10  -8   23.99   11.67
  -1  10  -9  333.21   31.18
  -1  10 -10    8.46    8.10
  -1  10 -11   22.80   12.87
  -1  10 -11   -5.34    9.93
  -1  10 -12   69.19   17.90
  -1  10 -12   58.72   18.16
  -1   9  18   14.83   13.13
  -1   9  17   29.72   13.18
  -1   9  16   -8.71    8.39
  -1   9  15   30.64   12.52
  -1   9  14    6.93    8.52
  -1   9  13    1.45    7.24
  -1   9  12    8.98    8.22
  -1   9  12   11.73    8.29
  -1   9  11   -3.11    6.37
  -1   9  11    0.73    7.25
  -1   9  10   97.15   15.01
  -1   9  10   95.12   14.85
  -1   9   9  266.72   23.46
  -1   9   9  290.67   24.44
  -1   9   8  105.19   14.34
  -1   9   8  102.57   14.45
  -1   9   7  585.37   32.67
  -1   9   7  520.90   30.72
  -1   9   6   40.98    9.72
  -1   9   6   34.50    8.80
  -1   9   5   79.16   12.57
  -1   9   5   81.08   12.88
  -1   9   4   82.20   12.31
  -1   9   4   87.20   13.27
  -1   9   3  161.15   16.08
  -1   9   3  134.21   16.21
  -1   9   2    8.32    4.30
  -1   9   2   10.73    5.77
  -1   9   1  115.33   13.53
  -1   9   1  134.34   15.88
  -1   9   0  302.81   23.66
  -1   9   0  287.96   20.27
  -1   9  -1  589.30   32.71
  -1   9  -1  536.74   27.30
  -1   9  -2  273.19   22.75
  -1   9  -2  280.54   19.77
  -1   9  -3  171.17   15.63
  -1   9  -3  193.81   20.13
  -1   9  -4   25.11    9.35
  -1   9  -4   30.27    7.67
  -1   9  -5  332.43   21.85
  -1   9  -5  284.63   23.92
  -1   9  -6  888.02   42.55
  -1   9  -6  892.65   34.70
  -1   9  -7  119.42   14.40
  -1   9  -7   95.71   14.90
  -1   9  -8  433.27   31.75
  -1   9  -9   62.09   14.19
  -1   9 -10   89.92   16.77
  -1   9 -11  136.96   20.84
  -1   9 -11  124.54   19.54
  -1   9 -12    2.34    9.03
  -1   9 -12    0.86    8.72
  -1   9 -13   29.59   14.70
  -1   9 -13   16.95   11.84
  -1   9 -14    6.47    8.72
  -1   8  18   87.92   17.51
  -1   8  17    6.91    9.69
  -1   8  16   -1.41    8.81
  -1   8  15   67.74   14.46
  -1   8  14   18.07    9.00
  -1   8  13   97.79   15.00
  -1   8  12  213.23   20.81
  -1   8  12  215.03   21.45
  -1   8  11  147.00   16.99
  -1   8  11  147.47   16.66
  -1   8  10  238.45   20.70
  -1   8  10  245.32   21.55
  -1   8   9  399.65   25.98
  -1   8   9  423.29   26.66
  -1   8   8  906.87   37.17
  -1   8   8  815.69   37.01
  -1   8   7    8.52    6.21
  -1   8   7   16.92    6.25
  -1   8   6  435.34   26.19
  -1   8   6  281.69   21.07
  -1   8   5 1126.08   40.63
  -1   8   5 1132.63   41.58
  -1   8   4  209.64   18.10
  -1   8   4  228.97   18.29
  -1   8   3  798.24   34.72
  -1   8   3  825.93   33.09
  -1   8   2  180.39   15.56
  -1   8   2  154.60   15.83
  -1   8   1  508.44   27.73
  -1   8   1  489.74   24.61
  -1   8   0   51.71    8.56
  -1   8   0   47.80    9.74
  -1   8  -1   16.24    6.80
  -1   8  -1   22.56    6.54
  -1   8  -2  308.76   18.70
  -1   8  -2  279.65   21.20
  -1   8  -3    6.85    4.64
  -1   8  -3   16.94    5.06
  -1   8  -4  476.31   27.63
  -1   8  -4  457.29   22.45
  -1   8  -5   -1.16    4.89
  -1   8  -5   -2.33    4.04
  -1   8  -6  176.19   14.53
  -1   8  -6  145.73   16.33
  -1   8  -7 1153.35   35.92
  -1   8  -7 1084.41   44.29
  -1   8  -8  134.43   17.00
  -1   8  -8  130.63   13.27
  -1   8  -9  258.39   23.18
  -1   8 -10   21.71    9.30
  -1   8 -11   -3.48    6.79
  -1   8 -11    5.12    7.17
  -1   8 -12    0.91    8.07
  -1   8 -12   16.01   11.11
  -1   8 -13   10.30   11.45
  -1   8 -13   10.75    9.46
  -1   8 -14   18.02   10.39
  -1   8 -15   20.87   12.01
  -1   8 -16  148.60   24.04
  -1   7  18   16.66   11.74
  -1   7  17   59.52   14.31
  -1   7  16   17.27   10.13
  -1   7  15    2.82    8.80
   1  -7 -14  108.51   14.10
  -1   7  14   80.35   13.17
  -1   7  13  180.41   18.48
   1  -7 -13  216.32   18.00
  -1   7  12    2.08    5.81
  -1   7  12  -11.24    7.72
  -1   7  11 1367.62   47.78
  -1   7  11 1205.63   42.03
  -1   7  10    9.76    6.18
  -1   7  10   -5.44    5.27
  -1   7   9  161.24   15.26
  -1   7   9  166.99   16.01
  -1   7   8    2.99    5.77
  -1   7   8   -7.65    5.24
  -1   7   7  776.23   32.68
  -1   7   7  754.91   31.43
  -1   7   6  131.57   13.52
  -1   7   6  120.53   13.07
  -1   7   5  699.39   29.30
  -1   7   5  714.34   30.16
  -1   7   4   21.12    6.24
  -1   7   4   34.02    7.62
  -1   7   3    3.00    4.32
  -1   7   3    1.96    3.78
  -1   7   2  124.05   11.93
  -1   7   2  122.14   12.65
  -1   7   1  372.68   22.05
  -1   7   1  376.51   19.91
  -1   7   0  101.61   11.84
  -1   7   0   98.81   10.30
  -1   7  -1  186.01   15.73
  -1   7  -1  153.16   12.10
  -1   7  -2  812.47   32.13
  -1   7  -2  862.94   28.40
  -1   7  -3  526.25   22.04
  -1   7  -3  499.39   25.77
  -1   7  -4   60.64    9.46
  -1   7  -4   61.56    7.92
  -1   7  -5  570.56   28.08
  -1   7  -5  624.15   23.61
  -1   7  -6   32.14    5.93
  -1   7  -6   39.48    9.33
  -1   7  -7  257.20   20.42
  -1   7  -7  292.19   16.05
  -1   7  -8  439.87   26.56
  -1   7  -8  505.68   21.10
  -1   7  -9   -1.32    4.14
  -1   7  -9   -5.89    6.08
  -1   7 -10  252.97   21.91
  -1   7 -11  132.88   16.70
  -1   7 -11  155.00   19.81
  -1   7 -12  148.38   19.79
  -1   7 -12  165.27   19.31
  -1   7 -13   39.32   11.42
  -1   7 -13   42.72   12.38
  -1   7 -14  379.13   33.32
  -1   7 -15  102.90   18.39
  -1   7 -16   28.09   12.05
  -1   7 -17   87.68   20.08
  -1   6  17    0.86    6.80
   1  -6 -16   15.92    9.97
  -1   6  16    9.75    8.91
   1  -6 -15  127.47   15.57
  -1   6  15  121.39   15.65
   1  -6 -14   18.60    8.12
  -1   6  14    7.72    6.40
   1  -6 -13  623.51   30.91
  -1   6  13  539.09   29.95
  -1   6  12   91.54   12.86
   1  -6 -12   88.21   12.03
  -1   6  12   64.45    9.46
  -1   6  11   41.74    8.88
  -1   6  11   31.59    7.11
   1  -6 -11   38.29    7.92
  -1   6  10  758.76   32.06
   1  -6 -10  794.91   30.46
  -1   6  10  741.56   29.35
  -1   6   9   70.83    9.51
  -1   6   9   65.38    9.78
   1  -6  -9   63.12    9.37
  -1   6   9   60.79    6.42
  -1   6   8  483.82   22.70
  -1   6   8  497.80   19.58
  -1   6   8  456.14   24.32
  -1   6   7  179.32   14.16
  -1   6   7  153.92   13.65
  -1   6   7  141.09   13.48
  -1   6   6  336.50   19.25
  -1   6   6  362.05   19.44
  -1   6   5   37.82   12.49
  -1   6   5   56.78    8.41
  -1   6   5   54.19    8.22
  -1   6   4  154.83   12.76
  -1   6   4  157.10   13.06
  -1   6   3 1723.44   40.83
  -1   6   3 1670.04   41.43
  -1   6   2  122.90   11.48
  -1   6   2  112.62   10.49
  -1   6   1   69.06    8.84
  -1   6   1   58.77    7.20
  -1   6   0 2010.32   45.36
  -1   6   0 1953.41   40.24
  -1   6  -1   99.35    9.04
  -1   6  -1   96.69   10.09
  -1   6  -2 1094.51   33.98
  -1   6  -2 1029.66   27.88
  -1   6  -3 1322.24   37.96
  -1   6  -3 1423.08   32.02
  -1   6  -4  343.73   15.59
  -1   6  -4  332.97   19.26
  -1   6  -5   60.58    7.02
  -1   6  -5   62.70    9.41
  -1   6  -6  574.25   26.06
  -1   6  -6  559.36   19.32
  -1   6  -7   35.88    5.82
  -1   6  -7   33.51    7.59
  -1   6  -8  215.25   12.06
  -1   6  -8  181.75   15.99
  -1   6  -9  138.83    9.87
  -1   6  -9  119.87   13.46
  -1   6 -10   55.28   10.09
  -1   6 -10   39.35    5.57
  -1   6 -11  167.12   16.53
  -1   6 -11  194.77   20.75
  -1   6 -12   50.19   12.35
  -1   6 -12   75.72   12.90
  -1   6 -13   73.74   13.32
  -1   6 -13   78.39   14.38
  -1   6 -14   -9.59    8.94
  -1   6 -15  132.96   19.41
  -1   6 -16   24.08   11.22
  -1   6 -17   21.45   11.76
  -1   6 -18   26.69   12.96
  -1   5  17   21.72   11.60
   1  -5 -17    2.79    8.91
   1  -5 -16    7.09    7.43
  -1   5  16   12.60    7.42
  -1   5  15    7.94    6.23
   1  -5 -15   -2.11    6.48
  -1   5  14  408.40   25.35
   1  -5 -14  423.51   27.32
   1  -5 -13  115.82   14.37
  -1   5  13  121.11   13.71
   1  -5 -12  147.47   15.31
  -1   5  12  118.37   13.31
   1  -5 -11  672.59   29.08
  -1   5  11  600.81   23.59
  -1   5  11  698.47   30.25
  -1   5  10    7.08    5.02
  -1   5  10   13.07    4.95
   1  -5 -10   10.72    6.62
   1  -5 -10   12.32    4.26
   1  -5  -9 1307.94   38.02
  -1   5   9 1241.54   33.22
  -1   5   9 1259.05   23.35
  -1   5   9 1193.29   36.92
  -1   5   8   -0.19    3.66
   1  -5  -8    6.65    4.76
  -1   5   8    5.26    3.54
  -1   5   8    3.55    3.18
  -1   5   7    2.99    3.14
  -1   5   7   -1.62    3.83
  -1   5   7    3.73    2.92
   1  -5  -7   -8.30    4.49
  -1   5   6  266.04   14.97
  -1   5   6  306.47   17.34
  -1   5   6  313.01   15.96
  -1   5   5    6.35    4.45
  -1   5   5    5.62    3.36
  -1   5   5    7.75    3.79
  -1   5   4   25.84    7.67
  -1   5   4   40.80    6.54
  -1   5   4   33.79    5.67
  -1   5   4   42.68    8.64
  -1   5   3   57.51   10.78
  -1   5   3   37.55    5.86
  -1   5   3   43.68    9.16
  -1   5   3   35.98    5.56
  -1   5   2  212.77   16.60
  -1   5   2  138.71   10.94
  -1   5   2  116.09    9.87
  -1   5   2  252.62   22.12
  -1   5   1 1369.64   33.75
  -1   5   1 1384.47   31.78
  -1   5   0    2.59    2.96
  -1   5   0    5.88    3.00
  -1   5  -1 2488.51   45.73
  -1   5  -1 2467.64   40.17
  -1   5  -2  376.22   15.34
  -1   5  -2  368.80   18.09
  -1   5  -3  973.64   23.99
  -1   5  -3  986.93   29.72
  -1   5  -4  862.26   21.99
  -1   5  -4  829.50   27.59
  -1   5  -5  310.43   12.90
  -1   5  -5  331.32   17.81
  -1   5  -6 2629.35   36.25
  -1   5  -6 2635.35   50.61
  -1   5  -7   88.05    6.97
  -1   5  -7   70.91    8.89
  -1   5  -8  245.78   16.65
  -1   5  -8  233.37   10.50
  -1   5  -9   14.60    3.42
  -1   5  -9   10.19    4.92
  -1   5 -10  100.15    6.08
  -1   5 -10  141.01   14.73
  -1   5 -10  147.26   14.08
  -1   5 -11   69.76   12.41
  -1   5 -11   51.20    8.45
  -1   5 -12    4.35    4.98
  -1   5 -12   -0.76    5.43
  -1   5 -13  481.80   32.39
  -1   5 -13  495.60   26.62
  -1   5 -14  309.02   21.35
  -1   5 -14  367.96   28.75
  -1   5 -15  235.18   24.55
  -1   5 -16  705.05   44.01
  -1   5 -17   -3.91   10.92
  -1   5 -18   34.96   12.55
  -1   5 -19   -1.64    8.95
   1  -4 -18    5.92    9.94
   1  -4 -17   83.04   15.70
  -1   4  16   21.18    8.18
   1  -4 -16   20.34    9.44
  -1   4  15  270.14   20.43
   1  -4 -15  278.27   23.56
  -1   4  14    1.32    4.34
   1  -4 -14   34.12   11.92
   1  -4 -13  514.27   29.39
  -1   4  13  449.69   24.06
   1  -4 -12  219.66   18.58
  -1   4  12  222.17   16.79
   1  -4 -11  369.67   22.33
  -1   4  11  332.82   19.66
  -1   4  10 1376.86   37.51
  -1   4  10 1092.70   27.85
   1  -4 -10 1482.18   42.46
   1  -4 -10 1220.46   22.00
   1  -4 -10 1120.97   22.00
  -1   4   9  108.44    9.22
  -1   4   9  108.12   10.67
   1  -4  -9   96.16    6.83
   1  -4  -9  116.64    7.29
   1  -4  -9  119.46   12.21
   1  -4  -8 1115.11   22.23
   1  -4  -8 1180.53   34.54
  -1   4   8 1133.56   27.08
   1  -4  -8 1095.31   23.05
  -1   4   8 1133.64   31.80
  -1   4   7 1036.31   29.58
   1  -4  -7 1083.35   30.92
  -1   4   7 1036.00   25.88
   1  -4  -7 1075.25   23.35
   1  -4  -7 1074.93   22.19
  -1   4   7 1082.31   21.65
  -1   4   6  914.14   21.65
  -1   4   6  837.22   29.03
  -1   4   6  962.55   24.62
   1  -4  -6  957.68   22.41
   1  -4  -6  974.45   28.63
  -1   4   6  924.60   27.06
   1  -4  -6  915.89   21.30
  -1   4   5    3.23    2.27
  -1   4   5    2.93    2.65
   1  -4  -5    5.96    3.71
  -1   4   5    6.59    3.55
   1  -4  -5    3.57    2.63
  -1   4   5   13.36    3.95
  -1   4   4 1027.42   29.37
  -1   4   4  991.75   25.87
  -1   4   4  989.78   24.86
   1  -4  -4  948.62   22.88
   1  -4  -3   12.31    4.22
  -1   4   3    9.58    3.96
  -1   4   3   12.07    3.68
  -1   4   3    9.32    2.78
  -1   4   3    4.38    4.10
  -1   4   2 1015.72   25.51
   1  -4  -2  977.10   23.10
  -1   4   2 1045.06   25.25
   1  -4  -1  415.10   15.41
  -1   4   1  441.02   16.75
  -1   4   1  430.22   15.99
  -1   4   1  383.54   18.43
  -1   4   0 1157.85   25.04
   1  -4   0 1073.76   25.73
  -1   4   0 1087.24   26.84
  -1   4  -1  347.86   13.28
   1  -4   1  338.34   14.68
  -1   4  -1  401.03   16.17
  -1   4  -2  900.43   20.53
   1  -4   2  926.45   23.37
  -1   4  -2  909.90   24.85
  -1   4  -3  566.16   19.99
  -1   4  -3  507.93   14.89
  -1   4  -4 1320.44   23.26
  -1   4  -4 1354.99   31.11
  -1   4  -5 1330.60   22.68
  -1   4  -5 1409.56   32.15
  -1   4  -6    2.58    2.01
  -1   4  -6    4.93    2.90
  -1   4  -7   67.66    7.67
  -1   4  -7   72.07    5.19
  -1   4  -8  188.68    7.95
  -1   4  -8  203.66   13.46
  -1   4  -9    9.71    2.33
  -1   4  -9   10.52    3.92
  -1   4 -10   13.20    2.92
  -1   4 -10    3.86    3.55
  -1   4 -10   17.61    6.62
  -1   4 -11   17.25    5.74
  -1   4 -11   16.65    7.03
  -1   4 -12  166.23   17.88
  -1   4 -12  163.67   13.63
  -1   4 -13   42.96   10.58
  -1   4 -13   43.85    8.73
  -1   4 -14  307.80   24.79
  -1   4 -14  292.31   18.37
  -1   4 -15  117.49   17.16
  -1   4 -16   10.66    7.49
  -1   4 -17  871.34   46.67
  -1   4 -18   43.49   12.58
  -1   4 -19  233.82   27.61
  -1   4 -20   32.36   13.18
   1  -3 -19   70.61   16.39
   1  -3 -18   86.73   17.09
   1  -3 -17   13.13    7.23
   1  -3 -16   14.39    8.89
  -1   3  16   19.39    6.40
   1  -3 -15  316.66   25.45
  -1   3  15  257.43   19.11
  -1   3  14  420.48   23.01
   1  -3 -14  416.67   27.84
  -1   3  13  418.75   21.84
   1  -3 -13  440.41   26.81
   1  -3 -13  426.58   16.56
   1  -3 -12   63.83    6.82
  -1   3  12   77.97    9.65
   1  -3 -12   75.07   11.92
  -1   3  11  706.82   26.39
   1  -3 -11  730.69   19.94
   1  -3 -11  750.27   32.00
   1  -3 -10  822.24   20.60
  -1   3  10  841.74   27.24
   1  -3 -10  849.51   32.75
   1  -3  -9 1043.51   22.51
  -1   3   9  968.35   28.42
   1  -3  -9 1002.01   33.38
  -1   3   8   13.47    3.73
   1  -3  -8   13.29    3.41
   1  -3  -8    3.87    3.58
   1  -3  -8   14.84    2.79
  -1   3   8   12.84    2.97
  -1   3   7  267.11   15.76
   1  -3  -7  260.40    9.49
   1  -3  -7  270.59   11.50
  -1   3   7  315.59   10.61
   1  -3  -7  269.58   15.84
  -1   3   7  272.86   13.88
  -1   3   7  283.94   11.50
  -1   3   6  959.15   20.61
   1  -3  -6 1016.62   19.10
  -1   3   6  901.82   27.59
  -1   3   6 1033.46   19.74
  -1   3   6  940.58   24.59
   1  -3  -6 1009.69   21.43
   1  -3  -6  940.76   27.71
  -1   3   5  744.18   17.76
   1  -3  -5  772.72   17.14
  -1   3   5  737.15   24.19
  -1   3   5  699.87   17.73
   1  -3  -5  735.10   22.65
   1  -3  -5  729.67   18.02
  -1   3   5  683.24   19.79
   1  -3  -4 1434.84   23.56
  -1   3   4 1518.14   26.75
   1  -3  -4 1370.58   24.80
  -1   3   4 1421.95   25.43
  -1   3   4 1392.03   30.35
   1  -3  -4 1400.30   29.59
  -1   3   4 1461.75   28.07
   1  -3  -3 1589.69   26.73
   1  -3  -3 1538.49   28.71
  -1   3   3 1761.43   28.23
  -1   3   3 1805.30   30.58
  -1   3   3 2037.83   32.82
  -1   3   3 1803.68   34.06
   1  -3  -3 1782.69   26.70
   1  -3  -2 2076.26   29.05
  -1   3   2 2023.06   34.94
  -1   3   2 2075.97   30.90
  -1   3   2 2027.74   30.87
  -1   3   1 2524.25   34.79
   1  -3  -1 2660.73   33.19
  -1   3   1 2591.82   33.23
  -1   3   0 1705.56   28.82
   1  -3   0 1607.79   26.96
  -1   3   0 1664.48   25.78
  -1   3  -1   30.81    4.15
  -1   3  -1   42.48    6.03
   1  -3   1   24.84    4.19
  -1   3  -2   10.01    2.86
   1  -3   2    3.63    2.09
   1  -3   3   -0.34    1.08
  -1   3  -3 1609.99   29.14
  -1   3  -4 1439.17   28.36
   1  -3   4 1458.79   25.56
   1  -3   5 1273.67   24.36
  -1   3  -5 1233.74   26.58
   1  -3   6 1354.96   24.86
  -1   3  -6 1408.33   29.28
   1  -3   7 1008.56   21.50
  -1   3  -7 1001.01   25.15
  -1   3  -8   12.27    3.24
  -1   3  -8   16.78    4.44
  -1   3  -9  923.21   18.32
  -1   3  -9  987.25   35.27
  -1   3  -9  935.49   25.80
  -1   3 -10  302.43   15.00
  -1   3 -10  333.16   21.97
  -1   3 -11  256.66   19.47
  -1   3 -11  259.53   14.26
  -1   3 -12  646.93   32.09
  -1   3 -12  658.56   23.04
  -1   3 -13   66.99   10.76
  -1   3 -13   83.55    9.14
  -1   3 -14  123.23   15.90
  -1   3 -14  135.40   11.14
  -1   3 -15  137.58   16.82
  -1   3 -16  641.51   36.45
  -1   3 -17  124.24   17.46
  -1   3 -18  380.28   31.12
  -1   3 -19    8.82    8.43
  -1   3 -20   -0.88    8.93
  -1   3 -21    4.56    9.88
   1  -2 -20  133.53   22.13
   1  -2 -19    8.86   10.14
   1  -2 -18    0.83    7.97
   1  -2 -17  115.35   17.75
   1  -2 -16 1341.05   54.05
   1  -2 -15    6.86    9.04
  -1   2  15   -1.64    4.87
   1  -2 -14  533.58   31.18
  -1   2  14  507.31   23.68
   1  -2 -14  587.38   23.47
   1  -2 -13   10.72    4.95
   1  -2 -13   -4.25    6.01
  -1   2  13   -4.01    5.18
   1  -2 -12   81.99    8.42
   1  -2 -12   72.09   11.01
  -1   2  12   59.17    7.93
   1  -2 -11  277.04   13.74
  -1   2  11  228.44   13.80
   1  -2 -11  255.70   18.81
   1  -2 -10  427.65   22.82
   1  -2 -10  449.24   16.92
  -1   2  10  402.92   17.54
   1  -2  -9    5.32    4.66
  -1   2   9    5.27    2.82
   1  -2  -9   11.08    3.65
   1  -2  -8 1070.10   23.21
  -1   2   8 1029.49   25.19
   1  -2  -8 1067.48   33.03
  -1   2   7  331.16   13.63
  -1   2   7  363.24   17.42
   1  -2  -7  338.86   17.78
   1  -2  -7  345.24   12.88
  -1   2   6  222.51   10.74
   1  -2  -6  210.38    6.53
   1  -2  -6  222.50   13.68
  -1   2   6  200.45    7.45
   1  -2  -6  235.64   10.24
  -1   2   6  246.55   13.85
  -1   2   6  235.31    8.66
  -1   2   5 1437.17   25.73
   1  -2  -5 1513.54   32.12
   1  -2  -5 1453.50   23.71
  -1   2   5 1596.36   22.73
  -1   2   5 1526.79   32.30
   1  -2  -5 1361.82   17.56
  -1   2   5 1395.00   19.76
  -1   2   4 2190.16   25.08
   1  -2  -4 2283.58   23.22
   1  -2  -4 2257.53   36.65
  -1   2   4 2283.91   27.95
   1  -2  -4 2307.18   29.31
   1  -2  -3  729.13   16.89
  -1   2   3  750.43   14.97
   1  -2  -3  757.41   13.92
  -1   2   3  770.63   17.00
  -1   2   3  719.58   16.76
   1  -2  -3  752.46   19.28
  -1   2   2 2251.66   31.49
   1  -2  -1 2943.70   33.17
   1  -2   0 1015.92   16.99
  -1   2   0  975.52   17.31
  -1   2   0 1083.73   22.46
  -1   2  -1  345.75   10.55
   1  -2   1  355.94   10.52
  -1   2  -1  317.38   13.03
   1  -2   2   35.22    3.78
  -1   2  -2   31.47    3.54
  -1   2  -3   16.03    2.65
   1  -2   4 1629.75   22.50
  -1   2  -4 1644.40   24.49
  -1   2  -5 3191.76   35.23
   1  -2   5 3261.67   32.21
  -1   2  -6 2930.46   35.88
  -1   2  -6 2777.14   36.69
  -1   2  -7  150.08    8.22
  -1   2  -7  175.10    9.21
  -1   2  -8 1435.45   26.67
  -1   2  -8 1470.88   37.74
  -1   2  -8 1358.60   21.39
  -1   2  -9   24.80    4.33
  -1   2  -9   18.54    4.95
  -1   2  -9   11.60    2.35
  -1   2 -10  319.77   19.24
  -1   2 -10  344.06   13.69
  -1   2 -11  723.79   20.04
  -1   2 -11  672.03   29.16
  -1   2 -12   11.61    6.05
  -1   2 -12   20.32    5.89
  -1   2 -13    7.47    5.08
  -1   2 -13   14.40    4.09
  -1   2 -14   22.19    7.28
  -1   2 -15  323.17   24.01
  -1   2 -16  104.20   14.71
  -1   2 -17  423.68   30.07
  -1   2 -18   26.95    9.54
  -1   2 -19  240.84   25.17
  -1   2 -20  251.54   27.46
  -1   2 -21   77.93   17.40
  -1   2 -22  242.24   30.24
   1  -1 -21    1.39    9.89
   1  -1 -20   38.11   12.97
   1  -1 -19   10.25    9.99
   1  -1 -18  205.44   23.77
   1  -1 -17  208.83   22.80
   1  -1 -16  509.40   33.26
   1  -1 -15   -0.93    5.12
   1  -1 -15    9.29    6.00
  -1   1  14  320.76   17.52
   1  -1 -14  364.43   18.45
  -1   1  13    3.42    3.93
   1  -1 -13   -0.85    5.15
   1  -1 -13    6.31    4.11
   1  -1 -12  577.89   29.16
  -1   1  12  598.91   21.37
   1  -1 -12  568.50   20.49
   1  -1 -11   90.83    8.03
  -1   1  11   86.51    8.03
   1  -1 -11   89.20   11.59
   1  -1 -10    4.65    3.34
   1  -1 -10    8.99    3.65
  -1   1  10    4.66    2.43
   1  -1  -9   76.68    6.66
  -1   1   9   75.71    6.73
   1  -1  -9   55.01    8.00
   1  -1  -8   25.31    3.85
  -1   1   8   22.96    3.68
   1  -1  -8   33.61    6.17
   1  -1  -7 1733.88   37.75
   1  -1  -7 1735.49   27.58
  -1   1   7 1807.95   27.63
  -1   1   7 1857.57   38.02
  -1   1   6   43.14    6.17
   1  -1  -6   34.82    4.11
  -1   1   6   38.46    4.02
   1  -1  -6   31.71    5.37
  -1   1   5  401.82    7.00
   1  -1  -5  430.99   16.97
  -1   1   5  450.75   12.22
   1  -1  -5  445.32   12.82
  -1   1   4  836.42   15.36
  -1   1   4  796.72   10.70
   1  -1  -4  773.00   16.14
   1  -1  -4  739.12   20.33
  -1   1   4  784.01   15.25
  -1   1   3   -1.10    1.48
  -1   1   2   -0.08    1.97
  -1   1   2    0.00    0.34
   1  -1  -2   -0.25    1.83
   1  -1  -1 1631.15   22.22
  -1   1   1 1506.66   21.78
  -1   1   1 1663.69   21.90
   1  -1  -1 1497.57   21.08
   1  -1   0  801.59   15.75
  -1   1   0  787.86   15.23
   1  -1   1  763.53   15.57
  -1   1  -2 1765.74   25.08
  -1   1  -4   84.94    6.16
  -1   1  -4   71.01    4.21
  -1   1  -5 1824.33   21.34
  -1   1  -5 1913.40   27.23
  -1   1  -6  224.24    8.05
  -1   1  -6  239.82    9.75
  -1   1  -7  319.61   10.56
  -1   1  -7  327.18   15.16
  -1   1  -7  317.47    9.85
  -1   1  -8  544.07   13.22
  -1   1  -8  576.80   13.61
  -1   1  -8  561.67   21.13
  -1   1  -9 1517.24   37.48
  -1   1  -9 1449.45   21.46
  -1   1 -10  190.48    7.81
  -1   1 -10  234.52   15.04
  -1   1 -11  691.61   27.82
  -1   1 -11  762.83   16.88
  -1   1 -12  722.17   15.92
  -1   1 -12  690.51   29.12
  -1   1 -13  648.52   14.28
  -1   1 -13  675.63   29.85
  -1   1 -14   29.13    7.01
  -1   1 -15   26.56    8.74
  -1   1 -16  172.67   18.40
  -1   1 -17   29.60    8.91
  -1   1 -18  115.63   17.23
  -1   1 -19   26.96   10.25
  -1   1 -20   48.10   13.71
  -1   1 -21   47.71   14.04
  -1   1 -22   -3.69   10.25
   1   0 -21    7.51   10.91
   1   0 -20    7.48    8.88
   1   0 -19  206.17   24.74
   1   0 -18   70.75   15.16
   1   0 -17  127.28   18.04
   1   0 -16  146.25   18.31
   1   0 -16  126.05   12.36
   1   0 -15  267.66   16.71
   1   0 -15  273.70   22.76
   1   0 -14  156.06   16.78
   1   0 -14  132.57   11.45
   1   0 -13   20.43    6.74
  -1   0  13    6.69    4.01
   1   0 -13   18.43    5.37
   1   0 -12  150.87   11.22
  -1   0  12  142.28    9.49
   1   0 -11   14.29    4.05
  -1   0  11   20.20    4.14
   1   0 -11   20.33    6.70
  -1   0  10   10.92    2.91
   1   0 -10   18.46    4.01
   1   0 -10   12.14    4.49
  -1   0   9  730.16   16.89
   1   0  -9  647.54   18.85
   1   0  -9  680.55   26.31
   1   0  -8    5.60    3.03
  -1   0   8    8.16    2.43
   1   0  -8    6.06    2.33
  -1   0   7    2.20    1.61
   1   0  -7    1.64    2.11
   1   0  -6  238.01   12.62
   1   0  -6  227.22    9.53
  -1   0   6  250.96    8.07
   1   0  -5 1896.15   25.65
   1   0  -5 1779.10   32.07
   1   0  -4  129.68    6.19
   1   0  -4  142.48    8.71
  -1   0   4  158.16    9.08
  -1   0   4  138.26    4.99
  -1   0   3  235.78   10.17
   1   0  -3  230.48    7.84
   1   0  -3  214.94    9.51
  -1   0   2 1432.26   22.34
  -1   0   2 1509.17   18.66
   1   0  -2 1440.53   18.68
   1   0  -2 1381.30   21.22
  -1   0   1   12.24    2.18
   1   0  -1   11.04    1.79
  -1   0   1   11.95    1.96
   1   0  -1    0.63    0.62
   1   0   0    0.03    0.25
   1   0   0   -0.81    0.56
   1   0   1   -0.10    0.38
  -1   0  -1  459.27   10.00
  -1   0  -2 1973.13   25.81
  -1   0  -2 1921.50   21.13
  -1   0  -3   78.56    5.53
  -1   0  -3   66.09    4.25
  -1   0  -4 2329.17   27.01
   1   0   4 2369.92   30.99
   1   0   5 1076.74   21.80
  -1   0  -5 1047.20   20.16
  -1   0  -5 1124.48   19.77
   1   0   6   28.37    4.03
  -1   0  -6   19.16    3.30
  -1   0  -6   23.90    3.38
  -1   0  -7 1040.56   19.44
  -1   0  -7 1040.81   24.11
   1   0   7 1048.32   23.97
  -1   0  -8   13.76    1.89
   1   0   8   21.44    4.13
  -1   0  -8   17.02    3.08
  -1   0  -8   14.70    3.68
  -1   0  -9   23.61    2.54
   1   0   9   21.37    4.45
  -1   0  -9   19.86    4.47
  -1   0  -9   28.73    4.64
  -1   0 -10 1770.20   39.00
  -1   0 -10 1766.90   20.15
   1   0  10 1753.49   36.13
  -1   0 -11  621.95   16.69
  -1   0 -11  693.08   26.11
   1   0  11  707.88   24.35
  -1   0 -11  637.61   11.80
  -1   0 -12  580.76   16.52
   1   0  12  597.66   23.41
   1   0  13  575.98   23.84
  -1   0 -13  530.05   16.03
  -1   0 -14  417.89   24.68
   1   0  14  138.63   12.66
  -1   0 -15  226.55   18.91
  -1   0 -16  102.99   14.15
  -1   0 -17   65.01   12.74
  -1   0 -18   25.81    9.48
  -1   0 -19   -2.40    6.56
  -1   0 -20    7.24    8.27
  -1   0 -21  -10.31   10.68
   1   1 -21   80.93   19.76
   1   1 -20   51.29   15.72
   1   1 -19   17.73    9.49
   1   1 -18   46.98   12.71
   1   1 -17   59.87   12.10
   1   1 -16   61.00    8.84
   1   1 -16   64.78   13.27
   1   1 -15  120.21   11.65
   1   1 -15  139.61   16.66
   1   1 -14  130.28   15.86
   1   1 -14  100.64   10.63
   1   1 -13  347.41   23.39
   1   1 -12  150.49   14.78
   1   1 -11  312.92   20.38
   1   1 -10   43.25    7.64
  -1  -1   9   30.05    2.67
   1   1  -9  262.90   16.79
   1   1  -8   17.22    4.51
  -1  -1   8    7.41    1.38
  -1  -1   7  474.72    8.46
   1   1  -7  439.41   18.78
  -1  -1   6   -1.35    2.12
  -1  -1   6    2.27    0.84
   1   1  -6    1.76    1.78
   1   1  -6    4.08    2.48
  -1  -1   5  173.94    5.86
   1   1  -5  177.58   10.39
  -1  -1   5  202.06   11.21
  -1  -1   4  677.21   18.75
  -1  -1   4  614.96   11.42
   1   1  -4  591.63   17.12
  -1  -1   3  784.44   13.31
   1   1  -3  856.68   18.59
  -1  -1   2   73.97    5.23
   1   1  -2   69.36    4.98
   1   1  -1 1291.31   19.23
  -1  -1   1 1813.89   20.61
  -1  -1   1 1918.70   22.47
   1   1  -1 1489.28   19.56
  -1  -1   0 1720.48   16.11
   1   1   0 1830.98   22.45
   1   1   0 1872.67   21.43
  -1  -1  -1   24.73    3.12
   1   1   1   -0.26    0.33
   1   1   1    0.50    0.98
  -1  -1  -1   23.30    2.76
  -1  -1  -1   21.47    1.92
   1   1   1    0.54    0.61
   1   1   2    0.10    0.65
  -1  -1  -2  620.93    8.84
  -1  -1  -2  624.23   13.32
  -1  -1  -2  713.86   15.45
  -1  -1  -3 4346.81   38.95
   1   1   3    0.02    0.71
  -1  -1  -5 2726.54   28.42
   1   1   5 2781.78   34.50
  -1  -1  -5 2925.23   33.03
  -1  -1  -5 2921.47   23.73
  -1  -1  -5 3006.79   33.27
  -1  -1  -6  213.93    7.42
  -1  -1  -6  175.16    8.75
  -1  -1  -6  223.63    9.49
  -1  -1  -6  180.13    8.56
   1   1   6  162.81    9.12
  -1  -1  -7  768.92   18.65
  -1  -1  -7  716.47   18.99
   1   1   7  775.50   20.63
  -1  -1  -7  754.44   16.30
   1   1   8  222.98   12.04
  -1  -1  -8  250.33   11.27
  -1  -1  -8  212.18   11.48
  -1  -1  -8  229.51    9.31
  -1  -1  -9  595.33   20.75
   1   1   9  617.18   21.69
  -1  -1  -9  608.88   17.71
  -1  -1 -10   82.35    4.90
  -1  -1 -10   82.90    8.47
  -1  -1 -10   82.95    7.32
   1   1  10  111.89   10.79
  -1  -1 -11  796.11   21.41
  -1  -1 -11  829.98   28.21
  -1  -1 -12  520.56   23.83
   1   1  12  537.79   23.41
   1   1  13  197.09   15.71
  -1  -1 -13  224.25   16.96
   1   1  14  785.11   31.17
  -1  -1 -14  999.43   37.60
  -1  -1 -15   23.45    7.67
  -1  -1 -15   18.52    4.29
   1   1  15   19.69    6.58
  -1  -1 -16    1.80    5.17
  -1  -1 -17    4.19    7.09
  -1  -1 -18   32.97   10.15
  -1  -1 -19  150.09   19.61
  -1  -1 -20   -0.80    9.21
   1   2 -20  148.04   22.89
   1   2 -19  392.92   33.28
   1   2 -18  172.68   22.24
   1   2 -17  166.97   15.63
   1   2 -17  253.85   24.84
   1   2 -16   37.13    9.65
   1   2 -16   25.40    9.20
   1   2 -15    6.21    5.33
   1   2 -14  927.14   40.98
   1   2 -13  199.78   18.81
   1   2 -12  159.76   15.84
   1   2 -11   22.45    6.62
   1   2 -10   65.43    6.09
   1   2 -10   79.81   10.42
   1   2  -9   10.38    3.38
  -1  -2   9   10.68    2.07
   1   2  -9   10.87    4.37
   1   2  -8   49.16    7.50
  -1  -2   8   51.82    4.12
   1   2  -8   47.85    5.15
   1   2  -7  619.62   23.87
  -1  -2   7  654.91   14.28
   1   2  -7  572.88   16.79
   1   2  -6 1232.64   23.94
   1   2  -6 1192.17   30.71
  -1  -2   5    2.65    1.36
   1   2  -5    6.20    2.93
   1   2  -5    1.85    2.21
   1   2  -4  106.43    6.98
  -1  -2   4  124.06    6.77
   1   2  -4  130.05    9.06
  -1  -2   3  776.29   16.60
  -1  -2   3  767.49   10.36
   1   2  -3  731.14   19.61
   1   2  -3  698.53   17.33
   1   2  -2  669.65   16.79
   1   2  -2  629.38   12.63
  -1  -2   2  627.40   11.11
   1   2  -2  577.29   15.65
  -1  -2   1  235.26    9.49
   1   2  -1  209.94    7.66
   1   2  -1  184.40    7.87
   1   2  -1  202.08    9.61
  -1  -2   0 1854.57   22.47
   1   2   0 1886.22   23.56
   1   2   0 1842.20   27.53
  -1  -2   0 1795.94   25.98
  -1  -2  -1  384.64   12.40
   1   2   1  403.38   12.97
  -1  -2  -1  398.42   11.16
   1   2   1  404.07   11.96
  -1  -2  -2 3924.76   38.74
  -1  -2  -2 3799.24   37.03
   1   2   3   16.62    3.55
  -1  -2  -3    3.92    2.15
   1   2   3   21.43    3.79
  -1  -2  -3    9.90    3.37
  -1  -2  -4 1758.88   26.33
  -1  -2  -4 1746.80   18.60
   1   2   4 1861.74   29.50
   1   2   4 1743.38   28.93
  -1  -2  -4 1649.85   27.04
   1   2   4 1758.58   17.59
  -1  -2  -5   20.34    2.95
  -1  -2  -5    9.99    2.92
  -1  -2  -5   22.37    3.54
   1   2   5   13.71    2.03
   1   2   5   12.91    3.21
   1   2   5   15.75    3.66
   1   2   6  263.88    9.40
   1   2   6  251.27   12.27
  -1  -2  -6  262.32   10.23
  -1  -2  -6  263.28   10.50
  -1  -2  -6  266.01   11.84
  -1  -2  -7  252.55   12.13
  -1  -2  -7  247.91   11.53
   1   2   7  246.85   12.76
  -1  -2  -7  270.40   10.48
   1   2   7  248.63   10.18
   1   2   8  175.97    9.49
   1   2   8  162.11   10.82
  -1  -2  -8  181.79   10.77
  -1  -2  -8  172.31   10.53
  -1  -2  -8  187.00    8.51
   1   2   9   45.58    6.31
  -1  -2  -9   45.27    4.18
  -1  -2  -9   39.31    6.16
  -1  -2  -9   32.24    5.51
   1   2   9   40.34    5.40
  -1  -2  -9   38.13    3.12
  -1  -2 -10   46.57    7.13
  -1  -2 -10   25.31    2.61
  -1  -2 -10   42.48    3.96
   1   2  10   47.91    6.84
  -1  -2 -10   41.91    6.49
  -1  -2 -10   44.88    3.98
   1   2  10   53.05    6.27
  -1  -2 -11  282.21    8.49
   1   2  11  315.76   17.38
  -1  -2 -11  292.35    9.96
  -1  -2 -11  285.93   16.96
   1   2  12  722.09   28.06
  -1  -2 -12  356.11    7.44
  -1  -2 -12  620.71   15.46
  -1  -2 -12  439.50   12.18
  -1  -2 -12  745.13   29.15
  -1  -2 -13  496.23   25.44
   1   2  13  565.00   27.33
  -1  -2 -13  379.43   12.96
  -1  -2 -13  281.50   10.56
   1   2  14  188.76   17.31
  -1  -2 -14  221.15   18.46
  -1  -2 -15  352.15   24.24
   1   2  15  335.15   22.43
   1   2  16   50.72   11.38
  -1  -2 -16   58.03   11.63
  -1  -2 -17  555.96   32.96
  -1  -2 -18  476.64   32.33
  -1  -2 -19   11.99   10.29
   1   3 -20  214.25   28.09
   1   3 -19    6.76    9.05
   1   3 -18   30.13   11.85
   1   3 -17   -0.58    7.71
   1   3 -16   59.82   12.68
   1   3 -15    4.16    5.87
   1   3 -14  147.24   17.51
   1   3 -13    4.79    5.47
   1   3 -12   13.21    6.58
   1   3 -12   -2.67    4.59
   1   3 -11   23.03    7.65
   1   3 -11   24.38    5.39
  -1  -3  10  142.42    7.81
   1   3 -10  122.93   13.36
   1   3 -10  127.55   10.13
   1   3  -9  155.60   11.23
   1   3  -9  136.13   13.50
  -1  -3   9  157.50    8.59
   1   3  -8  610.44   26.17
  -1  -3   8  667.11   17.32
   1   3  -8  624.73   21.31
   1   3  -7 2283.69   47.50
   1   3  -7 2348.84   39.75
   1   3  -6 1063.12   31.74
   1   3  -6 1007.02   25.81
  -1  -3   6 1061.56   23.09
  -1  -3   5 1432.93   26.59
   1   3  -5 1426.64   30.33
   1   3  -5 1462.80   34.71
  -1  -3   4   35.74    4.70
   1   3  -4   42.41    5.97
  -1  -3   4   36.61    2.69
   1   3  -4   41.67    3.76
   1   3  -4   32.72    4.83
  -1  -3   3  428.14   10.18
   1   3  -3  408.56   15.76
  -1  -3   3  439.79   14.84
   1   3  -3  423.67   11.67
   1   3  -3  477.92   17.88
  -1  -3   2  176.45    7.27
   1   3  -2  174.72    8.02
   1   3  -2  172.01   10.36
  -1  -3   1 1032.39   18.30
   1   3  -1 1056.86   24.86
  -1  -3   1  940.72   21.96
   1   3  -1 1002.24   19.93
   1   3   0  188.32   10.54
  -1  -3   0  175.62    9.59
   1   3   0  175.91    8.79
  -1  -3  -1   78.91    6.55
   1   3   1   75.32    6.17
   1   3   1   68.99    6.81
  -1  -3  -1   77.16    5.95
   1   3   2 1471.57   29.11
  -1  -3  -2 1378.62   26.05
   1   3   2 1387.62   26.34
  -1  -3  -2 1424.90   25.66
   1   3   3   88.93    5.29
  -1  -3  -3   65.95    6.04
   1   3   3   84.32    7.08
  -1  -3  -3   74.38    6.45
   1   3   3   85.89    7.26
  -1  -3  -4  619.07   17.59
   1   3   4  678.69   20.44
   1   3   4  623.64   19.33
   1   3   4  683.24   13.60
  -1  -3  -4  638.71   18.29
  -1  -3  -5  806.32   15.48
  -1  -3  -5  880.82   20.84
   1   3   5  846.27   16.82
   1   3   5  892.34   23.40
  -1  -3  -5  830.04   21.67
   1   3   5  789.97   23.05
  -1  -3  -6    2.40    2.94
  -1  -3  -6    1.75    2.19
   1   3   6    5.63    3.35
   1   3   6   -0.43    1.74
   1   3   6   -0.53    2.35
  -1  -3  -7 5332.54   50.88
  -1  -3  -7 5423.27   52.80
   1   3   7 5297.10   47.73
   1   3   7 5542.16   61.92
   1   3   7 5258.36   63.60
   1   3   8 4613.82   47.25
   1   3   8 4622.97   63.01
  -1  -3  -8 4650.30   46.83
  -1  -3  -8 4609.33   52.35
   1   3   9  725.48   20.26
  -1  -3  -9  797.29   23.93
   1   3   9  717.05   25.56
  -1  -3  -9  752.43   18.70
  -1  -3 -10  371.14   12.72
   1   3  10  319.50   17.98
  -1  -3 -10  392.76   18.89
   1   3  10  366.82   15.95
  -1  -3 -11  226.83   15.66
   1   3  11  252.78   16.67
  -1  -3 -11  227.98    9.92
   1   3  11  218.93   13.06
   1   3  12  188.84   15.44
  -1  -3 -12  156.95    7.72
  -1  -3 -12  195.50   15.71
  -1  -3 -13  195.71   16.37
   1   3  13  179.47   15.73
  -1  -3 -14    8.09    5.83
   1   3  14    0.59    4.33
   1   3  15   35.33    9.17
  -1  -3 -15   32.50    8.92
   1   3  16   21.56    8.62
  -1  -3 -16   41.16   11.18
   1   3  17  247.40   21.90
  -1  -3 -17  378.64   28.34
  -1  -3 -18    2.79    8.05
   1   4 -19  167.13   24.73
   1   4 -18  191.20   24.38
   1   4 -17  110.47   18.05
   1   4 -16  257.17   25.70
   1   4 -15   52.68   12.22
   1   4 -14   36.73    9.93
   1   4 -13  113.81   15.50
   1   4 -12   -0.66    5.45
   1   4 -12    6.89    5.66
   1   4 -11   66.27    9.44
   1   4 -11   52.51   10.01
  -1  -4  10    8.82    3.36
   1   4 -10   15.31    6.52
   1   4 -10    3.59    4.30
   1   4  -9  354.22   22.15
   1   4  -9  349.47   18.50
  -1  -4   9  313.37   13.78
  -1  -4   8   42.26    5.60
   1   4  -8   28.93    6.16
   1   4  -8   40.60    8.43
   1   4  -7  681.32   24.89
  -1  -4   7  679.88   21.26
   1   4  -6 2401.44   28.90
   1   4  -6 2577.73   47.34
  -1  -4   6 2498.12   40.81
   1   4  -5  134.09    7.55
   1   4  -5  140.20   11.36
   1   4  -5  129.15   11.68
  -1  -4   5  106.36    8.73
  -1  -4   4 1157.93   27.17
   1   4  -4 1199.19   31.09
   1   4  -4 1196.30   22.45
  -1  -4   4 1230.02   18.73
   1   4  -3   -0.04    2.91
  -1  -4   3    2.23    2.50
  -1  -4   3    0.86    1.65
   1   4  -3   -0.86    2.40
   1   4  -2  452.13   14.86
   1   4  -2  459.78   19.06
  -1  -4   2  437.62   13.21
   1   4  -1  451.27   15.60
  -1  -4   1  465.45   14.17
  -1  -4   1  439.05   16.63
   1   4  -1  433.16   18.22
   1   4   0   79.05    6.85
  -1  -4   0   74.99    6.99
  -1  -4   0   66.43    6.10
   1   4   0   77.21    7.89
   1   4   1  396.95   15.91
  -1  -4  -1  370.69   14.99
   1   4   1  378.40   17.47
   1   4   2   78.31    7.67
  -1  -4  -2   80.85    7.39
  -1  -4  -2   57.69    6.95
   1   4   2   80.82    8.14
   1   4   3   17.88    4.05
  -1  -4  -3   12.88    3.14
   1   4   3   19.14    4.42
  -1  -4  -3   14.90    3.52
   1   4   4   59.93    5.77
   1   4   4   45.09    6.28
   1   4   4   60.90    7.18
  -1  -4  -4   32.97    5.03
  -1  -4  -4   42.11    5.87
   1   4   5  457.42   14.48
   1   4   5  457.95   19.11
  -1  -4  -5  430.97   16.43
   1   4   5  467.73   18.98
   1   4   6 1344.60   34.04
   1   4   6 1355.68   32.42
   1   4   6 1411.40   25.65
  -1  -4  -6 1294.78   28.30
  -1  -4  -7  287.64   13.50
   1   4   7  286.67   12.11
   1   4   7  269.26   15.94
  -1  -4  -7  271.80   11.51
   1   4   7  296.03   15.65
  -1  -4  -8  794.15   21.02
  -1  -4  -8  764.64   21.43
   1   4   8  818.31   27.35
   1   4   8  815.35   20.85
   1   4   8  788.59   27.76
  -1  -4  -9  158.26   10.18
   1   4   9  168.31    9.97
  -1  -4  -9  172.75   11.03
   1   4   9  144.46   12.04
   1   4   9  172.86   13.90
  -1  -4 -10   20.55    4.67
  -1  -4 -10   38.65    7.09
   1   4  10   27.20    4.98
   1   4  10   39.25    6.80
   1   4  11  257.89   17.71
   1   4  11  255.51   13.74
  -1  -4 -11  267.85   16.01
  -1  -4 -11  258.17   12.34
   1   4  12   36.28    8.31
  -1  -4 -12   25.50    7.26
  -1  -4 -12   23.00    4.44
  -1  -4 -13   15.21    7.53
   1   4  13   23.66    7.61
  -1  -4 -14   18.58    6.81
   1   4  14   22.89    6.77
  -1  -4 -15   -7.94    6.65
   1   4  15   -0.58    4.94
   1   4  16   23.14    7.93
  -1  -4 -16   13.85    8.78
  -1  -4 -17   17.85    9.54
   1   4  17   -2.73    7.82
   1   5 -18  432.52   37.93
   1   5 -17   31.79   11.97
   1   5 -16    4.49    8.88
   1   5 -15   18.20    8.19
   1   5 -14   38.14   10.33
   1   5 -13    8.01    7.13
   1   5 -12   44.87    8.73
   1   5 -12   57.34   12.19
   1   5 -11  510.57   26.10
   1   5 -11  492.53   30.75
   1   5 -10  175.55   17.45
   1   5 -10  174.95   15.34
   1   5  -9  127.42   15.09
   1   5  -9   93.92   11.58
   1   5  -8  706.69   29.02
   1   5  -8  772.31   33.86
   1   5  -7  281.05   20.23
   1   5  -7  267.15   18.11
   1   5  -7  278.67   11.71
   1   5  -6  687.28   18.93
   1   5  -6  750.87   30.72
   1   5  -6  721.99   28.19
   1   5  -5 1361.64   27.34
   1   5  -5 1397.07   38.58
   1   5  -4  599.73   24.52
   1   5  -4  566.37   18.28
   1   5  -3 1147.59   26.29
  -1  -5   3 1134.95   23.01
   1   5  -3 1179.31   34.17
   1   5  -2 2164.79   37.01
  -1  -5   2 2199.20   33.97
   1   5  -2 2183.97   45.85
   1   5  -1  175.44   13.55
  -1  -5   1  192.12   10.71
   1   5  -1  182.79   11.53
   1   5   0  859.59   28.64
  -1  -5   0  843.98   22.29
   1   5   0  853.04   25.10
  -1  -5  -1  439.52   16.77
   1   5   1  458.44   21.34
   1   5   1  494.93   19.83
   1   5   2    4.78    4.14
   1   5   2   -0.11    2.71
   1   5   3  388.55   18.82
   1   5   3  385.59   19.36
   1   5   4  219.62   14.54
   1   5   4  246.80   15.48
   1   5   5 1016.14   31.58
   1   5   5 1029.56   32.03
   1   5   6  793.79   25.80
   1   5   6  828.63   29.07
   1   5   6  833.13   24.17
   1   5   6  846.65   28.89
   1   5   7 1719.29   40.97
   1   5   7 1747.47   33.26
   1   5   8   23.09    6.16
   1   5   8   20.62    5.47
   1   5   8   14.83    3.90
   1   5   9  533.83   24.53
   1   5   9  460.13   18.10
   1   5   9  471.52   23.94
  -1  -5  -9  534.70   18.20
   1   5  10  883.02   25.23
   1   5  10  903.42   31.51
  -1  -5 -10  944.77   26.68
   1   5  10  937.10   35.16
   1   5  11  138.35   14.76
  -1  -5 -11  148.58   11.70
   1   5  11  147.54   10.75
   1   5  11  160.79   14.18
   1   5  12   15.52    6.46
  -1  -5 -12   10.06    4.78
   1   5  13   55.26   10.47
  -1  -5 -13   38.80    7.99
  -1  -5 -14    2.80    6.12
   1   5  14   17.09    6.00
   1   5  15   17.05    6.66
  -1  -5 -15    9.08    5.87
   1   5  16   10.15    7.80
  -1  -5 -16    5.51    7.15
   1   5  17    0.14    7.26
   1   5  18   -0.27    8.02
   1   6 -17  200.62   26.13
   1   6 -16   73.95   15.62
   1   6 -15   33.57   11.64
   1   6 -14   66.11   14.26
   1   6 -13   50.69   12.32
   1   6 -12   67.28   12.75
   1   6 -12   68.37   13.38
   1   6 -11   30.47   10.13
   1   6 -11   29.36    8.41
   1   6 -10   68.08   11.67
   1   6 -10   41.55    9.65
   1   6  -9  225.35   20.12
   1   6  -9  228.82   19.23
   1   6  -8  108.27    8.21
   1   6  -8  139.22   15.62
   1   6  -8  136.48   15.11
   1   6  -7   88.48   12.32
   1   6  -7   67.14    7.92
   1   6  -7   96.73   13.30
   1   6  -6  789.14   23.46
   1   6  -6  854.88   35.60
   1   6  -6  755.53   31.73
   1   6  -5  431.25   23.90
   1   6  -5  439.47   18.18
   1   6  -4  498.64   19.61
   1   6  -4  537.12   25.88
   1   6  -3   -2.44    4.68
   1   6  -3    2.07    3.12
   1   6  -2   57.25    7.53
   1   6  -2   54.05    8.68
   1   6  -1   -1.07    4.48
   1   6  -1   -0.11    2.82
   1   6   0    3.22    3.15
   1   6   0    6.37    3.76
   1   6   1  205.59   14.32
   1   6   1  190.31   15.29
   1   6   2  496.21   24.43
   1   6   2  482.36   22.00
   1   6   3   23.47    5.50
   1   6   3   19.14    5.31
   1   6   4  514.34   24.80
   1   6   4  546.95   28.68
   1   6   5    1.27    3.80
   1   6   5    0.78    5.25
   1   6   5    1.61    3.73
   1   6   6   29.79    5.84
   1   6   6   40.48    7.67
   1   6   6   41.21    7.75
   1   6   7  341.42   17.57
   1   6   7  324.04   19.89
   1   6   7  354.14   20.89
   1   6   8 2173.49   52.90
   1   6   8 2193.55   50.86
   1   6   8 2243.04   43.48
   1   6   9    3.00    3.23
   1   6   9    2.58    5.29
   1   6   9    0.31    5.06
   1   6  10  266.05   19.97
   1   6  10  277.15   15.61
   1   6  11    5.01    5.66
   1   6  11   10.08    5.04
   1   6  12  215.26   19.39
  -1  -6 -12  211.08   13.43
   1   6  12  216.25   17.96
  -1  -6 -13   34.00    7.32
   1   6  13   26.27    8.05
  -1  -6 -14   38.40    8.25
   1   6  14   31.31    9.85
   1   6  15    1.15    5.80
   1   6  16    4.26    6.27
   1   6  17  190.88   22.02
   1   6  18   15.03    8.75
   1   7 -16  -10.61   10.55
   1   7 -15   20.21   10.61
   1   7 -14   11.16    9.49
   1   7 -13  384.27   32.16
   1   7 -12  406.40   29.32
   1   7 -12  486.27   34.20
   1   7 -11   -2.92    6.10
   1   7 -11    6.35    7.46
   1   7 -10  519.66   34.42
   1   7 -10  513.75   31.86
   1   7  -9  242.93   22.43
   1   7  -9  221.38   20.91
   1   7  -8   74.58   12.59
   1   7  -8   84.77    9.28
   1   7  -8   90.23   14.20
   1   7  -7  713.48   35.91
   1   7  -7  703.89   34.48
   1   7  -7  641.84   23.72
   1   7  -6   40.33    8.08
   1   7  -6   37.15    8.65
   1   7  -5  988.92   30.87
   1   7  -5 1036.87   40.01
   1   7  -4  338.46   18.21
   1   7  -4  272.54   21.14
   1   7  -3   73.05    8.76
   1   7  -3   76.85   11.38
   1   7  -2  107.83   13.27
   1   7  -2   81.43    9.38
   1   7  -1   56.87    9.74
   1   7  -1   48.06    7.56
   1   7   0  421.88   25.01
   1   7   0  419.01   21.78
   1   7   1  926.36   36.33
   1   7   1  864.09   31.85
   1   7   2 1165.53   40.73
   1   7   2 1084.03   36.23
   1   7   3 1918.33   52.18
   1   7   3 2001.21   49.83
   1   7   4   11.52    5.31
   1   7   4   12.20    5.03
   1   7   5 1651.17   47.87
   1   7   5 1606.10   46.76
   1   7   6  242.39   18.64
   1   7   6  220.13   18.33
   1   7   6  253.23   19.18
   1   7   7 1045.89   37.08
   1   7   7  933.16   36.61
   1   7   7  967.39   36.95
   1   7   8   10.87   10.01
   1   7   8    1.03    5.52
   1   7   8    6.25    4.70
   1   7   8   -1.65    4.99
   1   7   9  722.60   32.68
   1   7   9  652.15   32.01
   1   7  10    3.48    5.39
   1   7  10    7.66    5.84
   1   7  11   73.83   11.99
   1   7  11   34.65    9.71
   1   7  12  644.66   32.37
   1   7  12  681.69   35.49
   1   7  13  214.76   20.55
   1   7  13  195.53   19.08
   1   7  14  524.94   32.43
   1   7  15  126.11   17.04
   1   7  16  298.26   26.12
   1   7  17  122.39   18.32
   1   7  18  134.91   20.17
   1   7  19   39.41   14.72
   1   8 -15    1.11    8.05
   1   8 -14    9.93    9.27
   1   8 -13  321.81   30.94
   1   8 -12   44.05   11.87
   1   8 -12   60.27   14.70
   1   8 -11  683.94   40.04
   1   8 -11  599.17   38.99
   1   8 -10  139.05   19.03
   1   8 -10  113.62   16.64
   1   8  -9  287.58   25.63
   1   8  -9  304.21   26.43
   1   8  -8  472.01   32.63
   1   8  -8  409.61   30.07
   1   8  -7   48.51    8.85
   1   8  -7   79.91   13.60
   1   8  -7   61.06   11.96
   1   8  -6  328.26   25.16
   1   8  -6  267.99   18.18
   1   8  -5    0.47    6.33
   1   8  -5    3.24    5.16
   1   8  -4  276.36   23.04
   1   8  -4  318.00   19.88
   1   8  -3  296.57   23.36
   1   8  -3  272.31   18.68
   1   8  -2   41.56    9.62
   1   8  -2   62.54    9.81
   1   8  -1  399.61   22.28
   1   8  -1  391.85   26.13
   1   8   0    2.57    4.52
   1   8   0    1.86    5.77
   1   8   1  429.02   27.17
   1   8   1  424.63   23.69
   1   8   2 2299.65   62.02
   1   8   2 2180.81   55.09
   1   8   3   99.23   13.53
   1   8   3   72.73   10.75
   1   8   4  890.83   36.10
   1   8   4  891.20   38.99
   1   8   5  632.29   30.88
   1   8   5  602.70   31.90
   1   8   6  307.65   22.37
   1   8   6  311.79   22.94
   1   8   7  112.89   14.11
   1   8   7  128.76   15.21
   1   8   8   47.78    9.55
   1   8   8   49.64    9.91
   1   8   9  462.90   28.08
   1   8   9  480.64   29.03
   1   8  10  274.32   22.76
   1   8  10  288.87   22.84
   1   8  11   -6.49    6.24
   1   8  11   13.53    8.36
   1   8  12   83.45   14.34
   1   8  12   78.59   14.03
   1   8  13   28.42    9.38
   1   8  13   18.40    9.65
   1   8  14    9.36    7.54
   1   8  15  279.71   25.73
   1   8  16  555.54   36.80
   1   8  17  135.67   20.37
   1   8  18   13.80    9.23
   1   8  19   94.98   19.62
   1   9 -14   79.13   19.47
   1   9 -13    7.44    9.16
   1   9 -12  337.87   31.30
   1   9 -12  323.51   30.85
   1   9 -11   13.90   10.68
   1   9 -11    5.41    9.58
   1   9 -10  299.23   28.94
   1   9 -10  306.73   29.16
   1   9  -9  255.31   26.58
   1   9  -9  216.42   23.63
   1   9  -8  215.27   23.03
   1   9  -8  302.82   28.71
   1   9  -7   38.15   10.80
   1   9  -7   52.07   12.98
   1   9  -6   49.44   10.55
   1   9  -6   45.19   12.07
   1   9  -5    9.23    7.34
   1   9  -5    7.16    6.59
   1   9  -4  185.61   17.54
   1   9  -4  129.58   17.24
   1   9  -3   70.98   13.47
   1   9  -3   80.98   11.71
   1   9  -2  200.86   20.66
   1   9  -2  188.07   16.68
   1   9  -1    7.92    6.50
   1   9  -1    3.59    5.82
   1   9   0   81.70   13.46
   1   9   0   60.01   10.00
   1   9   1  140.03   15.50
   1   9   1  124.27   16.82
   1   9   2   79.33   13.57
   1   9   2   58.88   10.55
   1   9   3   29.09    8.14
   1   9   3   54.49   11.42
   1   9   4  335.45   25.72
   1   9   4  269.07   21.24
   1   9   5  444.39   27.86
   1   9   5  417.69   28.55
   1   9   6  131.52   16.16
   1   9   6  159.89   18.13
   1   9   7  726.90   38.12
   1   9   7  705.05   35.72
   1   9   8  180.87   19.12
   1   9   8  222.24   21.50
   1   9   9    5.70    5.72
   1   9   9   15.07    7.61
   1   9  10   -4.58    8.46
   1   9  10    4.98    6.42
   1   9  11    3.85    5.94
   1   9  11   -5.20    5.93
   1   9  12   20.92   10.90
   1   9  12   33.72   10.91
   1   9  13   11.16    8.50
   1   9  13    6.89    7.06
   1   9  14   42.10   11.81
   1   9  15  403.15   32.95
   1   9  16  119.03   19.21
   1   9  17  262.54   27.93
   1   9  18   21.26   12.01
   1   9  19  114.57   21.41
   1  10 -12   12.96   10.59
   1  10 -11  171.55   25.77
   1  10 -11  140.64   22.70
   1  10 -10    4.54    9.06
   1  10 -10   36.08   14.42
   1  10  -9  385.20   34.28
   1  10  -9  393.36   35.56
   1  10  -8  236.81   26.47
   1  10  -8  182.69   23.93
   1  10  -7  642.14   42.53
   1  10  -7  761.43   45.32
   1  10  -6  183.09   23.25
   1  10  -6  214.99   24.45
   1  10  -5  476.09   29.53
   1  10  -5  447.02   34.54
   1  10  -4   66.04   13.22
   1  10  -4  115.49   16.48
   1  10  -3  376.54   26.11
   1  10  -3  351.04   29.66
   1  10  -2   10.39    8.65
   1  10  -2    5.53    6.95
   1  10  -1   28.95    8.62
   1  10  -1    9.35    6.11
   1  10   0  211.04   19.66
   1  10   0  218.06   23.16
   1  10   1   27.20    7.43
   1  10   1   32.78   10.21
   1  10   2  381.11   26.13
   1  10   2  454.02   32.15
   1  10   3  422.39   27.94
   1  10   3  415.42   30.91
   1  10   4 1052.40   49.11
   1  10   4  946.70   42.05
   1  10   5    6.76    6.54
   1  10   5   36.04   11.02
   1  10   6  421.61   29.12
   1  10   6  464.29   32.60
   1  10   7   33.51   10.79
   1  10   7   19.97    8.50
   1  10   8    4.41    7.04
   1  10   8   -3.60    5.79
   1  10   9  416.49   32.12
   1  10   9  338.84   28.11
   1  10  10  445.33   31.96
   1  10  10  526.54   35.38
   1  10  11    2.76    6.50
   1  10  11   16.26    9.58
   1  10  12  308.11   28.79
   1  10  12  288.29   27.45
   1  10  13   26.40   13.36
   1  10  13   30.48   12.23
   1  10  14  146.78   20.87
   1  10  15   31.76   11.73
   1  10  16  379.90   33.97
   1  10  17   -1.02   10.61
   1  11 -11   50.59   18.78
   1  11 -10   50.57   16.06
   1  11 -10   66.87   19.72
   1  11  -9  109.10   20.80
   1  11  -9   97.52   20.67
   1  11  -8  107.17   20.50
   1  11  -8  122.53   21.93
   1  11  -7   13.54   12.56
   1  11  -7   22.69   10.24
   1  11  -6  337.24   32.64
   1  11  -6  270.53   29.12
   1  11  -5  383.48   34.12
   1  11  -4   64.26   15.21
   1  11  -4   43.77   12.34
   1  11  -3   24.93   10.83
   1  11  -3   13.78    8.91
   1  11  -2   76.91   16.85
   1  11  -2   62.35   13.60
   1  11  -1  560.58   34.35
   1  11  -1  601.93   40.08
   1  11   0    0.08    7.52
   1  11   0   -3.55    7.40
   1  11   1   92.21   14.88
   1  11   1  127.51   19.86
   1  11   2  126.21   18.92
   1  11   2  121.89   16.63
   1  11   3  192.43   23.35
   1  11   3  170.19   19.53
   1  11   4   47.69   12.74
   1  11   4   50.07   12.34
   1  11   5  635.13   37.51
   1  11   5  624.11   40.92
   1  11   6   10.61    9.03
   1  11   6   21.89    9.93
   1  11   7   89.54   15.31
   1  11   7  127.29   21.01
   1  11   8  523.18   36.03
   1  11   8  535.17   37.93
   1  11   9   25.09   11.51
   1  11   9   25.84   10.52
   1  11  10   21.78   10.20
   1  11  10   45.14   13.74
   1  11  11  146.00   21.44
   1  11  11  138.41   20.38
   1  11  12   12.86    8.99
   1  11  12   -2.50    9.98
   1  11  13  226.57   26.90
   1  11  13  168.72   24.68
   1  11  14    1.08   10.02
   1  11  15   74.51   17.96
   1  12  -9  160.26   28.13
   1  12  -8    8.54   13.18
   1  12  -8   14.41   12.93
   1  12  -7   27.21   14.12
   1  12  -7   24.94   11.64
   1  12  -6   -2.51   11.48
   1  12  -6    3.42   10.25
   1  12  -5   -8.12   10.35
   1  12  -5   -0.66    9.65
   1  12  -4   46.00   15.73
   1  12  -3  201.47   26.38
   1  12  -3  244.32   26.48
   1  12  -2  267.79   26.16
   1  12  -2  324.40   33.15
   1  12  -1  150.16   20.58
   1  12  -1   97.50   18.43
   1  12   0  958.19   48.98
   1  12   0  963.80   54.65
   1  12   1   51.26   14.08
   1  12   1   63.58   14.15
   1  12   2  139.21   19.11
   1  12   2  132.10   21.53
   1  12   3   18.95   12.16
   1  12   3    3.25    8.63
   1  12   4  284.43   26.78
   1  12   4  288.76   30.37
   1  12   5   23.10   11.07
   1  12   5   10.35    8.90
   1  12   6   69.73   14.60
   1  12   6   63.20   14.90
   1  12   7   21.27   10.38
   1  12   7   17.63   11.78
   1  12   8   44.23   13.16
   1  12   8   52.18   14.50
   1  12   9   -2.30    9.25
   1  12   9    3.70    8.50
   1  12  10   19.35   11.73
   1  12  10   18.82   13.05
   1  12  11   44.22   12.89
   1  12  11   26.96   13.32
   1  12  12  172.00   25.61
   1  12  12  156.21   24.55
   1  13  -6   79.44   22.47
   1  13  -6   68.06   19.51
   1  13  -5    8.16   11.61
   1  13  -5  -12.25   12.88
   1  13  -4   21.98   12.07
   1  13  -4   43.00   16.69
   1  13  -3   28.23   14.87
   1  13  -2   63.03   17.89
   1  13  -2  114.74   22.24
   1  13  -1  303.54   30.37
   1  13  -1  309.68   33.79
   1  13   0   -0.07    9.81
   1  13   0   35.22   13.41
   1  13   1   71.33   16.26
   1  13   1   53.33   15.57
   1  13   2   -8.33   10.01
   1  13   2    3.89    8.43
   1  13   3  181.71   24.04
   1  13   3  180.86   26.44
   1  13   4   -2.81    9.62
   1  13   4   22.23   12.98
   1  13   5   12.80    9.68
   1  13   5  -10.41   13.08
   1  13   6   21.18   10.35
   1  13   6    0.60    9.91
   1  13   7   52.08   14.12
   1  13   7   60.97   16.14
   1  13   8  116.57   20.85
   1  13   8   85.40   19.73
   1  13   9   23.77   13.64
   1  13   9    7.99   12.75
   1  13  10  102.13   23.00
   1  13  11  139.71   26.71
   1  13  12   -4.46   12.42
   1  14  -3   74.74   20.82
   1  14  -1  223.43   29.24
   1  14   0   33.26   14.76
   1  14   1   46.61   14.58
   1  14   2   92.82   19.74
   1  14   3   96.01   19.23
   1  14   4   44.36   14.66
  -2  14  -1  100.01   19.54
  -2  13   9   47.56   16.57
  -2  13   8   23.31   12.22
  -2  13   7  175.20   25.81
  -2  13   6    7.13   10.42
  -2  13   5  122.10   21.78
  -2  13   5  147.20   22.72
  -2  13   4  248.61   29.90
  -2  13   4  248.16   27.20
  -2  13   3   17.69   12.86
  -2  13   3    0.91    8.79
  -2  13   2   93.23   19.00
  -2  13   2   87.20   16.32
  -2  13   1   21.31   11.79
  -2  13   1   21.61   10.30
  -2  13   0   20.86    9.99
  -2  13   0   45.22   15.81
  -2  13  -1    1.73    7.93
  -2  13  -1    2.90    8.37
  -2  13  -2   16.59   11.21
  -2  13  -2    8.89   10.25
  -2  13  -3   14.19   10.63
  -2  12  10   42.92   15.75
  -2  12   9    3.72    8.15
  -2  12   9   16.96   10.79
  -2  12   8   25.97   11.02
  -2  12   8   11.35   11.75
  -2  12   7   23.10   11.80
  -2  12   7   55.42   15.72
  -2  12   6  214.08   25.19
  -2  12   6  144.58   19.96
  -2  12   5   -0.27    7.49
  -2  12   5   -1.02    9.15
  -2  12   4  495.45   37.44
  -2  12   4  477.54   34.40
  -2  12   3  196.58   24.62
  -2  12   3  244.86   24.18
  -2  12   2  228.73   23.52
  -2  12   2  249.30   27.50
  -2  12   1  124.82   20.04
  -2  12   1  151.10   19.40
  -2  12   0  108.97   19.77
  -2  12   0  128.41   18.05
  -2  12  -1    0.06    7.57
  -2  12  -1   19.48   11.68
  -2  12  -2   27.26    8.40
  -2  12  -2   28.26   11.77
  -2  12  -3   52.18   14.54
  -2  12  -3   41.24   10.87
  -2  12  -4    6.93    7.45
  -2  12  -4   12.05    9.72
  -2  12  -5   71.96   16.72
  -2  12  -5   45.77   13.09
  -2  12  -6   15.29    8.92
  -2  12  -7  134.10   22.52
  -2  12  -8   46.99   18.24
  -2  12  -9  158.60   26.63
  -2  11  12  246.78   27.60
  -2  11  11  208.58   25.47
  -2  11  11  126.59   20.11
  -2  11  10   44.29   13.87
  -2  11  10   40.64   12.64
  -2  11   9  171.64   22.22
  -2  11   9  142.66   20.00
  -2  11   8  140.89   19.37
  -2  11   8   65.82   13.98
  -2  11   7  210.92   23.60
  -2  11   7  212.75   23.08
  -2  11   6   -7.76    8.84
  -2  11   6   14.10    8.34
  -2  11   5  352.19   28.34
  -2  11   5  386.80   31.15
  -2  11   4  145.32   18.89
  -2  11   4  105.08   16.61
  -2  11   3  485.61   32.08
  -2  11   3  456.31   34.08
  -2  11   2  210.50   23.30
  -2  11   2  215.38   21.65
  -2  11   1   22.90    8.86
  -2  11   1   24.75   10.87
  -2  11   0    4.81    5.64
  -2  11   0    9.42    8.21
  -2  11  -1  492.01   30.71
  -2  11  -1  496.07   34.74
  -2  11  -2  432.45   33.00
  -2  11  -2  465.59   29.62
  -2  11  -3  201.64   19.82
  -2  11  -3  215.13   24.21
  -2  11  -4  129.45   19.12
  -2  11  -4  151.65   18.61
  -2  11  -5   31.29   11.71
  -2  11  -5   39.16   11.05
  -2  11  -6  325.53   26.22
  -2  11  -6  361.84   31.94
  -2  11  -7  117.72   19.83
  -2  11  -8   35.91   12.95
  -2  11  -9   94.11   20.71
  -2  11 -10  263.37   32.30
  -2  11 -11  190.33   27.93
  -2  11 -12  234.46   31.97
  -2  10  15  115.45   20.26
  -2  10  14    9.97    9.86
  -2  10  13   69.18   15.26
  -2  10  12  250.11   26.53
  -2  10  11   55.61   14.35
  -2  10  11   47.85   12.99
  -2  10  10  541.09   36.39
  -2  10  10  519.51   34.65
  -2  10   9   18.86    8.56
  -2  10   9   -3.52    6.22
  -2  10   8  109.09   15.58
  -2  10   8  128.03   17.87
  -2  10   7  176.22   19.79
  -2  10   7  153.23   18.88
  -2  10   6  234.66   22.67
  -2  10   6  253.88   23.37
  -2  10   5   19.52    7.97
  -2  10   5   -1.64    6.29
  -2  10   4   66.30   12.35
  -2  10   4   64.29   12.68
  -2  10   3   17.32    7.52
  -2  10   3   13.55    7.12
  -2  10   2   91.24   14.59
  -2  10   2  113.93   14.82
  -2  10   1  209.21   21.30
  -2  10   1  182.45   17.98
  -2  10   0  693.67   37.71
  -2  10   0  748.55   34.69
  -2  10  -1  130.78   17.50
  -2  10  -1  133.65   14.99
  -2  10  -2  101.77   15.44
  -2  10  -2   87.39   12.51
  -2  10  -3  231.20   19.47
  -2  10  -3  253.04   23.56
  -2  10  -4   14.84    7.14
  -2  10  -4   -2.03    7.02
  -2  10  -5  376.99   29.82
  -2  10  -5  381.51   24.81
  -2  10  -6    7.75    6.54
  -2  10  -6    7.57    8.23
  -2  10  -7  218.75   20.00
  -2  10  -7  194.26   22.30
  -2  10  -8    7.76    7.89
  -2  10  -9   48.51   13.88
  -2  10 -10   29.37   12.16
  -2  10 -11   30.25   13.86
  -2  10 -12   11.48   13.79
  -2  10 -12   -1.49   10.31
  -2  10 -13   -5.37   12.14
  -2   9  17   22.74   12.91
  -2   9  16    1.77    9.54
  -2   9  15   -5.70    8.94
  -2   9  14    0.07    7.57
  -2   9  13   -0.56    7.55
  -2   9  12  305.75   27.20
  -2   9  11  575.36   35.44
  -2   9  11  452.27   31.14
  -2   9  10    0.22    6.22
  -2   9  10   10.51    6.54
  -2   9   9  646.11   34.66
  -2   9   9  623.96   35.66
  -2   9   8   21.27    8.26
  -2   9   8   35.87    9.62
  -2   9   7  911.63   40.44
  -2   9   7  872.77   40.01
  -2   9   6  349.24   25.22
  -2   9   6  354.82   25.60
  -2   9   5   29.32    8.24
  -2   9   5   25.44    8.62
  -2   9   4  169.62   17.08
  -2   9   4  174.98   18.45
  -2   9   3    2.58    5.09
  -2   9   3   15.13    8.61
  -2   9   2  137.93   15.13
  -2   9   2  115.44   14.83
  -2   9   1   94.69   12.26
  -2   9   1   78.47   12.43
  -2   9   0  384.61   26.20
  -2   9   0  343.94   22.50
  -2   9  -1   57.28    9.44
  -2   9  -1   57.79   11.42
  -2   9  -2  540.46   30.88
  -2   9  -2  463.92   25.03
  -2   9  -3  540.99   31.37
  -2   9  -3  472.99   25.08
  -2   9  -4  298.72   23.69
  -2   9  -4  311.96   20.54
  -2   9  -5   53.72    9.31
  -2   9  -5   54.92   11.01
  -2   9  -6  565.95   27.50
  -2   9  -6  551.43   33.21
  -2   9  -7   21.47    7.65
  -2   9  -7   29.92    7.71
  -2   9  -8  297.20   26.03
  -2   9  -8  307.48   21.46
  -2   9  -9   23.11    9.25
  -2   9 -10   18.55   10.07
  -2   9 -11  161.13   22.18
  -2   9 -12    0.37    9.61
  -2   9 -13  107.23   20.20
  -2   9 -13   96.53   19.99
  -2   9 -14   38.29   12.41
  -2   8  17   41.71   14.48
  -2   8  16   87.06   17.16
  -2   8  15   12.65    9.75
  -2   8  14   52.75   13.76
  -2   8  13   -2.43    7.87
  -2   8  12  317.19   25.88
  -2   8  12  331.88   25.19
  -2   8  11  226.02   21.01
  -2   8  11  227.86   20.35
  -2   8  10  876.89   40.37
  -2   8  10  979.63   39.87
  -2   8   9   75.59   12.21
  -2   8   9   65.96   11.28
  -2   8   8 1283.44   44.70
  -2   8   8 1194.87   45.08
  -2   8   7  187.28   17.38
  -2   8   7  179.95   17.47
  -2   8   6  120.84   13.61
  -2   8   6  150.66   15.75
  -2   8   5  875.82   36.25
  -2   8   5  854.10   35.72
  -2   8   4   88.58   12.23
  -2   8   4   87.75   11.26
  -2   8   3   12.59    5.68
  -2   8   3   17.27    6.82
  -2   8   2   82.19   11.71
  -2   8   2   66.08    9.82
  -2   8   1   28.49    7.02
  -2   8   1   17.31    6.73
  -2   8   0   13.29    5.54
  -2   8   0    4.88    4.51
  -2   8  -1   92.06   12.20
  -2   8  -1   83.97   10.27
  -2   8  -2 2679.71   54.59
  -2   8  -2 2798.00   63.90
  -2   8  -3  173.31   13.89
  -2   8  -3  164.34   16.42
  -2   8  -4   90.61   13.32
  -2   8  -4   83.42   10.31
  -2   8  -5  784.84   35.72
  -2   8  -5  842.03   29.85
  -2   8  -6  162.83   17.14
  -2   8  -6  166.03   13.76
  -2   8  -7  571.05   31.76
  -2   8  -7  585.44   25.53
  -2   8  -8   50.94    8.23
  -2   8  -8   72.63   11.93
  -2   8  -9  103.63   14.74
  -2   8  -9  115.85   12.73
  -2   8 -10    4.28    5.96
  -2   8 -11  105.65   16.64
  -2   8 -12   35.16   13.97
  -2   8 -13    0.88    7.94
  -2   8 -13   21.45   12.46
  -2   8 -14   41.17   14.77
  -2   8 -14   63.33   16.10
  -2   8 -15  154.91   23.84
  -2   8 -16  139.49   23.19
  -2   7  17    4.81   10.62
  -2   7  16  353.14   28.82
  -2   7  15   11.92    7.90
   2  -7 -15   12.24    8.77
  -2   7  14   -1.44    6.92
   2  -7 -14    0.94    6.38
   2  -7 -13  227.55   19.95
  -2   7  13  235.80   22.01
   2  -7 -12   21.88    7.55
  -2   7  12   32.43    8.98
  -2   7  12   18.66    7.58
  -2   7  11  727.81   32.70
  -2   7  11  792.56   36.95
  -2   7  10  352.44   22.03
  -2   7  10  309.97   22.83
  -2   7   9   88.19   12.62
  -2   7   9   67.03    9.83
  -2   7   8  198.06   17.09
  -2   7   8  196.40   16.22
  -2   7   7  455.37   24.03
  -2   7   7  467.43   25.76
  -2   7   6  289.49   19.33
  -2   7   6  312.69   20.71
  -2   7   5  237.73   18.05
  -2   7   5  237.25   17.49
  -2   7   4  414.39   22.83
  -2   7   4  430.96   22.76
  -2   7   3 1044.44   34.58
  -2   7   3 1116.60   37.22
  -2   7   2   48.05    8.21
  -2   7   2   43.02    8.09
  -2   7   1 1092.54   37.06
  -2   7   1 1108.51   34.68
  -2   7   0   65.55    9.45
  -2   7   0   51.87    7.83
  -2   7  -1  391.72   22.49
  -2   7  -1  432.42   20.93
  -2   7  -2  809.13   32.47
  -2   7  -2  810.46   27.94
  -2   7  -3 1276.97   34.90
  -2   7  -3 1329.34   41.69
  -2   7  -4  652.75   29.53
  -2   7  -4  629.38   23.86
  -2   7  -5  588.83   22.86
  -2   7  -5  574.53   28.10
  -2   7  -6  489.59   26.52
  -2   7  -6  514.42   21.20
  -2   7  -7    0.79    3.54
  -2   7  -7    1.40    3.61
  -2   7  -8  155.92   16.15
  -2   7  -8  154.40   11.93
  -2   7  -9   58.92    7.95
  -2   7  -9   87.65   12.90
  -2   7 -10   14.69    8.26
  -2   7 -10   10.53    5.35
  -2   7 -11  142.65   17.60
  -2   7 -12  400.96   29.01
  -2   7 -13    9.09    7.19
  -2   7 -13   19.82    9.69
  -2   7 -14   51.13   14.15
  -2   7 -14   25.82   10.43
  -2   7 -15   25.92   12.44
  -2   7 -16  218.84   27.88
  -2   7 -17   94.94   19.45
  -2   6  17  331.57   28.58
  -2   6  16   34.84   10.87
   2  -6 -16   32.86   10.57
   2  -6 -15  591.96   34.90
  -2   6  15  562.58   33.09
  -2   6  14  106.25   14.63
   2  -6 -14  131.52   16.59
   2  -6 -13   24.89    8.10
  -2   6  13   16.29    6.63
   2  -6 -12  601.85   31.65
  -2   6  12  496.42   28.08
   2  -6 -11    1.63    5.59
  -2   6  11   -3.51    5.55
  -2   6  11   -0.96    5.40
  -2   6  10  139.02   14.35
   2  -6 -10  173.68   16.01
  -2   6  10  148.24   13.17
  -2   6   9   21.25    5.88
  -2   6   9   24.86    7.24
   2  -6  -9   32.37    8.26
  -2   6   8  434.58   23.83
  -2   6   8  404.84   20.63
  -2   6   8  448.22   21.88
  -2   6   7  120.21   12.66
  -2   6   7  103.64   11.38
  -2   6   7  105.01   10.74
  -2   6   6  342.39   19.82
  -2   6   6  347.78   19.15
  -2   6   5   85.09   10.01
  -2   6   5   88.53   10.23
  -2   6   4  278.02   17.04
  -2   6   4  270.70   17.25
  -2   6   3  919.38   31.11
  -2   6   3  902.92   30.04
  -2   6   2 2014.99   46.10
  -2   6   2 2005.23   43.85
  -2   6   1  196.30   14.48
  -2   6   1  195.53   13.49
  -2   6   0  169.63   13.33
  -2   6   0  192.23   13.35
  -2   6  -1 1391.41   34.21
  -2   6  -1 1326.79   37.22
  -2   6  -2  591.64   25.08
  -2   6  -2  568.10   21.66
  -2   6  -3 1090.55   34.68
  -2   6  -3 1081.30   29.15
  -2   6  -4  776.88   29.57
  -2   6  -4  799.64   24.69
  -2   6  -5   28.65    5.33
  -2   6  -5   33.94    7.30
  -2   6  -6   79.48   10.24
  -2   6  -6   97.43    8.46
  -2   6  -7  199.55   16.33
  -2   6  -7  217.44   12.54
  -2   6  -8   50.55    6.39
  -2   6  -8   41.80    8.07
  -2   6  -9  618.04   20.13
  -2   6  -9  657.84   30.43
  -2   6 -10  692.55   32.22
  -2   6 -10  634.74   20.51
  -2   6 -11   35.83    8.58
  -2   6 -12  143.39   16.05
  -2   6 -13  417.13   31.94
  -2   6 -13  440.84   28.70
  -2   6 -14   18.17    9.55
  -2   6 -14    8.83    8.43
  -2   6 -15  634.69   42.16
  -2   6 -16   87.30   18.04
  -2   6 -17  321.49   32.77
  -2   6 -18  146.67   24.42
   2  -5 -17    7.26    9.33
  -2   5  16  206.28   20.11
   2  -5 -16  170.85   20.89
   2  -5 -15    3.27    7.63
  -2   5  15   10.57    5.59
  -2   5  14  791.52   36.08
   2  -5 -14  773.34   38.83
  -2   5  13  576.69   29.82
   2  -5 -13  563.69   31.76
   2  -5 -12   24.09    8.75
  -2   5  12   28.49    6.58
  -2   5  12   10.22    5.25
  -2   5  11  445.47   20.26
   2  -5 -11  448.53   16.46
   2  -5 -11  559.95   29.22
  -2   5  11  543.00   26.93
   2  -5 -10  279.96   20.20
  -2   5  10  224.40   14.32
  -2   5  10  240.40   17.46
   2  -5 -10  253.22   13.30
  -2   5   9  417.75   16.89
   2  -5  -9  356.63   16.10
   2  -5  -9  407.25   23.32
  -2   5   9  378.69   20.94
  -2   5   9  376.14   18.20
  -2   5   8    0.43    3.46
  -2   5   8   -3.47    3.61
  -2   5   8    1.65    2.99
   2  -5  -8   -3.69    4.06
   2  -5  -8   -6.02    5.03
  -2   5   7  272.12   15.40
  -2   5   7  264.82   14.92
   2  -5  -7  318.26   19.32
   2  -5  -7  267.42   14.60
  -2   5   7  283.80   17.55
   2  -5  -6   39.91    7.78
  -2   5   6   29.04    6.30
  -2   5   6   36.52    7.12
   2  -5  -6   49.35    7.23
  -2   5   6   38.05    6.24
  -2   5   5  126.53   12.66
  -2   5   5  119.77   10.30
  -2   5   5  121.29   10.69
   2  -5  -5  129.73   11.02
  -2   5   4  296.82   15.91
  -2   5   4  310.74   20.17
  -2   5   4  282.64   16.33
  -2   5   3  125.15   10.44
  -2   5   3  134.45   10.73
  -2   5   2 1847.92   38.78
  -2   5   2 1839.73   39.20
  -2   5   1  144.75   11.38
  -2   5   1  143.75   10.65
  -2   5   0 2456.94   46.42
  -2   5   0 2479.26   42.19
  -2   5  -1 2988.97   50.90
  -2   5  -1 3011.86   45.19
  -2   5  -2  829.09   27.26
  -2   5  -2  812.91   23.03
  -2   5  -3   48.30    6.82
  -2   5  -3   49.19    5.78
  -2   5  -4  385.87   19.03
  -2   5  -5    2.94    2.84
  -2   5  -6  357.63   19.10
  -2   5  -7   29.59    4.62
  -2   5  -7   25.76    5.95
  -2   5  -8  588.49   25.74
  -2   5  -8  571.53   17.14
  -2   5  -9  113.08   12.01
  -2   5  -9  111.32    7.69
  -2   5 -10    0.76    4.70
  -2   5 -10    2.62    3.19
  -2   5 -11  918.81   35.07
  -2   5 -11  700.68   18.05
  -2   5 -12  111.12   13.16
  -2   5 -12  153.32   18.28
  -2   5 -13   31.00    8.13
  -2   5 -13   28.43    9.02
  -2   5 -14 1114.14   41.17
  -2   5 -14 1084.51   50.24
  -2   5 -15   40.27   12.12
  -2   5 -16  194.38   23.54
  -2   5 -17   15.93    9.13
  -2   5 -18    5.79    9.89
  -2   5 -19    7.48    9.84
   2  -4 -19    2.35    9.49
   2  -4 -18  112.43   19.64
   2  -4 -17  195.54   23.70
  -2   4  16    5.50    6.10
   2  -4 -16    5.18    7.00
   2  -4 -15  362.80   28.80
  -2   4  15  291.87   21.52
   2  -4 -14  261.07   23.70
  -2   4  14  240.34   18.89
  -2   4  13  665.67   29.75
   2  -4 -13  659.76   34.71
   2  -4 -12 1483.94   49.96
  -2   4  12 1370.52   40.41
   2  -4 -12 1374.92   32.28
  -2   4  11    2.12    3.59
   2  -4 -11   -5.58    7.08
  -2   4  11   -0.05    2.95
   2  -4 -11    3.17    4.36
   2  -4 -10  804.23   33.98
   2  -4 -10  770.69   24.60
  -2   4  10  763.27   28.54
   2  -4  -9   59.82    8.05
  -2   4   9   67.77    6.98
   2  -4  -9   57.16   10.16
  -2   4   9   78.29    9.47
  -2   4   9   66.27    6.65
  -2   4   8   28.54    5.05
  -2   4   8   23.29    4.67
  -2   4   8   37.81    6.71
   2  -4  -8   30.59    8.03
   2  -4  -8   29.46    6.06
  -2   4   7   14.42    4.45
   2  -4  -7   18.65    7.87
  -2   4   7   11.58    3.31
  -2   4   7    8.59    3.48
   2  -4  -7   11.84    4.10
   2  -4  -6   64.36    8.92
  -2   4   6   68.74    7.95
   2  -4  -6   81.35    8.19
   2  -4  -6   82.37    6.83
  -2   4   6   71.30    7.63
  -2   4   6   74.98    7.05
  -2   4   5  363.98   17.37
  -2   4   5  322.87   16.10
   2  -4  -5  322.79   13.04
   2  -4  -5  322.78   15.56
  -2   4   5  346.46   14.85
  -2   4   4    4.22    2.64
  -2   4   4    6.76    3.40
  -2   4   4   11.11    4.40
   2  -4  -4   13.90    4.73
   2  -4  -4   12.80    4.37
   2  -4  -4    7.86    3.93
  -2   4   3 1381.88   30.05
   2  -4  -3 1366.43   32.02
  -2   4   3 1314.05   29.87
  -2   4   2 1417.54   30.69
  -2   4   2 1388.98   29.65
   2  -4  -2 1421.02   28.13
  -2   4   2 1423.58   38.59
   2  -4  -2 1386.70   33.10
  -2   4   1  201.56   11.80
  -2   4   1  238.89   16.23
  -2   4   0 5182.07   75.05
  -2   4   0 5667.21   61.72
  -2   4  -1 1113.20   27.35
  -2   4  -2  524.80   19.46
  -2   4  -3 1075.75   28.21
  -2   4  -4    7.22    3.08
  -2   4  -5   52.98    6.72
  -2   4  -6  636.53   22.74
  -2   4  -7   20.26    4.88
  -2   4  -8    4.00    3.32
  -2   4  -9  130.13   11.54
  -2   4 -10  250.01   16.13
  -2   4 -10  331.16   23.64
  -2   4 -11  117.92   12.69
  -2   4 -11  122.09   12.04
  -2   4 -12  862.02   40.53
  -2   4 -12  907.78   32.40
  -2   4 -13 1026.99   34.65
  -2   4 -13 1041.82   45.54
  -2   4 -14   64.97   12.61
  -2   4 -14   70.79   10.71
  -2   4 -15  966.49   46.59
  -2   4 -16   43.63   12.18
  -2   4 -17  225.09   25.61
  -2   4 -18    1.40    8.31
  -2   4 -19   14.59   12.22
  -2   4 -20   63.82   17.20
   2  -3 -20  248.38   29.60
   2  -3 -19    4.50   11.07
   2  -3 -18   25.27   11.66
   2  -3 -17   16.41   10.66
   2  -3 -16    7.50   10.74
   2  -3 -15   76.37   14.52
  -2   3  15   59.87   10.06
  -2   3  14  169.31   14.91
   2  -3 -14  145.17   18.12
   2  -3 -13 1431.90   51.32
   2  -3 -13 1453.19   36.84
  -2   3  13 1548.77   42.11
   2  -3 -12   53.23    8.39
  -2   3  12   48.81    8.29
   2  -3 -11 1606.62   50.12
  -2   3  11 1635.91   40.02
   2  -3 -11 1681.18   37.65
   2  -3 -10  135.71   14.63
   2  -3 -10  162.39   11.90
  -2   3  10  155.99   11.91
   2  -3  -9  640.11   29.74
  -2   3   9  634.91   23.19
   2  -3  -9  649.15   22.48
  -2   3   8  126.06   10.25
  -2   3   8  146.70    9.18
  -2   3   8  134.08    7.90
   2  -3  -8  141.64   13.97
   2  -3  -8  144.04   10.51
   2  -3  -7 1131.76   28.51
   2  -3  -7 1117.03   35.30
  -2   3   7 1083.53   28.02
  -2   3   7 1067.26   21.96
  -2   3   7 1156.49   25.51
  -2   3   6  373.51   15.93
   2  -3  -6  353.72   16.09
  -2   3   6  409.59   15.47
  -2   3   6  390.84   13.65
   2  -3  -6  402.20   20.46
  -2   3   5  600.30   19.24
   2  -3  -5  613.08   21.03
  -2   3   5  609.67   17.14
  -2   3   5  600.07   19.54
   2  -3  -5  584.50   23.54
  -2   3   4  234.25   12.74
  -2   3   4  254.40   11.28
  -2   3   4  188.40   13.55
   2  -3  -4  207.04   12.35
   2  -3  -4  212.78   14.14
  -2   3   4  221.68   11.44
  -2   3   3 2145.56   32.39
   2  -3  -3 2177.88   38.63
   2  -3  -3 2090.44   38.80
   2  -3  -3 2209.35   29.50
   2  -3  -2   12.81    3.00
   2  -3  -2    8.51    3.53
  -2   3   2    5.93    3.59
  -2   3   2    7.28    2.30
  -2   3   2    0.67    2.08
   2  -3  -2   10.33    3.85
   2  -3  -1 2624.80   32.64
  -2   3   1 2526.94   45.40
   2  -3  -1 2608.47   41.71
  -2   3   1 2644.59   35.21
  -2   3   0  106.63    7.42
   2  -3   0   98.46    6.66
   2  -3   0  109.60    9.08
  -2   3  -1 5774.56   71.63
   2  -3   1 5537.87   65.40
   2  -3   2  323.74   12.14
  -2   3  -2  341.83   17.64
  -2   3  -2  300.80   12.47
  -2   3  -3  795.43   20.50
  -2   3  -3  855.54   27.70
   2  -3   3  825.99   19.20
  -2   3  -4  721.90   19.86
  -2   3  -4  763.84   27.42
  -2   3  -5  209.92   11.04
  -2   3  -6  572.33   18.66
  -2   3  -7  461.07   17.45
  -2   3  -8   10.31    3.57
  -2   3  -9   10.43    3.95
  -2   3  -9    8.93    6.16
  -2   3 -10   26.03    5.87
  -2   3 -10   27.15    7.57
  -2   3 -11  318.64   15.22
  -2   3 -11  366.23   18.41
  -2   3 -11  319.69   22.24
  -2   3 -12  331.16   17.67
  -2   3 -12  360.52   24.47
  -2   3 -13  135.32   11.99
  -2   3 -13  131.37   15.76
  -2   3 -14  918.91   29.77
  -2   3 -14  935.14   41.96
  -2   3 -15    6.80    5.50
  -2   3 -16  314.37   26.53
  -2   3 -17   42.13   11.83
  -2   3 -18   63.68   14.00
  -2   3 -19   14.93    9.45
  -2   3 -20   65.71   16.43
  -2   3 -21   10.86   12.11
   2  -2 -20   78.13   18.44
   2  -2 -19  149.25   21.34
   2  -2 -18   48.48   13.49
   2  -2 -17   94.09   17.34
   2  -2 -16  335.00   28.70
  -2   2  15   46.87    8.96
   2  -2 -15   70.36   13.83
  -2   2  14  233.98   16.51
   2  -2 -14  287.13   19.58
   2  -2 -14  247.90   23.13
   2  -2 -13   86.94   10.55
   2  -2 -13   90.79   13.79
  -2   2  13   93.53    9.88
  -2   2  12  378.59   18.64
   2  -2 -12  371.79   25.66
   2  -2 -12  427.91   21.31
   2  -2 -11  431.56   20.49
  -2   2  11  402.69   18.59
   2  -2 -11  384.75   24.79
   2  -2 -10  774.33   33.11
  -2   2  10  726.83   23.32
   2  -2 -10  771.84   26.22
  -2   2   9   35.82    5.66
   2  -2  -9   43.63    7.07
   2  -2  -9   35.13    7.80
   2  -2  -8  130.84   12.98
  -2   2   8  108.34    5.42
   2  -2  -8  147.38   10.90
  -2   2   8  127.51    9.23
  -2   2   7 1116.58   25.69
   2  -2  -7 1095.43   34.25
   2  -2  -7 1108.51   27.94
  -2   2   7 1093.26   17.80
  -2   2   6  498.08   16.63
  -2   2   6  546.38   17.23
  -2   2   6  471.98   12.23
   2  -2  -6  516.03   22.72
   2  -2  -6  495.49   18.43
  -2   2   5   88.39    7.15
   2  -2  -5   86.05    9.28
  -2   2   5   84.26    9.21
   2  -2  -5  100.05    8.40
  -2   2   5   81.98    6.59
  -2   2   5   90.02    5.46
   2  -2  -4 1044.82   25.47
  -2   2   4 1066.68   23.86
   2  -2  -4 1049.52   29.16
  -2   2   4 1058.89   18.63
   2  -2  -3  211.14   11.56
   2  -2  -3  211.63   12.22
  -2   2   3  202.24    8.31
  -2   2   3  215.36   11.06
  -2   2   2   71.09    7.14
  -2   2   2   60.60    4.61
  -2   2   2   63.82    6.91
   2  -2  -2   66.53    7.09
   2  -2  -2   68.86    7.43
  -2   2   1  344.04   10.76
   2  -2  -1  312.21   13.06
   2  -2  -1  348.08   15.28
  -2   2   1  359.32   14.83
  -2   2   0 4583.44   54.48
   2  -2   0 4685.57   53.09
  -2   2  -1  462.68   12.75
  -2   2  -1  508.44   18.56
  -2   2  -2   96.46    9.57
   2  -2   2  105.17    8.39
  -2   2  -2  106.93    6.42
  -2   2  -3  546.23   14.56
  -2   2  -3  558.73   20.06
  -2   2  -4 1483.91   33.43
  -2   2  -4 1469.33   24.48
  -2   2  -5 1434.24   34.35
  -2   2  -5 1314.36   23.80
  -2   2  -6   23.38    3.60
  -2   2  -6   18.34    6.32
  -2   2  -7 2069.65   41.59
  -2   2  -7 1995.96   31.87
  -2   2  -8  197.18   13.22
  -2   2  -8  161.43    9.48
  -2   2  -9 1718.79   35.95
  -2   2  -9 1677.46   31.41
  -2   2 -10  408.03   16.08
  -2   2 -10  407.01   16.75
  -2   2 -11  604.03   28.80
  -2   2 -11  589.01   20.44
  -2   2 -11  532.17   17.18
  -2   2 -12   34.73    8.29
  -2   2 -12   21.56    4.46
  -2   2 -13   13.01    5.55
  -2   2 -13   24.36    5.30
  -2   2 -14   83.20   12.20
  -2   2 -14   88.06    8.81
  -2   2 -15  398.05   26.77
  -2   2 -16   26.75    8.86
  -2   2 -17  107.00   15.35
  -2   2 -18   71.33   13.65
  -2   2 -19   19.87    9.38
  -2   2 -20   39.52   12.42
  -2   2 -21  106.60   19.32
  -2   2 -22   10.71   11.54
   2  -1 -21   70.80   18.84
   2  -1 -20   57.91   16.77
   2  -1 -19   38.60   12.93
   2  -1 -18  147.57   21.68
   2  -1 -17  354.65   30.53
   2  -1 -16  391.01   30.10
   2  -1 -15  470.39   24.07
   2  -1 -15  528.81   33.85
   2  -1 -14   22.30    7.29
   2  -1 -14   14.61    6.86
  -2   1  14   15.69    5.02
   2  -1 -13    8.30    6.49
   2  -1 -13   21.82    6.95
  -2   1  13    8.96    3.90
   2  -1 -12   66.37    9.17
  -2   1  12   57.09    7.04
   2  -1 -12   67.31   11.57
   2  -1 -11    7.03    6.46
   2  -1 -11   13.16    5.10
  -2   1  11    5.56    3.54
   2  -1 -10  285.17   20.17
   2  -1 -10  298.80   15.69
  -2   1  10  310.81   14.04
  -2   1   9   26.05    4.31
   2  -1  -9   17.20    5.99
   2  -1  -9   13.55    5.50
  -2   1   8  634.77   17.66
   2  -1  -8  657.09   21.68
   2  -1  -8  644.11   27.06
   2  -1  -7  396.87   16.17
  -2   1   7  425.90   14.22
   2  -1  -7  392.05   20.02
  -2   1   7  377.91    7.73
   2  -1  -6  754.59   26.36
  -2   1   6  816.02   12.16
   2  -1  -6  757.81   21.65
  -2   1   6  801.11   18.32
  -2   1   5 1789.09   18.80
  -2   1   5 1878.52   30.72
   2  -1  -5 1796.61   39.60
  -2   1   4  896.69   13.50
   2  -1  -4  953.49   23.26
   2  -1  -4  906.01   26.45
  -2   1   4  888.53   25.68
   2  -1  -3 6026.72   63.34
  -2   1   3 6089.31   54.10
  -2   1   3 5943.60   63.70
   2  -1  -3 5983.58   56.92
  -2   1   2   31.46    4.86
   2  -1  -2   51.05    5.83
   2  -1  -2   47.81    6.10
  -2   1   1  394.86   14.01
   2  -1  -1  377.98   14.13
   2  -1  -1  327.70   13.20
   2  -1   0  175.73    9.84
   2  -1   0  182.25    8.91
  -2   1   0  143.79    9.51
  -2   1   0  177.92    9.29
   2  -1   1  607.50   18.00
  -2   1  -1  685.91   17.70
  -2   1  -2 1036.28   24.09
   2  -1   2 1012.99   23.25
  -2   1  -5   14.97    4.09
  -2   1  -5    9.97    3.59
  -2   1  -6    2.22    3.58
  -2   1  -6    4.55    4.17
  -2   1  -7 1447.41   33.67
  -2   1  -7 1443.86   23.14
  -2   1  -7 1527.44   33.28
  -2   1  -8  338.81   11.95
  -2   1  -8  333.23   16.93
  -2   1  -8  367.85   16.71
  -2   1  -9 1484.96   37.29
  -2   1  -9 1521.64   31.38
  -2   1  -9 1643.97   27.42
  -2   1  -9 1690.31   38.92
  -2   1 -10  589.30   24.45
  -2   1 -10  598.93   19.00
  -2   1 -11  577.84   18.29
  -2   1 -11  608.90   25.88
  -2   1 -12  281.47   12.96
  -2   1 -12  322.04   19.29
  -2   1 -13  401.82   23.38
  -2   1 -13  475.24   16.47
  -2   1 -14  151.33   15.52
  -2   1 -14  157.18    9.61
  -2   1 -15   34.67    7.76
  -2   1 -16  311.44   23.38
  -2   1 -17   17.53    6.90
  -2   1 -18   34.49    9.71
  -2   1 -19   75.75   14.65
  -2   1 -20   25.97   10.84
  -2   1 -21    0.94    9.57
   2   0 -21  199.88   28.81
   2   0 -20   40.81   15.12
   2   0 -19  133.72   21.23
   2   0 -18   30.67   12.45
   2   0 -17  229.92   24.73
   2   0 -16  526.47   34.78
   2   0 -15  266.93   18.73
   2   0 -15  322.21   26.28
   2   0 -14  263.82   17.60
   2   0 -14  231.97   22.03
   2   0 -13   69.40    9.52
  -2   0  13   41.58    5.69
   2   0 -13   61.08   11.76
   2   0 -12   97.02   12.98
  -2   0  12   97.72    7.90
   2   0 -12   92.61    9.76
   2   0 -11   64.69    7.90
   2   0 -11   59.01    9.95
   2   0 -10    1.14    3.25
  -2   0  10    3.12    2.34
   2   0 -10   10.44    4.92
  -2   0   9   70.14    5.51
   2   0  -9   56.41    8.86
   2   0  -9   64.61    7.14
   2   0  -8   31.67    6.41
   2   0  -8   28.49    4.95
  -2   0   8   39.31    3.99
   2   0  -7  596.32   23.60
  -2   0   7  671.04   15.13
   2   0  -7  625.46   19.64
   2   0  -6 1239.28   32.24
   2   0  -6 1240.00   26.08
   2   0  -5   22.33    4.36
   2   0  -5   22.63    3.88
  -2   0   5   32.22    5.96
   2   0  -4 1333.13   25.83
   2   0  -4 1295.84   29.94
  -2   0   3  591.58   19.69
   2   0  -3  560.10   18.45
   2   0  -3  522.03   15.72
   2   0  -1  353.85   13.01
  -2   0   1  338.08   12.50
   2   0  -1  345.19   12.59
  -2   0   1  335.80   12.87
   2   0   0    5.46    2.29
  -2   0   0    2.14    2.33
  -2   0   0    3.20    2.33
   2   0   1 1257.62   23.25
  -2   0  -1 1284.12   23.11
  -2   0  -1 1247.89   19.62
  -2   0  -2 2923.69   35.34
   2   0   2    1.53    1.41
   2   0   3  407.93   13.62
  -2   0  -3  446.06   17.20
  -2   0  -3  432.57   14.09
  -2   0  -5   90.03    8.29
   2   0   5   92.94    9.28
  -2   0  -5   94.46    7.26
   2   0   5   89.21    7.03
  -2   0  -6 2616.36   37.94
   2   0   6 2671.73   46.44
  -2   0  -6 2690.43   42.33
  -2   0  -7  362.80   15.83
  -2   0  -7  362.61   15.17
   2   0   7  366.03   17.80
  -2   0  -8 1650.82   33.28
   2   0   8 1529.30   37.26
  -2   0  -8 1622.24   32.35
  -2   0  -8 1629.88   32.49
  -2   0  -9  189.15   11.38
  -2   0  -9  179.14   11.51
   2   0   9  170.88   13.37
  -2   0  -9  203.18   12.97
  -2   0 -10  219.88   13.46
  -2   0 -10  260.22   13.07
   2   0  10  266.15   16.82
  -2   0 -10  254.33   14.79
  -2   0 -11 1066.58   26.31
   2   0  11 1143.04   35.39
  -2   0 -11 1140.88   31.50
  -2   0 -11 1101.85   31.95
   2   0  12  136.58   13.14
  -2   0 -12  127.43   10.07
  -2   0 -12  149.95   13.10
  -2   0 -12  139.96   12.74
  -2   0 -13  240.93   12.94
  -2   0 -13  287.27   18.12
  -2   0 -14   63.19    9.50
  -2   0 -14   66.21    5.42
  -2   0 -15   52.42    9.61
  -2   0 -16   78.06   12.57
  -2   0 -17  143.31   16.75
  -2   0 -18  112.15   16.76
  -2   0 -19   98.18   16.08
  -2   0 -20   26.34   11.53
   2   1 -20   56.92   17.11
   2   1 -19   18.89   10.70
   2   1 -18  254.79   28.93
   2   1 -17  123.90   18.95
   2   1 -16  241.60   18.15
   2   1 -16  298.03   26.45
   2   1 -15  677.14   37.11
   2   1 -15  638.61   28.18
   2   1 -14  217.47   20.45
   2   1 -14  182.54   14.92
   2   1 -13  696.67   34.68
   2   1 -13  687.54   26.91
   2   1 -12  526.31   22.39
   2   1 -12  550.13   29.45
  -2  -1  11   -1.17    1.51
   2   1 -11    1.79    3.14
  -2  -1  10   77.30    4.78
   2   1 -10   98.55    9.29
   2   1 -10   94.69   11.57
   2   1  -9  762.23   29.45
   2   1  -9  770.62   23.48
  -2  -1   9  796.23   14.32
   2   1  -8  186.53   11.33
   2   1  -8  187.41   13.98
  -2  -1   8  212.65    7.07
  -2  -1   8  190.32    6.10
   2   1  -7  265.11   15.69
  -2  -1   7  231.60    7.67
   2   1  -7  255.91   12.65
  -2  -1   7  276.87    7.82
   2   1  -6  175.08   12.21
  -2  -1   6  191.97    7.78
   2   1  -6  209.79   10.98
  -2  -1   5  255.79   14.63
   2   1  -5  219.73   12.62
   2   1  -5  214.53   10.61
   2   1  -4  140.06    9.51
  -2  -1   4  129.09    9.56
  -2  -1   4  108.13    6.94
   2   1  -4  133.49    8.03
   2   1  -3  969.10   22.75
   2   1  -3  911.41   19.72
   2   1  -2 1638.36   25.69
   2   1  -2 1648.58   27.63
  -2  -1   1   -0.30    1.95
   2   1   0  209.04   11.08
   2   1   0  183.71    8.39
  -2  -1   0  192.54    8.24
  -2  -1   0  211.47    9.37
  -2  -1   0  228.72   12.39
  -2  -1  -1  412.85   12.27
  -2  -1  -1  437.00   17.34
   2   1   1  443.75   16.29
  -2  -1  -1  458.32   11.22
  -2  -1  -2    7.33    1.89
  -2  -1  -2   -0.13    3.50
  -2  -1  -2    6.93    2.66
   2   1   2    0.81    0.95
   2   1   2   10.07    4.02
   2   1   3 1602.55   31.57
  -2  -1  -3 1596.23   23.03
  -2  -1  -3 1631.14   15.31
  -2  -1  -4 1361.01   21.51
   2   1   4 1361.03   21.69
   2   1   4 1372.65   29.84
  -2  -1  -5 1441.55   29.84
  -2  -1  -5 1350.46   21.89
   2   1   5 1411.57   22.18
   2   1   5 1322.72   29.99
  -2  -1  -6  286.99   10.59
  -2  -1  -6  297.08   13.68
  -2  -1  -6  243.13    9.09
   2   1   6  286.23   14.67
  -2  -1  -7    0.39    3.34
  -2  -1  -7    3.72    2.11
   2   1   7    3.72    3.10
  -2  -1  -7    4.44    2.38
  -2  -1  -8   73.77    6.41
   2   1   8   63.28    8.22
  -2  -1  -8   74.58    6.82
  -2  -1  -8   76.69    7.70
   2   1   9  398.41   19.33
  -2  -1  -9  431.44   15.76
  -2  -1  -9  406.01   16.46
  -2  -1  -9  387.05   15.44
  -2  -1 -10  123.23    9.44
   2   1  10  128.49   12.01
  -2  -1 -10  130.13   10.19
  -2  -1 -10  140.48    9.81
   2   1  11  812.95   29.80
  -2  -1 -11  783.37   25.32
  -2  -1 -11  873.32   24.16
  -2  -1 -11  853.31   24.67
  -2  -1 -11  794.93   24.07
   2   1  12  830.21   31.48
  -2  -1 -12  803.51   22.66
  -2  -1 -12  720.66   23.89
  -2  -1 -12  813.55   27.97
  -2  -1 -12  766.70   23.72
  -2  -1 -13   57.58    8.58
  -2  -1 -13   51.48    6.19
   2   1  13   71.23   10.37
  -2  -1 -13   57.37    7.79
  -2  -1 -13   61.30    5.07
   2   1  14  446.17   24.97
  -2  -1 -14  423.11   22.75
   2   1  15  116.02   15.27
  -2  -1 -15  159.93   14.99
   2   1  16   22.66    7.82
  -2  -1 -16   47.47    9.79
  -2  -1 -17    7.84    5.42
  -2  -1 -18   43.02   10.36
  -2  -1 -19   72.43   13.50
  -2  -1 -20   53.22   13.47
   2   2 -20   89.25   19.48
   2   2 -19  204.25   26.31
   2   2 -18   -0.72    7.99
   2   2 -17   21.15    8.76
   2   2 -17   18.18    9.34
   2   2 -16   22.01    6.42
   2   2 -16    6.53    6.75
   2   2 -15   55.09    9.43
   2   2 -15   60.13   12.08
   2   2 -14  267.39   18.34
   2   2 -14  278.68   23.53
   2   2 -13   -1.90    4.42
   2   2 -13   12.25    6.35
   2   2 -12  344.30   23.80
   2   2 -12  333.10   19.27
   2   2 -11  716.14   32.59
  -2  -2  10  609.92   12.14
   2   2 -10  501.43   25.96
  -2  -2   9  133.31    6.48
   2   2  -9  115.91   12.32
  -2  -2   8 1435.83   22.65
   2   2  -8 1228.93   36.64
   2   2  -7  897.58   30.01
  -2  -2   7  925.77   19.06
   2   2  -6  186.43   12.97
   2   2  -6  155.00    9.90
   2   2  -5  285.07   13.30
   2   2  -5  341.35   16.20
  -2  -2   4 1633.52   28.18
  -2  -2   4 1742.66   26.14
   2   2  -4 1675.90   33.43
   2   2  -3  351.57   14.24
  -2  -2   3  248.24   11.39
  -2  -2   3  300.43   12.78
   2   2  -3  163.99   10.31
  -2  -2   3  392.10   15.46
   2   2  -2  583.61   17.70
   2   2  -2  694.16   18.27
  -2  -2   2  837.95   21.02
  -2  -2   2  831.08   20.75
   2   2  -2  663.56   19.46
  -2  -2   1  439.36   13.77
   2   2  -1  372.13   15.20
   2   2  -1  402.20   12.58
  -2  -2   0 1736.05   23.82
   2   2   0 1397.07   27.75
  -2  -2   0 1437.07   28.64
   2   2   0 1471.06   20.99
   2   2   0 1687.15   32.10
   2   2   1 6725.40   59.64
   2   2   2 6695.70   63.61
  -2  -2  -2 7367.66   69.36
   2   2   3  184.68   12.05
   2   2   3  173.46    7.35
  -2  -2  -3  204.89   11.94
  -2  -2  -3  176.56   10.06
  -2  -2  -4 2593.90   39.02
   2   2   4 2565.16   41.51
   2   2   4 2600.65   26.99
  -2  -2  -6 1300.01   29.04
  -2  -2  -6 1306.29   29.80
   2   2   6 1224.17   30.36
  -2  -2  -6 1150.82   16.59
  -2  -2  -6 1074.27   14.87
  -2  -2  -7  901.48   24.45
   2   2   7  883.91   27.48
  -2  -2  -7  811.70   13.16
  -2  -2  -7  846.41   16.79
   2   2   8  764.01   26.70
  -2  -2  -8  695.62   12.90
  -2  -2  -8  705.95   22.75
  -2  -2  -8  694.51   17.60
  -2  -2  -9 1370.53   32.41
  -2  -2  -9 1302.83   26.95
  -2  -2  -9 1312.75   18.81
  -2  -2  -9 1480.65   30.75
   2   2   9 1527.61   40.36
   2   2  10  842.82   30.75
  -2  -2 -10  768.59   22.96
  -2  -2 -10  756.11   15.46
  -2  -2 -10  752.77   22.29
  -2  -2 -11 1447.77   34.59
  -2  -2 -11 1410.01   22.80
  -2  -2 -11 1538.72   31.07
   2   2  11 1481.05   41.01
   2   2  12   32.15    7.50
  -2  -2 -12   42.25    6.07
  -2  -2 -12   37.33    4.50
  -2  -2 -12   41.72    6.41
  -2  -2 -13 1063.32   22.69
  -2  -2 -13 1103.10   34.58
  -2  -2 -13 1076.19   22.45
   2   2  13 1160.27   38.69
  -2  -2 -14   -0.62    2.28
  -2  -2 -14    7.19    5.46
   2   2  14    0.46    5.16
  -2  -2 -15   11.36    6.11
   2   2  15   19.17    8.28
   2   2  16  181.47   18.62
  -2  -2 -16  222.46   19.23
  -2  -2 -17  416.33   27.46
   2   2  17  206.36   20.28
  -2  -2 -18    3.54    7.39
  -2  -2 -19   66.46   14.23
   2   3 -19   41.97   14.08
   2   3 -18    1.16    8.45
   2   3 -17   11.88    6.30
   2   3 -17   14.50   10.53
   2   3 -16    4.25    4.99
   2   3 -16    5.43    7.61
   2   3 -15   42.85    8.90
   2   3 -15   27.24    9.68
   2   3 -14    1.08    5.32
   2   3 -13  272.20   22.92
   2   3 -12  761.79   36.70
   2   3 -11    8.06    5.38
   2   3 -10 1631.16   48.30
  -2  -3  10 1640.91   26.65
  -2  -3   9 1235.36   24.82
   2   3  -9 1124.46   38.59
   2   3  -9 1230.56   31.94
   2   3  -8  123.81   12.39
   2   3  -8  124.15   10.55
  -2  -3   8  133.54    8.71
  -2  -3   7 2112.69   33.53
   2   3  -7 1999.86   40.55
   2   3  -7 1984.44   45.55
  -2  -3   6    4.79    2.79
   2   3  -6   13.65    4.71
  -2  -3   6    4.09    0.99
   2   3  -6    9.98    4.39
  -2  -3   5 1098.06   15.55
  -2  -3   5 1008.55   24.43
   2   3  -5 1043.57   30.25
   2   3  -5  989.40   27.01
  -2  -3   4   35.74    3.52
   2   3  -4   27.62    4.92
   2   3  -4   30.97    4.41
  -2  -3   4   30.40    5.57
   2   3  -4   23.64    5.48
   2   3  -3  197.00   11.39
  -2  -3   3  201.97    8.66
   2   3  -3  184.99   10.06
   2   3  -3  213.68   12.42
  -2  -3   3  216.16   11.78
  -2  -3   2    4.44    2.18
   2   3  -2    8.63    3.07
   2   3  -2    8.09    2.86
  -2  -3   2    1.91    2.06
   2   3  -2   10.03    3.52
   2   3  -1 1551.59   26.90
   2   3  -1 1535.70   32.82
  -2  -3   1 1570.59   27.32
   2   3   0    4.10    2.95
   2   3   0    2.44    1.40
  -2  -3   0    4.76    3.28
   2   3   0    2.47    2.27
   2   3   1  112.57    5.83
   2   3   1  121.79    9.53
  -2  -3  -1   98.62    9.07
   2   3   1  108.21    8.12
  -2  -3  -2 2751.18   38.55
   2   3   2 2861.79   46.63
  -2  -3  -2 2792.80   42.60
   2   3   2 2768.70   41.26
   2   3   2 2676.76   24.32
   2   3   3 3233.53   46.49
  -2  -3  -3 3370.90   48.02
  -2  -3  -3 3338.80   43.73
  -2  -3  -4   -0.47    2.86
   2   3   4    2.90    2.65
   2   3   4    5.98    1.88
  -2  -3  -4    7.10    3.31
   2   3   4    9.24    3.42
  -2  -3  -5  894.05   24.33
   2   3   5  906.79   26.21
   2   3   5  949.59   15.57
  -2  -3  -5  957.78   25.52
   2   3   5  998.10   28.64
  -2  -3  -6  418.60    8.37
  -2  -3  -6  634.57   21.72
   2   3   6  356.92    6.94
  -2  -3  -6  663.10   21.64
   2   3   6  557.78   10.23
   2   3   6  602.21   22.29
  -2  -3  -7 2058.18   24.29
  -2  -3  -7 2187.01   38.88
   2   3   7 2033.97   42.17
  -2  -3  -8  279.55   10.72
   2   3   8  223.87   14.88
  -2  -3  -8  271.06   14.49
   2   3   9  310.41   17.61
  -2  -3  -9  344.21   15.74
  -2  -3  -9  348.14   13.97
  -2  -3 -10  191.65   11.91
  -2  -3 -10  203.04   11.98
  -2  -3 -11   22.77    5.75
   2   3  11   20.81    6.33
   2   3  12  149.83   14.99
  -2  -3 -12  163.65   12.98
  -2  -3 -12  159.91   10.37
   2   3  13  360.71   24.73
  -2  -3 -13  315.95   13.48
  -2  -3 -13  340.48   19.90
   2   3  14  114.51   14.49
  -2  -3 -14   85.69   11.28
   2   3  15  459.48   28.06
  -2  -3 -15  419.87   24.91
   2   3  16  133.44   16.09
  -2  -3 -16  156.69   17.15
   2   3  17  130.79   17.07
  -2  -3 -17  159.05   17.59
   2   4 -18  112.43   20.26
   2   4 -18   45.81   11.71
   2   4 -17  117.16   16.28
   2   4 -17  178.12   23.67
   2   4 -16   87.76   16.35
   2   4 -16   77.70   13.22
   2   4 -15   13.88    8.64
   2   4 -14   16.63    8.40
   2   4 -13   22.68    8.41
   2   4 -12   33.79    9.38
   2   4 -11  604.65   25.94
   2   4 -11  512.66   29.78
   2   4 -10   77.26   11.39
   2   4 -10   82.01   11.13
  -2  -4   9  459.10   17.76
   2   4  -9  471.54   22.62
   2   4  -9  463.93   25.73
  -2  -4   8 1510.84   32.43
   2   4  -8 1518.35   38.70
  -2  -4   7  435.23   17.68
   2   4  -7  486.58   24.45
   2   4  -7  453.22   21.38
   2   4  -6 2122.29   47.80
   2   4  -6 2031.69   43.21
  -2  -4   6 2111.02   20.07
   2   4  -5    3.90    3.22
  -2  -4   5    6.47    1.98
  -2  -4   5   12.04    3.78
   2   4  -5    5.24    3.38
   2   4  -5    7.35    4.44
  -2  -4   4  214.02    8.83
   2   4  -4  201.01   11.12
  -2  -4   4  179.39   12.19
   2   4  -4  220.38   14.13
   2   4  -4  226.36   14.95
   2   4  -3  757.84   24.74
  -2  -4   3  672.64   22.31
   2   4  -3  805.20   27.17
  -2  -4   3  828.37   18.64
   2   4  -3  905.91   24.70
  -2  -4   2  217.09   10.15
   2   4  -2  198.33   11.38
  -2  -4   2  238.80   13.44
   2   4  -2  214.06   14.47
   2   4  -2  225.34   12.55
   2   4  -1 1925.25   41.05
  -2  -4   1 1789.46   29.85
   2   4  -1 1851.74   34.47
   2   4  -1 1986.59   34.94
   2   4   0    3.79    2.95
   2   4   0    5.96    2.69
   2   4   0   10.08    3.50
  -2  -4   0    2.02    2.70
  -2  -4   0   12.47    3.30
  -2  -4  -1 1240.42   29.99
   2   4   1 1252.12   29.41
   2   4   1 1313.77   33.53
   2   4   2 1074.65   28.12
  -2  -4  -2  959.38   26.76
   2   4   2 1035.64   30.24
   2   4   3 2482.37   43.43
  -2  -4  -3 2328.94   41.88
   2   4   3 2456.45   46.59
  -2  -4  -3 2406.51   39.83
   2   4   4 1928.54   40.40
  -2  -4  -4 1914.48   37.96
   2   4   5 1019.54   16.76
   2   4   5 1046.42   30.40
   2   4   6 2068.62   44.09
   2   4   6 2142.28   22.93
   2   4   6 2108.49   20.69
  -2  -4  -6 2082.51   39.58
   2   4   7  564.61   23.76
  -2  -4  -7  566.35   20.86
   2   4   7  601.56   11.74
   2   4   8   83.69    5.10
  -2  -4  -8   77.63    8.27
  -2  -4  -8   95.08    5.76
   2   4   8   89.83   10.11
   2   4   8   76.15    9.75
  -2  -4  -9   34.39    6.58
   2   4   9   28.65    3.62
  -2  -4  -9   36.85    4.47
   2   4   9   37.58    7.19
  -2  -4 -10  354.75   14.22
   2   4  10  327.99   20.50
  -2  -4 -10  344.61   16.60
   2   4  10  373.05   13.03
  -2  -4 -11    2.18    4.34
  -2  -4 -11    6.92    3.73
   2   4  11   -1.45    5.01
  -2  -4 -12  132.60   11.26
  -2  -4 -12  131.16   10.70
   2   4  12  127.02   14.23
  -2  -4 -13   90.62   10.07
   2   4  13   94.22   12.85
  -2  -4 -14    5.53    5.94
   2   4  14   10.83    6.74
  -2  -4 -15   56.69   10.12
   2   4  15   38.54    9.87
   2   4  16  586.02   35.02
  -2  -4 -16  506.22   27.73
   2   4  17  198.70   21.21
   2   4  18  207.17   21.89
   2   5 -18  196.82   26.70
   2   5 -18  167.09   19.94
   2   5 -17  107.11   19.51
   2   5 -16   38.11   12.11
   2   5 -15   16.89    9.98
   2   5 -14  111.01   16.99
   2   5 -13  149.25   18.69
   2   5 -12   13.74    7.31
   2   5 -12   20.15    8.00
   2   5 -11  532.78   31.57
   2   5 -11  607.49   30.19
   2   5 -10   -3.50    5.48
   2   5 -10    6.95    5.51
   2   5  -9 1465.22   43.64
   2   5  -9 1470.77   49.31
   2   5  -8 1056.61   40.03
   2   5  -8 1015.35   35.31
   2   5  -7 1190.11   38.30
   2   5  -7 1144.76   38.91
   2   5  -6    9.64    4.59
   2   5  -6   15.88    5.75
   2   5  -6    7.78    5.08
   2   5  -5  854.02   31.56
   2   5  -5  860.94   31.96
   2   5  -5  785.06   23.29
  -2  -5   5  869.18   18.34
   2   5  -4  316.59   16.01
   2   5  -4  260.08   17.76
   2   5  -4  316.03   18.33
  -2  -5   4  274.58   11.25
   2   5  -3   80.40    9.33
  -2  -5   3   85.23    6.73
   2   5  -3   84.56    8.32
   2   5  -3   91.20   10.73
  -2  -5   2 1946.59   33.06
   2   5  -2 1966.89   47.03
   2   5  -2 1934.25   37.91
   2   5  -1  903.23   26.53
   2   5  -1  910.66   31.39
  -2  -5   1  838.17   22.50
  -2  -5   0  337.49   14.71
   2   5   0  330.54   16.67
   2   5   0  352.68   19.76
   2   5   1   12.43    4.49
   2   5   1   14.80    4.60
   2   5   2   68.66    8.71
   2   5   2   83.00   10.01
   2   5   3  511.98   22.22
   2   5   3  500.62   23.61
   2   5   4   20.15    5.17
   2   5   4   18.06    5.34
   2   5   5 5214.48   73.32
   2   5   5 5097.80   48.91
   2   5   5 5147.52   74.26
   2   5   6  136.47    7.32
   2   5   6  140.54   13.13
   2   5   6  170.38   13.98
   2   5   7 1131.38   17.31
   2   5   7 1185.57   20.87
   2   5   7 1199.11   37.18
   2   5   8  641.47   14.98
   2   5   8  655.54   28.38
   2   5   8  728.04   28.89
   2   5   9    3.68    3.85
   2   5   9    4.45    2.27
   2   5   9    7.91    5.63
   2   5  10 1133.97   39.27
   2   5  10 1124.06   21.52
  -2  -5 -10 1122.15   22.45
   2   5  11   18.06    3.66
  -2  -5 -11   26.87    4.90
   2   5  11   29.46    8.19
  -2  -5 -12   95.17    8.68
   2   5  12   94.58   12.90
   2   5  12   77.74    7.21
  -2  -5 -13   46.66    7.35
   2   5  13   53.69   10.48
  -2  -5 -14  581.39   23.32
   2   5  14  675.86   33.75
  -2  -5 -15   94.87   11.14
   2   5  15  108.18   15.50
   2   5  16   35.44   10.63
   2   5  17  344.90   30.46
   2   5  18  133.15   19.24
   2   5  19   -0.96    8.73
   2   6 -18   15.33   10.32
   2   6 -17   12.39    8.76
   2   6 -16   14.02    9.47
   2   6 -15  285.02   28.52
   2   6 -14   44.87   12.87
   2   6 -13  182.63   21.46
   2   6 -12   46.70   12.51
   2   6 -12   33.28    9.65
   2   6 -11    6.05    6.94
   2   6 -11   -0.50    6.34
   2   6 -10  202.99   18.91
   2   6 -10  190.78   20.02
   2   6  -9  809.88   38.53
   2   6  -9  806.67   35.16
   2   6  -8  106.25   13.36
   2   6  -8   78.58   11.85
   2   6  -7  203.37   18.14
   2   6  -7  203.01   12.83
   2   6  -7  208.36   18.78
   2   6  -6  622.94   22.31
   2   6  -6  731.11   32.71
   2   6  -6  694.56   31.90
   2   6  -5   10.63    5.65
  -2  -6   5    9.43    2.63
   2   6  -5    2.35    5.04
   2   6  -5    6.30    5.18
   2   6  -4  888.10   35.24
  -2  -6   4  842.36   21.98
   2   6  -4  845.54   26.97
   2   6  -3  901.46   28.16
   2   6  -3  917.00   35.32
   2   6  -3  986.42   33.65
   2   6  -2   75.44    8.89
   2   6  -2   74.57   10.71
   2   6  -1   92.82   11.73
   2   6  -1   86.25    9.78
   2   6   0 1475.07   43.97
   2   6   0 1457.16   37.55
   2   6   1   13.31    4.54
   2   6   1   17.44    5.54
   2   6   2 1576.27   44.98
   2   6   2 1610.62   41.53
   2   6   3  161.38   13.88
   2   6   3  149.07   15.03
   2   6   4 2608.71   55.63
   2   6   4 2683.09   59.70
   2   6   5   86.95   11.47
   2   6   5   92.90   10.63
   2   6   5   76.62   10.55
   2   6   6 2328.13   39.96
   2   6   6 2389.38   55.90
   2   6   7  568.69   27.82
   2   6   7  542.14   17.87
   2   6   7  528.75   26.37
   2   6   8  703.69   31.75
   2   6   8  659.71   14.02
   2   6   8  725.37   19.15
   2   6   9  247.27   19.08
   2   6   9  259.20   19.51
   2   6   9  215.23   10.29
   2   6  10   -1.60    5.05
   2   6  10    1.55    2.23
   2   6  10    7.61    6.44
   2   6  11  684.66   18.71
   2   6  11  734.30   34.69
   2   6  11  778.58   34.23
   2   6  12  192.89   18.24
   2   6  13  389.41   26.74
   2   6  14  530.81   31.72
   2   6  15   71.54   13.28
   2   6  16   41.86   12.74
   2   6  17   49.82   12.78
   2   6  18  193.18   24.94
   2   6  19  255.97   28.71
   2   7 -16   63.12   16.90
   2   7 -15  103.54   19.48
   2   7 -14  499.28   38.03
   2   7 -13    1.13    7.33
   2   7 -12  701.26   41.74
   2   7 -11  212.68   21.54
   2   7 -11  173.27   21.21
   2   7 -10  492.48   31.11
   2   7 -10  479.37   32.60
   2   7  -9  645.93   35.29
   2   7  -9  604.25   34.09
   2   7  -8   30.93    8.96
   2   7  -8   53.87   11.92
   2   7  -7  161.44   17.68
   2   7  -7  161.39   13.33
   2   7  -7  166.03   18.02
   2   7  -6  103.90   13.77
   2   7  -6   93.67   11.14
   2   7  -6   99.85   13.41
   2   7  -5  480.65   27.43
   2   7  -5  424.88   21.63
   2   7  -5  419.37   27.02
   2   7  -4   -0.58    4.12
   2   7  -4    4.90    4.49
   2   7  -4    6.27    6.08
   2   7  -3  238.55   20.71
   2   7  -3  219.14   16.07
   2   7  -3  232.14   17.94
   2   7  -2  277.01   17.91
   2   7  -2  291.40   21.68
   2   7  -1  360.65   24.06
   2   7  -1  353.75   20.37
   2   7   0  862.84   32.24
   2   7   0  824.90   36.07
   2   7   1 1806.17   47.17
   2   7   1 1899.20   53.94
   2   7   2    3.24    4.43
   2   7   2    7.36    5.57
   2   7   3  739.90   31.13
   2   7   3  724.79   33.45
   2   7   4   13.62    6.03
   2   7   4   18.83    7.22
   2   7   5 1558.37   47.37
   2   7   5 1613.40   49.87
   2   7   6  456.31   26.20
   2   7   6  471.96   26.64
   2   7   6  485.76   23.46
   2   7   7  232.77   19.56
   2   7   7  240.54   19.72
   2   7   7  197.56   14.37
   2   7   8  138.97   15.89
   2   7   8  123.51   14.55
   2   7   8  116.55   10.71
   2   7   9  506.99   18.49
   2   7   9  480.99   12.78
   2   7   9  548.39   30.22
   2   7   9  566.79   30.70
   2   7  10   17.42    7.14
   2   7  10   40.91    9.39
   2   7  11  574.25   32.64
   2   7  11  592.79   32.74
   2   7  12  242.44   21.24
   2   7  12  244.79   22.12
   2   7  13  575.96   33.79
   2   7  14  115.61   16.51
   2   7  15  186.15   21.50
   2   7  16  473.48   33.24
   2   7  17   23.73   10.75
   2   7  18  243.14   27.21
   2   7  19   58.07   18.66
   2   8 -14   -2.74    8.39
   2   8 -13  202.33   24.69
   2   8 -12  148.63   21.57
   2   8 -11  385.40   32.12
   2   8 -11  333.82   28.55
   2   8 -10 1051.13   50.13
   2   8 -10 1068.89   49.23
   2   8  -9  157.57   19.24
   2   8  -9  143.89   18.88
   2   8  -8   93.00   15.53
   2   8  -8  120.48   17.03
   2   8  -7  314.13   25.44
   2   8  -7  321.57   20.04
   2   8  -7  327.88   27.01
   2   8  -6  341.17   25.69
   2   8  -6  320.72   25.75
   2   8  -6  364.47   22.73
   2   8  -5  214.77   21.64
   2   8  -5  216.69   17.07
   2   8  -5  245.23   21.42
   2   8  -4   20.15    7.43
   2   8  -4   10.10    6.35
   2   8  -4    9.80    6.35
   2   8  -3   82.13   10.98
   2   8  -3   89.48   13.54
   2   8  -2   46.92    9.97
   2   8  -2   40.95   10.03
   2   8  -1 1050.79   37.63
   2   8  -1 1020.09   43.98
   2   8   0 1062.39   43.93
   2   8   0 1127.21   39.99
   2   8   1  951.95   37.39
   2   8   1  986.84   41.93
   2   8   2 1330.19   49.20
   2   8   2 1357.71   44.90
   2   8   3  604.16   30.93
   2   8   3  596.87   32.84
   2   8   4  195.63   17.98
   2   8   4  190.55   19.62
   2   8   5 1046.20   43.58
   2   8   5  944.79   39.51
   2   8   6 1054.36   42.59
   2   8   6  947.65   40.12
   2   8   6  960.68   40.96
   2   8   7   42.61   10.72
   2   8   7   36.65    9.56
   2   8   7   42.02    9.10
   2   8   8  185.91   18.92
   2   8   8  149.92   17.22
   2   8   9  206.02   20.22
   2   8   9  144.20    7.99
   2   8   9  198.49   19.73
   2   8  10   20.57    9.33
   2   8  10   39.44   10.00
   2   8  11  102.42   15.37
   2   8  11   91.30   14.75
   2   8  12  298.31   25.93
   2   8  12  290.41   25.69
   2   8  13   12.06    7.21
   2   8  13    8.05    8.19
   2   8  14  990.26   46.97
   2   8  15  567.27   37.39
   2   8  16   27.06   11.30
   2   8  17  381.18   32.75
   2   8  18   -1.38   11.01
   2   8  19  161.21   24.33
   2   8  20   24.33   16.36
   2   9 -13   38.02   13.01
   2   9 -12 1050.93   56.28
   2   9 -11  230.92   26.53
   2   9 -11  265.74   27.87
   2   9 -10  434.59   33.91
   2   9 -10  403.33   33.88
   2   9  -9  233.67   24.26
   2   9  -9  263.50   27.53
   2   9  -8  152.63   19.89
   2   9  -8  139.92   20.29
   2   9  -7  141.14   18.17
   2   9  -7  126.01   19.39
   2   9  -6   16.33    9.11
   2   9  -6   28.88    9.90
   2   9  -6   18.00   10.06
   2   9  -5    4.37    6.57
   2   9  -5   11.86    7.88
   2   9  -5   14.45    8.58
   2   9  -4   49.86   11.35
   2   9  -4   31.43    8.98
   2   9  -4   44.90   11.88
   2   9  -3   18.92    7.28
   2   9  -3   17.39    8.94
   2   9  -2  244.00   20.16
   2   9  -2  252.42   24.18
   2   9  -1   95.43   12.63
   2   9  -1   62.29   12.64
   2   9   0 1062.12   42.09
   2   9   0 1105.78   48.27
   2   9   1  462.49   28.29
   2   9   1  486.44   32.00
   2   9   2   95.91   14.33
   2   9   2   99.51   15.62
   2   9   3 1468.56   51.40
   2   9   3 1454.97   54.78
   2   9   4   15.79    6.87
   2   9   4    9.66    6.94
   2   9   5  121.33   15.99
   2   9   5  125.84   16.04
   2   9   6    4.29    6.82
   2   9   6    2.68    6.33
   2   9   7   83.01   13.51
   2   9   7   81.61   13.54
   2   9   8   26.91    8.66
   2   9   8   27.59    9.11
   2   9   9   12.82    8.19
   2   9   9   13.26    7.56
   2   9  10   68.79   13.44
   2   9  10   64.48   12.92
   2   9  11   -2.39    6.88
   2   9  11   20.80    9.57
   2   9  12    5.78    6.36
   2   9  12   11.61    9.94
   2   9  13  905.51   46.69
   2   9  13  800.05   43.60
   2   9  14    0.19    6.75
   2   9  15  258.46   26.23
   2   9  16  451.22   36.06
   2   9  17   62.41   15.99
   2   9  18   41.20   14.44
   2   9  19    9.16   10.95
   2  10 -12   10.60   11.80
   2  10 -11  104.83   20.29
   2  10 -11   74.43   19.20
   2  10 -10   22.43   10.82
   2  10 -10   48.59   15.63
   2  10  -9   12.13    9.22
   2  10  -9   10.96    9.04
   2  10  -8  352.76   32.03
   2  10  -8  324.66   31.76
   2  10  -7   35.07   11.72
   2  10  -7   37.96   11.64
   2  10  -6    0.05    6.83
   2  10  -6   11.93    8.69
   2  10  -5  468.30   33.81
   2  10  -5  434.21   34.43
   2  10  -5  368.49   26.55
   2  10  -4  159.08   21.25
   2  10  -4  189.81   21.23
   2  10  -4  171.39   19.14
   2  10  -3  142.11   20.05
   2  10  -3  158.60   19.06
   2  10  -3  125.43   16.11
   2  10  -2   87.84   15.87
   2  10  -2   82.78   13.96
   2  10  -1   22.31    8.03
   2  10  -1    1.93    6.35
   2  10   0    8.98    6.29
   2  10   0    1.16    6.12
   2  10   1   26.59    8.58
   2  10   1   22.68    9.64
   2  10   2 1466.88   53.39
   2  10   2 1393.35   58.22
   2  10   3   21.92    9.41
   2  10   3   23.50    8.51
   2  10   4  798.74   40.60
   2  10   4  814.87   44.62
   2  10   5  109.84   15.82
   2  10   5  114.44   17.93
   2  10   6   52.28   13.03
   2  10   6   36.42   11.16
   2  10   7  254.11   24.08
   2  10   7  227.43   23.05
   2  10   8   25.42    9.40
   2  10   8   48.06   11.98
   2  10   9   62.32   13.17
   2  10   9   83.00   15.15
   2  10  10  202.56   23.01
   2  10  10  262.25   25.92
   2  10  11   -6.37    7.93
   2  10  11    2.55    7.45
   2  10  12  227.59   24.35
   2  10  12  248.70   26.20
   2  10  13   18.78   10.62
   2  10  13   24.57   13.84
   2  10  14  103.31   17.94
   2  10  14   86.44   18.87
   2  10  15   60.29   15.26
   2  10  16  467.23   38.33
   2  10  17   48.66   15.35
   2  11 -10  149.19   24.09
   2  11 -10  154.85   26.67
   2  11  -9   13.83   10.69
   2  11  -9    6.10   10.40
   2  11  -8   13.18   10.36
   2  11  -8   17.59   12.90
   2  11  -7  128.58   22.01
   2  11  -7  182.57   24.09
   2  11  -6  279.36   30.64
   2  11  -6  244.27   27.59
   2  11  -5  131.47   19.54
   2  11  -5  101.87   18.94
   2  11  -4  181.45   22.05
   2  11  -4  177.47   21.40
   2  11  -4  177.37   24.36
   2  11  -3  520.28   34.25
   2  11  -3  536.12   39.78
   2  11  -3  616.32   38.72
   2  11  -2   12.42    7.67
   2  11  -2   26.17   12.62
   2  11  -1  528.59   34.48
   2  11  -1  466.13   36.81
   2  11   0   30.78   10.60
   2  11   0   10.45    9.52
   2  11   1  280.85   24.86
   2  11   1  311.61   29.74
   2  11   2   62.80   12.92
   2  11   2   50.35   13.31
   2  11   3  400.27   30.21
   2  11   3  347.78   31.76
   2  11   4   56.27   12.65
   2  11   4   76.34   15.05
   2  11   5  307.60   27.28
   2  11   5  321.79   30.24
   2  11   6  298.62   27.19
   2  11   6  263.34   26.96
   2  11   7   21.89   10.08
   2  11   7   11.58    8.66
   2  11   8  117.18   18.26
   2  11   8   62.73   15.49
   2  11   9  442.90   34.61
   2  11   9  433.99   34.65
   2  11  10  265.21   27.69
   2  11  10  310.65   29.72
   2  11  11   64.95   15.49
   2  11  11   77.70   16.29
   2  11  12  261.25   28.03
   2  11  12  251.54   27.67
   2  11  13   19.88   10.22
   2  11  13   22.21   11.18
   2  11  14    0.50   10.33
   2  11  15   32.76   14.12
   2  12  -9  -12.58   13.55
   2  12  -8   11.64   12.05
   2  12  -8   -2.51   12.79
   2  12  -7   10.50   12.82
   2  12  -7   10.57   15.02
   2  12  -6   12.57   10.56
   2  12  -6  -12.10   13.26
   2  12  -5  375.41   38.03
   2  12  -5  458.60   38.06
   2  12  -4  104.41   18.43
   2  12  -4  121.55   22.23
   2  12  -3   48.99   14.07
   2  12  -3   81.01   18.79
   2  12  -3   38.48   15.43
   2  12  -2  733.45   50.09
   2  12  -2  707.96   43.43
   2  12  -2  783.77   45.06
   2  12  -1   36.48   13.30
   2  12  -1   48.93   15.44
   2  12   0  404.04   32.29
   2  12   0  380.42   35.27
   2  12   1  103.78   17.06
   2  12   1  135.16   21.88
   2  12   2   26.69   11.36
   2  12   2   33.25   12.92
   2  12   3   -5.88   10.60
   2  12   3   -0.68    6.93
   2  12   4   15.17   10.23
   2  12   4   11.60    8.95
   2  12   5    3.13    7.70
   2  12   5   -9.36    8.93
   2  12   6   16.56    9.88
   2  12   6   27.29   12.19
   2  12   7  135.00   20.46
   2  12   7  107.11   19.79
   2  12   8  238.03   26.72
   2  12   8  264.50   30.95
   2  12   9   26.31   12.01
   2  12   9   17.92   11.16
   2  12  10  170.28   24.02
   2  12  10  174.00   24.39
   2  12  11   19.97   13.14
   2  12  11   19.88   12.42
   2  12  12  346.27   34.00
   2  12  12  285.79   31.21
   2  12  13    9.66   11.18
   2  13  -6   69.61   21.06
   2  13  -6   53.18   16.46
   2  13  -5    2.79   11.79
   2  13  -5   -5.85   13.53
   2  13  -4  221.50   31.30
   2  13  -4  248.43   28.34
   2  13  -3    5.89   11.82
   2  13  -3    7.79   10.21
   2  13  -2   70.16   17.08
   2  13  -2   59.80   17.89
   2  13  -2   99.44   20.51
   2  13  -1  260.24   28.55
   2  13  -1  347.61   36.75
   2  13  -1  278.93   28.01
   2  13   0   16.15   10.62
   2  13   0   21.56   14.07
   2  13   1  100.65   19.14
   2  13   1   73.92   18.98
   2  13   2   22.11   12.36
   2  13   2    4.03   10.04
   2  13   3  -10.74    9.52
   2  13   3   15.70   11.34
   2  13   4   18.98    9.86
   2  13   4    9.41    8.77
   2  13   5  135.95   20.92
   2  13   5  135.37   23.93
   2  13   6   -6.20   12.09
   2  13   6   26.96   14.22
   2  13   7   54.60   16.04
   2  13   7   48.08   15.95
   2  13   8   76.75   18.28
   2  13   8   63.55   18.49
   2  13   9  389.01   36.39
   2  13   9  329.75   36.08
   2  13  10   46.34   19.20
   2  13  11  144.63   26.24
   2  13  12   43.52   15.29
   2  14  -3   37.55   15.83
   2  14  -2  146.39   23.94
   2  14   0  214.20   29.44
   2  14   1   14.26   11.46
   2  14   2  169.71   25.54
   2  14   3  356.07   34.85
   2  14   4   11.72   12.29
   2  14   5   22.94   11.70
  -3  13   3   11.33    8.01
  -3  13   2    6.38    7.93
  -3  13   1   -6.09    8.97
  -3  13   0    4.49    8.46
  -3  13  -1   30.78   11.93
  -3  13  -2   40.62   12.27
  -3  13  -3   16.46    9.75
  -3  13  -4   23.35   12.62
  -3  12   9    3.55    9.82
  -3  12   8   26.05   12.27
  -3  12   7   -0.39    8.91
  -3  12   7   -5.17    8.14
  -3  12   6  342.33   31.88
  -3  12   6  403.48   33.43
  -3  12   5  319.74   29.65
  -3  12   5  315.64   30.94
  -3  12   4  176.85   22.33
  -3  12   4  199.24   24.87
  -3  12   3  126.53   18.46
  -3  12   3   94.81   17.74
  -3  12   2   -4.02    6.58
  -3  12   2   16.42   10.95
  -3  12   1   39.87   11.42
  -3  12   1   45.93   13.32
  -3  12   0  134.22   20.33
  -3  12   0   95.40   16.40
  -3  12  -1   35.57   11.63
  -3  12  -1   40.22   12.08
  -3  12  -2    6.08    7.92
  -3  12  -2   17.00   10.48
  -3  12  -3  155.99   19.57
  -3  12  -3  168.58   40.80
  -3  12  -4   41.87   10.74
  -3  12  -4   68.22   15.36
  -3  12  -5  125.31   18.93
  -3  12  -5  146.33   21.90
  -3  12  -6  175.64   25.21
  -3  12  -7  331.70   34.07
  -3  11  11  550.30   40.14
  -3  11  10  145.70   21.19
  -3  11  10  108.00   19.02
  -3  11   9  130.17   19.98
  -3  11   9   90.69   16.19
  -3  11   8   -1.12    7.94
  -3  11   8   13.81    9.94
  -3  11   7  374.41   31.66
  -3  11   7  355.27   30.58
  -3  11   6   19.34    9.95
  -3  11   6    0.17    7.81
  -3  11   5  450.89   34.18
  -3  11   5  436.60   31.54
  -3  11   4  141.11   20.00
  -3  11   4  154.25   19.48
  -3  11   3    1.17    6.88
  -3  11   3   13.95    8.34
  -3  11   2  494.83   31.85
  -3  11   2  509.69   35.89
  -3  11   1    1.38    6.78
  -3  11   1   16.91    8.45
  -3  11   0   77.99   14.27
  -3  11   0   66.60   12.17
  -3  11  -1  442.27   28.71
  -3  11  -1  451.32   33.54
  -3  11  -2  195.45   22.66
  -3  11  -2  137.51   16.37
  -3  11  -3  150.23   17.23
  -3  11  -3  143.16   19.68
  -3  11  -4  252.43   25.59
  -3  11  -4  267.21   23.06
  -3  11  -5   22.69    8.78
  -3  11  -5   40.66   12.24
  -3  11  -6   77.27   13.50
  -3  11  -6   93.82   17.03
  -3  11  -7  267.81   28.43
  -3  11  -8  336.30   33.07
  -3  11  -9   -8.97   10.97
  -3  11 -10  141.06   24.04
  -3  11 -11  302.69   34.78
  -3  11 -12  -11.18   14.33
  -3  10  13    9.45   10.15
  -3  10  12  193.38   23.43
  -3  10  11    3.81    8.43
  -3  10  10  237.09   24.47
  -3  10  10  224.30   23.06
  -3  10   9  112.14   16.78
  -3  10   9   78.95   15.58
  -3  10   8  304.61   26.27
  -3  10   8  322.61   26.91
  -3  10   7    3.24    7.04
  -3  10   7   19.40    8.74
  -3  10   6  223.90   22.38
  -3  10   6  266.01   24.90
  -3  10   5   28.27    9.22
  -3  10   5   44.12   11.60
  -3  10   4   32.09   10.17
  -3  10   4   50.53   11.21
  -3  10   3  230.39   21.32
  -3  10   3  271.29   24.73
  -3  10   2    1.58    5.37
  -3  10   2    2.57    7.92
  -3  10   1   75.53   12.49
  -3  10   1   80.21   13.84
  -3  10   0  882.88   38.72
  -3  10   0  892.93   43.58
  -3  10  -1    2.80    6.41
  -3  10  -1    9.46    5.73
  -3  10  -2  254.74   23.32
  -3  10  -2  247.70   20.29
  -3  10  -3  234.37   19.33
  -3  10  -3  263.64   24.15
  -3  10  -4   25.61    8.32
  -3  10  -4   48.90    9.89
  -3  10  -5   -3.42    5.65
  -3  10  -5    8.64    6.47
  -3  10  -6   21.96    7.50
  -3  10  -6   11.30    7.78
  -3  10  -7  189.66   18.67
  -3  10  -7  147.60   19.77
  -3  10  -8   57.15   13.48
  -3  10  -9   92.72   18.71
  -3  10 -10  126.50   21.03
  -3  10 -11  114.93   20.88
  -3  10 -12   77.22   19.17
  -3  10 -13   13.33   13.86
  -3   9  16    4.68   10.76
  -3   9  15   16.19   12.93
  -3   9  14   11.69   11.74
  -3   9  13   78.68   15.28
  -3   9  12  239.61   24.31
  -3   9  11  235.94   22.72
  -3   9  11  370.12   28.97
  -3   9  10    2.96    6.04
  -3   9  10    6.67    6.56
  -3   9   9  899.30   43.10
  -3   9   9  911.69   41.49
  -3   9   8  215.74   21.46
  -3   9   8  126.98   16.79
  -3   9   7  279.95   23.68
  -3   9   7  298.55   24.10
  -3   9   6   26.57    8.28
  -3   9   6   15.34    6.55
  -3   9   5   94.35   13.81
  -3   9   5   60.87   11.15
  -3   9   4    8.31    5.68
  -3   9   4   -6.50    6.23
  -3   9   3   -1.15    4.95
  -3   9   3    0.71    5.37
  -3   9   2  106.13   13.26
  -3   9   2  123.30   15.43
  -3   9   1   14.93    7.15
  -3   9   1   14.13    7.28
  -3   9   0    1.11    5.36
  -3   9   0    1.40    4.51
  -3   9  -1  266.00   19.52
  -3   9  -1  325.05   24.38
  -3   9  -2   85.78   12.63
  -3   9  -2   54.48    9.27
  -3   9  -3  925.43   41.01
  -3   9  -3  950.76   35.45
  -3   9  -4  668.44   35.18
  -3   9  -4  735.04   31.08
  -3   9  -5  284.86   19.30
  -3   9  -5  266.98   23.00
  -3   9  -6  717.61   37.60
  -3   9  -6  702.81   30.41
  -3   9  -7   10.15    6.94
  -3   9  -7    2.74    5.96
  -3   9  -8   60.97   10.65
  -3   9  -8   49.73   10.96
  -3   9  -9   69.86   13.92
  -3   9 -10   16.79    8.30
  -3   9 -11   21.23   11.02
  -3   9 -12   27.90   12.01
  -3   9 -13   54.83   16.96
  -3   9 -14  272.86   32.13
  -3   9 -14  269.48   31.21
  -3   8  17   29.71   13.33
  -3   8  16   -3.40    8.95
  -3   8  15   28.82   12.58
  -3   8  14  114.59   18.17
  -3   8  13   87.79   14.89
  -3   8  12    9.47    6.85
  -3   8  11  195.93   20.02
  -3   8  11  158.36   17.23
  -3   8  10  733.33   37.37
  -3   8  10  822.74   36.62
  -3   8   9  109.35   14.59
  -3   8   9  122.01   14.29
  -3   8   8  850.08   38.27
  -3   8   8  842.14   36.21
  -3   8   7  658.51   32.11
  -3   8   7  651.40   33.06
  -3   8   6   97.12   12.61
  -3   8   6  124.16   14.95
  -3   8   5  180.88   16.69
  -3   8   5  185.81   17.30
  -3   8   4  285.97   20.48
  -3   8   4  307.47   21.66
  -3   8   3  177.46   16.98
  -3   8   3  170.39   15.97
  -3   8   2   24.63    7.49
  -3   8   2   19.20    5.78
  -3   8   1  728.52   33.51
  -3   8   1  797.68   32.56
  -3   8   0  854.07   36.55
  -3   8   0  930.23   34.33
  -3   8  -1   66.48   10.50
  -3   8  -1   62.42    9.55
  -3   8  -2 2217.95   58.49
  -3   8  -2 2259.93   52.58
  -3   8  -3  375.73   20.90
  -3   8  -3  369.69   24.36
  -3   8  -4  335.42   23.53
  -3   8  -4  420.59   21.93
  -3   8  -5 2446.58   63.25
  -3   8  -5 2628.78   54.38
  -3   8  -6   21.16    7.17
  -3   8  -6   13.88    5.17
  -3   8  -7  498.08   23.60
  -3   8  -7  458.31   28.83
  -3   8  -8   32.77    7.94
  -3   8  -8   17.72    7.17
  -3   8  -9   20.11    7.32
  -3   8  -9   16.47    6.93
  -3   8 -10   27.69    9.71
  -3   8 -11   93.55   16.54
  -3   8 -12   21.77    9.83
  -3   8 -13  155.94   22.00
  -3   8 -14  188.39   25.69
  -3   8 -14  162.03   23.07
  -3   8 -15  125.68   21.91
  -3   8 -16  289.25   33.02
  -3   7  17    0.97    8.88
  -3   7  16  142.24   20.88
  -3   7  15   74.43   15.36
   3  -7 -15   64.57   14.05
   3  -7 -14    2.63    7.61
  -3   7  14   -8.18    9.01
  -3   7  13  166.90   19.00
   3  -7 -13  197.07   20.69
  -3   7  12   57.08   11.80
   3  -7 -12   62.61   12.01
  -3   7  11   87.72   13.33
  -3   7  11   52.33    9.73
  -3   7  10  403.68   23.99
  -3   7  10  451.40   27.89
  -3   7   9  365.90   22.23
  -3   7   9  384.42   24.78
  -3   7   8    8.39    5.09
  -3   7   8   16.69    5.64
  -3   7   7    5.47    5.07
  -3   7   7    3.82    4.73
  -3   7   6  658.31   30.04
  -3   7   6  642.76   28.41
  -3   7   5   22.41    6.44
  -3   7   5   22.05    7.00
  -3   7   4   77.29   10.50
  -3   7   4   61.29   10.01
  -3   7   3   15.62    5.33
  -3   7   3   23.49    6.26
  -3   7   2  571.97   26.54
  -3   7   2  478.49   24.98
  -3   7   1  748.87   31.22
  -3   7   1  782.51   30.21
  -3   7   0    1.05    3.88
  -3   7   0    0.08    4.43
  -3   7  -1  324.73   20.70
  -3   7  -1  302.97   18.45
  -3   7  -2  165.00   15.29
  -3   7  -2  192.80   14.29
  -3   7  -3 1098.08   38.75
  -3   7  -3 1081.31   33.07
  -3   7  -4    5.60    5.15
  -3   7  -4    9.89    3.94
  -3   7  -5  214.34   17.62
  -3   7  -5  205.68   14.09
  -3   7  -6 1749.83   50.30
  -3   7  -6 1762.62   40.31
  -3   7  -7   38.77    7.19
  -3   7  -7   34.16    8.05
  -3   7  -8   69.50   11.54
  -3   7  -8   73.78    8.97
  -3   7  -9  119.75   14.88
  -3   7  -9  114.85   11.09
  -3   7 -10   51.36   11.12
  -3   7 -10   36.90    7.05
  -3   7 -11   -5.55    6.18
  -3   7 -12  262.08   24.08
  -3   7 -13   48.78   11.83
  -3   7 -14   76.04   16.44
  -3   7 -14  102.33   17.98
  -3   7 -15   74.12   16.89
  -3   7 -16  338.56   34.25
  -3   7 -17   50.05   18.01
   3  -6 -17   94.09   18.76
  -3   6  16  360.53   29.10
   3  -6 -16  428.55   33.37
  -3   6  15   21.92   10.12
   3  -6 -15   23.51   11.47
   3  -6 -14   80.37   16.14
  -3   6  14   75.32   13.70
  -3   6  13   42.64   10.11
   3  -6 -13   58.78   12.32
  -3   6  12  296.07   22.47
   3  -6 -12  303.31   24.34
  -3   6  11   89.30   11.18
  -3   6  11  107.90   13.77
   3  -6 -11  130.43   15.65
  -3   6  10   99.41   12.48
  -3   6  10  106.11   11.65
   3  -6 -10   89.98   10.07
   3  -6 -10   80.85   12.65
  -3   6   9  155.81   13.23
  -3   6   9  151.98   14.91
   3  -6  -9  190.52   17.42
   3  -6  -9  160.52   13.13
   3  -6  -8  393.95   24.22
  -3   6   8  357.16   19.62
  -3   6   8  382.09   22.40
   3  -6  -8  413.05   20.82
  -3   6   7  205.07   16.22
  -3   6   7  239.55   16.04
   3  -6  -7  237.87   16.43
  -3   6   6  248.41   16.42
  -3   6   6  215.80   16.11
   3  -6  -6  263.40   17.78
  -3   6   5  451.43   22.23
  -3   6   5  478.37   23.73
  -3   6   4  279.42   17.69
  -3   6   4  284.92   17.89
  -3   6   3    3.00    3.90
  -3   6   3    5.70    3.43
  -3   6   2 1304.38   37.86
  -3   6   2 1257.28   35.96
  -3   6   1  123.05   12.04
  -3   6   1  134.22   11.64
  -3   6   0   54.17    8.22
  -3   6   0   42.86    7.03
  -3   6  -1  951.73   32.60
  -3   6  -1  902.08   28.51
  -3   6  -2    9.39    4.17
  -3   6  -2    5.82    4.35
  -3   6  -3  481.21   23.74
  -3   6  -4  324.70   19.62
  -3   6  -5  390.21   21.71
  -3   6  -6   12.42    5.05
  -3   6  -7  283.24   19.66
  -3   6  -8  809.19   33.58
  -3   6  -8  737.88   23.32
  -3   6  -9  124.01   13.93
  -3   6  -9  118.63    9.62
  -3   6 -10  951.08   38.57
  -3   6 -10  842.44   24.86
  -3   6 -11  145.40   16.60
  -3   6 -11   96.35    8.93
  -3   6 -12   36.03    9.27
  -3   6 -13  405.29   28.07
  -3   6 -14   23.40   11.64
  -3   6 -14   -2.48    6.84
  -3   6 -15   73.47   17.16
  -3   6 -15   69.53   14.16
  -3   6 -16    9.01    9.58
  -3   6 -17  368.61   36.11
  -3   6 -18   61.64   18.69
   3  -5 -18  110.56   21.26
   3  -5 -17  198.29   24.05
  -3   5  16   92.43   14.99
   3  -5 -16   87.25   16.30
  -3   5  15  374.17   27.25
   3  -5 -15  395.91   31.13
   3  -5 -14  419.31   30.77
  -3   5  14  499.21   29.67
  -3   5  13  685.80   33.67
   3  -5 -13  649.52   36.50
  -3   5  12   24.04    7.44
   3  -5 -12   59.32   12.42
   3  -5 -11  325.03   24.42
  -3   5  11  295.37   20.27
  -3   5  11  312.11   17.15
   3  -5 -11  332.57   19.33
  -3   5  10    1.08    4.08
   3  -5 -10   15.88    7.25
   3  -5 -10    6.68    4.68
  -3   5  10    4.79    3.28
  -3   5   9   -3.99    4.76
   3  -5  -9   -0.54    6.91
  -3   5   9    9.26    4.55
   3  -5  -9   12.51    5.53
  -3   5   8   15.05    5.78
  -3   5   8   19.49    5.18
   3  -5  -8   15.88    5.50
   3  -5  -8    4.04    4.64
   3  -5  -7  362.20   22.32
  -3   5   7  340.38   19.35
   3  -5  -7  290.07   17.47
  -3   5   7  338.02   17.23
  -3   5   6   42.27    6.56
   3  -5  -6   37.89    7.43
  -3   5   6   52.97    8.20
   3  -5  -6   47.71    7.52
  -3   5   5  236.65   14.63
  -3   5   5  228.96   15.36
   3  -5  -5  237.08   16.10
  -3   5   4  346.34   17.63
  -3   5   4  320.16   17.55
   3  -5  -4  318.70   18.11
  -3   5   3  479.42   20.95
   3  -5  -3  421.68   21.57
  -3   5   3  433.70   19.93
  -3   5   2   69.24    8.43
  -3   5   2   67.61    8.04
   3  -5  -2   75.19    9.95
  -3   5   1 1070.05   30.81
  -3   5   0   15.52    4.22
  -3   5  -1  515.93   22.18
  -3   5  -2  668.87   25.28
  -3   5  -3  164.60   12.67
  -3   5  -4    4.75    3.13
  -3   5  -5  330.01   18.35
  -3   5  -6  109.34   11.11
  -3   5  -7    4.59    4.51
  -3   5  -8  154.65   13.73
  -3   5  -9 1101.04   37.16
  -3   5 -10  431.32   24.30
  -3   5 -11  500.46   26.91
  -3   5 -12  716.45   33.14
  -3   5 -13    8.74    6.56
  -3   5 -14  799.81   44.85
  -3   5 -14  863.48   38.49
  -3   5 -15   39.73   12.93
  -3   5 -15   44.24   10.29
  -3   5 -16  140.31   21.01
  -3   5 -17   -2.21    9.58
  -3   5 -18   25.97   13.16
  -3   5 -20   96.28   23.93
   3  -4 -19    3.05   10.68
   3  -4 -18   14.49   11.71
   3  -4 -17   74.49   15.16
   3  -4 -16    0.42    7.34
   3  -4 -15  381.64   30.40
  -3   4  15  406.61   26.52
  -3   4  14   40.92    8.82
   3  -4 -14   35.32   10.46
  -3   4  13   25.75    7.63
   3  -4 -13   -4.64    7.83
   3  -4 -12  727.08   37.70
   3  -4 -12  838.29   30.53
  -3   4  12  764.44   31.52
   3  -4 -11  104.79   15.09
   3  -4 -11  118.50   12.28
  -3   4  11  121.95   12.67
  -3   4  10  528.79   24.57
  -3   4  10  464.34   17.76
   3  -4 -10  581.22   25.03
   3  -4 -10  516.11   29.25
  -3   4   9  338.14   15.22
  -3   4   9  374.98   19.76
   3  -4  -9  362.28   19.70
   3  -4  -9  362.67   23.46
  -3   4   8    0.91    3.38
  -3   4   8   11.22    3.86
   3  -4  -8    9.72    7.38
  -3   4   8    6.40    4.56
   3  -4  -8   16.15    5.77
   3  -4  -7   16.27    8.16
  -3   4   7    2.93    3.47
  -3   4   7    1.40    2.68
  -3   4   7    2.14    4.54
   3  -4  -7    7.56    5.32
  -3   4   6    7.94    4.53
  -3   4   6    6.47    3.98
  -3   4   6    0.72    2.88
   3  -4  -6    1.08    4.01
   3  -4  -6    0.87    5.82
   3  -4  -5   10.49    6.16
  -3   4   5   12.92    5.21
  -3   4   5    6.56    3.35
  -3   4   5    6.27    3.46
   3  -4  -5    5.08    4.54
  -3   4   4 1693.06   35.08
   3  -4  -4 1751.77   41.06
   3  -4  -4 1761.47   42.39
  -3   4   4 1648.09   36.47
   3  -4  -3  161.29   12.99
  -3   4   3  168.01   10.88
  -3   4   2 4467.17   55.36
   3  -4  -2 4540.07   67.02
  -3   4   1  575.21   20.14
   3  -4  -1  427.95   20.94
  -3   4   0 3784.78   51.39
   3  -4   0 3881.38   61.74
  -3   4  -1 2998.19   46.11
   3  -4   1 3098.42   57.69
  -3   4  -2  459.22   18.50
  -3   4  -3  263.47   14.06
  -3   4  -4  120.21    9.70
  -3   4  -5  199.42   12.66
  -3   4  -6    2.10    2.56
  -3   4  -7    3.74    3.43
  -3   4  -8   63.46    8.13
  -3   4  -9    8.94    4.63
  -3   4 -10  663.45   27.35
  -3   4 -10  866.33   46.61
  -3   4 -11  290.11   19.29
  -3   4 -12  167.65   15.16
  -3   4 -13 1069.23   38.42
  -3   4 -14   -5.97    5.43
  -3   4 -14   -1.37    6.48
  -3   4 -15 1153.14   41.23
  -3   4 -15 1095.20   51.53
  -3   4 -16   43.69   12.43
  -3   4 -17   -1.14    9.13
  -3   4 -18   31.32   13.33
  -3   4 -19   18.78   13.02
  -3   4 -20   -5.12   10.42
   3  -3 -20    1.77   11.11
   3  -3 -19  169.08   25.55
   3  -3 -18   32.88   13.65
   3  -3 -17  119.54   20.15
   3  -3 -16   80.86   17.02
  -3   3  15    1.21    5.46
   3  -3 -15    5.52    8.35
   3  -3 -14   -9.24    8.28
  -3   3  14    0.30    4.73
   3  -3 -13  617.24   36.27
   3  -3 -13  676.00   30.20
  -3   3  12  189.92   15.04
   3  -3 -12  181.39   19.49
   3  -3 -12  195.01   16.28
  -3   3  11  302.96   17.94
   3  -3 -11  357.38   25.53
   3  -3 -11  324.90   19.94
   3  -3 -10  286.43   22.11
  -3   3  10  290.91   17.01
   3  -3 -10  253.95   17.46
   3  -3  -9  652.88   31.66
  -3   3   9  684.26   25.00
   3  -3  -9  696.01   27.16
  -3   3   9  649.36   17.69
  -3   3   8  106.82    7.65
   3  -3  -8  107.35   13.64
   3  -3  -8  101.08   10.53
  -3   3   8  109.87   10.02
  -3   3   8  114.99    9.93
  -3   3   7  634.66   18.55
  -3   3   7  621.13   22.26
  -3   3   7  647.23   22.91
   3  -3  -7  693.36   30.58
   3  -3  -7  603.83   24.35
  -3   3   6   12.90    3.16
  -3   3   6   13.96    4.32
   3  -3  -6    6.61    4.55
  -3   3   6   13.55    4.58
   3  -3  -6    8.97    4.61
  -3   3   5  898.23   21.77
  -3   3   5  887.29   26.81
   3  -3  -5  893.70   28.74
   3  -3  -5  929.80   32.41
   3  -3  -4   32.57    6.65
  -3   3   4   49.30    5.54
  -3   3   4   44.19    7.25
   3  -3  -4   45.51    6.67
   3  -3  -3  391.37   19.36
  -3   3   3  358.86   18.77
   3  -3  -3  361.65   18.53
  -3   3   3  355.97   14.02
   3  -3  -2  259.05   14.98
  -3   3   2  288.71   12.72
  -3   3   2  297.03   17.16
   3  -3  -2  268.71   16.74
  -3   3   1   53.15    8.04
   3  -3  -1   43.61    7.03
  -3   3   1   51.61    5.51
   3  -3   0  313.69   17.01
  -3   3   0  305.63   12.95
  -3   3  -1  554.03   17.90
   3  -3   1  505.18   21.46
  -3   3  -2  968.62   23.44
   3  -3   2 1063.25   30.99
  -3   3  -3  439.32   16.08
   3  -3   3  412.55   20.61
  -3   3  -4    2.79    1.87
  -3   3  -5  975.40   25.03
  -3   3  -6  246.79   13.13
  -3   3  -7  443.22   18.02
  -3   3  -8   19.57    4.24
  -3   3  -9    8.98    3.77
  -3   3  -9   15.66   10.74
  -3   3 -10  448.73   29.40
  -3   3 -10  359.10   18.12
  -3   3 -11   62.60    8.28
  -3   3 -11   70.61   14.77
  -3   3 -12  854.26   30.87
  -3   3 -13  167.93   18.16
  -3   3 -13  194.99   15.48
  -3   3 -14  740.52   38.75
  -3   3 -14  736.94   29.98
  -3   3 -15   69.56   13.84
  -3   3 -15   67.69    9.93
  -3   3 -16   35.24   11.61
  -3   3 -17   29.24   11.14
  -3   3 -18  131.53   19.90
  -3   3 -19    0.50    8.69
  -3   3 -20  144.48   23.12
  -3   3 -21   12.23   10.62
   3  -2 -19  108.10   20.75
   3  -2 -18  155.78   23.07
   3  -2 -17   18.98   11.18
   3  -2 -16  252.98   26.11
   3  -2 -15   71.16   14.81
  -3   2  14  154.13   13.69
   3  -2 -14  149.26   18.84
   3  -2 -14  172.99   17.06
   3  -2 -13  143.78   17.62
  -3   2  13  147.37   12.85
   3  -2 -13  148.45   15.40
  -3   2  12    7.99    5.53
   3  -2 -12    1.52    6.29
   3  -2 -12    9.64    7.73
   3  -2 -11  234.56   17.77
  -3   2  11  231.08   14.50
   3  -2 -11  207.53   19.56
   3  -2 -10   89.37   13.34
  -3   2  10   89.61    9.06
   3  -2 -10  102.67   11.64
   3  -2  -9   13.53    6.57
   3  -2  -9   20.74    6.71
  -3   2   9   13.47    4.24
  -3   2   9   16.08    2.60
  -3   2   8  212.32    8.80
   3  -2  -8  191.63   16.64
   3  -2  -8  206.88   14.99
  -3   2   8  196.46   12.04
   3  -2  -7 1216.23   34.61
   3  -2  -7 1180.04   39.14
  -3   2   7 1208.44   20.96
  -3   2   7 1219.10   29.95
  -3   2   7 1168.69   27.57
  -3   2   6 3267.62   35.55
   3  -2  -6 3267.89   62.27
  -3   2   6 3362.88   50.04
   3  -2  -6 3327.08   55.58
  -3   2   5   14.99    2.75
   3  -2  -5    8.39    5.00
  -3   2   5    9.18    3.53
   3  -2  -5   18.77    5.79
  -3   2   4 1342.00   23.39
  -3   2   4 1341.09   31.06
   3  -2  -4 1369.35   37.60
   3  -2  -4 1363.27   33.70
  -3   2   3  307.75   11.24
  -3   2   3  287.46   15.50
   3  -2  -3  295.21   15.69
   3  -2  -3  319.46   17.50
  -3   2   2  255.62   10.19
  -3   2   2  254.81   14.70
   3  -2  -2  292.62   16.00
   3  -2  -2  269.63   14.99
  -3   2   2  248.27   15.00
   3  -2  -1  724.79   22.79
  -3   2   1  692.28   16.70
  -3   2   1  662.23   23.21
   3  -2  -1  706.67   24.99
  -3   2   0  618.51   21.94
   3  -2   0  641.54   23.89
  -3   2   0  627.37   16.15
  -3   2  -1  694.14   24.45
   3  -2   1  725.72   25.05
  -3   2  -2   65.11    8.56
   3  -2   2  115.49    9.99
  -3   2  -3 3258.04   38.23
  -3   2  -3 3268.13   54.78
   3  -2   3 3357.21   52.06
  -3   2  -4  229.97   15.29
   3  -2   4  223.04   13.72
  -3   2  -4  203.78    9.91
  -3   2  -5  843.63   28.97
  -3   2  -5  713.86   18.84
  -3   2  -6  144.74    8.92
  -3   2  -7    9.65    2.92
  -3   2  -8  293.78   13.63
  -3   2  -8  313.53   20.65
  -3   2  -9 2397.21   40.36
  -3   2  -9 2537.05   58.08
  -3   2 -10  431.34   24.73
  -3   2 -10  424.96   18.07
  -3   2 -11  139.59   15.06
  -3   2 -11  153.69   11.45
  -3   2 -12  329.94   17.33
  -3   2 -12  267.35   17.68
  -3   2 -12  313.80   21.76
  -3   2 -13  275.01   21.68
  -3   2 -13  294.78   16.88
  -3   2 -14  429.79   21.20
  -3   2 -14  334.26   23.90
  -3   2 -15  897.39   30.12
  -3   2 -15  732.13   36.35
  -3   2 -16   73.59   12.45
  -3   2 -17  109.02   16.04
  -3   2 -18  251.77   24.13
  -3   2 -19  136.93   19.59
  -3   2 -20   17.42   11.57
  -3   2 -21  222.67   26.88
   3  -1 -20  390.61   37.33
   3  -1 -19   66.76   18.41
   3  -1 -18  434.02   36.21
   3  -1 -17  433.74   34.89
   3  -1 -16  181.04   22.91
   3  -1 -15  156.76   20.47
   3  -1 -14    0.64    5.90
   3  -1 -14    0.02    6.29
   3  -1 -13    0.44    5.20
   3  -1 -13    6.26    5.80
  -3   1  13    3.65    3.98
  -3   1  12    0.81    3.67
   3  -1 -12    3.13    4.95
   3  -1 -12   -2.27    5.00
  -3   1  11  292.64   14.47
   3  -1 -11  289.45   18.59
   3  -1 -11  281.59   22.05
  -3   1  10  184.55   11.23
   3  -1 -10  157.95   13.46
   3  -1 -10  180.47   17.02
  -3   1   9   85.04    3.99
   3  -1  -9   91.56   11.79
   3  -1  -9  131.68   12.25
  -3   1   9  127.23    9.22
  -3   1   8 1029.20   15.46
   3  -1  -8  986.60   30.55
  -3   1   8 1071.89   25.02
   3  -1  -8 1012.07   37.20
  -3   1   7  348.03    9.57
   3  -1  -7  309.13   16.64
  -3   1   7  345.90   13.74
   3  -1  -7  341.74   20.83
   3  -1  -6  587.20   25.73
  -3   1   6  656.96   21.75
  -3   1   6  628.01   13.12
   3  -1  -5 3620.06   61.31
   3  -1  -5 3671.13   54.78
   3  -1  -4  768.37   27.08
  -3   1   4  787.32   23.49
   3  -1  -4  740.32   24.38
  -3   1   3 4292.67   53.83
   3  -1  -3 4251.21   57.50
  -3   1   3 4111.70   59.56
  -3   1   2   -0.18    1.44
   3  -1  -2   -2.02    2.68
  -3   1   2    0.93    3.33
   3  -1  -2    0.53    3.36
   3  -1  -1  108.29    9.37
  -3   1   1  124.09    9.46
   3  -1  -1  108.38    9.07
   3  -1   0   43.77    5.62
  -3   1   0   46.19    6.01
  -3   1   0   39.42    5.68
   3  -1   0   47.21    6.59
  -3   1  -1  109.41    8.64
   3  -1   1   96.77    7.48
  -3   1  -1  101.74    9.65
   3  -1   1  113.58    9.51
  -3   1  -2    9.74    4.08
  -3   1  -2   12.04    5.23
   3  -1   2    6.88    3.44
  -3   1  -3 2339.74   41.89
   3  -1   3 2359.73   42.39
   3  -1   4 5120.44   62.19
  -3   1  -4 5241.39   64.43
  -3   1  -5 2677.51   47.29
   3  -1   5 2665.21   44.95
  -3   1  -6   19.59    8.66
  -3   1  -6   16.63    6.45
  -3   1  -7 9999.00  102.54
  -3   1  -7 9958.89   98.02
  -3   1  -8 2518.25   52.16
  -3   1  -8 2475.61   51.01
  -3   1  -9  931.29   31.89
  -3   1 -10  315.04   13.84
  -3   1 -10  375.68   22.01
  -3   1 -11   10.97    5.02
  -3   1 -11   17.13    7.55
  -3   1 -11    8.07    3.07
  -3   1 -12   18.75    5.06
  -3   1 -12   11.29    5.45
  -3   1 -12   11.57    5.61
  -3   1 -13   20.59    6.37
  -3   1 -13    5.46    6.71
  -3   1 -13   10.63    5.80
  -3   1 -14   54.02    7.80
  -3   1 -14   18.11    5.74
  -3   1 -15    4.84    4.19
  -3   1 -15    6.24    4.82
  -3   1 -16  186.70   18.35
  -3   1 -17   21.56    8.42
  -3   1 -18    2.55    6.01
  -3   1 -19  187.38   21.17
  -3   1 -20  234.41   24.59
  -3   1 -21   -5.02    9.72
   3   0 -20    1.80   10.76
   3   0 -19  112.63   21.41
   3   0 -18  156.10   23.09
   3   0 -17  277.57   27.79
   3   0 -16  312.34   28.68
   3   0 -15   23.07    9.39
   3   0 -15   11.41    7.34
   3   0 -14   15.09    8.13
   3   0 -14   33.16    8.09
   3   0 -13   14.32    7.36
   3   0 -13    4.83    5.64
  -3   0  12    2.28    2.68
   3   0 -12   -3.47    4.38
   3   0 -12   -3.11    5.16
  -3   0  11    3.95    2.47
   3   0 -11    1.10    3.87
  -3   0  10   18.93    3.87
   3   0 -10   14.43    6.60
   3   0 -10   11.46    5.33
  -3   0   9   76.09    3.05
   3   0  -9   84.51    9.19
   3   0  -9   70.17   10.58
   3   0  -8    1.24    3.25
   3   0  -8   -3.51    3.51
  -3   0   8    2.27    2.24
  -3   0   8    0.10    1.89
   3   0  -7  213.06   13.25
   3   0  -7  214.54   15.80
   3   0  -6 1364.39   32.47
   3   0  -6 1385.28   38.21
   3   0  -5  660.49   22.00
   3   0  -5  636.56   25.00
   3   0  -4 3095.67   47.17
   3   0  -4 3105.72   51.95
   3   0  -3 4338.41   54.60
  -3   0   3 4548.51   60.51
   3   0  -2 3074.68   45.48
   3   0  -2 3084.99   48.33
  -3   0   2 3105.28   48.66
  -3   0   1    6.27    2.91
   3   0  -1   12.67    3.73
   3   0  -1   11.64    3.99
  -3   0   1   15.12    3.55
  -3   0   0 1224.99   26.62
  -3   0   0 1213.20   27.79
   3   0   0 1308.60   29.32
   3   0   0 1199.05   26.28
   3   0   1    8.32    2.84
  -3   0  -1    1.43    3.31
   3   0   1    7.36    3.33
  -3   0  -1    9.82    3.19
  -3   0  -2  421.33   17.09
   3   0   2  470.71   17.84
   3   0   2  454.91   13.54
  -3   0  -2  446.65   14.28
  -3   0  -3  766.38   26.67
  -3   0  -3  760.23   22.43
   3   0   3  750.97   21.92
  -3   0  -3  793.73   18.53
  -3   0  -4 2671.78   41.66
  -3   0  -4 2798.07   51.62
   3   0   4 2654.57   41.97
  -3   0  -5 1521.83   32.29
   3   0   5 1506.63   31.43
  -3   0  -5 1552.48   38.89
  -3   0  -6 2635.11   43.75
   3   0   6 2631.26   42.29
  -3   0  -6 2635.45   50.71
  -3   0  -7   87.27   10.14
  -3   0  -7  107.11   10.04
  -3   0  -8 2378.02   49.97
  -3   0  -8 2373.64   45.45
  -3   0  -9 1118.24   32.39
  -3   0  -9 1107.83   34.12
  -3   0 -10   -2.90    3.78
  -3   0 -10   -4.30    6.12
  -3   0 -11 3050.20   53.27
  -3   0 -11 3205.73   54.26
  -3   0 -11 3095.86   57.85
  -3   0 -12   99.47   11.30
  -3   0 -12  122.14   11.68
  -3   0 -13   38.24    5.68
  -3   0 -13   35.67    7.29
  -3   0 -14  196.08   16.17
  -3   0 -14  329.23   15.39
  -3   0 -15   14.15    4.78
  -3   0 -15   10.09    5.24
  -3   0 -16   63.08   10.16
  -3   0 -17  104.78   14.06
  -3   0 -18  266.74   22.72
  -3   0 -19   77.50   13.68
  -3   0 -20    3.18    8.32
   3   1 -19   27.18   13.18
   3   1 -18   98.21   19.01
   3   1 -17  292.37   29.30
   3   1 -16   71.46   12.34
   3   1 -16   32.20   10.70
   3   1 -15  459.98   26.24
   3   1 -15  418.09   31.49
   3   1 -14   25.70    7.83
   3   1 -14    7.20    6.49
   3   1 -13    3.31    5.67
   3   1 -13    3.43    4.05
   3   1 -12  215.88   15.88
   3   1 -12  247.05   20.98
   3   1 -11   24.13    7.80
  -3  -1  11   13.88    2.98
   3   1 -11   19.98    5.87
  -3  -1  10  386.28   11.89
   3   1 -10  350.28   18.81
   3   1  -9  297.09   16.63
   3   1  -9  294.74   19.77
   3   1  -8  326.78   16.91
   3   1  -8  313.96   19.35
  -3  -1   8  373.52   11.24
   3   1  -7  402.37   17.95
   3   1  -7  441.50   21.65
   3   1  -6  698.17   22.73
   3   1  -6  687.50   25.51
   3   1  -5  442.28   17.47
   3   1  -5  474.70   20.38
   3   1  -4  766.56   22.19
   3   1  -4  736.83   24.41
  -3  -1   3 6995.14   74.67
   3   1  -3 6243.46   68.00
   3   1  -2 1186.24   27.01
  -3  -1   2 1313.04   30.56
   3   1  -2 1154.35   28.12
  -3  -1   2 1394.76   28.93
  -3  -1   1 1069.03   25.60
  -3  -1   1 1009.93   25.25
   3   1  -1  907.43   23.46
   3   1  -1  926.78   23.36
   3   1   0    3.46    2.77
  -3  -1   0   10.99    4.04
  -3  -1   0    4.84    3.35
   3   1   0    6.68    2.79
   3   1   1  766.17   18.93
  -3  -1  -1  760.86   26.99
  -3  -1  -1  790.88   21.23
   3   1   1  759.56   21.34
  -3  -1  -1  789.23   19.41
   3   1   2  209.20   11.10
   3   1   2  193.14    8.37
  -3  -1  -2  199.67    8.95
  -3  -1  -2  200.67   10.95
   3   1   3 1513.44   38.40
  -3  -1  -3 1496.34   28.11
   3   1   3 1439.57   29.04
  -3  -1  -3 1444.70   21.72
   3   1   4  192.06   14.08
  -3  -1  -4  179.06    7.31
  -3  -1  -4  176.40    9.91
   3   1   4  174.12   10.17
  -3  -1  -4  188.96   13.92
   3   1   5 1043.09   32.72
  -3  -1  -5 1052.06   31.35
  -3  -1  -5 1056.87   24.14
   3   1   5 1003.30   23.86
   3   1   6  277.61   17.24
  -3  -1  -6  279.21   12.78
   3   1   6  295.12   13.07
  -3  -1  -7   23.61    6.32
   3   1   7   28.92    6.26
  -3  -1  -7   22.56    4.45
   3   1   7   28.40    4.62
  -3  -1  -8 2414.71   38.93
   3   1   8 2364.61   51.03
  -3  -1  -8 2391.56   46.88
  -3  -1  -9  841.34   28.21
  -3  -1  -9  798.80   21.68
  -3  -1  -9  833.69   23.68
   3   1   9  799.35   30.62
  -3  -1 -10 3434.53   48.01
  -3  -1 -10 3515.38   51.16
   3   1  10 3579.53   66.58
  -3  -1 -11  104.55    9.36
   3   1  11   99.38   12.37
  -3  -1 -11  127.58   11.13
  -3  -1 -12 1024.40   29.92
   3   1  12  998.91   37.71
  -3  -1 -12 1083.00   31.40
   3   1  13  140.46   15.34
  -3  -1 -13  132.29   11.83
  -3  -1 -13  126.46   12.51
  -3  -1 -14  100.66   11.05
   3   1  14   90.37   12.92
  -3  -1 -15  104.13    8.44
   3   1  15  120.36   15.43
  -3  -1 -15  115.24   12.84
   3   1  16   30.50    9.45
  -3  -1 -16   31.64    7.61
  -3  -1 -17   -4.99    6.52
  -3  -1 -18   63.89   12.22
  -3  -1 -19   16.47    8.73
   3   2 -19  133.01   23.15
   3   2 -18   14.12   10.36
   3   2 -17   55.83   14.59
   3   2 -16   59.45   13.53
   3   2 -16   40.86    9.66
   3   2 -15   20.67    8.94
   3   2 -15   18.32    6.21
   3   2 -14   12.13    7.12
   3   2 -14    6.49    5.20
   3   2 -13  155.05   18.02
   3   2 -13  174.68   15.53
   3   2 -12   14.59    7.32
   3   2 -12   21.07    5.95
   3   2 -11   56.96   10.36
   3   2 -11   56.28    8.65
  -3  -2  10  931.78   18.04
   3   2 -10  921.12   36.77
   3   2 -10  866.75   29.15
  -3  -2   9  700.74   11.53
   3   2  -9  744.61   26.47
  -3  -2   9  737.43   17.76
   3   2  -9  746.67   31.61
  -3  -2   8  872.15   20.68
   3   2  -8  819.22   31.58
   3   2  -8  831.71   26.65
  -3  -2   7   94.09    7.61
   3   2  -7   81.68    9.56
   3   2  -7   80.69    8.46
   3   2  -6  168.69   12.84
   3   2  -6  193.85   12.09
  -3  -2   5  419.86   18.67
   3   2  -5  731.39   22.59
   3   2  -5  729.88   25.35
  -3  -2   5  505.97   18.96
   3   2  -4 1059.25   26.00
   3   2  -4 1123.41   29.48
  -3  -2   4 1077.03   29.42
  -3  -2   3   86.15    8.48
   3   2  -3   70.65    7.14
   3   2  -3   77.27    7.15
  -3  -2   3   60.06    7.23
   3   2  -2 1395.34   29.39
   3   2  -2 1492.23   29.26
  -3  -2   2 1720.10   38.24
  -3  -2   2 1701.56   34.20
  -3  -2   1  705.53   20.10
  -3  -2   1  667.67   25.78
   3   2  -1  650.08   18.79
   3   2   0   51.48    5.55
   3   2   0   27.71    5.75
   3   2   0   55.67    5.27
  -3  -2   0   50.16    5.35
  -3  -2   0   44.64    6.80
   3   2   1  385.74   18.54
  -3  -2  -1  370.95   14.22
   3   2   1  423.89   14.98
   3   2   1  382.36   12.69
  -3  -2  -1  407.80   12.78
   3   2   2 1027.66   29.77
  -3  -2  -2  997.86   18.04
  -3  -2  -2  987.43   22.66
   3   2   2 1024.75   23.19
   3   2   2 1034.10   18.61
  -3  -2  -2 1083.29   32.57
  -3  -2  -3   17.58    5.65
  -3  -2  -3   16.60    3.42
   3   2   3   15.36    4.25
   3   2   3   15.06    2.07
  -3  -2  -3   22.07    2.64
   3   2   3   17.74    3.58
   3   2   4 3465.64   41.60
   3   2   4 3316.46   55.81
  -3  -2  -5   22.07    1.94
   3   2   5   31.66    6.05
  -3  -2  -5   36.39    4.42
   3   2   5   34.32    4.43
  -3  -2  -5   40.67    6.88
  -3  -2  -6  570.31   22.74
   3   2   6  511.47   15.23
  -3  -2  -6  532.03   14.91
   3   2   6  507.00   22.49
  -3  -2  -7  138.10    5.96
  -3  -2  -7  155.68   12.56
  -3  -2  -7  180.00    8.89
   3   2   7  160.75    9.01
   3   2   7  176.68   13.94
  -3  -2  -8 1274.74   21.02
   3   2   8 1120.23   35.36
  -3  -2  -8 1233.12   23.13
  -3  -2  -8 1457.16   39.43
   3   2   8 1481.76   28.00
   3   2   9  143.88   13.30
  -3  -2  -9  161.06    8.38
  -3  -2  -9  165.63    8.77
  -3  -2  -9  183.88   15.13
  -3  -2 -10 2952.79   40.20
  -3  -2 -10 2985.66   37.61
   3   2  10 2953.49   60.43
  -3  -2 -11 3177.87   46.61
  -3  -2 -11 3140.57   39.54
  -3  -2 -11 3285.54   57.53
   3   2  11 3132.48   64.45
   3   2  12    1.20    4.96
  -3  -2 -12    4.15    3.63
  -3  -2 -12    3.31    3.75
  -3  -2 -12    8.62    8.21
   3   2  13   67.74   11.00
  -3  -2 -13   80.88    9.33
  -3  -2 -13   72.20    7.20
  -3  -2 -13   72.66    9.69
   3   2  14  413.61   26.52
  -3  -2 -14  405.30   21.36
   3   2  15   21.75    8.53
  -3  -2 -15   12.41    5.09
   3   2  16   95.10   15.59
  -3  -2 -16   71.05   11.08
   3   2  17  408.82   29.96
  -3  -2 -17  547.42   29.69
  -3  -2 -18    6.40    6.96
   3   3 -18    2.92    8.73
   3   3 -17    0.16    7.24
   3   3 -17    7.43    7.49
   3   3 -16   36.56    9.08
   3   3 -16   44.27   12.65
   3   3 -15  213.72   18.93
   3   3 -15  239.17   24.57
   3   3 -14   87.15   11.85
   3   3 -14  128.45   17.62
   3   3 -13  125.74   13.97
   3   3 -13  117.15   16.30
   3   3 -12   74.35   12.66
   3   3 -12   73.50   10.43
   3   3 -11   82.83   10.17
   3   3 -11   98.98   13.58
   3   3 -10  677.64   32.44
   3   3 -10  736.29   29.16
  -3  -3  10  755.05   20.12
   3   3  -9  303.41   21.26
  -3  -3   9  315.68   13.75
  -3  -3   8  209.69   11.71
   3   3  -8  187.60   16.68
  -3  -3   7  613.83   20.84
   3   3  -7  605.83   26.86
  -3  -3   6    8.57    2.90
  -3  -3   6    6.54    3.41
   3   3  -6    8.55    3.12
   3   3  -5  285.38   16.60
  -3  -3   5  302.01   12.46
  -3  -3   5  254.52   13.96
  -3  -3   4   37.41    5.36
   3   3  -4   20.09    4.84
  -3  -3   4   21.00    4.93
   3   3  -4   25.56    5.92
  -3  -3   3 1719.88   37.76
   3   3  -3 1614.39   34.23
   3   3  -3 1664.04   38.26
  -3  -3   3 1684.69   33.30
  -3  -3   2    1.35    2.87
   3   3  -2    2.94    2.05
  -3  -3   2    0.76    3.02
   3   3  -2    6.30    3.63
   3   3  -2    2.44    3.36
   3   3  -1   23.03    5.70
   3   3  -1   10.16    3.11
  -3  -3   1   11.21    3.96
   3   3  -1   14.08    2.89
  -3  -3   1   13.58    4.33
   3   3  -1   17.69    4.98
   3   3   0 2328.28   33.51
   3   3   0 2442.35   44.68
   3   3   0 2429.45   35.66
  -3  -3   0 2335.76   34.84
   3   3   0 2436.75   46.20
  -3  -3  -1   81.31    6.40
   3   3   1   65.27    5.83
   3   3   1   63.47    5.15
   3   3   1   71.71    8.48
  -3  -3  -1   74.12    9.72
   3   3   1   84.52    9.09
  -3  -3  -2 1741.56   37.23
   3   3   2 2367.22   34.15
  -3  -3  -2 2754.61   49.58
  -3  -3  -2 2270.59   26.78
   3   3   2 2145.47   25.88
   3   3   2 2443.70   44.75
   3   3   3 2164.82   32.15
   3   3   3 2186.85   43.28
   3   3   3 2159.70   22.27
  -3  -3  -3 2291.12   48.10
  -3  -3  -4  162.80   11.87
   3   3   4  138.54   11.55
   3   3   4  165.75    9.03
  -3  -3  -4  190.79   13.54
  -3  -3  -5 1825.21   40.04
   3   3   5 1861.27   43.53
   3   3   5 1857.57   29.05
   3   3   6 1015.40   20.78
   3   3   6 1013.72   33.02
   3   3   7   19.64    6.29
  -3  -3  -7   15.25    2.20
   3   3   7   29.25    3.76
  -3  -3  -7   22.48    6.25
   3   3   8  148.50   14.05
  -3  -3  -8  139.13   12.80
   3   3   8  126.06    7.20
  -3  -3  -8  140.37    5.82
   3   3   9  132.53   13.15
  -3  -3  -9  142.45   13.06
  -3  -3  -9  127.40    7.31
   3   3  10  436.03   23.82
  -3  -3 -10  437.85   21.82
  -3  -3 -10  427.63   15.00
  -3  -3 -11   12.31    4.75
  -3  -3 -11    8.52    5.65
   3   3  12  231.14   18.54
  -3  -3 -12  249.90   16.97
  -3  -3 -12  267.01   14.85
   3   3  13 1121.37   42.16
  -3  -3 -13 1133.93   33.24
  -3  -3 -13 1244.19   33.90
   3   3  14    6.10    7.15
  -3  -3 -14    2.12    5.39
  -3  -3 -15  713.56   30.30
   3   3  15  691.87   36.39
   3   3  16  305.64   25.26
  -3  -3 -16  309.42   21.62
   3   3  17   85.47   14.86
  -3  -3 -17  129.83   15.33
   3   3  18  409.81   32.11
   3   4 -18   35.68   13.68
   3   4 -17   17.34   11.16
   3   4 -17   11.25    7.99
   3   4 -16   13.59    7.38
   3   4 -16   60.66   15.24
   3   4 -15   91.44   13.32
   3   4 -15  115.04   18.80
   3   4 -14   71.60   11.51
   3   4 -14   70.83   14.26
   3   4 -13   68.02   11.13
   3   4 -13   71.49   13.71
   3   4 -12  336.19   26.44
   3   4 -11  203.92   20.11
   3   4 -10  111.77   14.54
   3   4  -9   59.74   10.12
   3   4  -8 2179.29   54.40
   3   4  -8 2204.44   49.71
  -3  -4   7   17.06    2.34
   3   4  -7   24.37    6.48
   3   4  -7   10.51    5.64
   3   4  -6 2391.14   52.10
   3   4  -6 2498.23   51.99
   3   4  -5   58.11    8.00
  -3  -4   5   63.04    5.74
   3   4  -5   61.10    9.01
  -3  -4   4   15.32    3.47
   3   4  -4    4.19    4.18
   3   4  -4   14.67    4.09
   3   4  -4   11.73    5.56
  -3  -4   3    9.34    3.00
   3   4  -3   -0.02    3.35
   3   4  -3    6.52    2.75
   3   4  -3   13.74    4.45
  -3  -4   2  120.88    9.31
   3   4  -2  107.65    8.91
   3   4  -2  102.27   10.13
   3   4  -2   98.38   10.86
  -3  -4   1  483.44   20.27
   3   4  -1  477.72   17.44
   3   4  -1  550.31   21.72
   3   4  -1  535.46   23.77
  -3  -4   0  106.14   10.47
   3   4   0  125.67    8.35
   3   4   0  105.58   10.51
   3   4   0  129.29   11.93
  -3  -4  -1  690.04   23.14
   3   4   1  619.13   16.84
   3   4   1  780.08   27.92
   3   4   1  708.61   27.44
   3   4   2 2690.51   31.13
   3   4   2 2714.25   38.12
   3   4   2 2808.27   53.02
   3   4   3  182.29    9.42
   3   4   3  177.32    6.85
   3   4   3  223.88   15.92
   3   4   3  216.59   14.72
   3   4   4 1103.13   22.69
   3   4   4 1186.94   36.47
   3   4   4 1095.27   32.73
   3   4   5   11.76    4.53
   3   4   5    6.52    2.28
   3   4   5    6.48    4.49
   3   4   6 2748.03   34.18
   3   4   6 2709.99   54.29
   3   4   7 2821.55   57.10
   3   4   7 3007.30   33.43
   3   4   8 1133.01   37.28
   3   4   8 1014.72   17.61
   3   4   9  183.16   15.81
   3   4  10  203.54   17.34
  -3  -4 -10  179.69    7.45
   3   4  11   51.54   11.09
  -3  -4 -11   31.34    4.36
  -3  -4 -12    7.07    4.44
   3   4  12   13.82    6.89
   3   4  13 1014.98   42.45
  -3  -4 -13  864.78   24.90
  -3  -4 -14   82.88    9.35
   3   4  14   82.11   13.10
   3   4  15    8.30    7.69
  -3  -4 -15   -0.78    5.42
   3   4  16  524.17   33.21
   3   4  17  288.45   26.36
   3   4  18  161.76   21.76
   3   5 -18    9.45    8.93
   3   5 -17    5.17    7.62
   3   5 -17   -0.12    9.03
   3   5 -16    7.14    7.75
   3   5 -16    3.10    7.89
   3   5 -15   23.33    9.06
   3   5 -15   22.84   10.77
   3   5 -14   70.71   12.92
   3   5 -14   68.31   14.44
   3   5 -13    2.65    5.88
   3   5 -12  193.38   21.54
   3   5 -11   24.46    8.36
   3   5 -10  167.30   17.93
   3   5 -10  189.04   17.18
   3   5  -9   26.54    7.15
   3   5  -9   35.67    9.57
   3   5  -8  277.14   20.62
   3   5  -8  302.48   20.44
  -3  -5   7  762.87   14.65
   3   5  -7  732.67   31.67
  -3  -5   6  293.50   10.83
   3   5  -6  286.48   19.46
   3   5  -5  235.60   15.13
   3   5  -5  241.21   17.03
  -3  -5   5  267.02   11.29
   3   5  -5  261.09   18.96
  -3  -5   4  574.61   17.95
   3   5  -4  516.87   23.59
   3   5  -4  542.26   22.63
   3   5  -4  534.62   26.43
  -3  -5   3  212.96   11.47
   3   5  -3  204.06   14.04
   3   5  -3  229.87   16.17
   3   5  -2  500.11   20.80
  -3  -5   2  532.59   19.44
   3   5  -2  535.67   22.49
   3   5  -2  517.42   25.50
   3   5  -1   19.69    5.56
   3   5  -1   17.94    4.06
  -3  -5   1   27.08    5.42
   3   5  -1   23.06    6.07
   3   5   0  194.44   14.34
   3   5   0  152.99   10.20
   3   5   0  169.96   14.77
   3   5   1  228.07   11.84
   3   5   1  230.27   17.30
   3   5   1  199.86   14.85
   3   5   2  356.59   21.30
   3   5   2  368.68   19.57
   3   5   2  335.33   12.85
   3   5   3  664.99   26.81
   3   5   3  696.79   16.49
   3   5   4  182.90    7.39
   3   5   4  181.36    9.87
   3   5   4  185.64   14.76
   3   5   4  183.14   15.48
   3   5   5 4194.58   44.25
   3   5   5 4434.57   73.01
   3   5   5 4329.74   71.37
   3   5   6  677.15   28.98
   3   5   6  747.16   18.42
   3   5   6  774.69   32.28
   3   5   7 3103.61   36.30
   3   5   7 3226.80   64.88
   3   5   8  794.66   32.55
   3   5   8  838.06   17.21
   3   5   9  496.39   26.48
   3   5  10   70.78   11.69
   3   5  11   42.88    9.79
   3   5  12   19.42    8.56
  -3  -5 -12   16.17    3.47
   3   5  13   11.56    6.61
  -3  -5 -13    9.69    3.68
   3   5  14   70.82   13.47
   3   5  15    6.60    7.39
   3   5  16  391.51   29.69
   3   5  17  495.75   34.72
   3   5  18   51.62   13.89
   3   5  19  125.72   20.14
   3   6 -17   26.25   10.49
   3   6 -16    7.06    9.03
   3   6 -16   12.52   11.57
   3   6 -15  245.92   28.02
   3   6 -14   45.07   12.75
   3   6 -13  150.69   20.75
   3   6 -12  100.89   16.65
   3   6 -11   60.63   12.26
   3   6 -11   59.69   12.92
   3   6 -10  319.18   25.22
   3   6 -10  324.45   24.09
   3   6  -9   96.67   13.72
   3   6  -9  110.65   14.27
   3   6  -8  222.42   20.56
   3   6  -8  207.04   18.97
   3   6  -7  927.35   38.54
   3   6  -7 1044.98   40.98
   3   6  -6  224.07   18.15
  -3  -6   6  183.68    9.68
   3   6  -6  223.56   18.99
   3   6  -6  198.66   14.57
   3   6  -5  794.27   32.57
   3   6  -5  711.15   27.21
   3   6  -5  783.56   34.48
  -3  -6   5  751.88   20.44
   3   6  -4    2.18    3.54
   3   6  -4    4.92    4.35
  -3  -6   4   -0.51    2.81
   3   6  -4   10.42    6.57
   3   6  -3  496.81   23.01
   3   6  -3  497.48   23.49
   3   6  -3  515.99   28.14
  -3  -6   3  465.89   18.07
   3   6  -2  803.87   32.30
   3   6  -2  702.61   31.99
   3   6  -2  719.30   27.18
   3   6  -1  217.70   16.01
   3   6  -1  187.92   16.61
   3   6  -1  185.72   13.13
   3   6   0    7.27    3.59
   3   6   0   19.29    6.06
   3   6   0    6.35    5.80
   3   6   1  191.64   11.92
   3   6   1  140.44   13.22
   3   6   1  163.07   15.56
   3   6   2  868.77   34.72
   3   6   2  902.59   24.04
   3   6   3   50.44    9.77
   3   6   3   44.77    5.41
   3   6   3   42.08    8.36
   3   6   4  660.91   28.88
   3   6   4  670.48   31.22
   3   6   5  167.42   16.15
   3   6   5  159.25   14.71
   3   6   6 3944.02   72.73
   3   6   6 4001.76   76.14
   3   6   7   16.44    6.50
   3   6   7   22.13    3.83
   3   6   7   11.52    2.01
   3   6   7   18.62    6.10
   3   6   8  236.43   19.16
   3   6   8  272.38   21.23
   3   6   8  240.42   10.52
   3   6   9  929.57   38.42
   3   6   9  824.96   16.55
   3   6   9  938.76   38.47
   3   6  10  442.79   27.33
   3   6  11    4.79    6.47
   3   6  12  242.26   21.67
   3   6  13   64.31   12.86
   3   6  14  133.78   17.51
   3   6  15  114.86   17.37
   3   6  16  568.97   39.63
   3   6  17   15.38   11.37
   3   6  18  384.10   32.37
   3   6  19  456.14   35.73
   3   7 -16   94.11   17.32
   3   7 -15   20.91   11.19
   3   7 -14  190.67   24.75
   3   7 -13   31.96   14.01
   3   7 -12   32.86   10.22
   3   7 -11   61.00   13.99
   3   7 -11   66.79   13.83
   3   7 -10   -0.79    5.20
   3   7 -10    0.52    7.42
   3   7  -9  896.95   43.16
   3   7  -9 1132.79   48.70
   3   7  -8   17.15    7.23
   3   7  -8   18.41    9.21
   3   7  -7  624.88   27.70
   3   7  -7  561.10   32.15
   3   7  -7  636.57   34.37
   3   7  -6  427.91   26.71
   3   7  -6  393.89   22.05
   3   7  -6  406.33   27.80
   3   7  -5   64.70   10.72
   3   7  -5   78.60   10.79
   3   7  -5   77.27   12.88
   3   7  -4  308.45   20.82
   3   7  -4  273.74   19.22
   3   7  -4  274.95   23.03
   3   7  -3   86.17   11.86
   3   7  -3   84.94   11.26
   3   7  -3   81.27   12.69
   3   7  -2  545.95   26.39
   3   7  -2  451.76   27.83
   3   7  -2  497.36   24.54
   3   7  -1  569.75   31.27
   3   7  -1  618.35   28.27
   3   7  -1  557.11   24.65
   3   7   0   19.33    5.34
   3   7   0    8.91    5.99
   3   7   0   24.61    8.24
   3   7   1 1245.32   40.97
   3   7   1 1242.10   45.65
   3   7   1 1348.64   34.18
   3   7   2    3.25    3.03
   3   7   2    0.03    4.20
   3   7   2   -0.79    6.56
   3   7   3  342.21   21.99
   3   7   3  305.12   23.17
   3   7   4   17.99    6.68
   3   7   4    7.97    5.78
   3   7   5  107.00   14.17
   3   7   5  111.49   13.90
   3   7   6  925.74   38.32
   3   7   6  968.27   42.00
   3   7   7  153.84   16.58
   3   7   7  137.91    8.68
   3   7   7  160.89   18.68
   3   7   8  399.72   25.97
   3   7   8  384.51   14.16
   3   7   8  361.02   24.65
   3   7   9  785.24   37.31
   3   7   9  792.07   37.69
   3   7   9  771.41   19.24
   3   7  10  239.68   21.84
   3   7  10  220.57   20.75
   3   7  11 1421.29   52.45
   3   7  12   57.31   10.99
   3   7  13  133.98   16.70
   3   7  14  313.09   27.16
   3   7  15  131.80   18.20
   3   7  16  332.17   29.67
   3   7  17   10.84   10.68
   3   7  18  318.34   32.40
   3   7  19  169.13   24.26
   3   8 -14   36.77   14.17
   3   8 -13   69.30   15.49
   3   8 -12  247.89   26.91
   3   8 -11  108.69   17.40
   3   8 -11  120.35   20.37
   3   8 -10  361.51   29.45
   3   8 -10  345.09   30.54
   3   8  -9   14.46    8.20
   3   8  -9    2.82    7.49
   3   8  -8    1.51    5.67
   3   8  -8    9.33    6.72
   3   8  -7   -2.42    5.03
   3   8  -7    8.56    7.10
   3   8  -6    5.26    5.44
   3   8  -6    1.74    6.29
   3   8  -6   -3.22    6.87
   3   8  -5    0.08    5.66
   3   8  -5   13.11    6.45
   3   8  -5    0.35    6.82
   3   8  -4   26.58    8.17
   3   8  -4   11.94    6.64
   3   8  -4   21.09    7.65
   3   8  -3   74.35   11.61
   3   8  -3   90.77   13.80
   3   8  -3  107.56   13.21
   3   8  -2  224.72   19.02
   3   8  -2  200.72   20.61
   3   8  -2  205.83   17.33
   3   8  -1   57.21    9.09
   3   8  -1   60.20   12.24
   3   8  -1   48.17   10.46
   3   8   0 1997.43   54.60
   3   8   0 1918.40   60.58
   3   8   1  304.84   22.28
   3   8   1  301.92   24.24
   3   8   1  310.03   18.59
   3   8   2  617.61   34.48
   3   8   2  702.20   32.98
   3   8   3    4.01    5.75
   3   8   3    2.41    5.71
   3   8   4  120.90   14.90
   3   8   4  109.19   15.56
   3   8   5  149.90   16.93
   3   8   5  138.98   16.95
   3   8   6  135.85   14.56
   3   8   6  147.81   17.47
   3   8   6  121.94   14.86
   3   8   7  413.47   27.96
   3   8   7  380.25   28.13
   3   8   8  393.12   27.37
   3   8   8  363.12   27.68
   3   8   8  393.88   15.25
   3   8   9    9.36    6.39
   3   8   9   14.05    3.55
   3   8   9   21.43    9.11
   3   8  10   45.09   10.89
   3   8  10   41.62   10.30
   3   8  11   83.86   14.09
   3   8  11   89.06   14.87
   3   8  12  612.04   37.26
   3   8  13  141.31   18.63
   3   8  14  273.29   26.29
   3   8  15  370.50   31.43
   3   8  16   24.80   10.64
   3   8  17   72.60   17.68
   3   8  18   -1.48    9.92
   3   8  19    2.14   13.20
   3   8  20    7.28   11.09
   3   9 -13   81.76   19.44
   3   9 -12  283.48   29.93
   3   9 -11   96.65   18.24
   3   9 -10   25.21   10.66
   3   9 -10   12.21   10.22
   3   9  -9   58.74   14.84
   3   9  -9   44.45   14.04
   3   9  -8   37.93   10.60
   3   9  -8   43.33   12.53
   3   9  -7  113.87   16.79
   3   9  -7  110.17   17.74
   3   9  -6  217.36   21.37
   3   9  -6  198.91   22.53
   3   9  -5   39.60   11.20
   3   9  -5   28.87    8.73
   3   9  -5   60.62   14.66
   3   9  -4   95.70   13.61
   3   9  -4   72.64   13.26
   3   9  -4   70.02   13.59
   3   9  -3   25.13   10.11
   3   9  -3   16.99    6.28
   3   9  -3   40.84   10.43
   3   9  -2  528.32   29.49
   3   9  -2  524.10   30.20
   3   9  -2  499.88   33.83
   3   9  -1  397.11   24.55
   3   9  -1  332.69   24.63
   3   9  -1  374.26   29.21
   3   9   0  180.11   18.39
   3   9   0  193.70   16.34
   3   9   0  228.01   23.00
   3   9   1  460.77   31.77
   3   9   1  454.51   28.76
   3   9   1  541.81   26.19
   3   9   2   -5.30    6.59
   3   9   2   -6.81    7.79
   3   9   3  472.42   29.51
   3   9   3  459.23   31.88
   3   9   4  586.22   36.54
   3   9   4  579.89   33.00
   3   9   5  103.90   15.01
   3   9   5   92.74   15.46
   3   9   6    2.35    5.84
   3   9   6   -2.54    6.21
   3   9   7   42.76   10.48
   3   9   7   47.94   12.31
   3   9   8    5.80    3.87
   3   9   8   21.31    8.62
   3   9   8   10.03    6.37
   3   9   9   11.87    3.95
   3   9   9    9.85    7.07
   3   9  10   79.31   13.77
   3   9  10   75.88   14.44
   3   9  11  266.88   25.67
   3   9  11  247.35   24.93
   3   9  12   66.33   14.70
   3   9  12   52.22   13.02
   3   9  13  644.92   41.54
   3   9  14  334.77   30.10
   3   9  15  436.07   34.94
   3   9  16   64.32   15.32
   3   9  17    6.82    9.43
   3   9  18   55.36   17.69
   3   9  19   61.12   19.62
   3  10 -11   39.05   14.31
   3  10 -10   62.61   14.90
   3  10 -10   52.98   17.52
   3  10  -9   -2.43    8.42
   3  10  -9   19.29   12.46
   3  10  -8   12.88    9.20
   3  10  -8    2.05    8.82
   3  10  -7  253.65   25.33
   3  10  -7  257.76   28.85
   3  10  -6   30.83   10.08
   3  10  -6   57.59   13.76
   3  10  -5  280.05   25.19
   3  10  -5  244.48   27.22
   3  10  -4  511.14   33.02
   3  10  -4  487.10   37.15
   3  10  -4  604.34   37.45
   3  10  -3  387.88   28.09
   3  10  -3  356.48   27.57
   3  10  -3  388.84   32.79
   3  10  -2  427.37   29.41
   3  10  -2  384.25   27.12
   3  10  -2  324.40   29.68
   3  10  -1    4.97    5.91
   3  10  -1   -7.85    7.11
   3  10  -1   -6.87    8.59
   3  10   0  407.94   29.41
   3  10   0  415.28   32.65
   3  10   0  456.31   27.29
   3  10   1    1.26    4.40
   3  10   1   -5.63    8.78
   3  10   2 1038.12   45.85
   3  10   2  829.72   46.02
   3  10   3    6.55    6.94
   3  10   3   18.40    8.50
   3  10   4   95.84   15.33
   3  10   4   99.49   17.18
   3  10   5  245.07   23.27
   3  10   5  281.31   27.07
   3  10   6   46.01   11.89
   3  10   6   66.28   15.11
   3  10   7   96.36   16.77
   3  10   7   59.34   12.73
   3  10   8  295.96   27.16
   3  10   8  280.24   27.52
   3  10   9    8.38    7.52
   3  10   9   25.03   10.15
   3  10  10  168.56   21.20
   3  10  10  172.07   21.12
   3  10  11   -3.72    7.88
   3  10  11    9.45    9.50
   3  10  12  286.28   28.69
   3  10  12  270.92   28.40
   3  10  13  150.76   21.95
   3  10  14   92.76   18.80
   3  10  15   56.86   15.55
   3  10  16  138.65   23.43
   3  10  17  131.82   23.08
   3  11 -10   29.25   14.01
   3  11 -10   40.48   17.35
   3  11  -9    1.19    9.89
   3  11  -9   11.44   14.32
   3  11  -8   17.86   10.18
   3  11  -8   32.00   15.13
   3  11  -7   -0.51    8.47
   3  11  -7   -1.91    9.55
   3  11  -6  231.31   29.26
   3  11  -6  192.14   22.92
   3  11  -5   83.42   16.40
   3  11  -5   90.96   18.81
   3  11  -4   86.49   16.50
   3  11  -4   53.40   15.80
   3  11  -3  488.98   35.21
   3  11  -3  492.74   39.39
   3  11  -3  495.08   33.24
   3  11  -2   11.12    6.87
   3  11  -2   21.76   11.20
   3  11  -2   35.23   13.15
   3  11  -1  238.05   22.28
   3  11  -1  184.65   21.65
   3  11  -1  189.03   24.14
   3  11   0   22.16    8.82
   3  11   0    9.65    7.98
   3  11   0   12.93    7.83
   3  11   1  237.50   24.79
   3  11   1  199.63   24.71
   3  11   1  220.91   19.53
   3  11   2   20.99    6.36
   3  11   2   32.40    9.54
   3  11   2   28.37   11.36
   3  11   3  206.08   25.51
   3  11   3  275.24   25.65
   3  11   4    4.04    7.29
   3  11   4   -0.06    8.13
   3  11   5   15.42   11.27
   3  11   5   -8.39    8.93
   3  11   6  335.37   29.94
   3  11   6  303.35   29.60
   3  11   7  218.14   24.21
   3  11   7  226.58   27.01
   3  11   8   50.83   13.57
   3  11   8   50.34   14.83
   3  11   9  428.87   35.03
   3  11   9  482.60   38.80
   3  11  10  321.62   30.66
   3  11  10  368.91   32.90
   3  11  11  322.21   31.43
   3  11  11  298.29   31.11
   3  11  12   81.52   17.78
   3  11  12   44.61   13.61
   3  11  13    5.82    9.91
   3  11  13    4.76   10.01
   3  11  14   31.71   13.70
   3  11  15  100.29   20.65
   3  12  -9   17.58   17.63
   3  12  -8   -0.89   11.76
   3  12  -8   -4.56   13.40
   3  12  -7  272.51   31.45
   3  12  -7  342.03   37.85
   3  12  -6   15.55    8.38
   3  12  -6   17.24   14.25
   3  12  -5  217.54   25.02
   3  12  -5  283.08   33.20
   3  12  -4  357.55   31.85
   3  12  -4  269.63   32.43
   3  12  -3   96.94   15.89
   3  12  -3   62.83   16.27
   3  12  -2  714.12   45.73
   3  12  -2  604.53   45.99
   3  12  -2  630.62   38.15
   3  12  -1    4.40    7.69
   3  12  -1   -4.80   10.41
   3  12  -1   -0.45    8.32
   3  12   0   37.59   11.17
   3  12   0   41.47   13.00
   3  12   0   46.12   13.62
   3  12   1   57.90   14.69
   3  12   1   43.38   10.60
   3  12   1   42.02   13.96
   3  12   2    7.60    6.90
   3  12   2    9.55    9.19
   3  12   2    1.11    9.25
   3  12   3   22.08    9.94
   3  12   3   22.41   11.01
   3  12   4   70.16   16.45
   3  12   4   62.14   16.24
   3  12   5   75.41   15.70
   3  12   5   60.89   13.81
   3  12   6   28.47   11.67
   3  12   6    9.02   10.78
   3  12   7  131.43   21.03
   3  12   7  127.00   21.72
   3  12   8  572.25   41.59
   3  12   8  643.25   46.09
   3  12   9   -7.65    9.63
   3  12   9    5.77   10.66
   3  12  10  599.73   43.27
   3  12  10  613.52   45.24
   3  12  11  173.07   25.25
   3  12  11  148.27   22.31
   3  12  12  216.08   28.58
   3  12  13    4.10   10.29
   3  12  13    0.50   11.20
   3  13  -6    9.25   12.34
   3  13  -5   -2.20   11.12
   3  13  -5   21.81   15.36
   3  13  -4   72.82   16.53
   3  13  -4   88.36   21.15
   3  13  -3  208.67   26.10
   3  13  -3  207.69   29.79
   3  13  -2    8.12    8.81
   3  13  -2    5.36   11.47
   3  13  -1  457.47   39.91
   3  13  -1  375.11   38.91
   3  13  -1  384.30   31.20
   3  13   0   64.06   13.68
   3  13   0   70.05   17.97
   3  13   0   41.49   15.25
   3  13   1   45.37   15.23
   3  13   1   29.32   15.74
   3  13   2   69.22   17.42
   3  13   2   32.50   14.15
   3  13   3   31.55   13.22
   3  13   3   20.72   11.22
   3  13   4   25.17   13.77
   3  13   4    8.68   12.24
   3  13   5    3.59    9.18
   3  13   5   -0.35   11.13
   3  13   6  115.69   21.19
   3  13   6   83.33   19.67
   3  13   7  125.75   20.85
   3  13   7  167.68   26.61
   3  13   8    4.86   10.18
   3  13   8   25.38   13.90
   3  13   9  447.16   40.15
   3  13   9  487.43   43.29
   3  13  10   62.44   16.04
   3  13  10    3.59   10.92
   3  13  11  239.21   32.08
   3  13  12  231.08   32.03
   3  13  13   12.53   12.67
   3  14   0  121.65   23.80
   3  14   1   90.51   21.36
   3  14   2   23.87   14.45
   3  14   3   45.18   14.79
   3  14   4   11.23   12.59
   3  14   5  -12.69   11.63
  -4  13  -1   14.19   10.51
  -4  13  -2   23.18   11.27
  -4  13  -3   90.53   17.42
  -4  13  -4   96.30   18.20
  -4  12   8  115.37   20.78
  -4  12   7   72.21   17.15
  -4  12   6   62.57   16.14
  -4  12   5  417.52   35.59
  -4  12   5  413.57   34.49
  -4  12   4   71.69   15.91
  -4  12   4   52.06   14.93
  -4  12   3   25.39   10.66
  -4  12   3    6.34    9.07
  -4  12   2    2.17    7.63
  -4  12   2   13.30   12.13
  -4  12   1   -0.37    6.62
  -4  12   1    3.26    7.78
  -4  12   0  135.00   18.91
  -4  12   0  156.34   22.13
  -4  12  -1   33.83   13.01
  -4  12  -1   -4.13    9.39
  -4  12  -2   21.48    9.62
  -4  12  -2   10.44   10.03
  -4  12  -3   95.65   16.35
  -4  12  -3   81.32   17.10
  -4  12  -4   97.22   18.80
  -4  12  -4   79.30   14.46
  -4  12  -5  320.55   27.38
  -4  12  -5  289.83   31.50
  -4  11   9   26.01   12.49
  -4  11   9   16.84    8.64
  -4  11   8   12.24    8.56
  -4  11   8   15.49    9.40
  -4  11   7  230.16   25.80
  -4  11   7  209.90   23.62
  -4  11   6   10.46    9.10
  -4  11   6    2.96    7.99
  -4  11   5   75.83   14.31
  -4  11   5   79.88   15.21
  -4  11   4   85.32   14.77
  -4  11   4   76.22   15.95
  -4  11   3   11.31    9.01
  -4  11   3   20.34    9.52
  -4  11   2   21.65   10.67
  -4  11   2   28.22    9.43
  -4  11   1  395.27   31.76
  -4  11   1  444.18   30.67
  -4  11   0  103.59   17.61
  -4  11   0  125.05   16.68
  -4  11  -1   41.32   11.03
  -4  11  -1   54.43   13.65
  -4  11  -2  106.75   15.20
  -4  11  -2   90.54   16.69
  -4  11  -3   44.29   11.11
  -4  11  -3   52.50   14.07
  -4  11  -4  235.56   21.68
  -4  11  -4  277.38   27.63
  -4  11  -5   -7.68    7.45
  -4  11  -5    1.82    7.63
  -4  11  -6    6.31    8.31
  -4  11  -6   -1.00    6.31
  -4  11  -7   -7.46    8.74
  -4  11  -8   20.39   12.35
  -4  11  -9  151.45   23.40
  -4  11 -10   55.93   17.80
  -4  11 -11   90.69   21.76
  -4  10  12  473.40   36.01
  -4  10  11  156.27   21.56
  -4  10  10   -7.20    7.29
  -4  10   9   34.32    9.96
  -4  10   9    5.62    6.89
  -4  10   8  138.78   18.35
  -4  10   8  178.67   21.09
  -4  10   7   -5.25    8.47
  -4  10   7   -2.65    8.15
  -4  10   6   27.26    9.58
  -4  10   6   50.26   11.40
  -4  10   5   12.54    8.32
  -4  10   5   21.12    9.18
  -4  10   4  116.35   16.31
  -4  10   4  106.36   15.87
  -4  10   3    0.42    5.62
  -4  10   3   -0.48    7.45
  -4  10   2  518.29   31.22
  -4  10   2  527.46   34.01
  -4  10   1    5.83    6.00
  -4  10   1   25.77    9.61
  -4  10   0  443.07   28.11
  -4  10   0  441.07   30.77
  -4  10  -1  299.17   22.99
  -4  10  -1  362.08   27.98
  -4  10  -2  121.83   17.40
  -4  10  -2  128.62   14.82
  -4  10  -3  146.61   16.37
  -4  10  -3  143.71   18.13
  -4  10  -4   44.51    9.15
  -4  10  -4   58.43   12.33
  -4  10  -5   17.98    9.13
  -4  10  -5    5.62    4.91
  -4  10  -6  401.53   25.55
  -4  10  -6  498.70   34.27
  -4  10  -7   72.54   14.63
  -4  10  -7   78.62   12.87
  -4  10  -8   55.66   11.76
  -4  10  -8   85.87   16.49
  -4  10  -9   90.20   16.91
  -4  10 -10   46.58   13.91
  -4  10 -11    6.61   10.98
  -4  10 -12  109.54   21.63
  -4  10 -13  115.10   24.14
  -4   9  14  165.22   23.67
  -4   9  13  497.87   36.30
  -4   9  12    2.37    9.87
  -4   9  11  225.00   23.48
  -4   9  10   34.41   11.11
  -4   9  10    4.89    6.82
  -4   9   9    2.67    6.00
  -4   9   9    5.50    6.57
  -4   9   8  103.02   15.79
  -4   9   8   94.52   14.65
  -4   9   7  117.93   15.65
  -4   9   7  142.91   17.36
  -4   9   6   47.61   10.80
  -4   9   6   44.59   11.20
  -4   9   5   46.27   10.97
  -4   9   5   42.34   10.17
  -4   9   4    5.67    6.51
  -4   9   4    6.74    5.43
  -4   9   3  310.34   23.70
  -4   9   3  284.66   23.34
  -4   9   2   71.23   11.47
  -4   9   2   98.84   14.77
  -4   9   1  463.48   29.87
  -4   9   1  540.65   29.89
  -4   9   0   -5.61    5.83
  -4   9   0   -0.25    5.84
  -4   9  -1  172.54   18.54
  -4   9  -1  152.51   15.75
  -4   9  -2  749.03   37.55
  -4   9  -2  824.54   34.95
  -4   9  -3    3.84    4.69
  -4   9  -3   -7.58    6.82
  -4   9  -4  652.57   30.62
  -4   9  -4  680.61   36.46
  -4   9  -5  417.18   24.10
  -4   9  -5  409.56   28.34
  -4   9  -6  363.75   27.41
  -4   9  -6  397.56   23.74
  -4   9  -7    4.22    7.79
  -4   9  -7    3.41    4.99
  -4   9  -8   13.09    6.83
  -4   9  -8   30.24   10.33
  -4   9  -9   65.54   13.20
  -4   9  -9   62.16   11.23
  -4   9 -10    8.79    8.73
  -4   9 -11   16.29    9.94
  -4   9 -12   90.91   18.56
  -4   9 -13    8.69   12.10
  -4   9 -14  428.25   40.93
  -4   8  15    5.35    9.63
  -4   8  14   70.60   15.38
  -4   8  13  154.94   20.05
  -4   8  12  168.81   20.09
  -4   8  11    5.17    7.27
  -4   8  10   37.94   10.15
  -4   8  10   26.56    7.87
  -4   8   9  115.38   15.40
  -4   8   9  116.71   14.18
  -4   8   8    9.53    7.67
  -4   8   8   -5.42    5.48
  -4   8   7    8.04    5.84
  -4   8   7   11.97    6.53
  -4   8   6  269.97   21.27
  -4   8   6  256.11   20.26
  -4   8   5   14.00    7.04
  -4   8   5   16.32    6.91
  -4   8   4  538.22   29.05
  -4   8   4  577.77   30.49
  -4   8   3    3.52    5.01
  -4   8   3   15.18    5.60
  -4   8   2   10.95    6.60
  -4   8   2    6.60    4.80
  -4   8   1   10.09    5.77
  -4   8   1   12.55    5.91
  -4   8   0  633.77   30.02
  -4   8   0  615.98   31.66
  -4   8  -1  303.94   22.59
  -4   8  -1  290.23   20.03
  -4   8  -2  430.66   26.64
  -4   8  -2  421.99   23.70
  -4   8  -3  292.46   21.89
  -4   8  -3  316.18   20.22
  -4   8  -4   15.94    6.38
  -4   8  -4    2.68    3.34
  -4   8  -5   24.74    7.47
  -4   8  -5   20.28    6.35
  -4   8  -6  147.45   16.51
  -4   8  -6  153.79   13.90
  -4   8  -7    7.51    5.08
  -4   8  -7    4.34    5.18
  -4   8  -8    4.50    6.97
  -4   8  -8    6.81    5.29
  -4   8  -9   27.33    8.89
  -4   8  -9   27.69    7.38
  -4   8 -10    1.65    5.06
  -4   8 -10    3.27    6.07
  -4   8 -11  108.75   16.92
  -4   8 -12   23.99    9.10
  -4   8 -13  220.23   25.84
  -4   8 -14  158.33   23.50
  -4   7  16   26.73   14.14
   4  -7 -16   11.81   12.26
  -4   7  15  161.00   21.75
   4  -7 -15  186.77   23.72
  -4   7  14    8.07    7.58
   4  -7 -14    2.55    7.79
  -4   7  13  617.42   36.82
   4  -7 -13  659.21   38.21
  -4   7  12   84.14   13.79
   4  -7 -12   71.64   13.26
  -4   7  11  222.60   20.52
  -4   7  10   60.72   10.82
  -4   7  10   62.51   10.29
  -4   7   9  151.47   16.47
  -4   7   9  147.81   15.15
  -4   7   8   20.57    6.43
  -4   7   8    7.71    4.02
  -4   7   7  146.42   15.68
  -4   7   7  181.65   16.06
  -4   7   6   70.56   10.85
  -4   7   6   63.56   10.09
  -4   7   5  163.40   15.76
  -4   7   5  150.88   14.76
  -4   7   4  120.61   13.51
  -4   7   4   83.39   11.50
  -4   7   3   59.17    9.57
  -4   7   3   56.67    9.62
  -4   7   2  183.16   16.14
  -4   7   2  164.07   15.04
  -4   7   1   15.68    6.16
  -4   7   1   11.35    5.56
  -4   7   0  863.93   34.92
  -4   7   0  919.28   33.31
  -4   7  -1 1303.36   43.00
  -4   7  -1 1358.00   39.39
  -4   7  -2    1.52    3.86
  -4   7  -2   11.73    5.45
  -4   7  -3    0.91    4.06
  -4   7  -3   10.35    5.92
  -4   7  -4  355.01   22.71
  -4   7  -4  354.24   19.23
  -4   7  -5  463.61   26.24
  -4   7  -5  398.25   20.46
  -4   7  -6  121.91   13.85
  -4   7  -6  116.85   11.38
  -4   7  -7  300.52   22.18
  -4   7  -7  259.78   16.23
  -4   7  -8  119.14   14.67
  -4   7  -8  126.11   11.55
  -4   7  -9   31.69    6.32
  -4   7  -9   31.86    8.56
  -4   7 -10  337.82   25.96
  -4   7 -10  311.97   17.72
  -4   7 -11    4.27    4.93
  -4   7 -11   -0.10    5.50
  -4   7 -12   -4.56    6.77
  -4   7 -13  105.68   16.88
  -4   7 -14  187.32   22.85
  -4   7 -15   55.85   16.11
  -4   7 -16  117.16   22.11
  -4   7 -17   64.20   20.60
   4  -6 -17  369.49   34.00
  -4   6  16  394.75   32.69
   4  -6 -16  500.73   39.06
  -4   6  15  122.76   17.86
   4  -6 -15  116.80   20.25
   4  -6 -14  321.23   28.82
  -4   6  14  293.67   25.54
  -4   6  13   44.13   10.72
   4  -6 -13   47.04   11.37
  -4   6  12  310.90   23.76
   4  -6 -12  346.67   27.89
   4  -6 -11  145.83   18.02
  -4   6  11  140.62   15.76
  -4   6  10  224.16   19.20
  -4   6  10  181.00   14.96
   4  -6 -10  231.23   21.40
   4  -6 -10  158.02   14.01
   4  -6  -9   58.59   11.64
  -4   6   9   61.37    9.13
  -4   6   9   49.48    9.31
   4  -6  -9   58.20   10.33
  -4   6   8   16.45    6.87
   4  -6  -8   19.40    8.29
  -4   6   8   12.91    5.26
   4  -6  -8   30.18    8.65
  -4   6   7   32.88    7.67
  -4   6   7   37.98    6.94
   4  -6  -7   33.74    7.77
  -4   6   6  480.37   23.68
  -4   6   6  439.16   24.22
   4  -6  -6  429.34   23.82
  -4   6   5   80.18   10.29
  -4   6   5   68.29    9.36
   4  -6  -5   73.77   10.88
  -4   6   4  528.76   25.02
  -4   6   4  557.46   25.78
   4  -6  -4  533.00   27.39
  -4   6   3  188.08   15.52
  -4   6   3  189.55   15.06
   4  -6  -3  204.72   17.78
  -4   6   2  472.89   23.68
  -4   6   2  454.41   22.80
   4  -6  -2  491.00   26.39
  -4   6   1  537.37   25.47
  -4   6   0   29.44    6.58
  -4   6  -1   78.09   10.27
  -4   6  -2  416.75   22.27
  -4   6  -3  202.18   15.91
  -4   6  -4   65.23    9.58
  -4   6  -5   84.15   10.78
  -4   6  -6   17.09    6.48
  -4   6  -7    4.81    4.56
  -4   6  -8  138.28   14.54
  -4   6  -9    0.66    4.47
  -4   6 -10  116.69   14.20
  -4   6 -11  462.40   29.56
  -4   6 -12    1.25    5.66
  -4   6 -13  238.47   22.40
  -4   6 -14    6.76    8.39
  -4   6 -15  196.22   22.65
  -4   6 -16   12.52   10.81
  -4   6 -17  105.73   23.23
  -4   6 -18   78.52   21.52
   4  -5 -18  302.69   32.07
   4  -5 -17   28.54   12.82
   4  -5 -16   55.28   14.80
  -4   5  15  169.82   19.39
   4  -5 -15  157.75   21.55
  -4   5  14    0.87    7.29
   4  -5 -14   24.13   10.56
   4  -5 -13  104.32   15.87
  -4   5  13   91.29   13.24
   4  -5 -12  -16.52    9.25
  -4   5  12    7.71    5.91
  -4   5  11   16.10    5.69
   4  -5 -11   14.93    6.10
   4  -5 -11    3.15    5.89
  -4   5  10   11.34    5.23
   4  -5 -10    5.95    6.01
  -4   5  10    4.26    4.32
   4  -5 -10    3.83    5.69
  -4   5   9   21.04    6.48
  -4   5   9   23.14    5.83
   4  -5  -9   22.17    8.83
   4  -5  -9    5.86    5.36
   4  -5  -8   62.17   11.56
  -4   5   8   62.65    7.92
  -4   5   8   67.01    9.32
   4  -5  -8   74.77   10.85
  -4   5   7   55.16    7.80
  -4   5   7   54.37    8.79
   4  -5  -7   58.53   10.93
   4  -5  -7   66.28    9.97
  -4   5   6   12.19    4.63
   4  -5  -6    5.23    5.15
  -4   5   6    8.08    4.09
   4  -5  -6    9.90    6.45
  -4   5   5  404.57   20.09
   4  -5  -5  354.49   21.39
   4  -5  -5  399.30   23.63
  -4   5   5  325.53   19.22
  -4   5   4   20.54    5.69
  -4   5   4   25.40    5.80
   4  -5  -4   31.71    8.14
  -4   5   3 1731.91   41.38
   4  -5  -3 1571.25   44.61
  -4   5   2 1267.38   34.39
   4  -5  -2 1194.24   39.11
  -4   5   1  546.00   23.04
   4  -5  -1  476.18   25.20
  -4   5   0  302.93   17.30
   4  -5   0  294.60   20.19
  -4   5  -1  459.51   21.16
   4  -5   1  501.26   26.65
  -4   5  -2   14.87    4.38
  -4   5  -3  315.01   17.67
  -4   5  -4   24.01    5.26
  -4   5  -5  222.25   15.41
  -4   5  -6  169.60   13.54
  -4   5  -7   27.45    6.22
  -4   5  -8  517.42   25.01
  -4   5  -9  276.93   19.30
  -4   5 -10 1167.63   41.28
  -4   5 -11    4.04    4.55
  -4   5 -12 1402.40   49.48
  -4   5 -13  279.22   22.81
  -4   5 -14  165.91   18.61
  -4   5 -15   -7.51    9.82
  -4   5 -15   12.41    9.59
  -4   5 -16   26.69   11.79
  -4   5 -17   -2.66   10.97
  -4   5 -18   61.36   19.79
  -4   5 -19   -5.76   14.28
  -4   5 -20   -2.26   15.00
   4  -4 -18   81.33   19.01
   4  -4 -17   61.16   17.21
   4  -4 -16  221.55   26.51
  -4   4  15   32.49    9.49
   4  -4 -15   15.25   10.11
  -4   4  14  371.52   25.81
   4  -4 -14  359.66   29.92
  -4   4  13  430.05   26.14
   4  -4 -13  416.85   30.96
  -4   4  12   13.45    6.91
   4  -4 -12   14.09    8.70
   4  -4 -12    1.35    6.42
  -4   4  11  434.71   23.88
   4  -4 -11  447.02   26.04
   4  -4 -11  381.95   28.36
  -4   4  10   14.72    5.50
  -4   4  10   17.60    4.31
   4  -4 -10   23.75    7.72
   4  -4 -10   18.88    7.53
   4  -4  -9 1010.88   37.46
  -4   4   9 1031.48   34.38
   4  -4  -9  943.21   41.48
  -4   4   8  405.71   21.29
  -4   4   8  459.54   18.82
   4  -4  -8  427.70   24.17
   4  -4  -8  419.96   26.24
  -4   4   7    5.13    4.38
   4  -4  -7   -8.97    6.62
  -4   4   7    1.99    2.81
   4  -4  -7    6.71    6.00
  -4   4   6  403.08   18.10
   4  -4  -6  460.14   26.59
   4  -4  -6  438.72   23.80
  -4   4   6  394.02   19.32
   4  -4  -5   -3.09    6.28
  -4   4   5   -1.50    3.13
   4  -4  -5    5.84    5.67
  -4   4   4 1682.40   36.15
   4  -4  -4 1676.82   45.99
   4  -4  -4 1731.21   46.62
  -4   4   3   11.90    3.61
   4  -4  -3   19.06    6.06
   4  -4  -3   17.47    5.85
   4  -4  -2 1352.93   41.51
  -4   4   2 1462.44   33.91
  -4   4   1  716.69   24.18
   4  -4  -1  734.81   30.05
  -4   4   0  415.89   18.56
   4  -4   0  434.90   23.22
  -4   4  -1  930.58   27.52
   4  -4   1  937.50   33.52
  -4   4  -2  438.69   19.35
   4  -4   2  423.05   23.32
  -4   4  -3    7.04    3.07
   4  -4   3    4.87    4.40
  -4   4  -4  687.04   24.18
  -4   4  -5    6.33    3.71
  -4   4  -6    2.33    2.76
  -4   4  -7   92.08    9.80
  -4   4  -8  241.43   15.81
  -4   4  -9   17.90    6.08
  -4   4 -10  976.40   33.91
  -4   4 -11  723.11   30.82
  -4   4 -12   22.88    7.25
  -4   4 -13  361.25   24.11
  -4   4 -14  241.52   21.06
  -4   4 -15   92.85   14.02
  -4   4 -15  114.21   20.10
  -4   4 -16   -4.42    8.96
  -4   4 -17   74.13   18.51
  -4   4 -18    5.68   10.90
  -4   4 -19   88.11   20.85
  -4   4 -20   13.13   14.31
  -4   4 -21   40.23   18.06
   4  -3 -19  177.17   26.31
   4  -3 -18   15.71   11.30
   4  -3 -17   19.92   11.32
   4  -3 -16  246.26   26.94
   4  -3 -15  341.53   30.03
  -4   3  14   12.13    6.46
   4  -3 -14    4.47    7.73
   4  -3 -13  958.34   46.42
   4  -3 -13 1020.47   41.36
  -4   3  13 1072.54   38.52
  -4   3  12   34.91    7.38
   4  -3 -12   38.43   10.56
   4  -3 -12   22.41    9.20
  -4   3  11   49.41    8.37
   4  -3 -11   26.56    8.39
   4  -3 -11   29.98    9.04
  -4   3  10   62.26    6.21
   4  -3 -10   69.57   11.07
   4  -3 -10   54.85   11.69
  -4   3  10   70.40    9.09
  -4   3   9 1580.62   40.35
  -4   3   9 1483.92   29.03
   4  -3  -9 1480.34   50.61
   4  -3  -9 1518.88   45.27
  -4   3   8  539.22   17.95
   4  -3  -8  591.14   31.26
   4  -3  -8  538.56   26.53
  -4   3   8  495.35   21.60
  -4   3   7  529.73   17.74
  -4   3   7  550.84   21.98
   4  -3  -7  540.75   26.05
   4  -3  -7  548.49   28.82
  -4   3   6   22.07    4.47
   4  -3  -6    9.09    5.42
   4  -3  -6   21.17    6.45
  -4   3   5 1005.23   25.16
   4  -3  -5  913.14   32.75
   4  -3  -5  943.54   35.20
  -4   3   4    0.07    2.02
   4  -3  -4   -0.48    4.55
   4  -3  -4    2.19    5.01
   4  -3  -3 2017.93   48.81
  -4   3   3 1897.26   34.79
   4  -3  -3 1943.73   48.35
  -4   3   2    3.68    2.37
   4  -3  -2    5.43    4.33
   4  -3  -2    6.04    5.61
  -4   3   1  694.12   21.24
   4  -3  -1  710.19   29.10
  -4   3   0 3879.44   49.96
   4  -3   0 4010.40   68.08
  -4   3  -1  493.05   17.76
   4  -3   1  525.16   24.94
  -4   3  -2  732.36   22.14
   4  -3   2  768.09   29.89
  -4   3  -3  423.78   16.66
   4  -3   3  361.14   20.46
  -4   3  -4   69.60    7.04
   4  -3   4   62.14    8.94
  -4   3  -5 1672.01   34.61
   4  -3   5 1712.45   45.68
  -4   3  -6  189.72   12.26
  -4   3  -7    7.84    3.49
  -4   3  -8    7.86    2.84
  -4   3  -9   14.68    4.64
  -4   3 -10  777.11   28.35
  -4   3 -11  130.24   12.71
  -4   3 -12 1070.32   35.88
  -4   3 -13   11.10    5.22
  -4   3 -14  545.35   28.29
  -4   3 -15  117.42   18.19
  -4   3 -15  103.79   13.49
  -4   3 -16  178.19   21.89
  -4   3 -17   96.61   19.04
  -4   3 -18  170.36   23.40
  -4   3 -19   18.82   13.04
  -4   3 -20  115.67   22.33
  -4   3 -21  -10.41   12.56
   4  -2 -18   17.45   10.80
   4  -2 -17   62.47   16.12
   4  -2 -16  147.47   21.73
   4  -2 -15  183.16   22.56
   4  -2 -14  174.71   21.34
   4  -2 -13    1.16    6.12
  -4   2  13   -1.68    5.31
   4  -2 -13   -3.30    7.78
   4  -2 -12   84.33   14.60
   4  -2 -12   88.83   13.18
  -4   2  12  115.90   11.83
   4  -2 -11  109.84   15.07
   4  -2 -11   97.21   13.50
  -4   2  11  110.95   11.10
  -4   2  10  421.77   20.08
   4  -2 -10  360.31   25.85
   4  -2 -10  378.59   24.14
   4  -2  -9    4.56    6.64
  -4   2   9   -0.66    3.15
   4  -2  -9   -2.35    6.17
  -4   2   9    5.93    2.36
  -4   2   8  264.84   10.95
   4  -2  -8  235.46   20.55
   4  -2  -8  256.26   18.66
  -4   2   8  258.46   14.52
  -4   2   7  104.02    7.35
   4  -2  -7  108.22   14.09
   4  -2  -7   72.81   10.20
   4  -2  -6 1205.03   41.17
   4  -2  -6 1278.97   39.21
  -4   2   6 1231.51   24.63
   4  -2  -5  134.36   14.16
   4  -2  -5  139.80   13.53
  -4   2   5  125.54    8.03
   4  -2  -4  489.43   23.72
   4  -2  -4  453.04   23.54
  -4   2   4  493.92   15.69
   4  -2  -3   37.62    7.10
   4  -2  -3   26.24    6.57
   4  -2  -2  406.18   20.19
   4  -2  -2  464.50   22.37
   4  -2  -1  621.25   24.06
   4  -2  -1  810.07   29.35
   4  -2   0  762.05   24.75
   4  -2   0  890.61   31.08
   4  -2   1  932.12   31.76
   4  -2   2  124.13   12.22
   4  -2   3    8.10    4.80
   4  -2   4  894.82   31.21
   4  -2   5  232.68   16.10
   4  -2   6   -1.30    3.63
  -4   2  -7   37.04    5.38
  -4   2  -8  557.07   19.81
  -4   2  -9 1367.18   32.37
  -4   2 -10  946.74   28.46
  -4   2 -11    5.17    4.06
  -4   2 -12   95.21   10.63
  -4   2 -13  593.01   26.32
  -4   2 -14   32.59    9.46
  -4   2 -14   19.13    6.11
  -4   2 -15   -4.45    5.56
  -4   2 -15   -2.48    5.46
  -4   2 -16   73.15   13.02
  -4   2 -17    7.59    7.40
  -4   2 -18   -1.87    7.96
  -4   2 -19  492.62   36.45
  -4   2 -20   15.65   12.83
  -4   2 -21   19.67   11.49
   4  -1 -19  137.67   23.54
   4  -1 -18   87.47   18.63
   4  -1 -17  149.57   21.91
   4  -1 -16   69.23   15.28
   4  -1 -15    7.51    7.52
   4  -1 -14   33.56    9.94
   4  -1 -14   51.82   12.96
  -4   1  13   -1.35    4.39
   4  -1 -13   -3.04    6.93
   4  -1 -13    3.54    6.24
   4  -1 -12  231.59   19.30
  -4   1  12  244.15   15.24
   4  -1 -12  248.19   23.60
  -4   1  11   21.67    5.50
   4  -1 -11   11.76    7.01
   4  -1 -11    5.32    5.36
  -4   1  10  642.30   22.88
   4  -1 -10  590.83   32.33
   4  -1 -10  552.03   27.11
   4  -1  -9   60.81   11.30
  -4   1   9   55.88    4.41
   4  -1  -9   44.57    8.07
  -4   1   9   61.04    7.16
   4  -1  -8  160.11   16.56
   4  -1  -8  173.57   15.00
  -4   1   8  175.59    7.90
   4  -1  -7 1391.12   44.12
   4  -1  -7 1389.37   39.87
  -4   1   7 1503.55   23.34
   4  -1  -6  270.85   19.73
   4  -1  -6  266.01   17.34
   4  -1  -5 1261.98   40.12
   4  -1  -5 1341.53   37.96
   4  -1  -4   97.54   11.62
   4  -1  -4   84.76    9.84
   4  -1  -3  304.32   18.69
   4  -1  -3  344.40   19.16
   4  -1  -2  583.72   24.75
   4  -1  -2  543.09   23.29
  -4   1   1   -0.32    2.93
   4  -1  -1   -2.23    3.98
   4  -1  -1   -1.78    3.35
   4  -1   0  470.18   19.48
  -4   1   0  457.13   21.01
  -4   1   0  482.96   20.64
   4  -1   0  509.80   22.39
  -4   1  -1   -0.40    3.49
  -4   1  -1   -1.71    4.50
   4  -1   1   -0.83    3.09
   4  -1   1    2.86    3.50
  -4   1  -2  307.65   15.57
   4  -1   2  324.59   18.16
  -4   1  -3 1802.31   41.51
   4  -1   3 1724.77   41.89
  -4   1  -4   22.71    5.85
  -4   1  -4   13.63    6.63
   4  -1   4    9.97    4.54
  -4   1  -5  967.07   31.46
   4  -1   5  964.89   30.61
  -4   1  -6 4043.07   72.75
   4  -1   6 4544.27   65.96
   4  -1   7 6390.07   79.69
  -4   1 -12   50.56    7.41
  -4   1 -13  722.32   26.96
  -4   1 -13  611.61   29.82
  -4   1 -14  919.22   38.00
  -4   1 -14 1208.44   35.78
  -4   1 -15   65.96   10.10
  -4   1 -15   32.79    8.63
  -4   1 -16   14.57    6.85
  -4   1 -17  304.72   24.54
  -4   1 -18  504.40   31.93
  -4   1 -19   73.81   14.43
  -4   1 -20  285.01   27.02
   4   0 -19    3.57   10.46
   4   0 -18  284.09   31.53
   4   0 -17   -2.13    9.02
   4   0 -16   19.73   10.30
   4   0 -15   37.37   10.89
   4   0 -15   41.07   12.98
   4   0 -14   21.04    9.85
   4   0 -14    8.66    6.59
   4   0 -13   14.82    7.33
   4   0 -13   30.91    8.57
  -4   0  12   65.46    7.38
   4   0 -12   72.02   10.98
   4   0 -12   74.32   12.86
   4   0 -11  243.96   18.01
   4   0 -11  254.53   21.77
  -4   0  10   27.85    2.44
  -4   0  10   33.73    5.33
   4   0 -10   22.32    6.63
   4   0 -10   23.96    7.07
   4   0  -9  299.10   18.77
   4   0  -9  251.92   20.02
   4   0  -8 1065.95   34.01
   4   0  -8 1035.35   38.60
   4   0  -7  500.28   22.85
   4   0  -7  472.30   25.54
   4   0  -6  949.89   30.87
   4   0  -6  961.89   35.20
   4   0  -5 1310.68   35.59
   4   0  -5 1307.91   39.89
   4   0  -4 1828.24   44.72
   4   0  -4 1868.37   42.62
   4   0  -3    3.12    3.30
   4   0  -3    4.07    3.76
   4   0  -2  187.41   13.43
   4   0  -2  207.23   14.22
   4   0  -1   85.40    9.28
  -4   0   1   63.56    7.57
   4   0  -1   85.39    9.50
  -4   0   1   77.00    8.78
   4   0   0    9.22    4.16
  -4   0   0   12.75    4.43
   4   0   0   15.39    5.15
  -4   0   0   12.85    4.29
   4   0   1  296.80   14.03
  -4   0  -1  306.47   14.84
  -4   0  -1  333.18   16.67
  -4   0  -2  345.97   15.02
  -4   0  -2  328.44   16.72
   4   0   2  373.07   18.41
   4   0   2  324.77   13.74
  -4   0  -3  239.43   15.53
   4   0   3  253.08   15.15
  -4   0  -3  259.20   12.62
  -4   0  -4  298.20   19.34
  -4   0  -4  310.49   13.66
  -4   0  -4  272.77   15.41
   4   0   4  291.99   16.20
  -4   0  -5  674.71   29.14
  -4   0  -5  688.32   25.04
   4   0   5  658.56   24.29
  -4   0  -6 1910.29   42.31
   4   0   6 1936.24   41.35
  -4   0  -7 1162.32   33.57
   4   0   7 1128.81   31.60
  -4   0  -8   45.11    8.47
   4   0   8   58.83    7.86
  -4   0  -9  295.16   18.33
  -4   0 -12  137.96   12.60
  -4   0 -13   86.16   10.62
  -4   0 -14   33.11    6.33
  -4   0 -14   20.13    6.21
  -4   0 -15    8.96    5.26
  -4   0 -15   12.17    6.68
  -4   0 -16   21.61    6.90
  -4   0 -17  108.63   13.93
  -4   0 -18   47.62   11.07
  -4   0 -19  192.96   20.39
   4   1 -18   -3.86   10.07
   4   1 -17  220.26   26.18
   4   1 -16  138.52   20.57
   4   1 -15    4.82    8.42
   4   1 -15   -5.64    5.90
   4   1 -14   84.23   12.53
   4   1 -14   88.98   15.50
   4   1 -13  223.85   18.74
   4   1 -13  214.90   22.08
   4   1 -12  167.97   15.73
   4   1 -12  178.50   19.21
  -4  -1  11  184.18    9.90
   4   1 -11  161.78   14.79
   4   1 -11  187.44   18.83
  -4  -1  10   75.37    6.48
   4   1 -10   51.96    8.69
   4   1 -10   56.80   10.77
   4   1  -9  117.91   11.99
   4   1  -9  124.33   14.54
   4   1  -8  141.39   12.80
  -4  -1   8  112.07   10.01
   4   1  -8  144.09   14.57
   4   1  -7  960.00   30.84
   4   1  -7  977.42   35.23
   4   1  -6   35.21    6.04
   4   1  -6   35.36    7.08
  -4  -1   6   33.54    5.98
   4   1  -5  257.78   15.46
   4   1  -5  267.00   17.39
   4   1  -4   34.46    5.93
   4   1  -4   45.09    7.32
   4   1  -3  393.32   18.17
   4   1  -3  393.20   19.73
  -4  -1   2  127.30   11.47
   4   1  -2  115.79    9.82
   4   1  -2  120.13   10.77
  -4  -1   1   56.80    7.13
   4   1  -1   62.10    7.36
  -4  -1   1   47.99    6.70
   4   1  -1   45.31    6.54
   4   1   0  156.18   10.85
  -4  -1   0  126.90   11.31
  -4  -1   0  156.12   11.58
   4   1   1 1321.35   28.94
   4   1   1 1351.91   33.44
  -4  -1  -1 1397.94   30.89
  -4  -1  -1 1409.00   32.78
  -4  -1  -2  171.43   10.39
  -4  -1  -2  161.97   14.69
  -4  -1  -2  190.14   12.15
   4   1   2  190.12   12.89
   4   1   2  182.34    9.97
  -4  -1  -3  903.82   22.18
  -4  -1  -3  883.14   25.62
   4   1   3  880.27   26.93
   4   1   3  851.09   19.87
  -4  -1  -3  939.88   34.31
  -4  -1  -4   64.84   11.03
  -4  -1  -4   58.59    8.12
   4   1   4   74.42    8.08
  -4  -1  -4   64.12    5.72
  -4  -1  -5 1650.10   35.20
  -4  -1  -5 1745.76   47.30
  -4  -1  -5 1691.29   27.78
   4   1   5 1598.32   34.96
   4   1   6  117.88   13.07
  -4  -1  -6  126.70   10.44
   4   1   6  114.04    9.81
   4   1   7  676.70   30.71
  -4  -1  -7  654.58   22.91
   4   1   7  692.43   23.29
   4   1   8  763.36   33.63
  -4  -1  -8  759.37   24.94
   4   1   8  711.85   24.11
   4   1   9   86.83   11.93
  -4  -1  -9   87.45    9.61
   4   1   9   88.01    9.37
   4   1  10  481.18   27.85
  -4  -1 -10  451.44   20.73
  -4  -1 -11   57.16    7.40
   4   1  11   42.80    8.84
  -4  -1 -12  448.20   19.48
   4   1  12  475.55   28.77
  -4  -1 -12  431.40   21.24
   4   1  13   22.43    8.24
  -4  -1 -13   21.97    5.49
  -4  -1 -14  153.14   13.20
  -4  -1 -15  291.82   18.42
  -4  -1 -16   83.51   11.30
  -4  -1 -17    4.66    6.40
  -4  -1 -18  287.19   22.10
   4   2 -18   11.94   11.46
   4   2 -17   31.25   13.75
   4   2 -16   10.88   10.42
   4   2 -16   -0.91    7.74
   4   2 -15   76.93   12.60
   4   2 -15  107.39   17.75
   4   2 -14   42.25   11.87
   4   2 -14   41.74    9.14
   4   2 -13  173.48   16.26
   4   2 -13  144.75   18.41
   4   2 -12   93.62   12.45
   4   2 -12   71.61   12.47
   4   2 -11    8.57    5.75
   4   2 -11   10.67    5.53
  -4  -2  10  454.89   12.49
   4   2 -10  392.41   21.79
   4   2 -10  398.86   25.54
   4   2  -9    6.64    4.92
  -4  -2   9    2.65    4.66
   4   2  -9    3.37    4.23
  -4  -2   9    1.90    2.86
   4   2  -8  969.68   31.59
   4   2  -8  963.74   36.07
   4   2  -7  179.79   13.53
  -4  -2   7  192.36   13.13
   4   2  -7  183.66   15.19
   4   2  -6  430.25   20.14
   4   2  -6  427.96   21.98
  -4  -2   6  408.78   19.98
   4   2  -5    6.23    3.98
  -4  -2   5    1.59    5.01
   4   2  -5    5.45    3.12
  -4  -2   5    5.55    3.92
   4   2  -4   61.97    7.52
   4   2  -4   69.43    8.60
  -4  -2   4   65.53    9.45
  -4  -2   4   47.88    9.10
   4   2  -3 2391.19   43.15
   4   2  -3 2388.02   45.80
  -4  -2   2  705.65   30.83
   4   2  -2  638.36   22.52
   4   2  -2  634.21   22.97
  -4  -2   1 1126.48   30.12
   4   2  -1 1058.17   28.25
  -4  -2   0  888.78   25.13
  -4  -2   0  919.98   26.11
   4   2   0  790.77   24.60
   4   2   0  760.54   22.88
   4   2   1  141.00    9.72
  -4  -2  -1  181.89   11.92
  -4  -2  -1  169.35   10.46
   4   2   1  146.14   10.70
   4   2   2 1571.79   28.91
   4   2   2 1523.39   42.53
  -4  -2  -2 1629.65   34.30
   4   2   2 1562.87   34.12
  -4  -2  -2 1607.75   28.95
  -4  -2  -2 1709.91   48.77
   4   2   3  371.02   21.25
  -4  -2  -3  332.12   15.22
   4   2   3  360.78   16.50
  -4  -2  -3  366.43   13.27
   4   2   3  328.39   11.65
   4   2   4  919.00   17.69
  -4  -2  -4  932.56   34.13
  -4  -2  -4  791.87   23.30
   4   2   4  831.34   24.62
  -4  -2  -4  860.06   18.53
   4   2   5  164.10   14.94
  -4  -2  -5  200.59    8.43
  -4  -2  -5  163.75   11.02
   4   2   5  176.27   11.43
   4   2   6  437.97   23.71
  -4  -2  -6  504.29   18.11
   4   2   6  507.37   18.48
  -4  -2  -6  515.03   12.37
   4   2   7   17.01    6.71
  -4  -2  -7   19.67    5.67
  -4  -2  -7   28.11    3.97
   4   2   7   18.22    4.20
   4   2   8    3.61    4.51
  -4  -2  -8    3.34    4.28
   4   2   8    1.30    2.72
   4   2   9  284.29   20.54
  -4  -2  -9  305.31   14.18
   4   2   9  315.54   15.68
  -4  -2 -10    5.20    2.62
   4   2  10    4.06    6.36
  -4  -2 -10    7.83    4.47
  -4  -2 -11  458.55   16.59
   4   2  11  417.95   26.55
  -4  -2 -11  453.38   17.71
   4   2  12  520.32   29.76
  -4  -2 -12  476.17   18.82
  -4  -2 -12  504.29   18.37
  -4  -2 -13   91.32    8.84
   4   2  13   73.03   12.84
  -4  -2 -13   80.78    9.29
   4   2  14  531.36   32.33
  -4  -2 -14  508.48   22.29
   4   2  15 1135.02   48.00
  -4  -2 -15 1098.22   34.95
   4   2  16   66.51   13.46
  -4  -2 -16   51.50    9.05
   4   2  17  249.14   24.73
  -4  -2 -17  284.96   20.67
   4   2  18   63.38   13.21
   4   3 -17    5.66    7.54
   4   3 -17   21.29   12.74
   4   3 -16   73.35   13.60
   4   3 -16   86.42   17.83
   4   3 -15   25.03   10.38
   4   3 -15   28.53    9.08
   4   3 -14   20.21    8.59
   4   3 -14   28.00    7.70
   4   3 -13   11.52    7.34
   4   3 -13    9.66    6.34
   4   3 -12  199.25   17.21
   4   3 -12  168.33   18.50
   4   3 -11  834.11   33.83
   4   3 -11  774.75   37.57
   4   3 -10  126.85   13.11
   4   3 -10  183.10   18.15
   4   3  -9 1950.84   55.15
   4   3  -9 2031.81   48.90
  -4  -3   8   86.47    9.36
   4   3  -8  100.80   10.92
   4   3  -8  100.55   12.29
   4   3  -7   63.53    8.50
  -4  -3   7   73.41    9.01
  -4  -3   7   64.12    8.40
   4   3  -7   70.50    9.84
  -4  -3   6   56.42    8.18
   4   3  -6   47.97    7.15
   4   3  -6   44.42    8.11
  -4  -3   6   45.09    7.42
   4   3  -5  205.63   13.83
   4   3  -5  218.31   15.52
  -4  -3   5  255.45   16.42
  -4  -3   5  230.79   16.37
  -4  -3   4   38.00    8.43
   4   3  -4   36.56    6.58
  -4  -3   4   30.40    7.40
   4   3  -4   35.14    5.92
  -4  -3   3  484.01   25.34
   4   3  -3  541.17   21.07
   4   3  -3  515.17   21.14
   4   3  -2   19.32    4.45
   4   3  -2   15.58    4.24
  -4  -3   1   73.74   10.35
   4   3  -1   57.01    8.71
   4   3  -1   55.97    7.00
   4   3  -1   51.66    6.22
  -4  -3   1   52.04    7.60
  -4  -3   0    4.40    3.33
  -4  -3   0    1.20    5.78
   4   3   0    9.95    4.77
   4   3   0    5.19    3.37
   4   3   0    7.89    2.69
  -4  -3  -1 2299.64   36.42
   4   3   1 2176.98   38.71
   4   3   1 2172.13   35.34
   4   3   1 2216.83   50.53
  -4  -3  -2  267.51   11.54
   4   3   2  244.77   17.03
   4   3   2  211.29   12.30
   4   3   2  226.14   10.74
  -4  -3  -3 2018.01   27.40
   4   3   3 1949.36   47.26
  -4  -3  -3 2009.86   37.49
   4   3   3 2041.06   28.35
   4   3   3 1958.14   36.92
  -4  -3  -4 1018.21   16.59
   4   3   4 1103.62   27.76
  -4  -3  -4  905.35   23.83
   4   3   4 1029.90   16.93
   4   3   4  955.04   33.18
   4   3   5 1280.89   39.72
   4   3   5 1380.50   30.64
  -4  -3  -6  132.43    9.08
   4   3   6  130.58    9.60
   4   3   6  120.35   12.80
   4   3   7   32.26    7.21
  -4  -3  -7   54.65    6.44
   4   3   7   42.03    5.47
   4   3   8  282.25   19.81
  -4  -3  -8  314.07   12.81
   4   3   8  326.52   14.38
   4   3   9  244.46   18.79
  -4  -3  -9  237.58   10.97
  -4  -3  -9  218.33    7.33
   4   3  10  944.91   37.59
  -4  -3 -10  892.07   20.81
   4   3  11   21.71    8.07
  -4  -3 -11   33.03    5.54
  -4  -3 -11   32.51    4.75
   4   3  12   69.34   11.47
  -4  -3 -12  103.48    8.54
   4   3  13   81.95   13.91
  -4  -3 -13   91.78    8.70
  -4  -3 -14  373.17   18.43
   4   3  14  341.70   25.90
   4   3  15  941.77   43.78
  -4  -3 -15  939.26   31.35
   4   3  16  103.51   16.50
  -4  -3 -16  102.17   12.30
   4   3  17    1.24    7.53
   4   3  18  136.07   19.65
   4   4 -17   12.77   10.49
   4   4 -17  -10.95    8.90
   4   4 -16    0.62    7.97
   4   4 -16   11.41    8.35
   4   4 -15   11.36    7.20
   4   4 -15    0.03    7.66
   4   4 -14    2.84    4.98
   4   4 -14   -9.89    9.46
   4   4 -13  261.33   21.26
   4   4 -13  315.98   27.18
   4   4 -12  166.11   16.85
   4   4 -12  143.51   18.12
   4   4 -11  344.63   22.26
   4   4 -11  340.20   26.34
   4   4 -10  959.24   35.61
   4   4 -10 1032.29   42.57
   4   4  -9   53.20    8.91
   4   4  -9   40.74    9.20
  -4  -4   8  134.31    7.00
   4   4  -8  153.83   13.88
  -4  -4   7  267.34   11.98
   4   4  -7  267.73   19.84
   4   4  -7  279.04   18.49
  -4  -4   6   20.66    4.52
   4   4  -6   10.13    4.60
   4   4  -6   11.96    4.93
  -4  -4   5    0.57    3.53
   4   4  -5    7.99    4.59
   4   4  -5    3.94    4.19
  -4  -4   4    9.65    3.55
   4   4  -4   12.42    4.39
   4   4  -4   13.93    4.72
  -4  -4   3   76.56    8.34
   4   4  -3   81.48    9.11
   4   4  -3   54.75    8.68
   4   4  -3   72.21    8.57
  -4  -4   2   19.61    6.50
   4   4  -2   26.58    5.50
   4   4  -2   23.43    7.67
   4   4  -2   28.89    5.47
  -4  -4   1   52.30    8.69
   4   4  -1   66.08    9.30
   4   4  -1   51.44    6.23
   4   4  -1   52.89    6.98
  -4  -4   0 1503.68   34.44
   4   4   0 1521.59   31.20
   4   4   0 1559.51   33.54
   4   4   1  824.01   21.28
   4   4   1  878.06   25.33
  -4  -4  -1  886.18   23.53
   4   4   2 3484.25   64.88
   4   4   2 3329.24   47.94
   4   4   3 2563.38   40.79
   4   4   3 2465.66   31.23
   4   4   3 2601.55   55.91
   4   4   4  369.74   15.70
   4   4   4  343.28   20.50
   4   4   4  388.80   10.93
   4   4   5 1570.05   43.46
   4   4   5 1764.14   34.19
   4   4   6    3.56    3.31
   4   4   6    5.66    5.35
   4   4   7   77.29   10.79
   4   4   7   78.99    7.28
   4   4   8  294.64   20.26
   4   4   8  311.94   13.25
   4   4   9   17.76    7.10
   4   4   9   28.72    4.81
   4   4  10   87.17   13.70
   4   4  10   67.54    6.88
   4   4  11   12.11    6.41
   4   4  12   37.12    9.29
  -4  -4 -12   24.30    3.20
  -4  -4 -13  166.68    9.45
   4   4  13  217.00   20.03
   4   4  14  397.96   28.96
  -4  -4 -14  324.25   14.42
   4   4  15   45.61   12.13
   4   4  16    2.31    6.52
   4   4  17  681.72   41.14
   4   4  18  145.03   21.34
   4   4  19  105.23   20.01
   4   5 -17   12.29    8.97
   4   5 -16   37.44   13.97
   4   5 -16   35.68   11.51
   4   5 -15   23.92   10.29
   4   5 -15   25.40    9.93
   4   5 -14   21.55    8.63
   4   5 -14   47.39   13.18
   4   5 -13  135.93   16.27
   4   5 -13  133.18   19.42
   4   5 -12  272.73   21.58
   4   5 -12  251.99   24.45
   4   5 -11  174.06   17.31
   4   5 -11  169.87   19.22
   4   5 -10  137.76   17.01
   4   5 -10  166.43   16.41
   4   5  -9  185.43   18.57
   4   5  -9  169.48   16.18
   4   5  -8  144.75   15.95
  -4  -5   7  896.58   20.07
   4   5  -7  826.22   35.49
  -4  -5   6   21.18    4.50
   4   5  -6   14.27    6.22
   4   5  -6   14.07    7.65
  -4  -5   5  525.55   19.07
   4   5  -5  464.07   24.24
   4   5  -5  497.30   27.07
  -4  -5   4  108.70    9.49
   4   5  -4  102.92   11.93
   4   5  -4  102.93   11.28
   4   5  -4  105.01   13.09
   4   5  -3  553.90   23.48
   4   5  -3  582.48   26.75
  -4  -5   3  519.82   21.37
   4   5  -3  624.51   30.47
   4   5  -2   15.38    5.84
   4   5  -2   13.61    3.97
   4   5  -2   23.77    7.31
   4   5  -1  247.58   17.42
   4   5  -1  272.57   20.28
   4   5   0   -0.14    4.19
   4   5   0   -2.16    3.10
   4   5   0    0.22    2.07
   4   5   0   -0.83    4.01
   4   5   1  440.37   23.29
   4   5   1  386.34   17.42
   4   5   1  394.31   15.70
   4   5   2   19.66    6.60
   4   5   2   12.95    3.82
   4   5   2   13.85    3.39
   4   5   2   20.71    6.53
   4   5   3  550.36   26.74
   4   5   3  474.76   14.60
   4   5   3  488.74   26.25
   4   5   3  473.55   18.23
   4   5   4  454.08   25.47
   4   5   4  410.22   11.67
   4   5   4  455.66   25.39
   4   5   4  410.89   16.60
   4   5   5  756.94   33.46
   4   5   5  683.95   21.13
   4   5   6  197.96   17.86
   4   5   6  210.14   11.86
   4   5   7   75.37   12.04
   4   5   7   92.35    8.02
   4   5   8   10.71    4.94
   4   5   8   10.75    3.97
   4   5   9    0.81    5.25
   4   5   9   -1.21    2.33
   4   5  10   22.17    8.07
   4   5  10   10.92    2.94
   4   5  11  274.08   22.73
   4   5  12  141.98   17.16
   4   5  13  190.78   19.14
   4   5  14   58.67   12.22
   4   5  15  830.07   42.53
   4   5  16  747.42   42.37
   4   5  17  352.87   30.61
   4   5  18  167.48   22.47
   4   5  19   16.83   10.51
   4   6 -17   79.67   16.85
   4   6 -16    5.85   10.09
   4   6 -15  116.34   20.34
   4   6 -15   78.53   14.62
   4   6 -14  130.70   17.39
   4   6 -14  194.70   24.52
   4   6 -13   21.00    7.81
   4   6 -13   43.16   12.18
   4   6 -12   71.35   14.27
   4   6 -12   56.53   11.67
   4   6 -11  112.79   16.93
   4   6 -10  477.90   32.46
   4   6  -9  274.10   23.32
   4   6  -8  562.41   31.74
   4   6  -8  538.38   31.24
   4   6  -7  101.45   13.08
   4   6  -7  118.44   15.33
   4   6  -6  994.87   38.33
   4   6  -6 1027.68   42.38
  -4  -6   5  682.84   21.79
   4   6  -5  759.96   31.71
   4   6  -5  743.51   35.73
   4   6  -4   87.41   11.92
   4   6  -4   80.26   10.32
   4   6  -4   74.26   12.28
   4   6  -3   19.79    7.37
   4   6  -3   22.22    5.66
   4   6  -3   21.75    8.58
   4   6  -2  533.66   23.44
   4   6  -2  592.86   28.63
   4   6  -2  590.74   31.13
   4   6  -1   49.22    9.49
   4   6  -1   26.86    5.32
   4   6  -1   61.79   10.88
   4   6   0  344.97   17.20
   4   6   0  417.72   23.63
   4   6   0  371.13   24.56
   4   6   1   79.45    8.01
   4   6   1   86.60   11.62
   4   6   1   90.00   12.44
   4   6   2  718.64   33.21
   4   6   2  735.38   33.67
   4   6   3    7.79    3.74
   4   6   3    3.22    2.60
   4   6   3    0.22    4.68
   4   6   3   10.27    6.02
   4   6   4 1441.68   48.34
   4   6   4 1249.10   22.76
   4   6   4 1188.63   28.88
   4   6   4 1399.73   48.31
   4   6   5  608.79   31.06
   4   6   5  491.43   12.28
   4   6   5  534.87   19.31
   4   6   5  562.48   30.86
   4   6   6   -0.26    1.55
   4   6   6    6.43    6.32
   4   6   6    8.56    3.77
   4   6   6   -2.26    5.98
   4   6   7    3.92    5.57
   4   6   7    5.15    3.59
   4   6   8  579.43   31.99
   4   6   8  578.95   19.24
   4   6   9  314.19   24.37
   4   6   9  346.53   14.21
   4   6  10  798.71   39.65
   4   6  10  573.51   16.02
   4   6  11   88.26   15.17
   4   6  12  113.35   16.64
   4   6  13   69.58   13.40
   4   6  14  176.35   21.05
   4   6  15    8.37    8.68
   4   6  16  204.80   22.75
   4   6  17   78.87   16.60
   4   6  18    4.03    9.66
   4   6  19  356.20   33.62
   4   6  20   25.15   12.09
   4   7 -15  103.39   18.09
   4   7 -14  138.50   19.45
   4   7 -14  134.87   21.82
   4   7 -13  227.94   26.75
   4   7 -13  214.34   23.87
   4   7 -12    0.31    6.92
   4   7 -11   10.27    7.54
   4   7 -10   19.31    8.52
   4   7  -9  200.98   21.31
   4   7  -9  192.72   20.84
   4   7  -8   51.93   11.26
   4   7  -8   74.69   14.47
   4   7  -7  418.95   27.60
   4   7  -7  476.82   31.70
   4   7  -6    6.33    7.06
   4   7  -6    6.56    4.63
   4   7  -6   11.13    8.73
   4   7  -5  908.49   36.18
   4   7  -5  871.29   36.10
   4   7  -5  894.48   41.71
   4   7  -4    4.56    6.43
   4   7  -4    1.64    4.41
   4   7  -4   -3.23    6.43
   4   7  -3  558.36   27.54
   4   7  -3  603.60   30.66
   4   7  -3  645.23   35.61
   4   7  -2    9.23    5.26
   4   7  -2    5.52    6.99
   4   7  -2    5.86    6.62
   4   7  -1 1163.43   35.79
   4   7  -1 1209.16   42.07
   4   7   0  314.64   17.63
   4   7   0  360.78   24.46
   4   7   0  328.25   25.52
   4   7   1   96.71    9.25
   4   7   1  127.72   16.04
   4   7   1  111.93   15.36
   4   7   2   78.42    8.02
   4   7   2   90.65   13.55
   4   7   2   96.32   14.58
   4   7   3  375.33   15.74
   4   7   3  465.46   29.29
   4   7   3  465.37   27.72
   4   7   4   -2.41    5.82
   4   7   4    6.29    3.27
   4   7   4    5.63    3.92
   4   7   4    3.93    6.63
   4   7   5  316.62   11.83
   4   7   5  372.54   25.30
   4   7   5  312.54   15.12
   4   7   5  334.66   25.02
   4   7   6  362.56   16.40
   4   7   6  323.74   10.21
   4   7   6  365.19   25.95
   4   7   6  377.11   27.32
   4   7   7  126.29   15.92
   4   7   7  119.55    9.70
   4   7   7  131.06   16.79
   4   7   8   22.33    8.62
   4   7   8   36.34    5.51
   4   7   8   39.46   10.25
   4   7   9 2220.78   65.99
   4   7   9 2407.55   39.52
   4   7  10  249.27   11.86
   4   7  10  265.04   23.67
   4   7  11  102.95   15.73
   4   7  12  124.30   17.49
   4   7  13  153.63   20.93
   4   7  14  121.54   20.21
   4   7  15   76.20   16.47
   4   7  16  172.78   22.51
   4   7  17   36.51   12.40
   4   7  18  288.81   29.74
   4   7  19   17.65   11.82
   4   7  20    2.13   11.10
   4   8 -14   77.07   16.59
   4   8 -13  111.43   20.73
   4   8 -12  148.66   22.85
   4   8 -11    3.23    7.01
   4   8 -10    0.87    6.56
   4   8 -10   18.79   11.06
   4   8  -9    2.49    6.49
   4   8  -9   15.49   10.62
   4   8  -8  153.50   18.76
   4   8  -8  115.70   17.63
   4   8  -7   24.74    8.46
   4   8  -7    6.66    7.44
   4   8  -6   72.98   12.91
   4   8  -6   87.31   13.25
   4   8  -6   95.07   16.22
   4   8  -5  232.41   20.78
   4   8  -5  276.75   21.87
   4   8  -5  255.34   24.84
   4   8  -4  421.04   26.27
   4   8  -4  413.15   27.00
   4   8  -4  486.05   33.89
   4   8  -3  313.79   22.08
   4   8  -3  352.01   25.25
   4   8  -2  810.72   33.46
   4   8  -2  827.88   36.63
   4   8  -2  883.58   44.12
   4   8  -1   33.79    6.53
   4   8  -1   21.37    8.89
   4   8   0  995.87   32.78
   4   8   0 1070.15   48.24
   4   8   1   64.11   11.57
   4   8   1   45.22    7.18
   4   8   1   65.45   13.45
   4   8   2  139.92   11.44
   4   8   2  168.69   17.98
   4   8   3   22.19    8.00
   4   8   3   30.79    5.35
   4   8   4    3.59    2.89
   4   8   4    5.46    6.15
   4   8   4   -1.09    7.18
   4   8   5   78.70    7.06
   4   8   5   67.25    8.23
   4   8   5   66.27   11.95
   4   8   5   70.04   12.58
   4   8   6    1.04    1.80
   4   8   6   -2.79    3.57
   4   8   6   -9.67    8.24
   4   8   6   -0.02    7.43
   4   8   7    3.28    6.03
   4   8   7    7.53    2.31
   4   8   7   10.14    4.03
   4   8   7   14.05    7.68
   4   8   8   29.47    5.44
   4   8   8   12.36    5.78
   4   8   8   27.75   11.08
   4   8   9  958.73   26.54
   4   8   9  929.39   44.87
   4   8   9  933.84   45.03
   4   8  10   46.50   11.92
   4   8  11    6.01    6.87
   4   8  12  384.08   31.17
   4   8  13 1018.29   51.18
   4   8  14   16.64    9.03
   4   8  15  387.99   36.54
   4   8  16   -7.47    8.75
   4   8  17   56.50   16.86
   4   8  18   25.38   11.75
   4   8  19    3.78   10.03
   4   8  20   26.63   15.82
   4   9 -12   10.95   11.01
   4   9 -11  134.79   21.83
   4   9 -10   83.88   16.45
   4   9 -10   76.74   17.45
   4   9  -9  153.01   20.72
   4   9  -9  216.46   26.46
   4   9  -8  409.01   31.78
   4   9  -8  461.64   36.04
   4   9  -7   26.48    8.50
   4   9  -7   43.72   12.98
   4   9  -6   36.23   10.57
   4   9  -6   50.27   13.88
   4   9  -5  102.34   15.38
   4   9  -5   91.84   14.25
   4   9  -5  137.21   20.24
   4   9  -4   25.31   11.11
   4   9  -4   27.51    8.68
   4   9  -4   48.59   13.05
   4   9  -3  308.55   22.55
   4   9  -3  306.78   24.39
   4   9  -3  370.60   31.38
   4   9  -2  494.98   27.35
   4   9  -2  479.86   31.47
   4   9  -2  543.99   37.36
   4   9  -1 1156.50   39.88
   4   9  -1 1311.20   53.77
   4   9  -1 1257.75   55.51
   4   9   0   95.61   11.85
   4   9   0  122.38   17.71
   4   9   0   76.25   14.60
   4   9   1  667.24   28.19
   4   9   1  679.40   36.87
   4   9   1  599.51   38.57
   4   9   2  382.90   20.45
   4   9   2  391.20   28.24
   4   9   2  434.40   33.04
   4   9   3  102.33   10.54
   4   9   3   93.89   14.53
   4   9   3  112.80   16.99
   4   9   4  465.57   20.43
   4   9   4  494.52   32.23
   4   9   4  477.68   34.94
   4   9   5    1.63    3.32
   4   9   5   -3.22    5.72
   4   9   5   -1.21    8.88
   4   9   6   30.55    5.12
   4   9   6   43.55    7.14
   4   9   6   20.91    8.26
   4   9   6   49.13   11.56
   4   9   7   48.36   11.47
   4   9   7   51.54    7.19
   4   9   7   52.84   11.72
   4   9   8   20.34    9.68
   4   9   8    6.92    3.80
   4   9   8   17.70    9.05
   4   9   9  305.80   27.10
   4   9   9  281.22   26.86
   4   9  10   14.94    7.48
   4   9  10    7.94    8.88
   4   9  11  606.03   39.72
   4   9  12  126.98   19.36
   4   9  13  518.04   38.24
   4   9  14  376.66   33.59
   4   9  15   61.76   17.37
   4   9  16   33.49   16.46
   4   9  17   94.13   20.12
   4   9  18    9.16   12.19
   4   9  19   -3.35   13.07
   4  10 -11   38.40   14.27
   4  10 -10   94.95   18.59
   4  10  -9   81.98   17.16
   4  10  -9   61.60   17.40
   4  10  -8    2.04    8.11
   4  10  -8   23.70   12.79
   4  10  -7   25.43   10.61
   4  10  -7   46.80   14.14
   4  10  -6  173.40   21.22
   4  10  -6  142.53   22.62
   4  10  -5   16.16    8.16
   4  10  -5    7.48   10.75
   4  10  -4  213.69   21.40
   4  10  -4  226.58   23.15
   4  10  -4  219.97   26.75
   4  10  -3  169.05   18.27
   4  10  -3  197.19   21.40
   4  10  -3  172.39   23.30
   4  10  -2  271.33   26.40
   4  10  -2  270.15   28.83
   4  10  -2  230.01   20.14
   4  10  -1    2.19    7.52
   4  10  -1   14.83    7.26
   4  10  -1   10.16    9.02
   4  10   0  693.82   32.16
   4  10   0  779.02   43.27
   4  10   0  671.49   44.05
   4  10   1  127.27   17.65
   4  10   1  155.08   15.53
   4  10   1  184.01   23.33
   4  10   2  360.84   21.76
   4  10   2  347.78   29.32
   4  10   2  367.36   32.32
   4  10   3  361.68   20.61
   4  10   3  333.53   28.07
   4  10   3  386.91   33.75
   4  10   4   22.28    6.21
   4  10   4    1.73    6.64
   4  10   4    5.58   11.02
   4  10   5   47.38   12.70
   4  10   5   26.41    9.98
   4  10   5   38.41    6.97
   4  10   6  468.07   33.54
   4  10   6  402.12   33.33
   4  10   7  121.00   18.92
   4  10   7   74.83    9.07
   4  10   7  129.51   20.43
   4  10   8  217.80   24.48
   4  10   8  146.70   12.16
   4  10   8  192.89   22.86
   4  10   9   10.79    9.76
   4  10   9    5.10    7.44
   4  10  10  247.96   26.85
   4  10  10  245.51   26.34
   4  10  11    5.94    8.85
   4  10  11    1.40    8.09
   4  10  12  303.69   30.35
   4  10  13  262.56   28.88
   4  10  14   40.87   14.25
   4  10  15  235.52   29.75
   4  10  16   81.74   20.64
   4  10  17   20.53   15.54
   4  11  -9   10.47    9.29
   4  11  -9   -7.72   13.57
   4  11  -8  186.99   24.79
   4  11  -8  180.38   27.80
   4  11  -7  288.87   29.71
   4  11  -7  315.43   35.42
   4  11  -6   31.86   11.58
   4  11  -6   29.61   14.86
   4  11  -5  273.06   26.55
   4  11  -5  296.51   33.88
   4  11  -4   24.59   10.04
   4  11  -4   23.22   13.38
   4  11  -3  128.18   17.00
   4  11  -3  125.91   19.86
   4  11  -3  154.68   24.12
   4  11  -2    6.99    5.77
   4  11  -2   21.39   12.43
   4  11  -2   13.79   10.84
   4  11  -1   63.07   12.23
   4  11  -1   60.79   16.54
   4  11  -1   68.61   16.25
   4  11   0   30.40   13.29
   4  11   0   11.19    6.15
   4  11   0    3.93    8.86
   4  11   1  373.25   25.11
   4  11   1  431.08   34.32
   4  11   1  413.56   36.75
   4  11   2   86.96   11.96
   4  11   2   88.32   17.06
   4  11   2   71.14   16.88
   4  11   3   18.17    6.34
   4  11   3   27.88   11.99
   4  11   4  240.72   25.99
   4  11   4  238.86   27.90
   4  11   5 1133.10   54.82
   4  11   5 1204.17   61.85
   4  11   6  193.71   23.68
   4  11   6  127.54   22.07
   4  11   7  462.73   35.76
   4  11   7  415.63   35.51
   4  11   8   49.03   13.41
   4  11   8   60.87   14.98
   4  11   9  446.00   36.63
   4  11   9  459.87   37.36
   4  11  10   95.02   18.14
   4  11  10  109.58   20.72
   4  11  11  169.08   23.72
   4  11  11  218.63   26.58
   4  11  12   48.19   15.85
   4  11  13   76.73   17.85
   4  11  14   23.63   13.69
   4  11  15   44.24   17.08
   4  12  -8    8.73   13.76
   4  12  -7  236.30   27.56
   4  12  -7  315.18   38.11
   4  12  -6   38.37   13.20
   4  12  -6   66.70   19.64
   4  12  -5    9.46    9.18
   4  12  -5    3.19   12.27
   4  12  -4  312.04   29.08
   4  12  -4  360.93   38.73
   4  12  -3   10.13    8.04
   4  12  -3    1.18   11.27
   4  12  -2   92.43   20.48
   4  12  -2   62.25   12.96
   4  12  -2   65.51   18.19
   4  12  -1   13.88   13.17
   4  12  -1   11.21    8.34
   4  12  -1    2.81   10.81
   4  12   0   15.77   12.13
   4  12   0   27.39    9.33
   4  12   1   26.77   12.66
   4  12   1   24.76    7.95
   4  12   1   46.95   17.30
   4  12   2   28.16   11.69
   4  12   2   63.33   19.45
   4  12   3   32.63   13.09
   4  12   3   34.32   14.94
   4  12   4  109.06   19.25
   4  12   4  106.41   21.32
   4  12   5  -13.79    9.15
   4  12   5   -3.69   10.16
   4  12   6  296.86   30.56
   4  12   6  304.03   33.79
   4  12   7   10.71   10.52
   4  12   7   -4.21    9.53
   4  12   8  273.14   30.10
   4  12   8  246.09   29.80
   4  12   9  187.68   25.44
   4  12   9  128.74   21.91
   4  12  10  174.03   25.17
   4  12  10  196.00   28.93
   4  12  11  214.01   28.55
   4  12  11  203.11   26.97
   4  12  12  176.58   27.26
   4  12  12  167.72   25.15
   4  12  13   -4.87   10.42
   4  13  -5    9.02   10.98
   4  13  -4   65.59   16.52
   4  13  -4   75.86   23.49
   4  13  -3  131.98   20.74
   4  13  -3  158.83   29.81
   4  13  -2    8.47    9.12
   4  13  -2   29.25   16.90
   4  13  -1   62.68   20.91
   4  13   0   -1.20   13.24
   4  13   0    4.64   12.29
   4  13   1   50.29   17.36
   4  13   1   75.74   19.68
   4  13   2   33.20   13.18
   4  13   2   32.57   16.39
   4  13   3   25.93   12.99
   4  13   3   19.08   12.97
   4  13   4   -7.83   10.11
   4  13   4   -0.72   10.77
   4  13   5  100.25   21.25
   4  13   5  108.29   23.13
   4  13   6  418.82   38.91
   4  13   6  442.08   41.45
   4  13   7  227.68   29.03
   4  13   7  249.81   31.88
   4  13   8   62.40   17.97
   4  13   8   78.29   20.88
   4  13   9  235.82   30.86
   4  13   9  247.16   32.35
   4  13  10  228.71   31.97
   4  13  11   48.86   16.19
   4  13  12   22.01   16.08
   4  14   1    5.96   14.92
   4  14   2  101.83   24.86
   4  14   4  360.48   39.43
   4  14   5  299.40   35.62
  -5  12   6    5.23   10.81
  -5  12   5   39.27   13.39
  -5  12   4   16.07   11.57
  -5  12   3    6.44    8.98
  -5  12   2   11.40    9.91
  -5  12   2    0.83    9.57
  -5  12   1   73.31   16.01
  -5  12   1   81.53   18.34
  -5  12   0   15.17    8.96
  -5  12   0   17.97   11.32
  -5  12  -1   35.08   12.21
  -5  12  -1  -13.88   12.24
  -5  12  -2  165.57   20.83
  -5  12  -3  191.28   21.98
  -5  12  -4  201.33   22.16
  -5  12  -5  214.11   22.86
  -5  11   8   31.52   12.99
  -5  11   7  -11.93    9.72
  -5  11   7    1.68    8.58
  -5  11   6  124.45   20.09
  -5  11   6  116.88   18.94
  -5  11   5   19.40    9.53
  -5  11   5   30.41   11.11
  -5  11   4   97.84   17.27
  -5  11   4   43.51   13.10
  -5  11   3  143.93   21.28
  -5  11   3  173.73   21.02
  -5  11   2  284.27   26.60
  -5  11   2  232.04   25.89
  -5  11   1  112.09   17.51
  -5  11   1  115.27   18.99
  -5  11   0  288.23   27.74
  -5  11   0  222.12   22.65
  -5  11  -1   46.98   11.64
  -5  11  -1   63.50   14.09
  -5  11  -2   45.61   11.42
  -5  11  -2   20.82   10.37
  -5  11  -3  304.75   24.95
  -5  11  -3  317.51   29.31
  -5  11  -4  218.08   20.86
  -5  11  -4  226.79   25.17
  -5  11  -5   68.96   13.06
  -5  11  -5   67.98   16.55
  -5  11  -6   86.06   14.01
  -5  11  -6   62.35   15.21
  -5  11  -7  118.36   16.67
  -5  11  -7  141.42   21.38
  -5  11  -8   19.94   11.38
  -5  11  -9   72.35   16.98
  -5  10  10   54.18   13.86
  -5  10   9   11.68    7.24
  -5  10   9   17.93    9.85
  -5  10   8  106.77   17.50
  -5  10   8   68.20   14.26
  -5  10   7   -7.70    7.99
  -5  10   7    4.47    8.43
  -5  10   6   18.87    9.86
  -5  10   6   11.90    7.31
  -5  10   5  201.41   22.54
  -5  10   5  171.79   20.39
  -5  10   4   75.96   14.13
  -5  10   4  123.29   17.85
  -5  10   3   14.22    9.33
  -5  10   3    0.18    6.03
  -5  10   2  254.12   23.35
  -5  10   2  237.69   23.80
  -5  10   1  384.92   29.84
  -5  10   1  387.37   28.16
  -5  10   0  249.76   24.10
  -5  10   0  221.50   21.10
  -5  10  -1   73.22   12.84
  -5  10  -1   79.41   14.87
  -5  10  -2    9.99    7.42
  -5  10  -2    3.53    6.43
  -5  10  -3    3.94    6.04
  -5  10  -3   20.98    9.58
  -5  10  -4   18.52    8.07
  -5  10  -4   26.72    9.52
  -5  10  -5   45.17   12.80
  -5  10  -5   58.48   11.39
  -5  10  -6  254.31   20.99
  -5  10  -6  287.49   26.83
  -5  10  -7  224.86   20.21
  -5  10  -7  234.32   24.84
  -5  10  -8    8.91    7.03
  -5  10  -8   22.94   10.46
  -5  10  -9   70.65   16.19
  -5  10 -10   75.77   17.69
  -5  10 -11  252.05   29.27
  -5  10 -12   41.12   15.33
  -5  10 -13  149.66   27.03
  -5   9  12   26.30   11.26
  -5   9  11   22.86    9.44
  -5   9  10   76.23   14.85
  -5   9   9   30.09   10.13
  -5   9   9   31.36    9.33
  -5   9   8   12.72    8.45
  -5   9   8    6.55    8.02
  -5   9   7    5.12    7.81
  -5   9   7   -6.99    6.33
  -5   9   6   11.25    6.46
  -5   9   6   27.14   10.05
  -5   9   5    7.51    6.76
  -5   9   5   -4.48    7.34
  -5   9   4   59.39   12.23
  -5   9   4   63.09   12.71
  -5   9   3  931.04   41.56
  -5   9   3 1002.68   44.68
  -5   9   2  284.62   23.34
  -5   9   2  257.79   23.08
  -5   9   1 1455.53   53.93
  -5   9   1 1569.65   53.25
  -5   9   0   69.17   12.21
  -5   9   0   68.33   13.10
  -5   9  -1    8.90    6.89
  -5   9  -1   -0.66    4.88
  -5   9  -2  589.92   34.61
  -5   9  -2  649.75   32.63
  -5   9  -3   72.07   13.09
  -5   9  -3   84.78   12.61
  -5   9  -4  171.07   19.41
  -5   9  -4  196.65   17.58
  -5   9  -5   13.64    7.07
  -5   9  -5   13.68    7.07
  -5   9  -6  208.89   18.29
  -5   9  -6  259.87   23.81
  -5   9  -7    2.01    6.18
  -5   9  -7   13.05    7.97
  -5   9  -8    1.05    6.43
  -5   9  -8   -1.42    4.77
  -5   9  -9  348.49   23.96
  -5   9  -9  407.40   31.92
  -5   9 -10  225.13   25.03
  -5   9 -11  138.19   20.54
  -5   9 -12  506.68   40.13
  -5   9 -13   -5.30   10.58
  -5   9 -14  149.15   25.91
  -5   8  15   76.21   17.45
  -5   8  14  331.69   30.63
  -5   8  13   36.40   13.62
  -5   8  12  449.59   32.83
  -5   8  11   39.91   11.45
  -5   8  10  138.37   17.92
  -5   8   9  224.68   21.74
  -5   8   9  192.63   18.78
  -5   8   8   17.80    8.16
  -5   8   8   29.26    9.05
  -5   8   7   28.39    8.85
  -5   8   7   26.85    9.74
  -5   8   6   14.97    6.61
  -5   8   6   20.86    8.65
  -5   8   5   53.06   11.13
  -5   8   5   43.87   10.16
  -5   8   4  346.47   25.03
  -5   8   4  367.44   25.09
  -5   8   3   61.19   10.64
  -5   8   3   63.62   11.56
  -5   8   2  445.38   28.08
  -5   8   2  403.04   25.82
  -5   8   1  143.75   15.86
  -5   8   1  148.38   15.66
  -5   8   0  428.68   27.59
  -5   8   0  379.41   24.15
  -5   8  -1  457.70   28.55
  -5   8  -1  467.20   26.66
  -5   8  -2   20.38    8.00
  -5   8  -2   18.33    6.77
  -5   8  -3  542.44   30.97
  -5   8  -3  640.92   29.69
  -5   8  -4   50.14   10.33
  -5   8  -4   52.69    9.28
  -5   8  -5   15.25    6.27
  -5   8  -5   20.32    6.98
  -5   8  -6  133.89   16.46
  -5   8  -6  108.96   12.15
  -5   8  -7  190.13   19.65
  -5   8  -7  151.56   14.08
  -5   8  -8    5.29    5.56
  -5   8  -8    1.63    4.58
  -5   8  -9  113.37   16.39
  -5   8  -9   97.34   11.57
  -5   8 -10  159.10   19.70
  -5   8 -10  138.11   14.11
  -5   8 -11  332.45   28.92
  -5   8 -12   -7.49    9.10
  -5   8 -13  476.64   38.37
  -5   8 -14   25.02   12.47
  -5   8 -15   -0.03   11.01
  -5   7  15  285.06   28.17
   5  -7 -15  293.76   29.47
  -5   7  14   59.26   13.69
   5  -7 -14   62.33   15.34
  -5   7  13  531.73   34.88
   5  -7 -13  582.21   38.83
  -5   7  12   -7.37    8.31
   5  -7 -12    2.42    8.28
  -5   7  11  128.44   16.90
  -5   7  10   90.99   13.55
  -5   7  10   99.47   13.02
  -5   7   9   22.07    8.07
  -5   7   9   29.59    8.35
   5  -7  -9   37.13    9.05
  -5   7   8  210.05   17.80
  -5   7   8  191.86   18.85
   5  -7  -8  183.41   17.99
  -5   7   7  359.31   24.69
  -5   7   7  326.04   21.97
   5  -7  -7  331.79   23.43
  -5   7   6   58.35   10.13
  -5   7   6   77.70   11.42
   5  -7  -6   80.61   12.77
  -5   7   5  431.82   25.46
  -5   7   5  410.22   25.64
   5  -7  -5  453.86   27.98
  -5   7   4  101.94   12.92
  -5   7   4  103.61   12.70
  -5   7   3   12.72    5.53
  -5   7   3   11.41    6.27
  -5   7   2   99.47   12.52
  -5   7   2  101.55   12.44
  -5   7   1  446.59   26.48
  -5   7   1  453.69   25.18
  -5   7   0  305.26   21.74
  -5   7   0  305.36   20.35
  -5   7  -1  776.34   34.10
  -5   7  -2  101.89   12.91
  -5   7  -3   59.37    9.92
  -5   7  -4  707.54   33.16
  -5   7  -5  385.74   24.75
  -5   7  -6    6.88    6.15
  -5   7  -7  247.95   20.81
  -5   7  -8  264.15   22.29
  -5   7  -9   31.84    9.07
  -5   7 -10  360.66   27.69
  -5   7 -11   41.76   10.89
  -5   7 -12   63.67   13.51
  -5   7 -13   95.67   17.08
  -5   7 -14  638.27   42.40
  -5   7 -15   10.57   12.56
  -5   7 -17  234.23   33.86
   5  -6 -16   24.01   13.04
  -5   6  15   13.80   10.94
   5  -6 -15   -3.69    9.06
  -5   6  14   57.94   13.90
   5  -6 -14  107.53   18.96
  -5   6  13    7.25    8.82
   5  -6 -13    5.75    7.94
  -5   6  12   -2.96    6.80
   5  -6 -12    3.85    8.59
   5  -6 -11   33.85   10.27
  -5   6  11   38.39    9.49
  -5   6  10  330.68   23.68
  -5   6  10  285.96   18.86
   5  -6 -10  305.43   22.82
   5  -6 -10  329.75   27.19
   5  -6  -9  180.04   19.88
  -5   6   9  147.29   13.75
  -5   6   9  120.55   14.37
   5  -6  -9  140.26   16.05
  -5   6   8  134.32   14.77
  -5   6   8  146.79   13.35
   5  -6  -8  180.34   19.20
   5  -6  -8  142.43   15.78
  -5   6   7  652.19   28.20
   5  -6  -7  653.42   31.82
  -5   6   7  670.98   31.38
  -5   6   6 1616.61   47.77
  -5   6   6 1566.91   44.34
   5  -6  -6 1577.86   49.20
  -5   6   5   44.14    8.20
  -5   6   5   64.66   10.04
   5  -6  -5   77.96   12.61
  -5   6   4  594.79   27.91
  -5   6   4  626.16   28.63
   5  -6  -4  604.01   30.96
  -5   6   3  397.78   22.56
  -5   6   3  360.89   21.51
   5  -6  -3  376.03   24.80
  -5   6   2  130.50   13.97
   5  -6  -2  173.72   17.00
  -5   6   1  283.51   19.23
   5  -6  -1  270.52   22.28
  -5   6   0  284.56   19.03
   5  -6   0  310.15   23.05
  -5   6  -1  132.35   13.10
  -5   6  -2  167.79   14.76
  -5   6  -3   26.25    7.02
  -5   6  -4    5.32    3.28
  -5   6  -5   10.89    4.94
  -5   6  -6  573.86   27.87
  -5   6  -7 1480.72   45.74
  -5   6  -8   89.03   12.24
  -5   6  -9 1556.14   51.20
  -5   6 -10   49.03    9.89
  -5   6 -11  338.72   25.51
  -5   6 -12   40.94   11.10
  -5   6 -13  850.37   43.93
  -5   6 -14   41.24   11.73
  -5   6 -15  322.26   29.81
  -5   6 -17   62.58   21.16
  -5   6 -18  176.04   32.60
   5  -5 -17  256.24   30.29
   5  -5 -16   13.87   11.28
   5  -5 -15   45.67   15.93
   5  -5 -14  145.07   21.18
  -5   5  14  142.29   18.24
  -5   5  13   28.32    8.90
   5  -5 -13   23.38    9.34
  -5   5  12    7.35    6.03
   5  -5 -12   18.51    8.69
  -5   5  11    3.50    5.12
   5  -5 -11   -0.53    6.77
   5  -5 -11    3.56    7.84
  -5   5  10   36.00    7.10
   5  -5 -10   29.96    9.41
  -5   5  10   50.36    9.82
   5  -5 -10   20.82    8.53
  -5   5   9    4.39    5.27
  -5   5   9    1.23    3.29
   5  -5  -9    2.35    6.35
   5  -5  -9    6.46    7.97
  -5   5   8  682.35   30.39
  -5   5   8  689.80   26.51
   5  -5  -8  723.21   37.36
   5  -5  -8  692.01   33.77
  -5   5   7  403.77   20.78
   5  -5  -7  387.94   26.54
   5  -5  -7  403.02   25.35
  -5   5   7  390.88   22.45
   5  -5  -6  713.56   35.27
  -5   5   6  694.85   27.07
   5  -5  -6  670.20   32.49
  -5   5   6  645.02   27.70
  -5   5   5 2106.12   47.35
   5  -5  -5 2032.72   56.51
   5  -5  -5 1966.17   54.36
  -5   5   5 1892.66   46.61
  -5   5   4  159.33   13.27
   5  -5  -4  165.36   16.64
   5  -5  -3  259.79   20.45
  -5   5   3  261.19   16.90
  -5   5   2  745.20   28.33
   5  -5  -2  786.18   34.74
  -5   5   1  167.90   13.55
   5  -5  -1  156.15   15.97
  -5   5   0  194.86   14.55
   5  -5   0  232.41   19.56
  -5   5  -1   91.56   10.13
   5  -5   1   71.01   11.82
  -5   5  -2   69.14    9.25
   5  -5   2   91.14   13.16
  -5   5  -3  147.04   12.65
  -5   5  -4  657.53   27.23
  -5   5  -5  631.59   26.80
  -5   5  -6   -1.39    3.87
  -5   5  -7 2068.38   49.88
  -5   5  -8 1122.81   37.98
  -5   5  -9  467.20   25.53
  -5   5 -10  386.20   24.17
  -5   5 -11  189.78   17.67
  -5   5 -12  572.09   33.08
  -5   5 -13   21.40    9.21
  -5   5 -14   17.21    8.92
  -5   5 -15    2.09    8.93
  -5   5 -16    5.15    8.30
  -5   5 -17   58.10   19.07
  -5   5 -18  -24.81   18.66
  -5   5 -19  127.23   27.46
  -5   5 -20  347.81   47.48
   5  -4 -17   82.20   18.49
   5  -4 -16  370.99   34.19
   5  -4 -15   -6.02    9.39
  -5   4  14  297.33   24.65
   5  -4 -14  284.70   28.12
  -5   4  13    5.33    6.20
   5  -4 -13   84.60   21.61
   5  -4 -12    7.36    7.49
  -5   4  12   28.78    7.99
  -5   4  11   37.31    8.58
   5  -4 -11   49.07   11.69
   5  -4 -11   34.03    9.58
  -5   4  10   62.49    9.54
  -5   4  10   57.82    7.33
   5  -4 -10   63.24   12.32
   5  -4 -10   74.55   13.72
  -5   4   9   16.44    5.60
  -5   4   9   20.55    4.96
   5  -4  -9   10.46    6.78
   5  -4  -9   14.26    8.29
   5  -4  -8   23.32    9.36
  -5   4   8   17.11    4.23
  -5   4   8   15.77    5.61
   5  -4  -8   15.54    7.18
  -5   4   7   40.16    6.34
   5  -4  -7   43.22   10.57
   5  -4  -7   41.32    9.79
  -5   4   7   41.85    8.09
  -5   4   6 2579.74   46.64
   5  -4  -6 2641.62   63.40
   5  -4  -5   24.15    8.72
  -5   4   5   11.37    4.13
   5  -4  -5   12.20    7.53
  -5   4   4 2537.30   47.38
   5  -4  -4 2522.02   62.29
   5  -4  -4 2510.40   61.07
  -5   4   3  734.07   25.98
   5  -4  -3  751.15   31.73
   5  -4  -3  719.19   33.69
   5  -4  -2  959.22   37.56
  -5   4   2  992.50   30.20
  -5   4   1  743.95   26.05
   5  -4  -1  779.86   34.38
  -5   4   0   -0.74    2.90
   5  -4   0    3.57    5.15
  -5   4  -1   87.73    9.06
   5  -4   1   88.22   12.91
  -5   4  -2  807.19   26.82
   5  -4   2  837.93   34.45
  -5   4  -3   12.53    5.00
   5  -4   3   22.95    6.53
  -5   4  -4  479.47   21.18
   5  -4   4  512.09   27.85
  -5   4  -5   16.07    5.18
  -5   4  -6  278.05   16.74
  -5   4  -7   41.58    7.03
  -5   4  -8 1059.32   34.81
  -5   4  -9  921.32   33.37
  -5   4 -10   19.39    6.04
  -5   4 -11  523.80   27.34
  -5   4 -12  591.15   30.23
  -5   4 -13  122.31   15.42
  -5   4 -14  128.93   16.31
  -5   4 -15   42.70   12.21
  -5   4 -16   19.71   10.16
  -5   4 -16   14.63    9.29
  -5   4 -17  169.99   28.21
  -5   4 -18  114.52   24.97
  -5   4 -19   55.02   20.25
  -5   4 -20   -4.86   15.72
   5  -3 -18  168.00   26.25
   5  -3 -17   67.14   18.19
   5  -3 -16   17.75   10.84
   5  -3 -15   51.93   15.40
   5  -3 -14   48.96   12.80
  -5   3  13   51.34    9.99
   5  -3 -13   41.46   11.20
  -5   3  12   69.93   10.91
   5  -3 -12  105.90   17.28
   5  -3 -12  101.35   16.12
   5  -3 -11   10.44    8.67
  -5   3  11    7.08    4.94
   5  -3 -11   13.43    7.61
  -5   3  10  164.17   14.56
  -5   3  10  118.37    9.13
   5  -3 -10  151.81   18.24
   5  -3 -10  144.97   16.66
  -5   3   9 1574.46   32.51
   5  -3  -9 1599.69   51.75
   5  -3  -9 1519.30   54.43
  -5   3   9 1622.97   42.33
  -5   3   8  672.85   21.25
  -5   3   8  632.90   25.53
   5  -3  -8  728.15   34.25
   5  -3  -8  738.68   36.70
  -5   3   7   25.10    4.84
   5  -3  -7   20.89    7.99
   5  -3  -7   34.08    9.69
  -5   3   6   40.74    5.98
   5  -3  -6   44.02    9.20
  -5   3   5  690.75   22.43
   5  -3  -5  688.32   32.02
  -5   3   4   38.98    5.93
   5  -3  -4   24.61    7.51
  -5   3   3 1730.44   36.18
   5  -3  -3 1737.57   48.62
   5  -3  -3 1649.49   48.47
  -5   3   2  795.43   24.29
   5  -3  -2  788.07   33.44
   5  -3  -2  770.49   31.14
  -5   3   1   77.76    7.98
   5  -3  -1   87.51   10.10
   5  -3  -1   86.98   12.94
  -5   3   0  887.61   26.05
   5  -3   0  904.03   36.86
   5  -3   1   65.43   10.26
  -5   3  -1   73.62    8.01
   5  -3   2  147.47   14.93
  -5   3  -2  153.78   10.76
   5  -3   3  189.48   16.49
  -5   3  -3  117.82    9.74
  -5   3  -4  871.55   26.04
   5  -3   4  898.96   34.60
  -5   3  -5  533.06   20.54
   5  -3   5  484.55   26.04
  -5   3  -6   10.28    3.57
   5  -3   6    9.73    6.34
  -5   3  -7  425.02   19.57
  -5   3  -8   92.25    9.88
  -5   3  -9  528.90   23.35
  -5   3 -10  994.23   33.32
  -5   3 -11  158.72   14.30
  -5   3 -12 2443.69   57.89
  -5   3 -13   23.25    7.57
  -5   3 -14   -1.79    5.14
  -5   3 -15  120.67   15.73
  -5   3 -16  292.63   24.66
  -5   3 -16  327.78   34.19
  -5   3 -17   14.90   11.56
  -5   3 -18  171.38   26.28
  -5   3 -19   -6.72   13.98
  -5   3 -20  -10.72   12.53
  -5   3 -21   14.22   16.10
   5  -2 -18   16.01   14.17
   5  -2 -17  234.11   28.02
   5  -2 -16   47.59   15.13
   5  -2 -15   21.91   11.06
   5  -2 -14  136.87   20.70
  -5   2  13   76.26   11.17
   5  -2 -13   43.44   11.66
   5  -2 -13   69.20   14.91
  -5   2  12  154.28   14.59
   5  -2 -12  149.66   18.36
  -5   2  11  174.56   14.67
   5  -2 -11  155.21   17.97
  -5   2  10 1639.12   41.98
  -5   2  10 1403.88   26.82
   5  -2 -10 1488.13   54.92
   5  -2 -10 1575.09   52.57
  -5   2   9  498.93   16.14
   5  -2  -9  498.86   31.27
   5  -2  -9  515.43   29.53
  -5   2   9  496.52   22.11
  -5   2   8  407.10   15.31
   5  -2  -8  328.62   25.03
   5  -2  -8  357.95   24.51
   5  -2  -7  300.65   23.23
   5  -2  -7  322.28   22.41
  -5   2   7  321.80   13.79
  -5   2   6  524.33   17.66
   5  -2  -6  518.29   29.31
   5  -2  -6  516.65   27.57
   5  -2  -5  440.41   25.11
   5  -2  -5  393.37   24.74
  -5   2   5  441.84   16.42
   5  -2  -4  543.59   27.47
   5  -2  -4  516.99   27.05
   5  -2  -3  428.50   24.70
   5  -2  -3  395.55   23.12
   5  -2  -2  774.37   30.87
   5  -2  -2  782.01   32.32
   5  -2  -1  663.92   27.35
   5  -2  -1  695.88   30.67
   5  -2   0   95.53   10.23
   5  -2   0   88.66   11.49
   5  -2   1 1758.12   48.53
   5  -2   2  331.88   21.32
   5  -2   3  656.96   29.72
   5  -2   4 2869.29   60.79
   5  -2   5 2491.65   56.49
   5  -2   6   72.28   10.11
   5  -2   7   88.36   11.29
  -5   2  -9 1548.01   36.61
  -5   2 -10  906.80   29.35
  -5   2 -11 3801.87   62.83
  -5   2 -12  176.03   14.63
  -5   2 -13   -4.63    4.59
  -5   2 -14  179.49   16.59
  -5   2 -15  261.37   20.17
  -5   2 -15  274.67   26.71
  -5   2 -16  321.97   29.59
  -5   2 -16  299.85   22.62
  -5   2 -17  502.28   36.74
  -5   2 -18   10.50    8.47
  -5   2 -19  261.42   28.27
  -5   2 -20    7.03   12.19
   5  -1 -18   34.14   15.19
   5  -1 -17   40.61   13.21
   5  -1 -16   21.77   10.68
   5  -1 -15   -3.84    8.19
   5  -1 -14   12.12    8.95
   5  -1 -14   -8.30    9.74
   5  -1 -13   17.30   10.02
   5  -1 -13    9.46    7.64
   5  -1 -12  255.79   22.34
  -5   1  12  277.81   17.72
   5  -1 -11   37.92   10.55
   5  -1 -11   44.35   10.24
  -5   1  11   54.59    7.98
  -5   1  10  202.11    8.92
   5  -1 -10  193.84   20.20
   5  -1 -10  188.69   18.13
  -5   1   9  577.03   15.71
   5  -1  -9  533.44   31.32
   5  -1  -9  539.28   29.18
   5  -1  -8   24.05    8.01
  -5   1   8   23.54    3.60
   5  -1  -7  534.86   29.93
   5  -1  -7  503.06   26.60
   5  -1  -6  406.04   25.88
   5  -1  -6  366.50   22.68
   5  -1  -5  356.14   23.11
   5  -1  -5  348.20   22.16
   5  -1  -4    2.61    4.87
   5  -1  -4    9.32    6.13
   5  -1  -3   45.92    8.68
   5  -1  -3   58.84    9.97
   5  -1  -2  309.10   20.09
   5  -1  -2  272.26   18.26
   5  -1  -1  105.58   11.97
   5  -1  -1   80.30    9.83
   5  -1   0  307.57   17.82
   5  -1   0  272.12   19.17
   5  -1   1   95.24   11.55
   5  -1   1  107.38   10.00
   5  -1   2  677.34   28.56
   5  -1   3 1488.03   42.65
   5  -1   4  145.01   14.15
   5  -1   5 1755.46   46.04
   5  -1   6  599.90   26.81
   5  -1   7  158.05   13.85
   5  -1   8 3709.79   66.71
  -5   1 -13  656.55   26.99
  -5   1 -14  441.88   23.72
  -5   1 -15  227.47   21.61
  -5   1 -15  256.48   18.98
  -5   1 -16   99.35   14.17
  -5   1 -16  143.44   15.15
  -5   1 -17  111.96   16.22
  -5   1 -18  664.40   38.78
  -5   1 -19  158.18   21.10
   5   0 -17    7.74    9.33
   5   0 -16   18.41   10.80
   5   0 -15   16.94    9.70
   5   0 -14   24.19    8.44
   5   0 -14   47.04   12.02
   5   0 -13   10.02    6.45
   5   0 -13   -0.16    6.49
   5   0 -12   11.66    7.48
   5   0 -12   -3.67    6.98
   5   0 -11   64.05   11.45
  -5   0  11   60.95    8.21
   5   0 -11   54.23   12.33
   5   0 -10  317.59   22.00
  -5   0  10  298.71    9.73
   5   0 -10  287.74   23.77
   5   0  -9 1011.25   37.76
   5   0  -9  965.38   41.72
   5   0  -8  591.48   31.34
   5   0  -8  522.92   26.76
   5   0  -7   31.20    7.96
   5   0  -7   32.20    8.72
   5   0  -6 1310.68   43.79
   5   0  -6 1272.09   39.82
   5   0  -5 1166.55   40.06
   5   0  -5 1171.37   38.04
   5   0  -4  887.63   34.59
   5   0  -4  923.77   33.64
   5   0  -3  115.04   12.16
   5   0  -3  123.41   12.85
   5   0  -2 1142.68   36.55
   5   0  -2 1138.04   36.46
   5   0  -1  907.21   32.59
   5   0  -1  803.92   29.25
   5   0   0    2.22    3.27
   5   0   0    2.44    3.55
   5   0   1    9.78    3.72
   5   0   1   17.66    5.86
  -5   0  -2  448.03   20.72
   5   0   2  425.25   17.99
   5   0   2  429.62   22.46
   5   0   3   25.19    6.49
  -5   0  -3   18.32    5.52
   5   0   4 2065.31   47.29
  -5   0  -4 2059.29   40.25
  -5   0  -5  271.88   15.05
   5   0   5  267.68   17.58
   5   0   6  756.56   29.14
  -5   0  -6  744.91   23.62
   5   0   7 2037.55   47.17
   5   0   8  223.02   15.99
   5   0   9   -1.93    4.54
  -5   0 -14  334.61   22.19
  -5   0 -15  127.47   14.41
  -5   0 -15  131.51   13.29
  -5   0 -16  167.98   14.89
  -5   0 -16  118.58   13.83
  -5   0 -17  560.55   30.43
  -5   0 -18   12.60    7.72
   5   1 -17  130.44   21.98
   5   1 -16   98.40   18.67
   5   1 -15   57.93   12.12
   5   1 -15   78.63   15.50
   5   1 -14    2.03    6.82
   5   1 -14   -1.74    5.80
   5   1 -13  597.33   32.07
   5   1 -13  610.78   37.82
   5   1 -12    5.93    6.45
   5   1 -12    9.28    6.38
   5   1 -11  690.71   32.50
   5   1 -11  679.99   36.50
   5   1 -10  368.76   22.90
   5   1 -10  322.94   24.38
   5   1  -9   20.70    6.92
   5   1  -9   17.68    5.86
   5   1  -8    4.07    5.08
   5   1  -8    7.25    5.92
  -5  -1   8    1.14    4.49
   5   1  -7 1271.03   39.26
   5   1  -7 1381.70   44.75
   5   1  -6  382.04   21.11
   5   1  -6  400.94   23.74
   5   1  -5 1142.17   35.87
   5   1  -5 1288.07   41.12
   5   1  -4 1416.05   39.35
   5   1  -4 1433.40   43.23
   5   1  -3   42.14    7.37
   5   1  -3   31.86    6.59
   5   1  -2  207.83   15.39
   5   1  -2  217.47   15.58
   5   1  -1 1527.23   39.64
   5   1  -1 1503.27   40.26
   5   1   0  707.33   25.81
   5   1   0  691.71   27.49
   5   1   1  212.15   15.38
   5   1   1  268.33   14.92
  -5  -1  -1  251.82   15.72
  -5  -1  -2   -0.75    4.11
   5   1   2    4.71    4.24
   5   1   2    4.81    3.56
  -5  -1  -3  858.06   25.39
   5   1   3  897.73   23.93
   5   1   3  879.09   30.98
  -5  -1  -4  408.26   17.27
   5   1   4  360.32   19.50
   5   1   5 1936.56   44.05
  -5  -1  -5 1897.01   34.81
  -5  -1  -6 2113.74   35.98
   5   1   6 2090.15   45.03
  -5  -1  -7  966.00   24.08
   5   1   7 1001.15   31.40
   5   1   8 2047.57   45.09
   5   1   9  177.18   14.00
   5   1  10  210.75   15.97
  -5  -1 -13   94.37   10.74
  -5  -1 -14   35.42    7.48
  -5  -1 -15   71.67   10.37
  -5  -1 -16  157.37   14.49
  -5  -1 -17  212.77   17.53
   5   2 -17   11.85    9.42
   5   2 -16   55.99   14.75
   5   2 -16   42.18   11.97
   5   2 -15  183.46   20.46
   5   2 -15  195.49   24.30
   5   2 -14  211.14   19.92
   5   2 -14  251.20   26.22
   5   2 -13  125.86   15.88
   5   2 -13  121.87   18.24
   5   2 -12  153.96   16.03
   5   2 -12  149.15   18.58
   5   2 -11    2.13    5.01
   5   2 -11    7.78    5.31
  -5  -2  10   24.79    4.19
   5   2 -10   21.03    7.66
   5   2 -10   20.56    7.08
   5   2  -9    4.30    4.41
   5   2  -9    3.74    4.49
   5   2  -8  565.93   26.76
   5   2  -8  587.84   30.66
   5   2  -7   12.11    5.56
  -5  -2   7    3.27    6.51
   5   2  -7   24.39    6.18
   5   2  -6  891.48   31.86
   5   2  -6  814.85   33.17
   5   2  -5   41.21    7.84
   5   2  -5   38.14    8.09
  -5  -2   4    0.11    6.12
   5   2  -4    5.51    4.21
   5   2  -4    8.78    4.46
  -5  -2   3  574.27   30.43
   5   2  -3  596.08   24.73
   5   2  -3  627.65   26.38
   5   2  -2 1029.16   31.88
   5   2  -2 1050.37   32.84
   5   2  -1  230.70   15.47
   5   2  -1  244.10   15.97
  -5  -2   0  376.69   19.43
   5   2   0  368.24   18.19
   5   2   0  368.09   19.12
   5   2   1 1153.04   30.38
  -5  -2  -1 1098.45   30.68
   5   2   1 1073.53   32.46
   5   2   2  194.92   11.92
   5   2   2  198.02   14.45
  -5  -2  -2  197.67   12.52
   5   2   3  225.00   15.32
  -5  -2  -3  227.28   12.92
   5   2   3  226.99   11.84
   5   2   4  855.42   36.51
   5   2   4  910.41   30.04
   5   2   4  925.38   22.31
  -5  -2  -4  868.82   22.87
  -5  -2  -5  499.25   16.96
   5   2   5  509.33   28.82
   5   2   5  455.78   21.24
  -5  -2  -6  635.63   18.10
   5   2   6  602.40   31.44
  -5  -2  -6  587.72   22.57
   5   2   6  583.79   23.15
   5   2   7  875.21   38.22
  -5  -2  -7  780.76   25.78
  -5  -2  -7  837.17   19.52
   5   2   7  796.01   26.43
  -5  -2  -8  335.48   12.62
   5   2   8  326.00   23.74
  -5  -2  -8  291.88   16.94
   5   2   8  316.27   17.26
  -5  -2  -9  344.26   12.69
  -5  -2  -9  302.17   16.92
   5   2   9  315.55   17.43
   5   2  10  201.83   19.63
  -5  -2 -10  227.15   14.61
   5   2  10  235.26   15.66
  -5  -2 -11   12.82    4.39
   5   2  11   11.41    6.85
  -5  -2 -11   13.98    6.83
   5   2  11   10.39    6.74
  -5  -2 -12  700.40   21.47
  -5  -2 -12  703.72   25.58
  -5  -2 -13  264.06   14.17
   5   2  13  282.43   24.64
   5   2  14   14.34    8.31
  -5  -2 -14    2.53    4.14
  -5  -2 -15 1041.89   31.54
   5   2  15 1007.86   48.30
   5   2  16   14.94    9.15
  -5  -2 -16   11.00    6.71
   5   3 -16   61.07   15.66
   5   3 -16   52.82   12.44
   5   3 -15    1.05    8.64
   5   3 -15   12.27    7.03
   5   3 -14  506.94   31.26
   5   3 -14  416.71   33.61
   5   3 -13  113.41   15.01
   5   3 -13  108.11   17.30
   5   3 -12    8.99    5.86
   5   3 -12    0.57    7.15
   5   3 -11  516.76   28.33
   5   3 -11  591.29   34.90
   5   3 -10   -4.03    5.42
   5   3 -10    2.59    4.00
   5   3  -9  413.05   23.53
   5   3  -9  441.22   27.56
   5   3  -8   13.01    5.65
   5   3  -8    6.87    4.41
   5   3  -7   33.20    8.11
  -5  -3   7   22.90    7.50
   5   3  -7   44.80    8.02
   5   3  -6   -1.29    4.41
  -5  -3   6    0.78    6.31
   5   3  -6   -1.09    4.02
   5   3  -5   13.84    5.29
  -5  -3   5   12.74    7.15
   5   3  -5   25.91    6.28
  -5  -3   4  463.16   27.40
   5   3  -4  435.69   21.28
   5   3  -4  451.10   22.78
   5   3  -3   20.24    5.29
  -5  -3   3   31.03    8.62
   5   3  -3   23.46    5.20
   5   3  -2  972.97   30.58
   5   3  -2  952.94   30.52
   5   3  -1 2248.39   46.03
   5   3  -1 2183.05   44.55
   5   3   0  283.02   16.52
   5   3   0  309.67   16.27
   5   3   1 3460.58   70.18
   5   3   1 3560.84   56.55
   5   3   1 3627.88   53.43
   5   3   2 1546.71   32.25
   5   3   2 1580.93   48.23
  -5  -3  -2 1634.50   33.41
  -5  -3  -3 1543.89   30.45
   5   3   3 1468.74   46.88
   5   3   3 1444.30   29.45
   5   3   3 1411.34   36.04
   5   3   4  821.81   35.96
  -5  -3  -4  849.56   20.61
   5   3   4  808.83   27.58
   5   3   4  814.01   19.72
   5   3   5  793.04   35.36
  -5  -3  -5  874.70   18.75
  -5  -3  -5  728.28   24.66
   5   3   5  910.89   29.03
   5   3   6  855.81   36.21
  -5  -3  -6  841.63   16.48
   5   3   6  902.12   28.60
   5   3   7    5.72    4.92
  -5  -3  -7    7.01    4.43
  -5  -3  -7   20.29    2.86
   5   3   7   14.89    4.31
   5   3   8  358.47   24.99
  -5  -3  -8  348.65   16.51
   5   3   8  379.36   17.77
  -5  -3  -8  383.56    9.67
  -5  -3  -9   -0.91    1.43
  -5  -3  -9    6.85    2.09
  -5  -3  -9    3.16    4.99
   5   3   9    5.27    3.76
  -5  -3 -10  348.75    9.99
   5   3  10  426.97   28.38
  -5  -3 -10  372.86   16.98
   5   3  10  463.18   20.93
  -5  -3 -11  249.93    9.99
   5   3  11  280.09   23.46
  -5  -3 -11  232.67   13.43
   5   3  12  300.76   25.30
  -5  -3 -12  342.28   12.88
   5   3  13   75.43   13.69
  -5  -3 -13   87.21    7.74
   5   3  14  982.50   45.72
  -5  -3 -14 1073.82   27.82
   5   3  15  200.34   22.22
   5   3  16  108.84   17.07
   5   3  17   56.64   14.71
   5   3  18   59.48   16.08
   5   3  19   -2.63    9.45
   5   4 -16   -5.48   11.80
   5   4 -16   10.38    8.04
   5   4 -15  112.55   16.74
   5   4 -15  135.23   21.25
   5   4 -14   71.30   15.84
   5   4 -14   80.58   14.48
   5   4 -13  323.71   24.81
   5   4 -13  285.73   27.31
   5   4 -12  484.94   29.47
   5   4 -12  485.57   33.85
   5   4 -11   82.83   12.79
   5   4 -11   76.51   13.04
   5   4 -10  346.54   23.36
   5   4 -10  362.40   26.45
   5   4  -9    6.44    5.11
   5   4  -9    1.27    4.42
   5   4  -8  149.23   15.13
   5   4  -8  109.62   13.38
   5   4  -7   18.05    6.08
   5   4  -7    9.96    4.97
  -5  -4   6  622.31   25.86
   5   4  -6  606.22   29.22
   5   4  -5   19.78    5.79
  -5  -4   5   32.62    7.46
   5   4  -5   33.16    6.94
  -5  -4   4  241.45   18.62
   5   4  -4  274.71   17.49
   5   4  -4  250.11   17.25
   5   4  -3    6.26    4.13
   5   4  -3    9.58    4.88
   5   4  -2  847.55   28.87
   5   4  -2  733.48   26.58
   5   4  -1  466.46   25.78
   5   4  -1  408.61   19.75
   5   4  -1  400.07   18.64
   5   4   0 3073.27   52.47
   5   4   0 2997.13   48.90
   5   4   1    4.36    2.55
  -5  -4  -1    3.44    3.87
   5   4   1    9.64    6.28
   5   4   1    5.90    3.14
  -5  -4  -2  684.36   21.92
   5   4   2  705.24   32.27
   5   4   2  638.78   23.99
   5   4   2  622.81   20.52
  -5  -4  -3  982.09   24.18
   5   4   3 1025.64   39.58
   5   4   3 1067.41   30.52
   5   4   3 1072.02   25.07
  -5  -4  -4    4.30    3.23
   5   4   4    5.11    2.42
   5   4   4    2.71    6.07
   5   4   4    3.11    3.37
   5   4   5  713.72   15.59
   5   4   5  786.20   34.52
   5   4   5  773.04   26.38
   5   4   6  181.06   16.88
   5   4   6  181.86   13.02
   5   4   7   19.87    7.42
   5   4   7   29.93    6.11
  -5  -4  -8   18.42    4.98
   5   4   8   15.30    4.93
  -5  -4  -9  123.11    9.25
   5   4   9  157.90   11.57
   5   4  10   53.89   11.40
  -5  -4 -10   26.01    5.32
   5   4  10   51.42    7.52
   5   4  11    4.53    6.74
  -5  -4 -11   -1.33    4.71
   5   4  11    0.46    4.50
   5   4  12 1446.00   52.55
   5   4  13  814.98   40.84
   5   4  14  823.69   42.48
   5   4  15  887.24   45.31
   5   4  16   18.47    8.97
   5   4  17  424.76   33.75
   5   4  18  -13.07   11.79
   5   4  19   53.53   14.51
   5   5 -16   -0.38    8.61
   5   5 -15   13.10   12.32
   5   5 -15   12.56    8.71
   5   5 -14  150.60   18.81
   5   5 -14  188.58   24.30
   5   5 -13   67.13   13.05
   5   5 -13   89.30   16.99
   5   5 -12  256.52   25.50
   5   5 -12  214.52   20.81
   5   5 -11  401.41   27.56
   5   5 -11  398.52   30.17
   5   5 -10   13.62    7.06
   5   5 -10   13.48    6.93
   5   5  -9  720.50   33.61
   5   5  -9  735.02   37.41
   5   5  -8   49.64    9.40
   5   5  -8   42.51    9.93
   5   5  -7   12.48    5.47
   5   5  -7   -6.53    5.45
   5   5  -6   15.19    6.41
   5   5  -6   17.13    6.49
  -5  -5   5   51.57    8.99
   5   5  -5   39.61    7.51
   5   5  -5   24.79    7.86
   5   5  -4   64.25    9.23
   5   5  -4   53.55    8.65
   5   5  -3    4.98    3.80
   5   5  -3    6.15    3.81
   5   5  -2  314.94   18.61
   5   5  -2  324.14   18.22
   5   5  -1  389.18   24.44
   5   5  -1  357.61   19.09
   5   5   0   16.16    6.52
   5   5   0    4.53    3.87
   5   5   0    8.06    3.56
   5   5   1 2112.42   44.47
   5   5   1 2081.22   39.15
   5   5   2  442.80   19.83
   5   5   2  390.94   15.84
   5   5   3  917.92   37.95
   5   5   3  818.74   26.74
   5   5   3  853.11   22.05
   5   5   4  460.17   27.11
   5   5   4  433.04   19.42
   5   5   4  411.91   13.91
   5   5   5    8.93    2.18
   5   5   5   14.79    7.48
   5   5   5    6.04    3.55
   5   5   6  359.02   17.83
   5   5   6  394.38   25.99
   5   5   7  524.53   21.36
   5   5   7  477.91   28.74
   5   5   8   28.05    9.03
   5   5   8   31.52    5.95
   5   5   9  259.10   22.33
   5   5   9  286.83   15.21
   5   5  10  146.25   10.71
   5   5  10  115.15   15.06
   5   5  11  260.90   23.15
   5   5  11  271.77   14.89
   5   5  12   -2.48    5.94
   5   5  13  322.43   27.62
   5   5  14  420.45   31.66
   5   5  15  151.98   20.04
   5   5  16  193.48   23.42
   5   5  17   -1.58    8.64
   5   5  18   -2.56    8.35
   5   5  19   24.36   13.15
   5   5  20  126.97   22.63
   5   6 -16   50.92   14.54
   5   6 -15  154.49   20.71
   5   6 -14   29.39   11.26
   5   6 -14   42.00   12.06
   5   6 -13  147.85   19.02
   5   6 -13  117.60   19.37
   5   6 -12  128.88   17.03
   5   6 -12  115.01   17.66
   5   6 -11   39.39    9.20
   5   6 -11   54.19   13.13
   5   6 -10  186.27   18.77
   5   6 -10  192.51   20.81
   5   6  -9    4.92    4.81
   5   6  -9    1.67    6.26
   5   6  -8   84.27   13.49
   5   6  -8   75.62   12.07
   5   6  -7  207.96   19.56
   5   6  -7  249.53   19.71
   5   6  -6   91.77   12.62
   5   6  -6   91.46   12.36
   5   6  -5 1074.55   39.75
   5   6  -5 1098.50   38.80
   5   6  -4  549.22   27.32
   5   6  -4  521.41   26.11
   5   6  -3   43.10    8.16
   5   6  -3   58.03   11.43
   5   6  -3   44.11    8.09
   5   6  -2  127.47   15.00
   5   6  -2  105.59   11.18
   5   6  -2   90.71   10.49
   5   6  -1  497.75   29.05
   5   6  -1  443.08   21.87
   5   6  -1  447.06   21.55
   5   6   0  495.81   28.56
   5   6   0  469.64   20.54
   5   6   0  465.38   21.73
   5   6   1   74.13   12.30
   5   6   1   60.64    7.41
   5   6   1   65.50    8.67
   5   6   2  719.12   22.19
   5   6   2  791.63   27.70
   5   6   3  357.48   18.34
   5   6   3  354.35   14.62
   5   6   4  674.56   33.17
   5   6   4  596.20   23.01
   5   6   4  598.22   17.00
   5   6   5  255.15   21.20
   5   6   5  240.30   14.64
   5   6   5  213.83    9.00
   5   6   6   17.79    8.17
   5   6   6   22.65    5.12
   5   6   7   15.65    8.23
   5   6   7   11.95    4.24
   5   6   8 1833.53   57.64
   5   6   8 1854.88   39.84
   5   6   9   -3.17    8.10
   5   6   9   16.65    5.17
   5   6  10  804.40   39.91
   5   6  10  811.98   24.84
   5   6  11  500.29   32.30
   5   6  11  479.68   18.92
   5   6  12  329.84   26.81
   5   6  13  316.23   26.73
   5   6  14  214.63   23.91
   5   6  15  542.95   37.20
   5   6  16   41.33   14.36
   5   6  17  330.44   32.07
   5   6  18  136.24   22.20
   5   6  19   59.55   15.46
   5   6  20  460.66   40.84
   5   7 -14   17.32    9.96
   5   7 -13   25.69   11.09
   5   7 -13   28.43   12.80
   5   7 -12   38.00   10.56
   5   7 -12   39.10   13.21
   5   7 -11    7.97    6.91
   5   7 -11   26.43    9.50
   5   7 -10   24.00    8.44
   5   7 -10   21.18    9.14
   5   7  -9  196.51   21.24
   5   7  -9  179.76   19.17
   5   7  -8   47.57   10.16
   5   7  -8   34.95   10.46
   5   7  -7   17.95    7.06
   5   7  -7   41.74    9.67
   5   7  -6  799.79   37.94
   5   7  -6  825.70   37.30
   5   7  -5  830.34   37.03
   5   7  -5  810.08   35.73
   5   7  -5  812.81   41.32
   5   7  -4  315.14   21.85
   5   7  -4  379.85   25.68
   5   7  -4  315.79   26.27
   5   7  -3 2711.97   67.81
   5   7  -3 2561.98   72.23
   5   7  -2    5.72    7.72
   5   7  -2   10.94    5.75
   5   7  -2    6.96    5.27
   5   7  -1  926.69   40.14
   5   7  -1  872.36   31.36
   5   7  -1  859.92   33.19
   5   7   0   16.37    8.56
   5   7   0   33.35    7.41
   5   7   0   15.50    4.86
   5   7   0    8.91    7.59
   5   7   1  361.70   26.31
   5   7   1  297.99   16.79
   5   7   1  313.21   18.49
   5   7   1  362.38   27.29
   5   7   2   60.62    7.39
   5   7   2   65.15   11.88
   5   7   2   63.60    9.08
   5   7   2   70.76   12.96
   5   7   3  714.82   35.53
   5   7   3  622.15   20.96
   5   7   3  606.42   24.64
   5   7   3  699.97   37.66
   5   7   4  100.18   14.11
   5   7   4   87.85    7.37
   5   7   4   83.65    9.49
   5   7   4  107.67   16.08
   5   7   5  158.49   18.07
   5   7   5  152.44   12.08
   5   7   5  137.84    7.98
   5   7   6  248.96   22.93
   5   7   6  219.50   14.27
   5   7   7  647.89   36.67
   5   7   7  520.99   21.92
   5   7   8   38.34   10.30
   5   7   8   36.11    6.39
   5   7   9 3168.74   84.15
   5   7   9 3267.67   53.48
   5   7  10 1828.55   64.86
   5   7  10 1843.12   39.27
   5   7  11  121.90   17.81
   5   7  12  921.35   46.63
   5   7  13   46.66   11.82
   5   7  14  115.04   18.17
   5   7  15   33.11   11.76
   5   7  16  423.31   34.74
   5   7  17   31.72   13.65
   5   7  18  112.13   21.76
   5   7  19   24.02   12.73
   5   7  20    1.66   12.66
   5   7  21    9.23   14.68
   5   8 -13   -0.64    7.42
   5   8 -12   42.71   12.33
   5   8 -12   29.84   13.21
   5   8 -11    7.35    7.10
   5   8 -11    7.68    8.13
   5   8 -10    3.62    7.82
   5   8 -10   -4.99    7.57
   5   8  -9   28.98   10.94
   5   8  -9   20.69    9.34
   5   8  -8   89.62   15.32
   5   8  -8  102.05   15.65
   5   8  -7   -2.11    6.13
   5   8  -7   -0.57    6.94
   5   8  -6  103.79   14.62
   5   8  -6  114.12   17.94
   5   8  -5  817.98   38.42
   5   8  -5  881.25   41.10
   5   8  -5  837.55   45.48
   5   8  -4  575.47   31.01
   5   8  -4  654.04   35.79
   5   8  -4  682.20   41.27
   5   8  -3  230.51   19.14
   5   8  -3  251.57   22.85
   5   8  -3  287.00   27.60
   5   8  -2  665.68   30.62
   5   8  -2  695.39   36.98
   5   8  -2  745.28   43.18
   5   8  -1   84.46   11.03
   5   8  -1   86.50   14.44
   5   8   0    8.51    7.59
   5   8   0    9.74    4.01
   5   8   0    9.73    7.31
   5   8   1    3.52    5.97
   5   8   1    5.07    4.16
   5   8   1    8.84    4.13
   5   8   1   19.74    9.47
   5   8   2  130.34   16.95
   5   8   2  125.40   11.21
   5   8   2  126.06   12.50
   5   8   2  147.81   19.00
   5   8   3  141.47   17.84
   5   8   3  134.16   10.50
   5   8   3  119.02   11.26
   5   8   3  171.50   20.55
   5   8   4  387.06   29.80
   5   8   4  278.44   14.04
   5   8   4  245.69   15.80
   5   8   4  364.28   29.52
   5   8   5  224.35   11.22
   5   8   5  238.88   15.91
   5   8   6   34.88    6.51
   5   8   6   13.05    2.81
   5   8   6   31.18   11.10
   5   8   6   38.10   10.42
   5   8   7  435.16   32.91
   5   8   7  329.73   17.97
   5   8   8  664.40   41.68
   5   8   8  571.49   23.34
   5   8   9   -2.70    8.01
   5   8   9    5.37    4.85
   5   8  10  742.78   44.78
   5   8  10  695.65   25.67
   5   8  11  168.68   22.36
   5   8  12  256.28   27.49
   5   8  13  281.18   28.55
   5   8  14    1.30    8.31
   5   8  15   67.40   16.44
   5   8  16    9.13    8.64
   5   8  17   42.45   14.19
   5   8  18    4.51   11.61
   5   8  19    3.01   10.99
   5   8  20    6.87   13.48
   5   9 -11   -1.30    7.66
   5   9 -11   11.34    9.53
   5   9 -10   20.47   10.33
   5   9 -10   12.54   10.73
   5   9  -9   40.47   11.38
   5   9  -9   76.99   15.98
   5   9  -8   50.15   13.26
   5   9  -8   35.05   12.41
   5   9  -7   18.54   10.13
   5   9  -7   -7.78    8.54
   5   9  -6   19.80    7.78
   5   9  -6   27.40   11.91
   5   9  -5   25.12    8.21
   5   9  -5   52.87   14.03
   5   9  -4  323.61   26.82
   5   9  -4  280.51   22.79
   5   9  -4  273.43   27.87
   5   9  -3  642.30   33.32
   5   9  -3  690.13   38.89
   5   9  -3  626.58   41.95
   5   9  -2    0.63    8.17
   5   9  -2   12.78    5.58
   5   9  -2    8.44    8.59
   5   9  -1 1966.99   52.17
   5   9  -1 2092.03   68.21
   5   9  -1 2079.33   73.42
   5   9   0   27.49    9.38
   5   9   0   22.69    6.48
   5   9   0   28.20    9.97
   5   9   1  203.38   15.34
   5   9   1  226.60   22.32
   5   9   1  186.40   22.04
   5   9   2  316.06   18.42
   5   9   2  353.98   29.04
   5   9   2  326.89   21.18
   5   9   2  313.44   29.21
   5   9   3  176.41   13.00
   5   9   3  216.07   23.12
   5   9   3  165.07   14.39
   5   9   3  172.69   21.95
   5   9   4  313.04   16.17
   5   9   4  392.15   31.94
   5   9   4  319.08   18.93
   5   9   4  397.71   32.22
   5   9   5   24.61   11.20
   5   9   5   14.45    5.42
   5   9   5   16.79    3.90
   5   9   5   21.05    9.32
   5   9   6   28.56   11.84
   5   9   6   30.75    6.66
   5   9   6   43.16   11.54
   5   9   7   36.79   11.70
   5   9   7   45.51    7.53
   5   9   7   58.56   13.59
   5   9   8   13.92    8.36
   5   9   8   17.81    5.13
   5   9   8    9.35    6.88
   5   9   9 1090.88   56.24
   5   9   9  881.16   30.08
   5   9  10   90.41   18.09
   5   9  11 1841.06   75.94
   5   9  12  556.57   42.31
   5   9  13   -0.63    9.01
   5   9  14   74.22   18.85
   5   9  15   19.27   12.36
   5   9  16    5.47    9.15
   5   9  17  194.00   26.32
   5   9  18   35.83   15.80
   5   9  19    9.66   12.15
   5  10 -10    3.72    8.66
   5  10  -9   52.76   15.72
   5  10  -8   36.97   12.74
   5  10  -8   27.03   11.54
   5  10  -7   14.10   10.74
   5  10  -7   39.42   16.25
   5  10  -6  120.71   17.44
   5  10  -6  144.74   23.67
   5  10  -5   12.19    8.12
   5  10  -5   17.91   12.69
   5  10  -4   58.97   12.65
   5  10  -4  106.59   19.23
   5  10  -3   78.65   12.82
   5  10  -3   56.34   14.14
   5  10  -3   99.78   18.97
   5  10  -2  496.04   29.04
   5  10  -2  572.85   38.62
   5  10  -2  564.50   41.40
   5  10  -1    5.96    8.99
   5  10  -1   -0.80    4.67
   5  10  -1   -3.69    8.39
   5  10   0  199.74   17.32
   5  10   0  223.76   23.84
   5  10   0  229.89   27.13
   5  10   1  276.96   19.66
   5  10   1  237.74   25.05
   5  10   1  257.25   28.01
   5  10   2   49.24    8.93
   5  10   2   67.33   15.86
   5  10   3  178.36   14.25
   5  10   3  211.15   17.11
   5  10   3  238.79   27.46
   5  10   4  102.53   10.70
   5  10   4   93.35   18.23
   5  10   4   96.63   11.58
   5  10   4  134.67   20.81
   5  10   5   10.97    7.79
   5  10   5   23.35   12.92
   5  10   5    5.40    8.10
   5  10   6  100.76   11.63
   5  10   6  128.08   20.47
   5  10   7  234.35   16.27
   5  10   7  284.90   29.26
   5  10   7  315.77   31.86
   5  10   8  276.53   17.50
   5  10   8  347.75   31.76
   5  10   9   13.65   12.15
   5  10  10  917.70   54.47
   5  10  11   62.99   15.82
   5  10  12  361.86   37.12
   5  10  13 1061.66   63.46
   5  10  14   -3.61   12.04
   5  10  15   96.50   21.77
   5  10  16  181.39   27.53
   5  10  17   39.49   15.58
   5  11  -8  154.03   23.53
   5  11  -8  201.03   29.70
   5  11  -7  318.52   30.72
   5  11  -7  419.28   41.17
   5  11  -6    6.85    7.30
   5  11  -6   44.71   15.80
   5  11  -5  127.34   18.20
   5  11  -5  142.81   25.71
   5  11  -4   53.96   12.39
   5  11  -4   87.46   18.65
   5  11  -3   42.31   10.53
   5  11  -3   51.69   14.94
   5  11  -2  112.97   15.57
   5  11  -2  113.45   20.35
   5  11  -2  120.45   22.30
   5  11  -1  167.84   18.01
   5  11  -1  206.96   25.20
   5  11  -1  169.23   24.95
   5  11   0   35.43   11.53
   5  11   0   20.59    7.72
   5  11   0   33.73   13.21
   5  11   1  136.52   14.76
   5  11   1  172.99   22.89
   5  11   1  179.17   25.29
   5  11   2   11.03   11.14
   5  11   2   18.67    6.47
   5  11   2    2.08    8.46
   5  11   3  139.95   21.18
   5  11   3  102.54   13.25
   5  11   3  138.31   23.19
   5  11   4  276.87   20.44
   5  11   4  254.90   29.58
   5  11   5  387.43   36.54
   5  11   5  307.20   20.20
   5  11   5  359.57   35.01
   5  11   6  112.60   20.61
   5  11   6   80.99   10.95
   5  11   6   88.72   19.16
   5  11   7  930.27   54.82
   5  11   7  793.05   51.70
   5  11   8  175.39   25.25
   5  11   8  217.45   28.01
   5  11   9  150.00   23.92
   5  11   9  116.73   20.34
   5  11  10    9.96   12.27
   5  11  11  328.48   35.35
   5  11  12   96.87   20.87
   5  11  13   39.58   17.87
   5  11  14  213.61   29.75
   5  11  15   10.70   14.81
   5  12  -7  145.05   23.04
   5  12  -7  176.59   30.54
   5  12  -6   54.39   14.67
   5  12  -6   48.49   18.56
   5  12  -5    6.23    9.82
   5  12  -5   -9.04   11.87
   5  12  -4   62.08   14.87
   5  12  -4   64.67   20.01
   5  12  -3   11.96    9.32
   5  12  -3   25.95   13.95
   5  12  -2   23.88    9.52
   5  12  -2    6.07   11.30
   5  12  -1  -12.19   11.93
   5  12  -1   -1.06    7.85
   5  12  -1   10.40   12.00
   5  12   0    2.51   11.46
   5  12   0   36.56   15.39
   5  12   1   14.28   10.09
   5  12   1   -5.64    9.36
   5  12   2   14.90   13.25
   5  12   2   -2.68   10.67
   5  12   3  151.63   24.53
   5  12   3  105.83   13.96
   5  12   3  158.25   25.70
   5  12   4   27.41   14.38
   5  12   4   12.24    5.76
   5  12   4   34.77   16.11
   5  12   5   75.74   20.23
   5  12   5   35.92    8.61
   5  12   5   52.00   17.70
   5  12   6  628.73   49.03
   5  12   6  582.64   47.25
   5  12   7  121.61   22.84
   5  12   7  145.73   24.68
   5  12   8   60.64   16.58
   5  12   8   58.77   17.39
   5  12   9  191.56   29.08
   5  12   9  131.30   23.79
   5  12  10  153.33   27.54
   5  12  11   40.96   16.74
   5  12  12   23.24   16.60
   5  13  -5   80.16   18.07
   5  13  -4   47.92   13.69
   5  13  -2   23.82   17.27
   5  13  -1   13.36   13.47
   5  13   0   33.04   16.84
   5  13   0   20.72   13.48
   5  13   1   -5.60   11.22
   5  13   1    5.68   11.09
   5  13   2   30.32   14.70
   5  13   2   17.70   11.41
   5  13   3  100.97   22.69
   5  13   3   60.25   12.19
   5  13   3   68.88   20.20
   5  13   4   62.99   20.34
   5  13   4   25.57    8.77
   5  13   4   42.26   18.39
   5  13   5  271.26   34.88
   5  13   5  255.51   34.19
   5  13   6  191.44   30.18
   5  13   6  167.76   29.25
   5  13   7  887.36   62.42
   5  13   7  772.34   57.93
   5  13   8   16.18   13.76
   5  13   8    7.21   13.54
   5  13   9  117.97   26.22
   5  13   9   35.23   13.77
   5  14   2  253.08   33.99
   5  14   2  115.99   18.14
   5  14   3   21.66   15.07
   5  14   4  278.23   37.23
   5  14   5  153.15   28.94
  -6  12  -4    4.99    8.57
  -6  11   7   34.34   13.16
  -6  11   6    1.03    9.19
  -6  11   5   33.31   11.96
  -6  11   4   73.45   15.55
  -6  11   4   53.60   14.49
  -6  11   3  164.12   21.64
  -6  11   3  197.70   24.52
  -6  11   2  118.20   18.63
  -6  11   2   97.86   18.02
  -6  11   1    7.98    8.14
  -6  11   1   20.46   10.43
  -6  11   0    4.67    6.95
  -6  11   0   16.86    8.97
  -6  11  -1   18.92    9.49
  -6  11  -1   21.37    9.47
  -6  11  -2   68.22   13.28
  -6  11  -2   94.81   17.93
  -6  11  -3   63.73   13.83
  -6  11  -3   99.56   18.82
  -6  11  -4   68.19   13.90
  -6  11  -4   41.65   12.93
  -6  11  -5   23.48    9.30
  -6  11  -5   14.34   10.38
  -6  11  -6    2.11    6.63
  -6  11  -7  241.36   23.51
  -6  10   8    9.65    9.26
  -6  10   7   15.95    9.69
  -6  10   7   17.01    9.93
  -6  10   6   66.54   13.84
  -6  10   6   55.38   13.58
  -6  10   5   57.32   14.26
  -6  10   5   51.47   11.89
  -6  10   4  242.88   24.74
  -6  10   4  221.58   24.74
  -6  10   3  116.84   18.72
  -6  10   3   89.13   15.74
  -6  10   2  183.53   20.87
  -6  10   2  169.26   20.97
  -6  10   1  263.88   24.95
  -6  10   1  329.64   29.13
  -6  10   0  101.65   15.01
  -6  10   0  101.15   16.49
  -6  10  -1  252.76   23.24
  -6  10  -1  253.95   25.27
  -6  10  -2   -2.19    6.30
  -6  10  -2   -0.54    7.10
  -6  10  -3   33.10   11.32
  -6  10  -3   11.12    6.86
  -6  10  -4   -0.99    6.56
  -6  10  -4    4.21    7.84
  -6  10  -5    0.48    6.29
  -6  10  -5    4.60    7.27
  -6  10  -6   28.41    8.87
  -6  10  -6   28.26   10.28
  -6  10  -7   17.28    7.19
  -6  10  -7   23.62   10.36
  -6  10  -8   88.97   13.64
  -6  10  -8   95.43   17.99
  -6  10  -9   44.87   13.53
  -6  10 -10  126.96   20.70
  -6  10 -11  331.16   34.54
  -6   9  10    7.74    7.76
  -6   9   9    5.29    9.06
  -6   9   8   30.53   10.13
  -6   9   8   36.04   11.05
  -6   9   7   10.88    8.24
  -6   9   7    5.25    6.62
  -6   9   6   -0.98    7.23
  -6   9   6    4.97    8.52
  -6   9   5   35.73   10.13
  -6   9   5   28.06   10.48
  -6   9   4    2.78    6.23
  -6   9   4   13.09    8.57
  -6   9   3  837.69   42.06
  -6   9   3  802.38   41.02
  -6   9   2  183.10   20.22
  -6   9   2  164.92   19.64
  -6   9   1  642.87   35.86
  -6   9   1  680.35   38.24
  -6   9   0  649.14   35.65
  -6   9   0  583.90   35.72
  -6   9  -1   44.22   10.31
  -6   9  -1   29.16    9.93
  -6   9  -2  208.72   21.75
  -6   9  -2  192.92   19.55
  -6   9  -3    7.17    5.87
  -6   9  -3    4.83    5.11
  -6   9  -4   14.56    7.53
  -6   9  -4   14.46    8.44
  -6   9  -5    6.44    7.70
  -6   9  -5   11.70    5.32
  -6   9  -6   -3.49    4.98
  -6   9  -6    3.42    6.04
  -6   9  -7   27.13    9.79
  -6   9  -7   26.12    8.13
  -6   9  -8   66.55   14.16
  -6   9  -8  106.15   13.87
  -6   9  -9  367.96   30.62
  -6   9  -9  325.91   23.22
  -6   9 -10  386.85   33.43
  -6   9 -11   23.88   11.05
  -6   9 -12  542.08   42.84
  -6   9 -13    2.54   11.34
  -6   9 -14   40.52   17.12
  -6   8  13   15.24   10.58
  -6   8  12  291.46   27.37
  -6   8  11   68.03   14.18
  -6   8  10   13.04    8.09
  -6   8   9    8.57    5.78
  -6   8   8    8.95    6.13
  -6   8   8    9.55    6.06
  -6   8   7   60.13   12.77
  -6   8   7   52.20   11.36
  -6   8   6   13.22    7.63
  -6   8   6   17.21    7.77
  -6   8   5    7.29    7.82
  -6   8   5    1.32    5.54
  -6   8   4   65.73   11.70
  -6   8   4   48.95   10.81
  -6   8   3  208.47   20.23
  -6   8   3  218.42   20.89
  -6   8   2  730.29   37.70
  -6   8   2  679.81   34.98
  -6   8   1   59.13   11.32
  -6   8   1   62.27   11.26
  -6   8   0    7.11    5.99
  -6   8   0    8.42    5.77
  -6   8  -1  332.23   25.83
  -6   8  -1  408.18   25.96
  -6   8  -2  210.21   20.62
  -6   8  -2  176.78   17.15
  -6   8  -3  119.61   16.13
  -6   8  -4   50.23   10.83
  -6   8  -5  191.81   19.93
  -6   8  -6    0.84    5.10
  -6   8  -7  101.47   15.36
  -6   8  -8   64.90   13.20
  -6   8  -9   38.18   11.08
  -6   8 -10   20.22    6.50
  -6   8 -10   42.22   11.63
  -6   8 -11  741.26   44.25
  -6   8 -12   35.35   12.13
  -6   8 -13  585.83   42.71
  -6   8 -14   73.94   18.09
  -6   8 -15    4.04   11.86
  -6   7  14  147.23   21.48
   6  -7 -14  151.98   22.70
  -6   7  13  198.03   23.09
   6  -7 -13  243.08   26.44
  -6   7  12   43.64   12.34
  -6   7  11   46.33   12.23
  -6   7  10  133.80   17.04
  -6   7   9  449.10   29.34
  -6   7   9  408.21   25.27
  -6   7   8   10.90    6.79
  -6   7   8   -2.43    5.13
   6  -7  -8    0.78    7.35
  -6   7   7  122.47   14.42
  -6   7   7   82.04   12.43
  -6   7   6    3.26    4.89
  -6   7   6   12.78    6.94
   6  -7  -6    4.41    7.09
  -6   7   5  240.12   20.18
   6  -7  -5  213.15   20.55
  -6   7   5  239.67   20.07
  -6   7   4   30.85    8.70
  -6   7   4   33.97    8.70
   6  -7  -4   39.87   11.20
  -6   7   3  287.80   22.42
  -6   7   3  285.66   21.19
   6  -7  -3  303.38   24.88
  -6   7   2   54.34   10.51
  -6   7   2   60.21   10.80
   6  -7  -2   58.36   11.33
  -6   7   1  924.63   39.34
  -6   7   0  158.91   16.64
  -6   7  -1  183.36   17.92
  -6   7  -2  348.43   24.36
  -6   7  -3  198.23   18.84
  -6   7  -4   67.66   11.57
  -6   7  -5  287.22   22.58
  -6   7  -6  180.92   18.29
  -6   7  -7    7.71    7.10
  -6   7  -8  177.36   18.85
  -6   7  -9   95.13   14.83
  -6   7 -10  578.37   35.50
  -6   7 -11   58.52   12.15
  -6   7 -12  296.04   27.67
  -6   7 -13   77.80   17.19
  -6   7 -14  444.45   36.84
  -6   7 -15   85.93   19.61
   6  -6 -15   30.87   14.51
  -6   6  14   21.55   11.60
   6  -6 -14   40.35   13.66
  -6   6  13   18.00    9.73
   6  -6 -13   44.05   11.47
  -6   6  12    4.21    7.71
   6  -6 -12   10.88    9.31
  -6   6  11    1.07    5.53
   6  -6 -11   10.31    8.83
  -6   6  10   35.15    9.32
   6  -6 -10   32.54   10.54
  -6   6   9  135.36   15.53
   6  -6  -9  152.10   19.09
  -6   6   9  106.13   11.96
   6  -6  -9  103.46   15.72
  -6   6   8  355.87   24.29
  -6   6   8  334.95   21.07
   6  -6  -8  375.01   28.48
   6  -6  -8  328.45   25.65
  -6   6   7   42.13    9.38
  -6   6   7   40.23    8.13
   6  -6  -7   41.31   11.32
  -6   6   6  332.72   21.51
   6  -6  -6  348.16   26.27
  -6   6   6  322.64   22.17
  -6   6   5   12.74    5.95
  -6   6   5   13.49    6.47
   6  -6  -5    9.93    6.97
  -6   6   4  158.39   15.33
   6  -6  -4  152.66   17.27
  -6   6   3   20.42    6.98
   6  -6  -3   12.70    7.43
  -6   6   2    2.22    3.42
   6  -6  -2    9.04    7.78
  -6   6   1   53.45    9.11
   6  -6  -1   70.34   13.02
  -6   6   0  424.16   24.31
   6  -6   0  388.99   27.03
  -6   6  -1  174.27   15.78
   6  -6   1  211.41   20.58
  -6   6  -2    2.32    3.90
  -6   6  -3   11.74    6.19
  -6   6  -4  301.47   20.65
  -6   6  -5    2.09    4.33
  -6   6  -6  112.09   13.12
  -6   6  -7  258.84   20.18
  -6   6  -8   74.43   11.47
  -6   6  -9  550.62   30.54
  -6   6 -10    1.09    5.79
  -6   6 -11  284.66   24.26
  -6   6 -12  232.92   23.16
  -6   6 -13  202.15   23.45
  -6   6 -14   76.43   15.83
  -6   6 -15  196.64   24.90
  -6   6 -16  339.75   32.93
   6  -5 -16    7.38   11.57
   6  -5 -15    2.85   10.80
  -6   5  14   88.06   16.39
   6  -5 -14   63.14   16.83
  -6   5  13   16.50    8.36
   6  -5 -13   41.72   13.37
  -6   5  12  165.93   18.54
   6  -5 -12  158.05   21.33
  -6   5  11   -4.58    6.65
   6  -5 -11   -8.53    8.32
  -6   5  10  161.28   16.89
   6  -5 -10  208.77   23.61
   6  -5 -10  178.76   20.77
  -6   5   9   71.85   11.94
   6  -5  -9   62.85   12.71
  -6   5   9   60.51    9.13
   6  -5  -9   56.26   13.25
  -6   5   8    3.19    5.38
  -6   5   8    0.97    4.01
   6  -5  -8   -0.61    7.41
   6  -5  -8   12.66    8.82
  -6   5   7  493.20   23.66
   6  -5  -7  487.88   31.57
   6  -5  -7  504.89   32.38
  -6   5   7  473.85   25.54
  -6   5   6   63.82    9.06
   6  -5  -6   64.51   12.75
  -6   5   6   59.24    9.59
   6  -5  -6   64.35   13.23
  -6   5   5  611.86   26.44
   6  -5  -5  614.45   34.18
  -6   5   4  741.97   29.29
   6  -5  -4  748.41   36.81
  -6   5   3  516.60   24.91
   6  -5  -3  469.44   28.97
  -6   5   2  202.21   15.74
   6  -5  -2  187.08   19.32
  -6   5   1   37.34    7.36
   6  -5  -1   28.25    8.19
  -6   5   0   91.82   10.87
   6  -5   0   90.45   13.86
  -6   5  -1  169.65   14.79
   6  -5   1  143.63   16.56
  -6   5  -2   10.27    4.43
   6  -5   2   26.37    9.90
  -6   5  -3  137.39   13.47
   6  -5   3  147.94   16.75
  -6   5  -4  154.53   14.10
   6  -5   4  180.15   18.87
  -6   5  -5 1110.80   37.31
  -6   5  -6  389.42   22.34
  -6   5  -7  582.11   27.89
  -6   5  -8  324.36   21.45
  -6   5  -9   24.80    7.09
  -6   5 -10  251.68   20.50
  -6   5 -11    0.89    5.34
  -6   5 -12  121.25   15.74
  -6   5 -13   -8.74    7.87
  -6   5 -14   -0.60    6.77
  -6   5 -15    7.42    8.52
  -6   5 -16   10.74   10.05
  -6   5 -18  175.20   38.04
  -6   5 -19   37.07   28.58
   6  -4 -16  135.17   23.49
   6  -4 -15   65.31   15.65
   6  -4 -14   16.52   11.25
  -6   4  13   40.07   10.99
   6  -4 -13   39.51   13.24
  -6   4  12  279.74   22.71
   6  -4 -12  285.79   28.19
  -6   4  11   -0.20    5.01
   6  -4 -11    1.99    8.56
   6  -4 -11   -1.47    7.15
   6  -4 -10   11.45    9.02
  -6   4  10    6.72    5.75
   6  -4 -10    8.56    8.95
   6  -4  -9   21.68   10.41
  -6   4   9   11.42    4.51
  -6   4   9   10.89    5.42
   6  -4  -9   30.14   10.05
  -6   4   8  103.09   10.47
   6  -4  -8  113.77   16.36
   6  -4  -8  105.75   15.11
  -6   4   8   73.76   10.49
  -6   4   7  401.77   19.38
   6  -4  -7  494.85   32.07
   6  -4  -7  485.92   31.16
  -6   4   6 1181.19   33.70
   6  -4  -6 1323.19   51.28
   6  -4  -6 1218.99   48.24
  -6   4   5 1340.19   36.55
   6  -4  -5 1397.69   50.38
   6  -4  -5 1288.95   48.37
  -6   4   4  270.06   17.04
   6  -4  -4  315.92   24.19
   6  -4  -4  313.97   23.34
  -6   4   3  191.09   14.52
   6  -4  -3  180.89   17.57
   6  -4  -3  220.33   20.97
  -6   4   2   32.76    6.57
   6  -4  -2   29.27   10.13
  -6   4   1  302.19   17.72
   6  -4  -1  283.40   22.85
  -6   4   0    9.88    4.70
   6  -4   0    3.40    6.99
  -6   4  -1  319.87   18.27
   6  -4   1  298.19   22.84
  -6   4  -2  135.61   12.15
   6  -4   2  137.47   16.45
  -6   4  -3   15.14    4.84
   6  -4   3    4.69    5.46
  -6   4  -4  542.48   23.97
   6  -4   4  484.70   28.83
  -6   4  -5   97.18   10.69
   6  -4   5   99.53   14.21
  -6   4  -6   70.95    9.30
   6  -4   6   71.39   12.18
  -6   4  -7  673.31   27.93
  -6   4  -8  436.23   23.02
  -6   4  -9 1178.68   38.97
  -6   4 -10   94.13   12.16
  -6   4 -11  171.75   16.76
  -6   4 -12  639.73   32.63
  -6   4 -13  295.05   23.11
  -6   4 -14   27.97   10.00
  -6   4 -15   49.48   13.72
  -6   4 -16   22.29    9.13
  -6   4 -18    1.79   18.25
  -6   4 -19  527.01   60.37
  -6   4 -20   36.97   31.89
   6  -3 -16   19.43   12.95
   6  -3 -15    0.06    9.18
   6  -3 -14    9.79   10.21
  -6   3  13   57.96   11.82
   6  -3 -13   29.73   12.61
  -6   3  12   61.30   11.36
   6  -3 -12   47.18   12.15
   6  -3 -12   61.54   13.92
  -6   3  11  384.42   24.20
   6  -3 -11  337.91   28.10
   6  -3 -11  334.55   28.85
  -6   3  10   73.85   11.15
   6  -3 -10   78.54   14.44
   6  -3 -10   48.94   12.37
  -6   3   9  102.58    9.28
   6  -3  -9  135.53   17.87
   6  -3  -9   93.21   15.19
  -6   3   9  100.77   11.65
  -6   3   8    5.88    3.30
   6  -3  -8   14.49    8.31
   6  -3  -8   22.64    9.68
   6  -3  -7  867.40   40.21
   6  -3  -7  917.98   42.66
  -6   3   6   34.71    5.94
   6  -3  -6   32.40    9.14
   6  -3  -6   42.98    9.45
  -6   3   5  108.65   10.11
   6  -3  -5  126.76   16.10
  -6   3   4 1392.15   35.01
   6  -3  -4 1428.61   49.44
   6  -3  -4 1357.51   48.63
   6  -3  -3  390.13   25.15
   6  -3  -3  357.31   25.04
  -6   3   3  357.84   17.80
  -6   3   2  610.81   23.05
   6  -3  -2  573.70   31.65
   6  -3  -2  650.45   30.65
   6  -3  -1  159.26   14.94
   6  -3  -1  186.78   18.40
  -6   3   1  159.69   12.15
   6  -3   0  169.20   18.14
  -6   3   0  157.59   11.93
   6  -3   1  473.39   28.72
  -6   3  -1  457.88   20.06
   6  -3   2  351.90   24.81
  -6   3  -2  320.65   16.94
   6  -3   3  529.46   30.13
  -6   3  -3  576.56   22.45
   6  -3   4   44.61    9.41
  -6   3  -4   42.25    6.84
  -6   3  -5    2.72    3.48
   6  -3   5    0.91    5.40
   6  -3   6  807.21   36.05
  -6   3  -6  752.05   26.47
  -6   3  -7  409.14   20.22
   6  -3   7  408.80   25.97
  -6   3  -8  342.29   19.08
  -6   3  -9  190.03   14.96
  -6   3 -10   75.40   10.00
  -6   3 -11  166.92   15.12
  -6   3 -12  805.57   34.44
  -6   3 -13   10.49    5.94
  -6   3 -14   52.03   10.95
  -6   3 -15  753.35   38.15
  -6   3 -16  370.05   27.89
  -6   3 -17  128.25   27.80
  -6   3 -18  396.36   45.70
  -6   3 -19  118.60   28.37
  -6   3 -20   19.71   22.01
   6  -2 -16   21.95   11.61
   6  -2 -15   42.63   14.64
   6  -2 -14   89.83   18.42
   6  -2 -13  193.07   23.60
   6  -2 -13  152.47   20.99
  -6   2  12  400.59   24.72
   6  -2 -12  314.82   28.94
   6  -2 -12  324.67   27.44
  -6   2  11    1.67    5.42
   6  -2 -11    5.74    7.85
   6  -2 -11   -9.97    9.04
   6  -2 -10  208.76   22.61
   6  -2 -10  202.49   21.81
  -6   2  10  217.84   16.70
  -6   2   9  144.28    9.84
   6  -2  -9  143.84   18.21
   6  -2  -9  179.30   19.76
  -6   2   8  539.79   18.95
   6  -2  -8  529.06   32.61
   6  -2  -8  474.17   30.42
  -6   2   7   13.86    4.08
   6  -2  -7   30.03    9.00
   6  -2  -7   29.00    9.37
  -6   2   6   25.01    5.14
   6  -2  -6   14.64    8.68
   6  -2  -6   25.94    8.98
   6  -2  -5  157.97   17.43
   6  -2  -5  147.11   16.92
  -6   2   5  161.22   11.01
   6  -2  -4    8.93    7.60
   6  -2  -4    7.85    6.34
   6  -2  -3   53.39   10.56
   6  -2  -3   62.47   12.25
   6  -2  -2    3.89    5.72
   6  -2  -2   -0.78    5.46
   6  -2  -1  509.10   26.39
   6  -2  -1  468.79   27.73
   6  -2   0  379.81   21.96
   6  -2   0  367.85   24.50
   6  -2   1   44.61    9.64
   6  -2   2  816.65   36.25
   6  -2   3  980.33   39.36
   6  -2   4  117.41   14.34
   6  -2   5  441.90   25.98
   6  -2   6  280.62   20.91
   6  -2   7   24.02    7.44
   6  -2   8  192.24   17.61
   6  -2   9  116.15   14.98
  -6   2 -11 3407.75   62.88
  -6   2 -12  749.11   30.69
  -6   2 -13   38.50    8.18
  -6   2 -14  105.86   14.05
  -6   2 -15 1393.60   48.70
  -6   2 -16   44.39   11.55
  -6   2 -17  697.11   51.24
  -6   2 -18   50.04   17.92
  -6   2 -19   66.90   19.27
   6  -1 -16   15.47   12.06
   6  -1 -15   33.28   13.33
   6  -1 -14  159.25   22.76
   6  -1 -13   60.41   13.60
   6  -1 -13   56.54   13.23
  -6   1  12  429.32   23.89
   6  -1 -12  351.11   30.37
   6  -1 -12  338.44   27.24
  -6   1  11  353.15   21.35
   6  -1 -11  292.57   26.59
   6  -1 -11  267.65   23.83
  -6   1  10   15.19    5.39
   6  -1 -10   22.30    8.60
   6  -1 -10   16.82    7.86
  -6   1   9  871.02   21.59
   6  -1  -9  878.89   43.13
   6  -1  -9  878.51   40.28
   6  -1  -8  159.27   18.35
  -6   1   8  191.51   10.51
   6  -1  -7  463.78   29.69
   6  -1  -7  457.49   28.09
   6  -1  -6   68.66   12.20
   6  -1  -6   61.49   10.66
   6  -1  -5  220.47   19.16
   6  -1  -5  190.88   18.00
   6  -1  -4   -2.59    6.27
   6  -1  -4   -2.15    5.51
   6  -1  -3   31.26    8.50
   6  -1  -3   62.76   11.54
   6  -1  -2  831.21   36.21
   6  -1  -2  831.61   34.08
   6  -1  -1   61.23    9.90
   6  -1  -1   53.40   10.27
   6  -1   0   82.01   10.45
   6  -1   0   94.26   12.65
   6  -1   1 1699.18   50.22
   6  -1   1 1599.93   41.22
   6  -1   2  787.72   34.26
   6  -1   3  491.29   27.21
   6  -1   4 1793.65   51.74
   6  -1   5  220.34   18.45
   6  -1   6  600.68   29.44
   6  -1   7   21.10    8.54
   6  -1   8  111.42   13.32
   6  -1   9   10.80    5.58
   6  -1  10  427.58   25.82
  -6   1 -14  212.71   17.49
  -6   1 -15  818.19   35.06
  -6   1 -16  473.45   35.83
  -6   1 -16  417.91   26.49
  -6   1 -17   49.62   11.28
  -6   1 -17   48.01   13.46
  -6   1 -18  221.62   25.08
   6   0 -16  159.28   23.96
   6   0 -15   43.46   14.90
   6   0 -14   31.05   11.74
   6   0 -14   35.14   11.38
   6   0 -13   31.93    9.53
   6   0 -13   55.61   13.70
   6   0 -12   74.45   15.33
   6   0 -12  108.94   15.83
   6   0 -11    3.62    5.51
  -6   0  11   25.83    5.85
   6   0 -11   23.28    9.21
   6   0 -10 1142.26   48.83
   6   0 -10 1114.43   44.66
   6   0  -9    3.38    4.99
   6   0  -9   15.03    6.75
   6   0  -8  643.85   34.63
   6   0  -8  693.02   33.65
   6   0  -7   78.00   13.24
   6   0  -7  107.40   13.88
   6   0  -6  193.79   19.04
   6   0  -6  215.77   18.33
   6   0  -5   58.96   11.70
   6   0  -5   89.23   12.69
   6   0  -4   34.83    8.93
   6   0  -4   30.42    8.63
   6   0  -3    4.64    4.69
   6   0  -3    3.86    4.43
   6   0  -2   15.76    5.92
   6   0  -2   12.17    6.10
   6   0  -1  419.08   25.19
   6   0  -1  404.30   22.93
   6   0   0   33.98    8.57
   6   0   0   16.87    6.32
   6   0   1   20.69    6.51
   6   0   1   19.14    5.99
   6   0   2  844.12   28.17
   6   0   2  842.28   34.59
   6   0   3  107.68   13.12
   6   0   4  590.24   28.51
   6   0   5 1215.00   40.78
   6   0   6  230.28   18.05
   6   0   7  345.19   21.43
   6   0   8   13.96    6.22
   6   0   9   73.37   10.93
   6   0  10   76.08   10.95
  -6   0 -15  209.29   19.73
  -6   0 -16   73.84   13.37
  -6   0 -16   89.00   12.37
  -6   0 -17  580.34   29.64
  -6   0 -17  485.63   29.72
   6   1 -16   71.71   18.01
   6   1 -15   38.73   13.20
   6   1 -15   25.40   10.90
   6   1 -14   -2.45    8.49
   6   1 -14   14.55    9.95
   6   1 -13   65.81   12.41
   6   1 -13   93.04   17.38
   6   1 -12  159.56   17.97
   6   1 -12  187.73   22.28
   6   1 -11  269.69   22.21
   6   1 -11  232.84   23.57
   6   1 -10   32.66    8.49
   6   1 -10   31.09    9.94
   6   1  -9  262.99   20.77
   6   1  -9  271.52   23.73
   6   1  -8   30.33    8.40
   6   1  -8   31.88    8.88
   6   1  -7    2.99    4.82
   6   1  -7   18.03    7.38
   6   1  -6 1150.98   42.93
   6   1  -6 1080.03   38.98
   6   1  -5  232.53   19.19
   6   1  -5  168.84   15.96
   6   1  -4  202.96   17.40
   6   1  -4  181.85   16.27
   6   1  -3  165.66   15.40
   6   1  -3  171.91   15.59
   6   1  -2  389.24   22.91
   6   1  -2  365.52   22.34
   6   1  -1 1130.96   37.24
   6   1  -1  977.76   35.94
   6   1   0   70.34    9.26
   6   1   0   34.21    8.04
   6   1   1 1228.85   40.68
   6   1   1 1183.03   34.37
   6   1   2  126.80   11.14
   6   1   2  152.93   15.01
   6   1   3 1168.22   30.95
   6   1   3 1247.44   41.21
  -6  -1  -4  432.31   20.27
   6   1   4  391.96   22.72
  -6  -1  -5  127.19   11.74
   6   1   5  137.25   13.35
  -6  -1  -6  468.54   20.39
   6   1   6  470.53   23.90
  -6  -1  -7   16.63    6.02
   6   1   7   14.42    5.74
  -6  -1  -8  209.81   13.40
   6   1   8  224.95   16.91
  -6  -1  -9  298.60   15.93
   6   1   9  339.12   20.65
   6   1  10  327.22   20.66
   6   1  11   10.23    6.35
  -6  -1 -14   54.56    9.13
  -6  -1 -15  199.76   15.73
  -6  -1 -16  502.05   25.05
   6   2 -16   24.96   12.58
   6   2 -15   29.24   10.17
   6   2 -15   17.80   11.14
   6   2 -14  161.32   19.24
   6   2 -14  182.06   23.28
   6   2 -13   28.12   11.56
   6   2 -13   25.08    8.67
   6   2 -12  216.72   20.86
   6   2 -12  226.69   24.03
   6   2 -11   30.30   10.06
   6   2 -11   23.34    7.79
   6   2 -10   19.28    7.56
   6   2 -10    9.81    5.83
   6   2  -9   28.79    8.12
   6   2  -9   19.92    7.19
   6   2  -8  103.76   12.76
   6   2  -8   97.57   13.39
   6   2  -7  223.03   18.09
   6   2  -7  232.35   19.85
   6   2  -6  148.64   14.78
   6   2  -6  144.75   15.47
   6   2  -5  294.14   20.09
   6   2  -5  273.23   20.30
   6   2  -4  368.31   21.84
   6   2  -4  394.63   24.12
   6   2  -3   13.75    6.53
   6   2  -3    4.22    4.95
   6   2  -2 1367.02   41.30
   6   2  -2 1345.41   40.98
   6   2  -1   53.56    8.50
   6   2  -1   64.47    9.49
   6   2   0  761.91   28.88
   6   2   0  786.83   31.16
   6   2   1  604.68   24.44
   6   2   1  601.80   27.41
   6   2   2 1120.21   37.80
   6   2   2 1089.73   30.96
   6   2   3  566.84   21.20
   6   2   3  514.37   25.20
  -6  -2  -3  539.94   22.75
   6   2   4  714.66   30.08
   6   2   4  666.07   21.83
  -6  -2  -4  704.59   24.82
   6   2   5  364.26   21.52
  -6  -2  -5  374.79   17.60
  -6  -2  -6  175.09   11.76
   6   2   6  166.33   14.38
  -6  -2  -7  920.98   25.35
   6   2   7  891.29   31.89
  -6  -2  -8   24.41    5.76
   6   2   8   24.45    6.25
   6   2   9   98.78   11.27
  -6  -2  -9   96.61    9.17
  -6  -2 -10  567.87   19.33
   6   2  10  595.85   26.75
  -6  -2 -11  208.55   12.41
   6   2  11  228.56   17.47
   6   2  12  162.27   15.98
  -6  -2 -13  299.70   15.16
  -6  -2 -14   38.37    6.59
  -6  -2 -15  331.28   18.00
   6   3 -16   73.38   15.78
   6   3 -15   26.54   11.11
   6   3 -15   -0.83    8.29
   6   3 -14   98.17   16.50
   6   3 -14  105.57   18.99
   6   3 -13  240.58   22.55
   6   3 -13  223.32   25.08
   6   3 -12    0.48    7.11
   6   3 -12    6.41    5.73
   6   3 -11  409.39   27.10
   6   3 -11  359.87   28.46
   6   3 -10   23.09    9.11
   6   3 -10   46.40   10.67
   6   3  -9  240.94   19.79
   6   3  -9  257.78   22.72
   6   3  -8   -2.71    5.39
   6   3  -8   -2.14    4.20
   6   3  -7   37.15    9.54
   6   3  -7   22.56    7.02
   6   3  -6    4.33    4.92
   6   3  -6    1.08    4.62
   6   3  -5   64.52    9.97
   6   3  -5   73.63   11.45
   6   3  -4  263.99   18.61
   6   3  -4  250.56   18.97
   6   3  -3  542.70   25.80
   6   3  -3  550.40   26.71
   6   3  -2   49.14    8.64
   6   3  -2   48.90    8.45
   6   3  -1 1458.94   41.22
   6   3  -1 1616.15   42.98
   6   3   0    5.79    4.19
   6   3   0    7.53    4.18
   6   3   1 1483.48   37.21
   6   3   1 1325.43   39.19
   6   3   2  289.34   16.31
  -6  -3  -2  268.78   16.30
   6   3   2  279.73   18.58
  -6  -3  -3  380.63   18.13
   6   3   3  424.11   22.42
   6   3   3  430.59   18.33
   6   3   4   24.30    8.29
   6   3   4   13.21    5.07
   6   3   4   21.11    4.64
  -6  -3  -4   19.36    5.58
   6   3   5   63.88   11.99
  -6  -3  -5   60.65    6.95
   6   3   5   43.15    7.57
   6   3   5   58.66    6.70
   6   3   6  243.97   22.45
  -6  -3  -6  301.68   13.21
   6   3   6  286.21   18.67
   6   3   7  502.68   31.27
   6   3   7  534.55   24.28
  -6  -3  -7  600.37   17.24
   6   3   8  341.79   26.01
   6   3   8  349.75   19.48
  -6  -3  -8  370.45   12.78
  -6  -3  -9  124.62    7.71
   6   3   9  136.76   17.61
   6   3   9  115.73   11.42
  -6  -3 -10    6.78    3.00
   6   3  10   13.15    7.77
   6   3  10    2.37    4.39
   6   3  11  421.75   29.92
  -6  -3 -11  380.14   12.69
   6   3  11  457.08   23.02
   6   3  12  310.63   27.10
   6   3  12  447.85   24.34
  -6  -3 -13  128.94    8.22
   6   3  13  207.62   22.66
   6   3  14  494.88   35.01
   6   3  15    1.33    7.52
   6   3  16  191.63   23.70
   6   3  17   34.48   13.66
   6   4 -16   11.28   10.38
   6   4 -15   66.62   15.90
   6   4 -15   60.83   14.13
   6   4 -14   55.90   14.81
   6   4 -14   63.44   14.34
   6   4 -13   50.31   13.76
   6   4 -13   44.18   10.91
   6   4 -12  132.03   16.31
   6   4 -12  174.95   21.32
   6   4 -11    3.38    5.83
   6   4 -11    4.28    5.62
   6   4 -10  244.88   20.93
   6   4 -10  258.37   24.12
   6   4  -9    1.93    5.73
   6   4  -9   -1.96    4.92
   6   4  -8   28.37    7.98
   6   4  -8   47.87    9.69
   6   4  -7    5.36    6.06
   6   4  -7    9.46    4.96
   6   4  -6    8.24    4.99
   6   4  -6   10.16    4.64
   6   4  -5   17.34    6.32
   6   4  -5   19.41    6.11
   6   4  -4  155.91   14.60
   6   4  -4  137.28   14.20
   6   4  -3  342.60   20.87
   6   4  -3  342.04   20.89
   6   4  -2  669.21   28.09
   6   4  -2  696.86   28.67
   6   4  -1   27.27    6.61
   6   4  -1   42.53    7.63
   6   4   0 1577.10   42.22
   6   4   0 1542.71   39.47
   6   4   1  192.52   14.94
   6   4   1  206.63   14.13
   6   4   2  183.90   12.85
  -6  -4  -2  189.87   14.22
   6   4   2  184.87   19.06
   6   4   2  202.94   15.23
  -6  -4  -3  768.61   25.05
   6   4   3  743.11   23.95
   6   4   3  777.47   37.53
   6   4   3  777.66   29.20
  -6  -4  -4  265.11   13.74
   6   4   4  244.04   22.16
   6   4   4  250.58   16.97
   6   4   4  227.78   12.58
   6   4   5  388.85   14.81
  -6  -4  -5  370.66   14.49
   6   4   5  442.41   29.03
   6   4   5  422.87   22.10
   6   4   6  525.35   31.76
   6   4   6  544.23   24.89
   6   4   7  164.39   18.43
   6   4   7  181.81   14.64
   6   4   8   19.16    7.78
   6   4   8   11.97    5.66
   6   4   9    4.93    7.83
   6   4   9   -0.81    4.01
   6   4  10  357.52   27.52
   6   4  10  380.13   20.07
   6   4  11  244.06   23.02
   6   4  11  297.52   18.22
   6   4  12  737.83   40.97
   6   4  12  998.35   35.79
   6   4  13  983.19   47.78
   6   4  13 1528.10   49.79
   6   4  14  334.46   28.95
   6   4  15  361.84   31.23
   6   4  16   62.66   14.52
   6   4  17    0.72    9.89
   6   4  18    2.71    8.83
   6   4  19   15.96   12.10
   6   4  20   48.98   15.89
   6   5 -15   89.28   16.84
   6   5 -14   93.88   16.27
   6   5 -14  128.83   21.49
   6   5 -13   61.61   12.98
   6   5 -13   95.95   17.96
   6   5 -12  192.26   20.50
   6   5 -12  187.85   23.60
   6   5 -11  195.61   19.92
   6   5 -11  212.99   23.40
   6   5 -10   22.08    8.84
   6   5 -10   49.22   10.75
   6   5  -9    3.76    5.76
   6   5  -9    1.10    5.31
   6   5  -8  183.49   17.81
   6   5  -8  158.09   17.81
   6   5  -7  133.57   14.78
   6   5  -7  117.06   14.76
   6   5  -6    8.51    5.58
   6   5  -6    0.94    3.94
   6   5  -5    7.71    5.35
   6   5  -5   12.41    6.08
   6   5  -4   41.54    8.10
   6   5  -4   49.20    8.95
   6   5  -3  176.53   15.56
   6   5  -3  184.62   15.44
   6   5  -2  374.01   21.42
   6   5  -2  371.81   20.92
   6   5  -1  509.20   24.45
   6   5  -1  506.11   23.45
   6   5   0   28.44    5.63
   6   5   0   36.31   10.05
   6   5   0   31.28    7.01
   6   5   1  557.18   25.25
   6   5   1  566.10   22.89
   6   5   2  472.81   23.34
   6   5   2  417.70   18.88
   6   5   3  295.05   24.13
   6   5   3  264.91   17.01
   6   5   3  261.47   14.40
   6   5   4 1073.20   26.54
   6   5   4 1117.73   46.76
   6   5   4 1085.43   34.53
   6   5   5    3.94    2.76
   6   5   5   -0.42    3.72
   6   5   6    4.48    6.72
   6   5   6   12.74    3.22
   6   5   6   22.69    5.93
   6   5   7   -6.08    6.57
   6   5   7    6.95    4.30
   6   5   8    7.78    7.07
   6   5   8    3.74    4.29
   6   5   9   73.65   13.84
   6   5   9   75.89    9.65
   6   5  10  123.02   17.35
   6   5  10  146.57   12.48
   6   5  11  452.64   31.89
   6   5  11  501.89   22.96
   6   5  12  104.62   17.63
   6   5  12   95.70   11.61
   6   5  13 1012.52   49.14
   6   5  14  676.12   41.14
   6   5  15   34.04   12.02
   6   5  16  283.84   28.76
   6   5  17  224.76   26.39
   6   5  18   42.03   15.20
   6   5  19   81.62   19.55
   6   5  20  107.61   22.13
   6   6 -14   38.04   11.76
   6   6 -13  147.81   19.78
   6   6 -13  155.13   22.57
   6   6 -12   54.64   14.43
   6   6 -12   57.37   13.14
   6   6 -11    4.78    7.06
   6   6 -11   10.52    8.75
   6   6 -10  133.23   16.95
   6   6 -10  113.81   17.00
   6   6  -9   17.81    7.18
   6   6  -9   34.98    9.43
   6   6  -8  193.78   19.16
   6   6  -8  143.43   17.65
   6   6  -7  217.71   19.81
   6   6  -7  212.92   20.56
   6   6  -6  300.78   22.18
   6   6  -6  255.79   21.49
   6   6  -5  156.03   15.95
   6   6  -5   86.82   12.21
   6   6  -4  344.67   22.62
   6   6  -4  357.44   23.44
   6   6  -3  115.06   13.39
   6   6  -3   85.56   11.49
   6   6  -2 1170.96   39.20
   6   6  -2 1136.47   37.68
   6   6  -1  197.68   20.20
   6   6  -1  177.34   15.57
   6   6  -1  155.27   13.60
   6   6   0  813.98   31.44
   6   6   0  813.73   28.43
   6   6   1   27.36    5.52
   6   6   1   18.33    7.67
   6   6   1   16.50    5.59
   6   6   2  565.83   25.30
   6   6   2  651.59   23.84
   6   6   3  855.11   30.74
   6   6   3  812.82   24.57
   6   6   4  104.66   15.26
   6   6   4   84.70   10.23
   6   6   4   92.71    8.38
   6   6   5    0.05    2.71
   6   6   5   -3.75    6.93
   6   6   5    2.06    3.91
   6   6   6  832.31   40.93
   6   6   6  811.96   29.51
   6   6   7   42.90   10.69
   6   6   7   54.73    8.76
   6   6   8  174.61   20.00
   6   6   8  204.32   15.29
   6   6   9  182.64   20.88
   6   6   9  250.39   16.69
   6   6  10  410.54   30.66
   6   6  10  407.93   20.54
   6   6  11  147.00   19.24
   6   6  11  196.81   14.56
   6   6  12  227.64   23.98
   6   6  12  232.77   16.62
   6   6  13 1128.28   53.43
   6   6  14    7.58    8.09
   6   6  15  270.41   28.27
   6   6  16   25.04   12.31
   6   6  17  363.21   33.44
   6   6  18   47.01   13.19
   6   6  19   68.02   19.46
   6   6  20   13.33   12.08
   6   6  21   43.94   17.01
   6   7 -13   21.74   10.99
   6   7 -12   71.44   15.60
   6   7 -12   78.94   15.32
   6   7 -11   -1.53    8.00
   6   7 -11   33.95   10.52
   6   7 -10   -2.50    8.04
   6   7 -10    1.85    6.72
   6   7  -9   28.55    9.41
   6   7  -9   35.13   10.81
   6   7  -8   47.67   11.11
   6   7  -8   38.08   10.12
   6   7  -7  228.54   21.29
   6   7  -7  255.62   22.98
   6   7  -6   -1.23    5.10
   6   7  -6    9.01    6.39
   6   7  -5  132.38   15.25
   6   7  -5  149.40   16.27
   6   7  -4   20.43    6.45
   6   7  -4   22.06    7.54
   6   7  -3  507.38   27.86
   6   7  -3  516.09   27.64
   6   7  -2   70.44   13.91
   6   7  -2   80.56   11.58
   6   7  -2   76.02   10.53
   6   7  -1   38.50   11.28
   6   7  -1   29.42    7.38
   6   7  -1   22.91    6.40
   6   7   0   71.06   14.56
   6   7   0   78.09   11.01
   6   7   0   68.41    9.20
   6   7   1    1.13    3.89
   6   7   1    1.17    3.39
   6   7   2   11.65    3.74
   6   7   2   17.80    6.26
   6   7   3   88.54   11.06
   6   7   3   75.44    8.03
   6   7   4   30.45   10.16
   6   7   4   36.24    6.93
   6   7   4   44.04    5.85
   6   7   5    2.61    6.47
   6   7   5   11.96    4.16
   6   7   5   10.81    4.89
   6   7   6  252.83   24.64
   6   7   6  240.19   16.66
   6   7   7 2160.14   69.34
   6   7   7 2093.45   47.67
   6   7   8    2.48    7.16
   6   7   8    2.36    4.03
   6   7   9  370.54   29.78
   6   7   9  607.50   26.03
   6   7  10   21.70   10.43
   6   7  10   12.68    5.59
   6   7  11   29.94   10.31
   6   7  11   25.06    6.76
   6   7  12  189.50   23.30
   6   7  13  103.99   19.29
   6   7  14   13.44    9.16
   6   7  15  167.92   23.64
   6   7  16  355.65   33.35
   6   7  17   77.34   18.32
   6   7  18   30.26   13.94
   6   7  19   17.68   13.36
   6   7  20  392.38   39.87
   6   7  21   15.40   16.96
   6   8 -12   33.70   12.67
   6   8 -11    2.00    7.07
   6   8 -11    0.23    9.29
   6   8 -10   16.19    9.17
   6   8 -10   48.78   13.95
   6   8  -9    9.18    8.01
   6   8  -9   -1.98    7.57
   6   8  -8    3.77    5.90
   6   8  -8    1.03    6.05
   6   8  -7   38.73   10.25
   6   8  -7   32.60   10.53
   6   8  -6  632.84   36.01
   6   8  -6  540.12   32.13
   6   8  -5   46.71   10.28
   6   8  -5   49.58   10.71
   6   8  -4  715.91   35.46
   6   8  -4  711.60   35.32
   6   8  -3    7.51    9.47
   6   8  -3    4.21    4.49
   6   8  -3   -4.05    5.38
   6   8  -2  102.71   13.02
   6   8  -2  109.90   13.84
   6   8  -1  170.75   20.38
   6   8  -1  173.28   15.45
   6   8  -1  183.87   17.16
   6   8   0   -2.99    7.67
   6   8   0    5.44    4.74
   6   8   0   15.74    5.97
   6   8   1  160.13   19.74
   6   8   1  125.40   11.88
   6   8   1  143.42   14.46
   6   8   2   46.91    8.37
   6   8   2   42.98    6.93
   6   8   3   60.97   13.53
   6   8   3   54.46    9.40
   6   8   3   40.97    6.14
   6   8   4   23.70    4.65
   6   8   4   17.59    5.08
   6   8   5  117.71   18.06
   6   8   5   94.73   10.98
   6   8   5   84.04    7.47
   6   8   6 1027.33   49.14
   6   8   6  939.87   33.14
   6   8   7   24.88   10.42
   6   8   7   16.13    6.21
   6   8   8  718.43   41.66
   6   8   8  845.85   31.42
   6   8   9   40.12   10.80
   6   8   9   32.79    7.80
   6   8  10  107.07   17.77
   6   8  10  154.97   15.08
   6   8  11  191.14   24.13
   6   8  12  261.61   28.22
   6   8  13   18.54   10.33
   6   8  14   88.03   18.48
   6   8  15   -1.12    9.45
   6   8  16   13.48   11.50
   6   8  17  148.39   29.93
   6   8  18   -1.76   10.33
   6   8  19   13.26   11.80
   6   8  20  153.04   26.67
   6   9 -10   -4.40    8.13
   6   9 -10    1.49    8.28
   6   9  -9   65.92   14.50
   6   9  -9   44.58   13.20
   6   9  -8    4.56    6.34
   6   9  -8   15.63   10.47
   6   9  -7   18.03    8.50
   6   9  -7   19.99    9.53
   6   9  -6    3.31    5.82
   6   9  -6    4.28    6.93
   6   9  -5  215.66   21.25
   6   9  -5  236.56   22.14
   6   9  -4    6.15    7.40
   6   9  -4   -2.81    5.85
   6   9  -3  109.16   14.69
   6   9  -3   86.43   16.65
   6   9  -3   92.80   13.79
   6   9  -2   24.14   10.46
   6   9  -2   23.33    8.19
   6   9  -2   10.73    5.04
   6   9  -1  268.67   26.40
   6   9  -1  223.65   18.81
   6   9  -1  208.33   18.69
   6   9  -1  206.44   24.62
   6   9   0    3.39    8.84
   6   9   0   14.59    5.68
   6   9   0    8.46    4.93
   6   9   0   14.62    8.85
   6   9   1   17.78    9.83
   6   9   1    3.30    3.91
   6   9   1    6.23    8.93
   6   9   1   13.72    6.96
   6   9   2   87.50   16.42
   6   9   2   61.46    8.70
   6   9   2   90.77   11.97
   6   9   2   82.06   16.06
   6   9   3   26.17   11.24
   6   9   3   19.06    5.92
   6   9   3   19.19    5.60
   6   9   4   20.76    6.34
   6   9   4   19.75    4.82
   6   9   5  171.62   21.15
   6   9   5  129.10   13.25
   6   9   6  258.90   26.10
   6   9   6  193.22   15.57
   6   9   7   -3.41    7.44
   6   9   7   -3.46    4.33
   6   9   8  353.63   31.10
   6   9   8  291.95   18.85
   6   9   9  330.22   30.16
   6   9   9  301.53   19.77
   6   9  10  392.46   33.30
   6   9  11  182.63   23.58
   6   9  12  278.50   28.72
   6   9  13  110.24   19.87
   6   9  14   16.73   11.80
   6   9  15  121.99   21.66
   6   9  16   16.31   11.13
   6   9  17    0.95   10.88
   6   9  18    3.02   11.03
   6  10  -9   52.79   14.49
   6  10  -8   16.85   10.08
   6  10  -8    8.81    8.64
   6  10  -7  133.01   19.59
   6  10  -7  126.86   18.87
   6  10  -6  133.96   18.59
   6  10  -6  148.25   18.76
   6  10  -5   42.41   11.09
   6  10  -5   24.66    9.63
   6  10  -4  185.60   20.69
   6  10  -4  171.13   19.47
   6  10  -3    1.75    6.17
   6  10  -3    3.77    6.06
   6  10  -3  -11.84   11.22
   6  10  -2   43.88   12.74
   6  10  -2   42.56   10.07
   6  10  -2   52.87   11.19
   6  10  -2   75.73   17.41
   6  10  -1    5.48    8.29
   6  10  -1    6.63    5.22
   6  10  -1   -0.20    4.99
   6  10  -1   -5.19    8.69
   6  10   0   22.99   10.68
   6  10   0    9.87    6.18
   6  10   0   16.47    6.86
   6  10   0   -1.81    8.91
   6  10   1   77.12   16.19
   6  10   1   54.13   10.94
   6  10   1   38.19    8.94
   6  10   1   47.00   15.10
   6  10   2  482.24   37.18
   6  10   2  399.03   22.89
   6  10   2  424.10   25.74
   6  10   2  525.72   40.96
   6  10   3   -1.82    7.56
   6  10   3    7.10    4.56
   6  10   3   -2.97    8.78
   6  10   4  367.23   32.01
   6  10   4  377.33   23.56
   6  10   4  367.32   33.65
   6  10   5  103.42   18.41
   6  10   5   72.38   10.06
   6  10   6  145.01   21.35
   6  10   6  126.63   13.65
   6  10   7   58.51   14.81
   6  10   7   39.46    8.73
   6  10   8  617.23   43.16
   6  10   8  502.78   25.65
   6  10   9   76.49   16.23
   6  10  10  190.40   25.44
   6  10  11   88.20   18.36
   6  10  12  214.32   27.28
   6  10  13  103.98   20.35
   6  10  14   24.21   11.57
   6  10  15    3.67   10.79
   6  10  16  112.08   22.52
   6  10  17  174.39   28.20
   6  11  -8   47.05   15.93
   6  11  -7  124.65   20.39
   6  11  -6    8.02    8.88
   6  11  -6    4.40    8.24
   6  11  -5   45.93   13.46
   6  11  -5   27.42   12.20
   6  11  -4   43.96   12.59
   6  11  -4   29.66   11.14
   6  11  -3   16.96    8.10
   6  11  -3   21.20    7.93
   6  11  -3   16.02   11.13
   6  11  -2    9.55    8.45
   6  11  -2   10.78    7.79
   6  11  -2    6.05   10.37
   6  11  -1   31.92   12.61
   6  11  -1   15.45    8.50
   6  11  -1   20.00    8.19
   6  11  -1   45.25   15.68
   6  11   0   39.35   14.07
   6  11   0   15.68    7.67
   6  11   0   28.53    9.20
   6  11   0   50.22   15.90
   6  11   1   30.64   11.69
   6  11   1   25.82    8.63
   6  11   1   27.81   13.20
   6  11   2   85.69   18.08
   6  11   2   53.61   10.71
   6  11   2   89.83   19.49
   6  11   3  540.73   40.72
   6  11   3  455.56   27.39
   6  11   3  447.22   39.99
   6  11   4   22.35   11.18
   6  11   4   20.59    7.64
   6  11   4   28.07   13.89
   6  11   5  285.62   30.15
   6  11   5  203.67   18.01
   6  11   5  265.43   30.15
   6  11   6   32.92   12.76
   6  11   6   30.42    8.41
   6  11   7   26.27   12.35
   6  11   7   25.92    7.77
   6  11   8  408.70   37.84
   6  11   9   63.83   16.17
   6  11  10   49.63   17.31
   6  11  11   15.83   11.66
   6  11  12   19.23   12.60
   6  11  13   35.90   15.46
   6  11  14   84.39   19.67
   6  12  -6   89.20   18.74
   6  12  -5    5.18   10.99
   6  12  -4   18.04   11.13
   6  12  -4   12.62   10.16
   6  12  -4   26.94   14.46
   6  12  -3    4.84    8.25
   6  12  -3    2.16    8.59
   6  12  -3   15.14   16.61
   6  12  -2   -5.17    7.96
   6  12  -2    2.61   14.09
   6  12  -1   10.76    7.47
   6  12  -1   42.01   15.78
   6  12   0   14.62   13.90
   6  12   0    7.68    7.61
   6  12   0   18.25   14.30
   6  12   1   26.10   15.15
   6  12   1   27.69    8.69
   6  12   1   10.37   11.10
   6  12   2  109.04   22.14
   6  12   2   80.74   14.12
   6  12   2   79.25   20.46
   6  12   3   52.88   18.24
   6  12   3   43.41   10.60
   6  12   3   52.20   19.74
   6  12   4  468.22   40.68
   6  12   4  362.13   25.70
   6  12   4  375.19   38.95
   6  12   5   11.96   11.80
   6  12   5   -1.13    5.77
   6  12   5   21.32   14.23
   6  12   6   52.64   16.19
   6  12   6   35.78    8.66
   6  12   6   29.41   13.76
   6  12   7  360.44   36.89
   6  12   8   91.30   20.72
   6  12   9   19.91   11.96
   6  12  10  172.69   27.58
   6  12  11   27.22   13.63
   6  12  12   12.57   13.01
   6  13  -1  101.70   16.73
   6  13   0    5.38    8.59
   6  13   1  107.31   25.51
   6  13   1   89.87   15.04
   6  13   1   83.28   21.25
   6  13   2   -9.06   14.86
   6  13   2   -5.31    7.60
   6  13   2  -12.57   15.20
   6  13   3  187.35   29.22
   6  13   3  118.79   16.46
   6  13   3  207.15   32.46
   6  13   4   -9.66   11.87
   6  13   4    7.98    6.38
   6  13   4   -0.79   11.64
   6  13   5  378.45   39.40
   6  13   5  388.13   41.22
   6  13   6   88.95   21.24
   6  13   6  104.41   24.16
   6  13   7  229.12   32.14
   6  13   8   17.09   13.77
   6  14   3   46.45   21.70
  -7  11  -1   34.67   10.84
  -7  11  -2  193.99   22.54
  -7  11  -3   12.84    9.14
  -7  11  -4   82.04   14.77
  -7  11  -5  111.03   18.09
  -7  11  -6   38.03   11.68
  -7  11  -7  240.62   24.47
  -7  10   7    0.90    9.79
  -7  10   6  202.43   23.20
  -7  10   5  105.83   17.77
  -7  10   4  333.17   30.23
  -7  10   4  290.75   27.68
  -7  10   3  250.48   25.65
  -7  10   3  207.87   24.10
  -7  10   2    7.84    9.22
  -7  10   2   24.36   12.07
  -7  10   1  172.60   21.70
  -7  10   1  157.08   21.23
  -7  10   0   70.93   13.79
  -7  10   0   78.36   16.54
  -7  10  -1  117.25   18.21
  -7  10  -1  123.70   19.54
  -7  10  -2   69.74   14.16
  -7  10  -2   69.88   15.81
  -7  10  -3  128.53   18.04
  -7  10  -3  108.87   17.97
  -7  10  -4    6.92    8.06
  -7  10  -4   15.75   11.27
  -7  10  -5   19.12    8.75
  -7  10  -5    3.15    6.92
  -7  10  -6  238.70   22.29
  -7  10  -6  233.37   25.56
  -7  10  -7   50.10   10.97
  -7  10  -7   50.64   15.12
  -7  10  -8   -1.38    6.43
  -7  10  -8    2.79    8.48
  -7   9   8    8.31    9.71
  -7   9   7   93.92   16.60
  -7   9   7   56.41   13.31
  -7   9   6    7.45    8.12
  -7   9   6   -2.57    7.04
  -7   9   5  356.37   28.67
  -7   9   5  423.49   31.41
  -7   9   4   84.87   16.11
  -7   9   4   89.56   16.24
  -7   9   3  238.08   23.92
  -7   9   3  277.41   26.07
  -7   9   2  242.39   23.77
  -7   9   2  228.27   23.67
  -7   9   1   15.39    8.34
  -7   9   1   15.25    8.97
  -7   9   0  270.63   26.18
  -7   9   0  289.58   25.23
  -7   9  -1   60.42   12.89
  -7   9  -1   91.84   16.11
  -7   9  -2   44.67   11.23
  -7   9  -2   37.28   10.30
  -7   9  -3   62.99   11.47
  -7   9  -3   58.39   13.95
  -7   9  -4   43.20    9.94
  -7   9  -4   58.54   12.63
  -7   9  -5   13.70    8.57
  -7   9  -5    6.74    6.22
  -7   9  -6   41.73   10.01
  -7   9  -6   57.99   12.87
  -7   9  -7   70.92   11.53
  -7   9  -7   68.42   14.27
  -7   9  -8  616.40   40.53
  -7   9  -8  561.48   31.29
  -7   9  -9   29.27    8.71
  -7   9  -9   24.40   11.11
  -7   9 -10  852.29   49.68
  -7   9 -11   37.91   14.08
  -7   9 -12   89.72   19.73
  -7   8  10   -0.07    6.95
  -7   8   9  -11.87    9.30
  -7   8   8  135.74   18.06
  -7   8   8   85.73   14.27
  -7   8   7    0.02    7.17
  -7   8   7    2.88    6.50
  -7   8   6  186.68   20.34
  -7   8   6  201.36   20.25
  -7   8   5   -6.83    7.52
  -7   8   5   -0.10    6.27
  -7   8   4  501.70   31.89
  -7   8   4  477.59   31.22
  -7   8   3  261.76   23.69
  -7   8   3  290.75   24.68
  -7   8   2  384.87   28.56
  -7   8   2  354.97   25.94
  -7   8   1   87.11   14.45
  -7   8   1  104.21   14.71
  -7   8   0  154.56   19.04
  -7   8   0  143.58   17.14
  -7   8  -1   11.04    7.05
  -7   8  -2   77.51   13.69
  -7   8  -3   -0.80    6.41
  -7   8  -4    9.33    6.76
  -7   8  -5   25.33    7.79
  -7   8  -6    8.18    6.70
  -7   8  -7  109.07   16.23
  -7   8  -8  285.03   26.21
  -7   8  -9  307.36   28.03
  -7   8 -10   66.49   14.02
  -7   8 -11  257.67   27.66
  -7   8 -12  109.19   19.70
  -7   8 -13  104.79   19.81
  -7   8 -14   70.09   18.40
  -7   8 -15   23.38   15.56
  -7   7  13   -5.87   11.82
  -7   7  12   28.61   11.53
  -7   7  11   55.34   11.96
  -7   7  10    7.33    8.40
  -7   7   9  524.33   32.55
  -7   7   8   87.98   14.70
  -7   7   8   62.19   11.18
   7  -7  -8   63.52   13.91
  -7   7   7   22.41    7.94
  -7   7   7   29.20    8.62
   7  -7  -7   26.78   11.00
  -7   7   6    8.04    6.34
  -7   7   6   13.32    7.10
   7  -7  -6    0.13    7.93
  -7   7   5  251.47   21.63
   7  -7  -5  202.29   22.01
  -7   7   5  223.50   20.37
  -7   7   4   13.25    8.08
  -7   7   4    5.94    5.38
   7  -7  -4   16.45    9.32
  -7   7   3  315.79   24.33
   7  -7  -3  275.40   25.14
  -7   7   3  241.57   20.94
  -7   7   2  334.76   25.32
   7  -7  -2  370.85   29.17
  -7   7   1  214.41   20.09
   7  -7  -1  222.38   23.27
  -7   7   0    6.79    6.23
   7  -7   0   -2.25    6.56
  -7   7  -1  334.77   24.53
  -7   7  -2   29.92    7.75
  -7   7  -3   43.72   10.48
  -7   7  -4  190.74   18.76
  -7   7  -5    3.95    5.19
  -7   7  -6  183.88   18.93
  -7   7  -7   10.89    6.19
  -7   7  -8  180.18   19.41
  -7   7  -9   33.67   10.06
  -7   7 -10  230.53   23.77
  -7   7 -11  182.07   22.21
  -7   7 -12  636.03   41.05
  -7   7 -13   15.29   10.71
  -7   7 -14   35.89   13.38
  -7   7 -15   84.04   19.71
  -7   7 -16   49.74   17.66
  -7   6  13   15.54   10.09
   7  -6 -13   41.15   15.51
   7  -6 -12   70.22   16.00
  -7   6  12   57.34   12.20
  -7   6  11   69.91   13.89
   7  -6 -11   53.60   14.78
  -7   6  10  189.02   19.84
   7  -6 -10  209.10   24.46
  -7   6   9   51.91   10.74
   7  -6  -9   29.37   11.32
   7  -6  -9   44.84   11.29
  -7   6   8  504.55   29.82
  -7   6   8  447.54   25.45
   7  -6  -8  476.89   33.73
  -7   6   7   72.41   11.26
   7  -6  -7   56.93   13.30
  -7   6   7   75.90   12.31
  -7   6   6  292.20   21.16
   7  -6  -6  281.46   25.42
  -7   6   6  287.48   21.69
  -7   6   5  110.13   13.84
   7  -6  -5  105.44   16.49
  -7   6   5   92.37   13.07
  -7   6   4    6.34    5.30
   7  -6  -4   17.97    9.46
  -7   6   3  133.94   15.10
   7  -6  -3  167.69   19.63
  -7   6   2  105.13   13.27
   7  -6  -2   84.63   14.14
  -7   6   1  330.40   22.77
   7  -6  -1  295.45   24.96
  -7   6   0    0.69    5.24
   7  -6   0   12.66    8.33
  -7   6  -1   25.52    7.38
   7  -6   1   22.65    8.93
  -7   6  -2  320.67   22.37
   7  -6   2  304.83   26.32
  -7   6  -3   30.57    7.68
   7  -6   3   27.67    9.65
  -7   6  -4  132.76   14.76
  -7   6  -5  678.13   32.43
  -7   6  -6  141.65   15.59
  -7   6  -7   57.88   10.71
  -7   6  -8   32.94    8.45
  -7   6  -9  152.82   17.05
  -7   6 -10    8.89    6.54
  -7   6 -11  152.00   18.56
  -7   6 -12   11.09    8.38
  -7   6 -13   10.35   10.00
  -7   6 -14   23.01   11.30
  -7   6 -15  167.90   24.71
  -7   6 -16   68.59   18.00
   7  -5 -14   31.21   15.06
  -7   5  13    7.29    8.30
   7  -5 -13   45.11   17.52
  -7   5  12  106.54   16.17
   7  -5 -12  105.89   20.01
   7  -5 -11   -1.45    8.99
  -7   5  11    7.65    6.38
  -7   5  10   34.92    8.95
   7  -5 -10   59.18   14.98
   7  -5 -10   32.35   13.42
  -7   5   9  874.81   38.33
   7  -5  -9  837.24   46.11
   7  -5  -9  925.38   47.45
  -7   5   8   29.37    8.10
  -7   5   8   23.87    6.11
   7  -5  -8   34.58   12.43
   7  -5  -8   25.31   11.56
  -7   5   7  429.07   23.66
   7  -5  -7  497.35   34.16
  -7   5   7  444.56   25.56
   7  -5  -7  461.31   32.81
  -7   5   6  225.89   17.06
   7  -5  -6  281.47   24.92
   7  -5  -6  267.79   24.90
  -7   5   5   24.30    6.20
   7  -5  -5   18.13    7.58
  -7   5   4 1096.87   38.14
   7  -5  -4 1098.69   48.21
  -7   5   3   30.40    7.59
   7  -5  -3   19.61    6.87
  -7   5   2  431.85   24.51
   7  -5  -2  401.87   29.22
  -7   5   1  101.93   12.36
   7  -5  -1   64.94   11.74
  -7   5   0   12.22    6.36
   7  -5   0    5.22    6.70
  -7   5  -1    6.17    5.12
   7  -5   1    4.10    6.95
  -7   5  -2   -4.61    5.09
   7  -5   2   -1.54    5.87
  -7   5  -3  146.23   14.10
   7  -5   3  131.08   17.07
  -7   5  -4  460.37   25.15
   7  -5   4  575.22   34.44
  -7   5  -5  983.86   36.81
   7  -5   5 1033.23   46.66
  -7   5  -6  745.24   32.90
  -7   5  -7  180.18   16.58
  -7   5  -8  636.49   31.43
  -7   5  -9  332.66   23.45
  -7   5 -10   43.06    9.53
  -7   5 -11    1.40    5.23
  -7   5 -12   81.14   13.38
  -7   5 -13   20.07    8.81
  -7   5 -14   33.40   11.89
  -7   5 -15  203.57   23.88
  -7   5 -16   30.35   11.82
  -7   5 -19  164.92   57.07
   7  -4 -14    0.85   11.36
   7  -4 -13   13.29   10.75
  -7   4  12   50.19   11.12
   7  -4 -12   64.24   17.14
  -7   4  11   14.39    6.59
   7  -4 -11   33.98   12.64
   7  -4 -11   29.48   12.13
  -7   4  10  435.99   27.08
   7  -4 -10  476.63   35.89
   7  -4 -10  449.64   34.90
   7  -4  -9  252.96   25.71
   7  -4  -9  204.58   23.23
  -7   4   9  182.71   17.15
  -7   4   8  359.82   19.37
   7  -4  -8  443.46   33.89
   7  -4  -8  403.63   31.91
  -7   4   8  365.54   22.87
  -7   4   7    6.31    4.14
   7  -4  -7   11.99    9.28
   7  -4  -7    2.05    8.98
  -7   4   6 1120.33   35.24
   7  -4  -6 1078.12   48.69
   7  -4  -6 1216.16   52.04
  -7   4   5 1427.16   40.72
   7  -4  -5 1337.87   53.46
   7  -4  -5 1348.51   52.32
  -7   4   4  223.28   16.39
   7  -4  -4  218.70   20.99
   7  -4  -4  194.14   21.84
  -7   4   3   89.91   10.71
   7  -4  -3   63.65   11.60
   7  -4  -3   83.74   14.67
  -7   4   2  275.98   18.79
   7  -4  -2  252.99   24.00
  -7   4   1  918.40   33.25
   7  -4  -1  951.38   44.31
  -7   4   0  185.73   15.66
   7  -4   0  191.60   20.70
  -7   4  -1   82.05   10.42
   7  -4   1  101.10   15.71
  -7   4  -2  577.06   26.28
   7  -4   2  588.75   34.32
  -7   4  -3   44.72    7.83
   7  -4   3   50.73   11.40
  -7   4  -4  607.18   26.79
   7  -4   4  621.16   35.14
  -7   4  -5  294.88   18.98
   7  -4   5  307.25   25.17
  -7   4  -6  150.54   13.84
   7  -4   6  171.48   19.16
  -7   4  -7 1064.80   37.11
   7  -4   7 1098.27   47.59
  -7   4  -8  120.33   13.01
  -7   4  -9  227.19   18.11
  -7   4 -10  252.44   19.99
  -7   4 -11    5.64    5.75
  -7   4 -12  226.88   20.70
  -7   4 -13  181.68   19.69
  -7   4 -14   54.06   12.65
  -7   4 -15    3.21    6.56
  -7   4 -16   19.27   10.41
  -7   4 -17   -1.19    9.80
  -7   4 -19  815.21  107.52
   7  -3 -15    8.36   10.65
   7  -3 -14   28.24   13.86
   7  -3 -13   71.60   16.42
  -7   3  12    6.24    6.45
   7  -3 -12    5.05    7.78
  -7   3  11  292.16   22.81
   7  -3 -11  288.29   28.49
   7  -3 -11  244.78   26.32
  -7   3  10   22.12    7.35
   7  -3 -10   17.68    8.96
   7  -3 -10   13.00    9.87
  -7   3   9   29.96    7.59
   7  -3  -9   54.91   13.08
   7  -3  -9   42.01   12.36
  -7   3   8    3.07    3.34
   7  -3  -8   -0.93    7.54
   7  -3  -8   13.05    7.29
  -7   3   7  608.75   23.93
   7  -3  -7  688.82   38.82
   7  -3  -7  690.09   39.40
  -7   3   6   53.02    7.82
   7  -3  -6   50.75   11.89
   7  -3  -6   57.48   12.34
  -7   3   5   89.07    9.91
   7  -3  -5   95.08   14.95
   7  -3  -5   92.92   14.84
  -7   3   4    4.34    3.76
   7  -3  -4    1.38    6.17
   7  -3  -4   11.26    6.38
  -7   3   3  142.58   12.36
   7  -3  -3  132.08   15.91
   7  -3  -3  151.29   18.99
   7  -3  -2   58.68   11.54
   7  -3  -2   51.34   11.45
  -7   3   2   67.33    8.85
   7  -3  -1  624.55   31.00
   7  -3  -1  648.38   36.43
  -7   3   1  622.74   25.33
   7  -3   0  129.18   17.18
  -7   3   0  142.98   13.03
   7  -3   1  502.21   32.27
   7  -3   2  337.26   26.35
   7  -3   3  434.04   29.11
   7  -3   4   28.01    8.66
   7  -3   5  175.62   19.43
   7  -3   6  363.96   26.09
  -7   3  -6  378.43   20.48
   7  -3   7   81.73   13.41
  -7   3  -7   72.09    9.61
   7  -3   8 1232.26   48.28
  -7   3  -8 1391.71   40.09
  -7   3  -9  367.97   21.45
  -7   3 -10   10.07    5.21
  -7   3 -11   34.34    8.08
  -7   3 -12   72.93   11.69
  -7   3 -13   28.38    7.56
  -7   3 -14    0.92    5.68
  -7   3 -15   30.10   11.04
  -7   3 -16  714.66   40.23
  -7   3 -17    0.76    9.15
  -7   3 -18  889.88   95.22
  -7   3 -19   36.80   35.40
   7  -2 -15  107.81   20.34
   7  -2 -14   32.87   13.60
   7  -2 -13  103.35   20.08
   7  -2 -12  647.31   42.49
   7  -2 -12  659.58   41.95
  -7   2  11   -2.38    5.90
   7  -2 -11   -4.04    7.43
   7  -2 -11    1.16    7.51
   7  -2 -10  715.47   41.08
  -7   2  10  740.80   31.74
  -7   2   9    3.79    3.20
   7  -2  -9   -2.43    7.15
   7  -2  -9    5.80    8.29
  -7   2   8  241.44   13.88
   7  -2  -8  270.74   25.75
   7  -2  -8  254.69   24.41
  -7   2   7   77.08    8.39
   7  -2  -7   64.02   12.55
   7  -2  -7   81.85   14.59
   7  -2  -6  297.42   25.23
   7  -2  -6  350.88   27.01
  -7   2   6  354.33   17.46
   7  -2  -5  511.41   32.05
   7  -2  -5  519.80   32.15
   7  -2  -4  167.17   18.32
   7  -2  -4  191.79   20.10
   7  -2  -3 1401.43   49.66
   7  -2  -3 1427.18   52.62
   7  -2  -2 1247.56   46.60
   7  -2  -2 1076.70   45.51
   7  -2  -1  129.42   15.15
   7  -2  -1  120.13   16.39
   7  -2   0  623.73   29.96
   7  -2   0  651.31   34.83
   7  -2   1  299.42   24.20
   7  -2   2  558.93   33.05
   7  -2   3 1203.95   47.48
   7  -2   4   51.34   11.08
   7  -2   5  421.77   28.14
   7  -2   6   43.54   10.74
   7  -2   7  350.99   25.50
   7  -2   8    9.89    5.88
   7  -2   9  106.07   14.44
   7  -2  10  500.29   30.99
  -7   2 -12  860.76   34.52
  -7   2 -13 1425.68   46.28
  -7   2 -14   86.73   12.74
  -7   2 -15  914.29   41.60
  -7   2 -16   -8.18    8.83
  -7   2 -17   71.44   15.41
  -7   2 -18   78.73   30.34
   7  -1 -15   64.48   16.70
   7  -1 -14  206.83   26.45
   7  -1 -13  532.71   39.18
   7  -1 -13  524.99   37.89
   7  -1 -12    3.30    6.97
   7  -1 -12   14.34    9.37
   7  -1 -11  702.54   42.53
  -7   1  11  795.73   33.62
   7  -1 -10    1.02    6.76
   7  -1 -10   13.77    7.60
  -7   1   9  104.80    8.56
   7  -1  -9   91.54   15.33
   7  -1  -9  125.16   17.70
   7  -1  -8  451.89   31.45
   7  -1  -8  426.29   30.61
  -7   1   8  527.32   19.25
   7  -1  -7  239.89   23.09
   7  -1  -7  242.29   23.06
   7  -1  -6  214.10   21.11
   7  -1  -6  275.42   24.08
   7  -1  -5  177.24   19.54
   7  -1  -5  156.90   18.00
   7  -1  -4   18.35    7.54
   7  -1  -4    4.51    7.28
   7  -1  -3    6.54    6.43
   7  -1  -3    2.85    5.59
   7  -1  -2  144.51   15.98
   7  -1  -2  130.78   16.35
   7  -1  -1  733.18   33.71
   7  -1  -1  732.21   36.79
   7  -1   0   81.87   11.64
   7  -1   0   94.11   13.99
   7  -1   1  360.74   25.30
   7  -1   1  332.18   20.86
   7  -1   2 2288.97   63.66
   7  -1   3   13.00    8.33
   7  -1   4 1472.69   51.56
   7  -1   5    9.38    8.01
   7  -1   6  412.12   26.92
   7  -1   7  135.34   15.75
   7  -1   8   12.05    8.07
   7  -1   9    7.57    6.76
   7  -1  10   26.49    7.53
   7  -1  11  902.21   39.56
  -7   1 -15   40.00    8.95
  -7   1 -16  475.01   28.95
  -7   1 -17  548.10   46.19
  -7   1 -17  358.03   26.69
   7   0 -15  143.37   23.77
   7   0 -14  104.27   19.06
   7   0 -14  174.38   23.49
   7   0 -13  255.74   28.46
   7   0 -13  242.48   25.21
   7   0 -12   72.00   15.30
   7   0 -12   74.83   14.73
   7   0 -11   52.04   13.78
   7   0 -11   44.09   12.73
   7   0 -10  438.86   32.63
   7   0 -10  429.48   30.02
   7   0  -9  207.70   22.48
   7   0  -9  233.90   22.11
   7   0  -8  339.55   27.56
   7   0  -8  262.07   23.36
   7   0  -7  374.26   28.06
   7   0  -7  392.01   27.24
   7   0  -6   -2.66    5.51
   7   0  -6   -9.47    8.00
   7   0  -5   10.14    5.58
   7   0  -5   17.91    7.05
   7   0  -4  570.56   31.53
   7   0  -4  609.79   32.88
   7   0  -3  428.98   27.84
   7   0  -3  454.47   27.81
   7   0  -2 1177.42   45.40
   7   0  -2 1103.40   41.26
   7   0  -1   81.55   12.97
   7   0  -1   60.95   10.20
   7   0   0 1562.92   46.00
   7   0   0 1599.35   52.94
   7   0   1  452.82   24.50
   7   0   1  398.08   26.65
   7   0   2  954.01   40.16
   7   0   2  853.13   31.25
   7   0   3  575.12   24.74
   7   0   3  443.27   27.51
   7   0   4  988.53   40.53
   7   0   5  732.05   34.51
   7   0   6  364.72   24.44
   7   0   7   29.13    8.87
   7   0   8   24.46    6.96
   7   0   9  108.20   13.29
   7   0  10  153.21   16.20
   7   0  11  117.90   13.94
  -7   0 -16  154.26   21.23
  -7   0 -17  406.44   25.82
   7   1 -15  111.13   20.61
   7   1 -14   19.20   11.83
   7   1 -14   31.58   12.40
   7   1 -13   86.07   17.50
   7   1 -13  118.82   18.34
   7   1 -12   33.92   11.01
   7   1 -12   27.86   10.94
   7   1 -11  242.69   25.06
   7   1 -11  201.11   21.69
   7   1 -10   29.79    8.17
   7   1 -10   39.53   11.55
   7   1  -9  119.49   16.37
   7   1  -9  127.92   16.04
   7   1  -8  131.21   16.96
   7   1  -8  125.78   15.53
   7   1  -7  152.66   17.89
   7   1  -7  152.86   16.95
   7   1  -6  380.67   26.85
   7   1  -6  365.46   25.30
   7   1  -5    2.68    6.33
   7   1  -5   16.01    7.73
   7   1  -4   17.01    7.43
   7   1  -4   14.48    6.13
   7   1  -3  397.73   25.72
   7   1  -3  410.44   25.89
   7   1  -2   -3.37    5.97
   7   1  -2   -1.20    5.54
   7   1  -1  941.21   38.94
   7   1  -1  848.46   34.91
   7   1   0   99.95   13.45
   7   1   0   78.76   11.15
   7   1   1 1669.56   52.16
   7   1   1 1703.69   45.15
   7   1   2    8.32    5.50
   7   1   2    4.33    5.31
   7   1   3  709.26   33.88
   7   1   3  675.82   26.18
   7   1   4 1427.00   47.43
   7   1   5   17.42    7.08
   7   1   6 1019.80   39.18
   7   1   7  309.08   21.74
   7   1   8   45.76   11.51
   7   1   9  134.74   14.99
   7   1  10  333.31   21.98
   7   1  11  211.86   18.02
   7   1  12  396.91   25.27
  -7  -1 -15  117.86   13.75
   7   2 -15   43.91   13.81
   7   2 -14   45.68   12.45
   7   2 -14   72.04   17.33
   7   2 -13    4.97    7.54
   7   2 -13    6.50    8.98
   7   2 -12   89.24   14.70
   7   2 -12   71.52   15.40
   7   2 -11   64.59   12.83
   7   2 -11   84.22   15.89
   7   2 -10  107.58   15.58
   7   2 -10   85.29   15.10
   7   2  -9   -0.77    5.19
   7   2  -9    5.11    7.45
   7   2  -8  431.32   27.36
   7   2  -8  445.54   30.60
   7   2  -7  263.65   22.73
   7   2  -7  273.24   21.64
   7   2  -6   45.65   10.08
   7   2  -6   28.81    9.01
   7   2  -5  239.96   20.62
   7   2  -5  225.41   19.31
   7   2  -4  779.47   35.60
   7   2  -4  705.70   33.23
   7   2  -3  228.37   19.23
   7   2  -3  260.37   20.22
   7   2  -2 1223.77   42.03
   7   2  -2 1184.19   41.81
   7   2  -1   87.94   11.82
   7   2  -1   93.66   13.18
   7   2   0  371.79   22.42
   7   2   0  292.96   21.13
   7   2   1   66.38   11.35
   7   2   1   67.63   10.20
   7   2   2  355.19   23.85
   7   2   2  410.16   21.10
   7   2   3  341.68   18.77
   7   2   3  375.20   24.51
   7   2   4  564.16   29.70
   7   2   4  543.86   22.50
   7   2   5  646.93   30.92
  -7  -2  -6   58.01    8.85
   7   2   6   39.10    9.62
  -7  -2  -7  246.74   15.71
   7   2   7  262.41   19.68
  -7  -2  -8  975.21   29.90
   7   2   8  969.53   36.19
  -7  -2  -9   67.16    8.79
   7   2   9   75.29   11.19
  -7  -2 -10  459.75   20.19
   7   2  10  484.26   26.27
   7   2  11  348.03   22.68
   7   2  12   45.19    9.44
   7   2  13  120.29   14.52
  -7  -2 -14   15.50    6.96
   7   3 -15  247.54   26.51
   7   3 -14  -10.62    8.23
   7   3 -14   -3.19    9.22
   7   3 -13   53.73   13.73
   7   3 -13   54.26   15.79
   7   3 -12   35.64   10.50
   7   3 -12   41.94   13.05
   7   3 -11   28.79    9.79
   7   3 -11   26.73   10.32
   7   3 -10   37.54   10.18
   7   3 -10   25.63    9.46
   7   3  -9   44.92   11.48
   7   3  -9   20.67    7.19
   7   3  -8   -4.05    5.55
   7   3  -8    9.40    7.82
   7   3  -7   68.20   11.28
   7   3  -7   49.38   11.05
   7   3  -6   16.94    6.85
   7   3  -6   32.05    8.54
   7   3  -5  487.28   27.50
   7   3  -5  442.91   27.56
   7   3  -4   12.12    6.11
   7   3  -4    4.99    6.49
   7   3  -3 1460.46   45.86
   7   3  -3 1653.60   50.04
   7   3  -2  278.46   19.86
   7   3  -2  280.55   20.46
   7   3  -1  495.09   25.59
   7   3  -1  485.90   26.54
   7   3   0 1056.13   36.11
   7   3   0 1000.72   37.72
   7   3   1   85.11   10.74
   7   3   1   91.43   12.42
   7   3   2  713.17   27.87
   7   3   2  658.63   31.24
   7   3   3  659.79   30.97
   7   3   3  745.74   26.67
   7   3   4  164.37   12.22
   7   3   4  172.88   16.11
  -7  -3  -5  203.94   13.77
   7   3   5  203.76   17.87
   7   3   5  220.88   13.90
  -7  -3  -6  531.23   20.62
   7   3   6  578.90   28.88
   7   3   7 1361.93   42.64
  -7  -3  -7 1337.57   31.00
  -7  -3  -8   -5.67    4.38
   7   3   8    7.29    5.88
   7   3   9 1812.95   47.65
  -7  -3  -9 1951.70   34.32
  -7  -3 -10 1453.38   28.89
   7   3  10 1467.31   59.33
   7   3  10 1461.11   43.92
   7   3  11   46.74   12.94
   7   3  11   78.90   11.49
   7   3  12  766.96   44.70
   7   3  12  834.48   34.37
   7   3  13   15.36   10.51
   7   3  13    8.30    7.42
   7   4 -15   37.22   12.81
   7   4 -14  170.31   22.28
   7   4 -13   14.96   10.91
   7   4 -13   29.77   10.73
   7   4 -12  144.18   18.96
   7   4 -12  129.16   20.01
   7   4 -11    4.99    8.21
   7   4 -11    1.06    6.73
   7   4 -10    5.98    6.00
   7   4 -10    3.48    5.48
   7   4  -9    9.17    7.10
   7   4  -9   21.69    8.19
   7   4  -8   26.03    8.76
   7   4  -8   20.82    7.69
   7   4  -7   87.36   12.69
   7   4  -7   82.96   13.76
   7   4  -6   24.81    8.39
   7   4  -6   31.75    8.08
   7   4  -5  347.72   23.77
   7   4  -5  357.45   24.97
   7   4  -4  619.84   30.47
   7   4  -4  556.35   29.91
   7   4  -3   10.31    5.55
   7   4  -3   -4.05    4.63
   7   4  -2  364.42   22.53
   7   4  -2  366.13   22.65
   7   4  -1   88.42   12.04
   7   4  -1   66.28   10.03
   7   4   0   23.86    7.43
   7   4   0   17.67    6.51
   7   4   1  171.84   14.55
   7   4   1  173.78   15.82
   7   4   2    6.24    4.91
   7   4   2   -0.85    4.28
   7   4   3   42.94    8.48
   7   4   3   26.05    6.09
  -7  -4  -4   35.48    8.48
   7   4   4   32.73    7.61
   7   4   4   44.31    7.69
   7   4   5  149.85   11.18
  -7  -4  -5  131.77   11.26
   7   4   5  118.79   16.07
   7   4   5  123.67   13.92
   7   4   6    0.83    6.87
  -7  -4  -6   -6.85    5.13
   7   4   6    1.84    4.61
  -7  -4  -7  153.30    9.71
   7   4   7  153.26   18.93
   7   4   7  191.43   16.73
   7   4   8   80.73   14.39
   7   4   8   57.00    9.72
   7   4   9   33.25   10.97
   7   4   9   19.29    6.95
   7   4  10  175.19   21.47
   7   4  10  163.70   14.71
   7   4  11 1062.93   50.81
   7   4  11 1262.34   40.80
   7   4  12  402.83   31.78
   7   4  12  418.90   25.30
   7   4  13  470.16   35.27
   7   4  13  681.86   32.69
   7   4  14    6.90   10.37
   7   4  14    4.78    9.28
   7   4  15  148.16   21.25
   7   4  16  -11.87   12.49
   7   4  17    5.46    9.37
   7   4  18    9.71    9.26
   7   5 -14  110.59   19.49
   7   5 -13  166.37   21.65
   7   5 -13  200.19   27.22
   7   5 -12   -1.01    7.84
   7   5 -12   -2.94    7.41
   7   5 -11   -1.84    8.60
   7   5 -11   20.71    8.82
   7   5 -10   18.49   10.55
   7   5 -10    2.41    7.17
   7   5  -9  124.57   16.59
   7   5  -9  118.26   17.74
   7   5  -8   15.95    7.86
   7   5  -8   -1.03    5.47
   7   5  -7  164.24   17.67
   7   5  -7  154.69   18.22
   7   5  -6   31.67    9.52
   7   5  -6   24.88    8.00
   7   5  -5  226.65   19.35
   7   5  -5  191.38   18.48
   7   5  -4  161.27   16.73
   7   5  -4  183.20   17.56
   7   5  -3   60.52   10.29
   7   5  -3   72.93   11.17
   7   5  -2  273.55   20.11
   7   5  -2  267.37   19.42
   7   5  -1 1619.51   47.70
   7   5  -1 1669.68   46.23
   7   5   0  249.57   18.64
   7   5   0  247.09   17.49
   7   5   1   87.08   11.50
   7   5   1   91.24   10.90
   7   5   2  481.69   22.08
   7   5   2  518.53   33.84
   7   5   2  449.24   24.78
   7   5   3   59.60    8.38
   7   5   3   80.58   14.82
   7   5   3   68.30   10.30
  -7  -5  -4  139.50   12.18
   7   5   4  161.33   11.98
   7   5   4  146.50   14.47
   7   5   5  469.11   32.67
   7   5   5  497.34   26.01
   7   5   5  479.32   18.68
  -7  -5  -6    2.66    3.94
   7   5   6   11.35    4.79
   7   5   6   12.18    9.54
   7   5   6    4.63    4.74
   7   5   7    1.61    6.74
   7   5   7   -5.26    6.16
   7   5   8   85.54   14.69
   7   5   8  128.94   13.97
   7   5   9  280.06   26.23
   7   5   9  238.68   18.01
   7   5  10  606.64   38.22
   7   5  10  591.47   27.41
   7   5  11  284.79   26.66
   7   5  11  306.56   20.21
   7   5  12  849.04   46.59
   7   5  12  975.59   37.36
   7   5  13  168.40   22.41
   7   5  13  212.50   18.56
   7   5  14  478.90   36.93
   7   5  15  112.27   19.46
   7   5  16    9.36    8.72
   7   5  17   13.36   10.09
   7   5  18   43.26   15.24
   7   5  19   32.80   14.74
   7   5  20   11.40   11.68
   7   6 -13    2.92    8.80
   7   6 -12  155.96   22.43
   7   6 -12  127.17   21.62
   7   6 -11  166.89   21.16
   7   6 -11  218.21   25.77
   7   6 -10  227.71   23.29
   7   6 -10  148.05   20.78
   7   6  -9  219.59   21.85
   7   6  -9  195.86   22.34
   7   6  -8  211.86   20.83
   7   6  -8  223.80   22.97
   7   6  -7    7.88    6.79
   7   6  -7   17.59    7.19
   7   6  -6  477.32   29.40
   7   6  -6  435.40   29.33
   7   6  -5    8.18    7.09
   7   6  -5   -8.89    6.00
   7   6  -4   33.11    9.09
   7   6  -4   28.05    7.42
   7   6  -3   17.70    6.61
   7   6  -3    9.86    5.24
   7   6  -2  720.28   33.14
   7   6  -2  728.41   32.34
   7   6  -1  392.22   24.03
   7   6  -1  352.70   21.98
   7   6   0  691.95   39.09
   7   6   0  602.23   29.47
   7   6   0  628.41   27.71
   7   6   1  181.95   21.01
   7   6   1  172.83   15.55
   7   6   1  153.56   13.14
   7   6   2   57.43   13.33
   7   6   2   61.36    9.81
   7   6   2   41.46    7.09
   7   6   3  117.37   17.49
   7   6   3  130.88   13.67
   7   6   3  107.77   10.49
   7   6   4 1044.97   29.00
   7   6   4 1074.46   37.72
   7   6   5   42.77   12.27
   7   6   5   44.15    8.28
   7   6   5   33.63    5.68
   7   6   6  237.62   11.73
   7   6   6  260.44   18.99
   7   6   7  117.99   17.73
   7   6   7  149.41   14.80
   7   6   8   91.30   16.40
   7   6   8  120.72   13.50
   7   6   9  175.52   21.50
   7   6   9  179.23   16.46
   7   6  10  569.24   38.38
   7   6  10  595.69   27.82
   7   6  11   55.98   14.09
   7   6  11   84.47   11.48
   7   6  12  401.56   33.35
   7   6  12  527.63   27.96
   7   6  13  667.79   44.12
   7   6  14  452.50   37.43
   7   6  15   67.07   17.00
   7   6  16  313.32   32.47
   7   6  17  119.87   22.26
   7   6  18   76.74   19.10
   7   6  19  137.65   26.83
   7   6  20   40.43   17.81
   7   6  21   22.33   17.47
   7   7 -12   18.02   10.42
   7   7 -11    3.03    8.65
   7   7 -11  -11.88    8.38
   7   7 -10   34.24   11.55
   7   7 -10   31.28   10.39
   7   7  -9   15.66    7.94
   7   7  -9   41.95   12.12
   7   7  -8   60.56   13.07
   7   7  -8   77.12   14.39
   7   7  -7  379.88   28.53
   7   7  -7  375.65   28.80
   7   7  -6   17.64    9.14
   7   7  -6    4.36    5.04
   7   7  -5  246.70   22.00
   7   7  -5  288.71   23.41
   7   7  -4   33.13    8.87
   7   7  -4   45.59    9.87
   7   7  -3  225.69   20.05
   7   7  -3  211.47   18.46
   7   7  -2   49.84    9.95
   7   7  -2   72.07   10.79
   7   7  -1  123.26   19.97
   7   7  -1  132.08   14.71
   7   7  -1  141.42   14.19
   7   7   0    7.81    5.28
   7   7   0   18.77   10.35
   7   7   0    8.76    5.62
   7   7   1   -2.83    3.83
   7   7   1   -9.71    9.29
   7   7   1   -4.23    5.45
   7   7   2  379.06   30.25
   7   7   2  318.86   21.44
   7   7   2  316.39   18.15
   7   7   3  523.08   27.22
   7   7   3  545.12   22.56
   7   7   4   95.17   16.67
   7   7   4   88.00   11.27
   7   7   4  107.11    9.97
   7   7   5  102.33    9.26
   7   7   5  122.13   18.74
   7   7   5  138.59   14.00
   7   7   6  460.39   33.69
   7   7   6  473.13   24.99
   7   7   7 1303.64   56.83
   7   7   7 1308.09   41.87
   7   7   8  223.52   24.09
   7   7   8  241.11   18.83
   7   7   9  118.66   18.28
   7   7   9  126.43   14.02
   7   7  10   47.71   11.21
   7   7  10   83.72   12.21
   7   7  11   42.17   12.16
   7   7  11   40.24    9.70
   7   7  12    0.22    8.28
   7   7  13  117.38   19.04
   7   7  14    2.04    9.26
   7   7  15  126.64   21.33
   7   7  16   -3.89    9.89
   7   7  17   80.90   19.19
   7   7  18  121.23   22.75
   7   7  19    6.41   12.32
   7   7  20  375.58   40.67
   7   8 -10   40.84   13.31
   7   8 -10   25.22   11.38
   7   8  -9    3.22    8.07
   7   8  -9   -0.76    7.27
   7   8  -8  265.81   25.81
   7   8  -8  213.97   23.87
   7   8  -7   13.48    7.95
   7   8  -7    0.48    7.28
   7   8  -6  677.32   38.32
   7   8  -6  602.78   36.22
   7   8  -5    3.36    5.19
   7   8  -5   15.00    8.69
   7   8  -4  553.94   32.70
   7   8  -4  541.51   31.99
   7   8  -3  239.33   21.48
   7   8  -3  205.37   19.28
   7   8  -2    5.56    5.84
   7   8  -2   21.87   11.93
   7   8  -2    3.86    5.70
   7   8  -1    5.87    5.08
   7   8  -1    5.94    7.56
   7   8  -1    9.60    5.62
   7   8   0   42.53   12.45
   7   8   0   54.93   10.66
   7   8   0   51.82    8.75
   7   8   1    8.53    5.61
   7   8   1   11.83   10.10
   7   8   1    7.64    4.42
   7   8   2   39.95    6.99
   7   8   2   23.99   11.17
   7   8   2   46.84    9.02
   7   8   3  195.85   23.91
   7   8   3  169.85   13.42
   7   8   4   27.11   10.78
   7   8   4   22.30    5.44
   7   8   4   25.38    7.79
   7   8   5   10.93    7.94
   7   8   5   20.63    6.83
   7   8   5   11.52    4.61
   7   8   6  457.44   34.38
   7   8   6  436.51   24.50
   7   8   7  209.72   24.10
   7   8   7  224.95   18.02
   7   8   8  490.10   36.43
   7   8   8  547.27   27.49
   7   8   9   98.36   17.98
   7   8   9   89.56   12.31
   7   8  10   30.01   10.95
   7   8  10   19.33    7.44
   7   8  11  241.02   27.45
   7   8  12   23.40   10.84
   7   8  13   70.13   15.80
   7   8  14  143.01   21.77
   7   8  15  155.30   24.74
   7   8  16   20.96   11.48
   7   8  17   45.13   16.19
   7   8  18   41.51   15.44
   7   8  19  154.75   27.84
   7   9  -9   -7.40    9.84
   7   9  -9   -6.98    8.18
   7   9  -8    2.84    7.90
   7   9  -8   13.42    9.82
   7   9  -7  140.95   18.98
   7   9  -7  119.79   18.18
   7   9  -6  242.81   25.14
   7   9  -6  243.65   25.12
   7   9  -5  219.96   23.33
   7   9  -5  218.43   22.83
   7   9  -4    3.86    6.32
   7   9  -4    5.44    6.54
   7   9  -3  244.19   23.61
   7   9  -3  292.84   23.77
   7   9  -2  170.20   22.50
   7   9  -2  156.48   18.07
   7   9  -2  166.74   17.96
   7   9  -1  237.34   26.60
   7   9  -1  234.32   21.05
   7   9  -1  210.95   18.90
   7   9   0    5.15    5.14
   7   9   0   10.36    7.73
   7   9   0   14.29    7.22
   7   9   1  191.00   18.34
   7   9   1  155.73   14.33
   7   9   2   24.94    5.95
   7   9   2   41.08   12.87
   7   9   2   33.88    8.89
   7   9   3  668.28   43.09
   7   9   3  610.27   30.53
   7   9   4    1.22    7.55
   7   9   4   -5.97    5.71
   7   9   5  702.54   44.94
   7   9   5  598.67   29.72
   7   9   6  502.61   38.30
   7   9   6  414.01   24.28
   7   9   7  768.17   47.74
   7   9   7  698.16   31.93
   7   9   8  452.73   37.66
   7   9   8  336.11   21.91
   7   9   9  213.06   26.76
   7   9   9  192.03   17.23
   7   9  10 1039.25   58.02
   7   9  11   62.35   16.19
   7   9  12   -2.65    9.56
   7   9  13   13.04   11.25
   7   9  14  108.34   21.65
   7   9  15    9.57   12.25
   7   9  16   -6.66   13.11
   7   9  17   26.28   15.71
   7   9  18   35.82   15.50
   7  10  -8  169.85   23.89
   7  10  -7  125.82   19.86
   7  10  -7  105.61   18.28
   7  10  -6  142.06   20.03
   7  10  -6  127.75   19.80
   7  10  -5   65.23   14.58
   7  10  -5   71.51   14.88
   7  10  -4  409.77   31.49
   7  10  -4  355.64   29.11
   7  10  -3  153.50   19.45
   7  10  -3  141.30   17.76
   7  10  -2   24.83   13.63
   7  10  -2   32.78   10.53
   7  10  -2   11.36    7.49
   7  10  -1   43.63   13.90
   7  10  -1   34.21   10.09
   7  10  -1   31.13    9.56
   7  10   0  465.31   37.33
   7  10   0  439.43   29.45
   7  10   0  402.24   25.78
   7  10   1    2.09    9.50
   7  10   1   -6.26    6.19
   7  10   1    6.90    6.44
   7  10   2  307.91   31.09
   7  10   2  253.54   21.25
   7  10   3   27.65   12.68
   7  10   3    5.78    5.42
   7  10   4   55.00   14.91
   7  10   4   18.59    7.24
   7  10   5  130.61   21.33
   7  10   5   98.71   12.87
   7  10   6  374.38   35.22
   7  10   6  277.04   21.11
   7  10   7    6.31    9.47
   7  10   7    6.46    5.45
   7  10   8  486.86   41.15
   7  10   8  352.09   23.38
   7  10   9  179.03   26.20
   7  10  10   83.03   18.65
   7  10  11  431.14   39.77
   7  10  12  172.93   26.60
   7  10  13   29.29   15.79
   7  10  14   99.69   23.09
   7  10  15  138.72   25.43
   7  10  16   49.67   17.74
   7  11  -7   73.98   17.56
   7  11  -6    0.49    8.80
   7  11  -5   29.06   10.30
   7  11  -5   19.82    9.77
   7  11  -4    3.53    8.73
   7  11  -4   -2.12    8.49
   7  11  -3  117.43   18.56
   7  11  -3   75.42   14.43
   7  11  -2  140.16   19.51
   7  11  -2   70.24   13.46
   7  11  -1   26.34   14.14
   7  11  -1    7.63    6.51
   7  11  -1   12.26    7.61
   7  11   0  277.38   31.43
   7  11   0  246.41   23.71
   7  11   1  480.80   41.02
   7  11   1  445.51   30.62
   7  11   2    8.88   11.63
   7  11   2   10.72    6.79
   7  11   3  412.01   38.23
   7  11   3  336.03   25.44
   7  11   4  155.60   24.55
   7  11   4   91.89   13.15
   7  11   5  113.78   20.27
   7  11   5   83.29   12.91
   7  11   6  126.45   23.18
   7  11   6   73.28   11.75
   7  11   7   64.22   18.95
   7  11   7   39.18    9.40
   7  11   8   15.91   13.22
   7  11   9   20.20   16.81
   7  11  10   46.66   14.43
   7  11  11  120.59   23.62
   7  11  12   67.41   19.44
   7  11  13  182.74   28.93
   7  12  -2   30.40   11.61
   7  12  -1    3.97    7.70
   7  12   0   12.58   14.45
   7  12   0   14.14    9.78
   7  12   1   18.44   13.49
   7  12   1   21.10    8.14
   7  12   2  248.90   30.94
   7  12   2  169.57   19.93
   7  12   3   40.49   15.99
   7  12   3   29.99   10.34
   7  12   4  165.60   26.96
   7  12   4  138.80   17.74
   7  12   5  202.16   29.04
   7  12   5  110.97   15.48
   7  12   6   51.69   17.10
   7  12   7  148.31   25.82
   7  12   8   79.77   22.09
   7  12   9    6.84   12.35
   7  12  10  144.95   26.64
   7  12  11    0.37   13.62
   7  13   1  480.25   34.57
   7  13   2   79.38   21.93
   7  13   2   75.00   15.05
   7  13   3  620.23   52.13
   7  13   3  358.99   28.29
   7  13   4   44.87   19.57
   7  13   4   23.55    9.65
   7  13   5  426.48   44.89
   7  13   6   64.90   21.52
   7  13   7    6.37   15.54
  -8  10   5   97.53   18.61
  -8  10   4   61.89   18.94
  -8  10   3  104.38   17.57
  -8  10   2    9.95   10.22
  -8  10   1    1.06    8.52
  -8  10   0   37.76   12.07
  -8  10  -1  111.27   18.31
  -8  10  -1  131.63   21.11
  -8  10  -2   48.70   13.06
  -8  10  -3   52.59   13.13
  -8  10  -4  100.99   16.87
  -8  10  -5  108.51   17.00
  -8  10  -6  207.45   22.05
  -8  10  -7   76.92   14.22
  -8  10  -8   19.59   10.07
  -8   9   6   17.02   10.55
  -8   9   5  106.85   17.24
  -8   9   4  128.45   18.54
  -8   9   4  128.08   18.81
  -8   9   3   49.15   13.20
  -8   9   3   40.89   12.20
  -8   9   2   13.22    9.45
  -8   9   2   -0.77    8.04
  -8   9   1   63.08   14.00
  -8   9   1   25.58   11.59
  -8   9   0   35.97   10.58
  -8   9   0   32.22   12.12
  -8   9  -1   -4.45    8.04
  -8   9  -1   -2.06    8.21
  -8   9  -2   -0.94    6.64
  -8   9  -2   31.41   11.85
  -8   9  -3   29.54   10.26
  -8   9  -3   33.57   12.34
  -8   9  -4   22.80    8.22
  -8   9  -4   39.15   12.40
  -8   9  -5   60.17   11.81
  -8   9  -5   58.29   14.59
  -8   9  -6   30.50    9.15
  -8   9  -6   46.81   13.69
  -8   9  -7  113.07   18.48
  -8   9  -7   98.79   15.06
  -8   9  -8  248.47   27.27
  -8   9  -8  224.66   21.80
  -8   9  -9   16.55    8.65
  -8   9  -9   42.01   13.12
  -8   9 -10  352.27   26.27
  -8   8   8   72.91   14.03
  -8   8   7   34.79   11.01
  -8   8   7   46.94   12.44
  -8   8   6  222.75   23.23
  -8   8   6  180.94   20.09
   8  -8  -6  243.00   26.77
  -8   8   5  168.25   20.34
  -8   8   5  164.41   19.68
   8  -8  -5  169.30   23.36
  -8   8   4  507.16   33.74
  -8   8   4  436.74   30.82
[truncated: 99,712 more chars]
